# Supplementary material for: Cross-Species Single-Cell Analysis of Pancreatic Ductal Adenocarcinoma Reveals Antigen-Presenting Cancer-Associated Fibroblasts
Source: Oxford University Press journal article supplement (doi:10.1158/2159-8290.cd-19-0094), 2019-06-13
Supplement: 21598290cd190094-sup-215864_2_supp_5552223_ps91bp.xlsx [file 21598290cd190094-sup-215864_2_supp_5552223_ps91bp.xlsx]

## Sheet: Cluster 1
	Score	Associated.Gene.Name	dbCluster	avgDiff
ENSG00000105369	0.964885	CD79A	1	1.81798
ENSG00000156738	0.954636	MS4A1	1	1.56196
ENSG00000104894	0.932734	CD37	1	1.19973
ENSG00000007312	0.894415	CD79B	1	1.26503
ENSG00000128218	0.856205	VPREB3	1	1.09114

## Sheet: Cluster 2
	Score	Associated.Gene.Name	dbCluster	avgDiff
ENSG00000167644	0.945341	C19orf33	2	1.69328
ENSG00000171345	0.933488	KRT19	2	2.16873
ENSG00000170421	0.930577	KRT8	2	2.46638
ENSG00000197956	0.923729	S100A6	2	2.25647
ENSG00000163435	0.923302	ELF3	2	1.84463
ENSG00000165949	0.920504	IFI27	2	2.76642
ENSG00000163993	0.916209	S100P	2	2.23425
ENSG00000111057	0.913612	KRT18	2	2.56027
ENSG00000110492	0.90153	MDK	2	1.68684
ENSG00000267795	0.899432	SMIM22	2	1.1653
ENSG00000189143	0.898172	CLDN4	2	1.68361
ENSG00000127324	0.888762	TSPAN8	2	2.09629
ENSG00000106541	0.885797	AGR2	2	1.99519
ENSG00000089356	0.882916	FXYD3	2	1.57159
ENSG00000120306	0.876475	CYSTM1	2	1.5624
ENSG00000185499	0.87577	MUC1	2	1.42452
ENSG00000189334	0.870376	S100A14	2	1.28695
ENSG00000124107	0.867874	SLPI	2	1.85754
ENSG00000119888	0.864661	EPCAM	2	1.37976
ENSG00000148346	0.863541	LCN2	2	2.32077
ENSG00000164266	0.862126	SPINK1	2	1.30573
ENSG00000196188	0.853483	CTSE	2	1.33852
ENSG00000125534	0.853149	PPDPF	2	1.14567
ENSG00000171747	0.847349	LGALS4	2	1.15086
ENSG00000084207	0.840552	GSTP1	2	1.21328
ENSG00000135480	0.838754	KRT7	2	1.9612
ENSG00000160182	0.833667	TFF1	2	2.38448
ENSG00000175416	0.83358	CLTB	2	1.31473
ENSG00000175793	0.830848	SFN	2	1.03621
ENSG00000169908	0.828731	TM4SF1	2	1.50524
ENSG00000086548	0.826857	CEACAM6	2	1.35587
ENSG00000112378	0.819904	PERP	2	1.13975
ENSG00000188643	0.819618	S100A16	2	1.00634
ENSG00000066405	0.819569	CLDN18	2	1.28519
ENSG00000182718	0.81806	ANXA2	2	1.29236
ENSG00000102854	0.81736	MSLN	2	1.04672
ENSG00000117472	0.816246	TSPAN1	2	1.07585
ENSG00000147676	0.806706	MAL2	2	1.07083
ENSG00000184292	0.805714	TACSTD2	2	1.24863
ENSG00000173467	0.804466	AGR3	2	1.01417
ENSG00000169903	0.797709	TM4SF4	2	1.27906
ENSG00000106211	0.794168	HSPB1	2	1.05865
ENSG00000167642	0.791927	SPINT2	2	1.01365
ENSG00000162366	0.791308	PDZK1IP1	2	1.16317
ENSG00000160181	0.791058	TFF2	2	1.68174
ENSG00000197747	0.790793	S100A10	2	1.17945
ENSG00000160932	0.784531	LY6E	2	1.1086
ENSG00000168631	0.774523	DPCR1	2	1.53605
ENSG00000160180	0.773156	TFF3	2	2.04115
ENSG00000167653	0.734103	PSCA	2	1.63539
ENSG00000198786	0.729786	MT-ND5	2	1.22836
ENSG00000198763	0.723462	MT-ND2	2	1.33411
ENSG00000198727	0.704974	MT-CYB	2	1.39533
ENSG00000134193	0.704836	REG4	2	1.52356
ENSG00000198899	0.694747	MT-ATP6	2	1.22918
ENSG00000198888	0.674856	MT-ND1	2	1.24021
ENSG00000162896	0.672697	PIGR	2	1.47149
ENSG00000197353	0.668198	LYPD2	2	1.17081
ENSG00000198804	0.666389	MT-CO1	2	1.29334
ENSG00000198938	0.654464	MT-CO3	2	1.32774
ENSG00000198886	0.634135	MT-ND4	2	1.09818
ENSG00000198712	0.631211	MT-CO2	2	1.26565
ENSG00000198840	0.609908	MT-ND3	2	1.19316
ENSG00000118137	0.533308	APOA1	2	1.74898
ENSG00000110244	0.52975	APOA4	2	1.55401

## Sheet: Cluster 3
	Score	Associated.Gene.Name	dbCluster	avgDiff
ENSG00000011600	0.986026	TYROBP	3	2.11271
ENSG00000204472	0.985376	AIF1	3	1.92957
ENSG00000158869	0.969807	FCER1G	3	1.73725
ENSG00000087086	0.966775	FTL	3	1.95888
ENSG00000101439	0.958542	CST3	3	1.78308
ENSG00000233276	0.956668	GPX1	3	1.5615
ENSG00000119655	0.946603	NPC2	3	1.5416
ENSG00000204482	0.941459	LST1	3	1.25896
ENSG00000196126	0.940162	HLA-DRB1	3	1.9565
ENSG00000204287	0.935136	HLA-DRA	3	1.93517
ENSG00000197746	0.935109	PSAP	3	1.46301
ENSG00000030582	0.934111	GRN	3	1.32169
ENSG00000090382	0.915524	LYZ	3	2.21963
ENSG00000066336	0.915477	SPI1	3	1.01807
ENSG00000129226	0.913011	CD68	3	1.22067
ENSG00000110077	0.912828	MS4A6A	3	1.41054
ENSG00000167996	0.910788	FTH1	3	1.29803
ENSG00000164733	0.905816	CTSB	3	1.33156
ENSG00000170458	0.902375	CD14	3	1.58335
ENSG00000223865	0.901423	HLA-DPB1	3	1.78476
ENSG00000163131	0.901025	CTSS	3	1.11365
ENSG00000163563	0.900928	MNDA	3	1.09499
ENSG00000019582	0.893785	CD74	3	1.5321
ENSG00000231389	0.892763	HLA-DPA1	3	1.80526
ENSG00000025708	0.889373	TYMP	3	1.04266
ENSG00000163191	0.887786	S100A11	3	1.07355
ENSG00000204257	0.88777	HLA-DMA	3	1.13358
ENSG00000135821	0.868981	GLUL	3	1.05275
ENSG00000179344	0.865112	HLA-DQB1	3	1.41229
ENSG00000100097	0.851654	LGALS1	3	1.1483
ENSG00000130066	0.851319	SAT1	3	1.03171
ENSG00000198502	0.850838	HLA-DRB5	3	1.4984
ENSG00000011422	0.849559	PLAUR	3	1.12157
ENSG00000196735	0.838631	HLA-DQA1	3	1.46681
ENSG00000128245	0.81872	YWHAH	3	1.02146
ENSG00000203747	0.812577	FCGR3A	3	1.05908
ENSG00000163220	0.793539	S100A9	3	2.2405
ENSG00000117984	0.790595	CTSD	3	1.34876
ENSG00000173372	0.785923	C1QA	3	1.89597
ENSG00000159189	0.771399	C1QC	3	1.90748
ENSG00000173369	0.763341	C1QB	3	1.95169
ENSG00000143546	0.737887	S100A8	3	2.25774
ENSG00000130208	0.732559	APOC1	3	1.82846
ENSG00000006075	0.720531	CCL3	3	1.29894
ENSG00000130203	0.720063	APOE	3	2.18028
ENSG00000169429	0.682468	IL8	3	1.55055
ENSG00000085265	0.680285	FCN1	3	1.04129
ENSG00000118785	0.635313	SPP1	3	1.58078

## Sheet: Cluter 4
	Score	Associated.Gene.Name	dbCluster	avgDiff
ENSG00000008517	0.909737	IL32	4	1.83156
ENSG00000167286	0.893572	CD3D	4	1.48467
ENSG00000198851	0.870495	CD3E	4	1.21232
ENSG00000116824	0.861233	CD2	4	1.40465
ENSG00000152518	0.799998	ZFP36L2	4	1.04395
ENSG00000161570	0.781238	CCL5	4	2.13615
ENSG00000168685	0.780609	IL7R	4	1.2404
ENSG00000173762	0.766077	CD7	4	1.10293
ENSG00000110848	0.754528	CD69	4	1.06501
ENSG00000145649	0.716048	GZMA	4	1.20156
ENSG00000111796	0.708329	KLRB1	4	1.45986
ENSG00000105374	0.667107	NKG7	4	1.29168
ENSG00000113088	0.653637	GZMK	4	1.10649
ENSG00000115523	0.556019	GNLY	4	1.18003

## Sheet: Cluster 5
	Score	Associated.Gene.Name	dbCluster	avgDiff
ENSG00000101335	0.99553	MYL9	5	2.58488
ENSG00000122786	0.993392	CALD1	5	2.35758
ENSG00000163453	0.992984	IGFBP7	5	3.43936
ENSG00000152583	0.986059	SPARCL1	5	2.58916
ENSG00000148671	0.980865	ADIRF	5	2.74657
ENSG00000109610	0.974972	SOD3	5	1.88364
ENSG00000149591	0.974485	TAGLN	5	3.26657
ENSG00000198467	0.973227	TPM2	5	2.05529
ENSG00000142089	0.969006	IFITM3	5	1.74435
ENSG00000107796	0.968794	ACTA2	5	3.00687
ENSG00000141753	0.945794	IGFBP4	5	1.5603
ENSG00000113140	0.939422	SPARC	5	1.86015
ENSG00000125868	0.939102	DSTN	5	1.61752
ENSG00000142173	0.937402	COL6A2	5	1.33378
ENSG00000182492	0.936866	BGN	5	1.74203
ENSG00000111341	0.936582	MGP	5	1.99162
ENSG00000140545	0.935722	MFGE8	5	1.49027
ENSG00000142910	0.932138	TINAGL1	5	1.42205
ENSG00000175899	0.928306	A2M	5	1.31743
ENSG00000167641	0.924586	PPP1R14A	5	1.33284
ENSG00000117519	0.922973	CNN3	5	1.26232
ENSG00000109472	0.920755	CPE	5	1.34846
ENSG00000125148	0.920583	MT2A	5	2.17223
ENSG00000189129	0.918421	PLAC9	5	1.12628
ENSG00000170955	0.918375	PRKCDBP	5	1.31658
ENSG00000183722	0.915468	LHFP	5	1.23155
ENSG00000149131	0.910034	SERPING1	5	1.22841
ENSG00000105974	0.907116	CAV1	5	1.34722
ENSG00000131711	0.905414	MAP1B	5	1.07758
ENSG00000102804	0.904545	TSC22D1	5	1.69933
ENSG00000198832	0.902152	SELM	5	1.18813
ENSG00000143248	0.900371	RGS5	5	2.67695
ENSG00000160789	0.900074	LMNA	5	1.15886
ENSG00000177469	0.89661	PTRF	5	1.06897
ENSG00000113721	0.893355	PDGFRB	5	1.23925
ENSG00000140416	0.89291	TPM1	5	1.34625
ENSG00000159403	0.885767	C1R	5	1.22092
ENSG00000182871	0.883514	COL18A1	5	1.17491
ENSG00000154734	0.88335	ADAMTS1	5	1.32602
ENSG00000187479	0.880474	C11orf96	5	1.54776
ENSG00000065534	0.87945	MYLK	5	1.10227
ENSG00000175183	0.872304	CSRP2	5	1.28716
ENSG00000106211	0.866167	HSPB1	5	1.09768
ENSG00000169715	0.862822	MT1E	5	1.30359
ENSG00000115461	0.855507	IGFBP5	5	1.97056
ENSG00000185633	0.854214	NDUFA4L2	5	1.72905
ENSG00000164692	0.853509	COL1A2	5	1.00169
ENSG00000103196	0.845748	CRISPLD2	5	1.07782
ENSG00000117318	0.844595	ID3	5	1.39056
ENSG00000100234	0.841834	TIMP3	5	1.10977
ENSG00000139289	0.837241	PHLDA1	5	1.18722
ENSG00000166741	0.836481	NNMT	5	1.04157
ENSG00000102265	0.835523	TIMP1	5	1.01848
ENSG00000184489	0.829261	PTP4A3	5	1.07736
ENSG00000182326	0.818549	C1S	5	1.0548
ENSG00000159713	0.81358	TPPP3	5	1.02656
ENSG00000133392	0.806234	MYH11	5	1.01542
ENSG00000158859	0.802796	ADAMTS4	5	1.45291
ENSG00000205364	0.801183	MT1M	5	1.47907
ENSG00000170323	0.71227	FABP4	5	1.38354
ENSG00000154096	0.711303	THY1	5	1.07464
ENSG00000187193	0.71119	MT1X	5	1.02377
ENSG00000142871	0.694125	CYR61	5	1.17667
ENSG00000118523	0.682234	CTGF	5	1.01616
ENSG00000205362	0.677598	MT1A	5	1.16541
ENSG00000108691	0.607006	CCL2	5	1.65394
ENSG00000136244	0.58598	IL6	5	1.53632

## Sheet: Cluster 6
	Score	Associated.Gene.Name	dbCluster	avgDiff
ENSG00000142789	0.999977	CELA3A	6	4.8851
ENSG00000168928	0.999976	CTRB2	6	5.82327
ENSG00000162438	0.999925	CTRC	6	3.9515
ENSG00000168925	0.999836	CTRB1	6	4.71752
ENSG00000172023	0.99979	REG1B	6	4.2447
ENSG00000010438	0.999775	PRSS3	6	4.50016
ENSG00000204983	0.999775	PRSS1	6	5.40325
ENSG00000153002	0.999571	CPB1	6	4.59024
ENSG00000115386	0.999003	REG1A	6	4.71599
ENSG00000164266	0.998238	SPINK1	6	4.25474
ENSG00000158516	0.997701	CPA2	6	3.18699
ENSG00000170890	0.997542	PLA2G1B	6	3.70638
ENSG00000091704	0.992792	CPA1	6	3.948
ENSG00000219073	0.990887	CELA3B	6	3.61211
ENSG00000170835	0.986613	CEL	6	2.69452
ENSG00000187021	0.984476	PNLIPRP1	6	2.10051
ENSG00000137392	0.982674	CLPS	6	4.0601
ENSG00000167748	0.96555	KLK1	6	1.9966
ENSG00000179751	0.961606	SYCN	6	3.18089
ENSG00000172016	0.951373	REG3A	6	3.83563
ENSG00000169347	0.946759	GP2	6	2.59003
ENSG00000143954	0.942868	REG3G	6	1.91792
ENSG00000175535	0.933632	PNLIP	6	3.25044
ENSG00000106538	0.928584	RARRES2	6	1.28848
ENSG00000129538	0.921451	RNASE1	6	1.15415
ENSG00000141086	0.90819	CTRL	6	1.51198
ENSG00000171766	0.901996	GATM	6	1.07394
ENSG00000142615	0.885416	CELA2A	6	2.42418
ENSG00000125144	0.873349	MT1G	6	1.33629
ENSG00000215704	0.838762	CELA2B	6	1.68098
ENSG00000243480	0.832405	AMY2A	6	2.62832

## Sheet: Cluster 7
	Score	Associated.Gene.Name	dbCluster	avgDiff
ENSG00000164692	0.992055	COL1A2	7	3.23258
ENSG00000011465	0.988269	DCN	7	3.29443
ENSG00000182326	0.988129	C1S	7	2.29381
ENSG00000108821	0.987138	COL1A1	7	3.44509
ENSG00000139329	0.982501	LUM	7	3.76634
ENSG00000142173	0.978301	COL6A2	7	2.20795
ENSG00000113140	0.977298	SPARC	7	2.59245
ENSG00000168542	0.97522	COL3A1	7	3.09869
ENSG00000159403	0.974962	C1R	7	2.32711
ENSG00000132386	0.968807	SERPINF1	7	2.11461
ENSG00000122786	0.961086	CALD1	7	1.79582
ENSG00000149131	0.958437	SERPING1	7	1.54939
ENSG00000111341	0.953238	MGP	7	2.89414
ENSG00000077942	0.94989	FBLN1	7	2.34736
ENSG00000142156	0.945748	COL6A1	7	1.65601
ENSG00000106333	0.945737	PCOLCE	7	1.49172
ENSG00000091986	0.945029	CCDC80	7	1.95952
ENSG00000163453	0.941994	IGFBP7	7	2.63752
ENSG00000141753	0.941206	IGFBP4	7	1.58765
ENSG00000163359	0.941154	COL6A3	7	1.51255
ENSG00000166741	0.934784	NNMT	7	1.68967
ENSG00000163430	0.93158	FSTL1	7	1.45558
ENSG00000087245	0.931519	MMP2	7	1.69463
ENSG00000162576	0.928869	MXRA8	7	1.21958
ENSG00000106538	0.925949	RARRES2	7	1.52983
ENSG00000068697	0.919626	LAPTM4A	7	1.11161
ENSG00000106624	0.91918	AEBP1	7	1.43174
ENSG00000142089	0.91907	IFITM3	7	1.32833
ENSG00000108679	0.917849	LGALS3BP	7	1.19719
ENSG00000102265	0.915464	TIMP1	7	1.60511
ENSG00000154096	0.9112	THY1	7	1.29684
ENSG00000152583	0.894722	SPARCL1	7	1.43579
ENSG00000159674	0.892357	SPON2	7	1.22511
ENSG00000182492	0.890961	BGN	7	2.02908
ENSG00000142871	0.889224	CYR61	7	2.06596
ENSG00000189058	0.886063	APOD	7	3.13864
ENSG00000143387	0.883815	CTSK	7	1.12677
ENSG00000160789	0.88323	LMNA	7	1.7707
ENSG00000158747	0.875967	NBL1	7	1.20885
ENSG00000214548	0.874539	MEG3	7	1.15225
ENSG00000166482	0.874532	MFAP4	7	1.51996
ENSG00000145423	0.873313	SFRP2	7	2.71627
ENSG00000000971	0.870474	CFH	7	1.11076
ENSG00000149257	0.869198	SERPINH1	7	1.09427
ENSG00000148180	0.867209	GSN	7	1.94381
ENSG00000134531	0.86242	EMP1	7	1.68514
ENSG00000163520	0.861411	FBLN2	7	1.31806
ENSG00000100234	0.859768	TIMP3	7	1.19449
ENSG00000115380	0.859367	EFEMP1	7	1.43245
ENSG00000101335	0.859249	MYL9	7	1.16087
ENSG00000164932	0.85895	CTHRC1	7	1.80639
ENSG00000166147	0.851339	FBN1	7	1.00144
ENSG00000115461	0.849141	IGFBP5	7	1.62419
ENSG00000106819	0.848989	ASPN	7	1.45165
ENSG00000109472	0.847554	CPE	7	1.09597
ENSG00000164949	0.832458	GEM	7	1.18349
ENSG00000198467	0.832135	TPM2	7	1.02922
ENSG00000118523	0.831591	CTGF	7	1.86164
ENSG00000167779	0.830252	IGFBP6	7	1.41793
ENSG00000115414	0.82912	FN1	7	1.10033
ENSG00000104368	0.824506	PLAT	7	1.00004
ENSG00000123610	0.82209	TNFAIP6	7	1.40229
ENSG00000101955	0.796603	SRPX	7	1.14144
ENSG00000106483	0.796305	SFRP4	7	1.66503
ENSG00000120885	0.788515	CLU	7	1.78732
ENSG00000125148	0.78448	MT2A	7	1.84776
ENSG00000149591	0.782828	TAGLN	7	1.4828
ENSG00000107562	0.780028	CXCL12	7	1.08866
ENSG00000125730	0.778667	C3	7	1.43604
ENSG00000107317	0.776868	PTGDS	7	2.03824
ENSG00000112936	0.757611	C7	7	1.56716
ENSG00000136997	0.754346	MYC	7	1.18104
ENSG00000107796	0.74256	ACTA2	7	1.28322
ENSG00000133110	0.741457	POSTN	7	1.55468
ENSG00000118849	0.740722	RARRES1	7	1.04229
ENSG00000143196	0.738899	DPT	7	1.12813
ENSG00000146674	0.729082	IGFBP3	7	1.12637
ENSG00000123358	0.726372	NR4A1	7	1.06708
ENSG00000105509	0.710525	HAS1	7	1.88935
ENSG00000145824	0.705258	CXCL14	7	1.64596
ENSG00000197614	0.702269	MFAP5	7	1.318
ENSG00000108691	0.70187	CCL2	7	1.43163
ENSG00000099953	0.690124	MMP11	7	1.87279
ENSG00000197766	0.679632	CFD	7	3.08098
ENSG00000188257	0.672625	PLA2G2A	7	2.20228
ENSG00000081041	0.635935	CXCL2	7	1.1144

## Sheet: Cluster 8
	Score	Associated.Gene.Name	dbCluster	avgDiff
ENSG00000137673	0.965532	MMP7	8	2.56589
ENSG00000196975	0.961709	ANXA4	8	2.39321
ENSG00000170421	0.961645	KRT8	8	1.75084
ENSG00000111057	0.956655	KRT18	8	1.59921
ENSG00000163435	0.950224	ELF3	8	1.47296
ENSG00000169908	0.949969	TM4SF1	8	1.40912
ENSG00000149131	0.949514	SERPING1	8	2.12519
ENSG00000164825	0.948717	DEFB1	8	1.94597
ENSG00000134873	0.944272	CLDN10	8	1.48198
ENSG00000085063	0.943891	CD59	8	1.39766
ENSG00000114115	0.943806	RBP1	8	1.20263
ENSG00000120885	0.936265	CLU	8	2.48565
ENSG00000119888	0.934872	EPCAM	8	1.27125
ENSG00000001626	0.93119	CFTR	8	1.32122
ENSG00000137731	0.92786	FXYD2	8	2.43611
ENSG00000163453	0.917545	IGFBP7	8	1.17095
ENSG00000140416	0.91735	TPM1	8	1.46363
ENSG00000143153	0.90684	ATP1B1	8	1.24374
ENSG00000163399	0.906771	ATP1A1	8	1.3932
ENSG00000115386	0.903376	REG1A	8	2.20322
ENSG00000080493	0.901907	SLC4A4	8	1.30035
ENSG00000184292	0.900053	TACSTD2	8	1.35252
ENSG00000142089	0.894313	IFITM3	8	1.01708
ENSG00000118785	0.89397	SPP1	8	2.23005
ENSG00000109610	0.889815	SOD3	8	1.11139
ENSG00000171766	0.885086	GATM	8	1.02561
ENSG00000188488	0.881744	SERPINA5	8	1.09934
ENSG00000197249	0.878049	SERPINA1	8	1.90257
ENSG00000235162	0.870016	C12orf75	8	1.0531
ENSG00000138079	0.862059	SLC3A1	8	1.24858
ENSG00000114315	0.861569	HES1	8	1.21327
ENSG00000125730	0.857727	C3	8	1.05161
ENSG00000106927	0.838459	AMBP	8	1.20931
ENSG00000148346	0.811183	LCN2	8	1.59196
ENSG00000106211	0.805315	HSPB1	8	1.00223
ENSG00000102837	0.797797	OLFM4	8	1.93173
ENSG00000271043	0.751628	MTRNR2L2	8	1.00101
ENSG00000163739	0.712854	CXCL1	8	1.00905
ENSG00000243709	0.698838	LEFTY1	8	1.07475
ENSG00000164266	0.68734	SPINK1	8	1.6122
ENSG00000012223	0.610838	LTF	8	1.01109
ENSG00000172016	0.585126	REG3A	8	1.27912

## Sheet: Cluster 9
	Score	Associated.Gene.Name	dbCluster	avgDiff
ENSG00000170476	0.99984	MZB1	9	2.93266
ENSG00000180879	0.99961	SSR4	9	2.76382
ENSG00000132465	0.996869	IGJ	9	5.75855
ENSG00000134285	0.985132	FKBP11	9	2.07201
ENSG00000254709	0.980062	IGLL5	9	5.57462
ENSG00000099958	0.977781	DERL3	9	2.44562
ENSG00000100219	0.968877	XBP1	9	2.28198
ENSG00000173486	0.967473	FKBP2	9	1.49271
ENSG00000166562	0.955303	SEC11C	9	1.51884
ENSG00000123131	0.934832	PRDX4	9	1.40851
ENSG00000051108	0.92707	HERPUD1	9	1.50844
ENSG00000166598	0.924043	HSP90B1	9	1.33782
ENSG00000118363	0.909915	SPCS2	9	1.10959
ENSG00000129128	0.900783	SPCS3	9	1.04513
ENSG00000135916	0.885615	ITM2C	9	1.30526
ENSG00000048462	0.883698	TNFRSF17	9	1.0391
ENSG00000105369	0.883693	CD79A	9	1.16362
ENSG00000102096	0.881204	PIM2	9	1.20984
ENSG00000253701	0.797302	AL928768.3	9	1.17255
ENSG00000154099	0.582628	DNAAF1	9	1.03667

## Sheet: Cluster 10
	Score	Associated.Gene.Name	dbCluster	avgDiff
ENSG00000185507	0.997578	IRF7	10	2.24308
ENSG00000100453	0.997276	GZMB	10	3.05789
ENSG00000140968	0.969859	IRF8	10	1.94554
ENSG00000239961	0.969197	LILRA4	10	1.58275
ENSG00000135916	0.963147	ITM2C	10	1.59414
ENSG00000106803	0.961423	SEC61B	10	1.21834
ENSG00000106537	0.9551	TSPAN13	10	1.29536
ENSG00000166428	0.952428	PLD4	10	1.51172
ENSG00000235162	0.950955	C12orf75	10	1.46874
ENSG00000173457	0.947002	PPP1R14B	10	1.5327
ENSG00000169583	0.945167	CLIC3	10	1.54065
ENSG00000196628	0.93562	TCF4	10	1.26001
ENSG00000185291	0.933604	IL3RA	10	1.1037
ENSG00000051108	0.92563	HERPUD1	10	1.29262
ENSG00000142192	0.924941	APP	10	1.13577
ENSG00000145287	0.921154	PLAC8	10	1.32797
ENSG00000162144	0.911489	CYB561A3	10	1.01899
ENSG00000184709	0.909345	LRRC26	10	1.04457
ENSG00000186810	0.905567	CXCR3	10	1.18444
ENSG00000132386	0.904626	SERPINF1	10	1.08454
ENSG00000169508	0.892632	GPR183	10	1.30499
ENSG00000148154	0.883589	UGCG	10	1.12298
ENSG00000152492	0.881446	CCDC50	10	1.00628
ENSG00000116741	0.831588	RGS2	10	1.318
ENSG00000105426	0.799762	PTPRS	10	1.02686
ENSG00000100721	0.797189	TCL1A	10	1.59559
ENSG00000107317	0.76289	PTGDS	10	2.51146

[truncated: 5 more sheets: Cluster 11, Cluster 12, Cluster 13, Cluster 14, Cluster 15]
