# Supplementary material for: Cross-Species Single-Cell Analysis of Pancreatic Ductal Adenocarcinoma Reveals Antigen-Presenting Cancer-Associated Fibroblasts
Source: Oxford University Press journal article supplement (doi:10.1158/2159-8290.cd-19-0094), 2019-06-13
Supplement: 21598290cd190094-sup-215864_2_supp_5552224_ps91bp.xlsx [file 21598290cd190094-sup-215864_2_supp_5552224_ps91bp.xlsx]

## Sheet: Cluster 1
	Score	Associated.Gene.Name	dbCluster	avgDiff
ENSG00000165949	0.927571	IFI27	1	2.65602
ENSG00000163993	0.951055	S100P	1	2.53379
ENSG00000160182	0.826844	TFF1	1	2.08178
ENSG00000168631	0.797735	DPCR1	1	1.83315
ENSG00000197956	0.907438	S100A6	1	1.81895
ENSG00000134193	0.717892	REG4	1	1.79714
ENSG00000167653	0.745205	PSCA	1	1.79029
ENSG00000066405	0.848315	CLDN18	1	1.58587
ENSG00000090382	0.790865	LYZ	1	1.57927
ENSG00000160181	0.795844	TFF2	1	1.48405
ENSG00000197353	0.680351	LYPD2	1	1.47958
ENSG00000089356	0.850185	FXYD3	1	1.43635
ENSG00000106541	0.826537	AGR2	1	1.37559
ENSG00000160180	0.746505	TFF3	1	1.3707
ENSG00000175416	0.815687	CLTB	1	1.30299
ENSG00000167644	0.880398	C19orf33	1	1.29742
ENSG00000196188	0.807222	CTSE	1	1.2147
ENSG00000187608	0.714019	ISG15	1	1.19237
ENSG00000185499	0.812291	MUC1	1	1.18987
ENSG00000196154	0.630258	S100A4	1	1.17675
ENSG00000215182	0.731124	MUC5AC	1	1.15827
ENSG00000086548	0.79016	CEACAM6	1	1.15161
ENSG00000135046	0.753946	ANXA1	1	1.14701
ENSG00000175793	0.815446	SFN	1	1.12318
ENSG00000117472	0.793972	TSPAN1	1	1.12045
ENSG00000034510	0.873119	TMSB10	1	1.11703
ENSG00000102854	0.799212	MSLN	1	1.0718
ENSG00000142669	0.812616	SH3BGRL3	1	1.06476
ENSG00000166920	0.731479	C15orf48	1	1.0633
ENSG00000135480	0.709106	KRT7	1	1.05759
ENSG00000011422	0.772666	PLAUR	1	1.02659
ENSG00000019102	0.80892	VSIG2	1	1.01885
ENSG00000196754	0.608762	S100A2	1	0.98791
ENSG00000147889	0.803323	CDKN2A	1	0.984145
ENSG00000126709	0.744665	IFI6	1	0.971963
ENSG00000189334	0.7611	S100A14	1	0.963017
ENSG00000147676	0.709073	MAL2	1	0.952022
ENSG00000137699	0.747651	TRIM29	1	0.935684
ENSG00000181019	0.780649	NQO1	1	0.935377
ENSG00000181649	0.773576	PHLDA2	1	0.906583
ENSG00000196878	0.774253	LAMB3	1	0.900494
ENSG00000237643	0.769587	RP11-462G2.1	1	0.893869
ENSG00000115009	0.676643	CCL20	1	0.891463
ENSG00000163191	0.80599	S100A11	1	0.888828
ENSG00000204983	0.518587	PRSS1	1	0.883238
ENSG00000110492	0.733693	MDK	1	0.870363
ENSG00000120306	0.722122	CYSTM1	1	0.868079
ENSG00000160932	0.752579	LY6E	1	0.864074
ENSG00000105388	0.689006	CEACAM5	1	0.863149
ENSG00000145287	0.74142	PLAC8	1	0.861307
ENSG00000197747	0.71057	S100A10	1	0.852566
ENSG00000013588	0.764231	GPRC5A	1	0.833513
ENSG00000109511	0.742606	ANXA10	1	0.824316
ENSG00000100300	0.772279	TSPO	1	0.808564
ENSG00000089327	0.801467	FXYD5	1	0.80686

## Sheet: Cluster 2
	Score	Associated.Gene.Name	dbCluster	avgDiff
ENSG00000118137	0.881954	APOA1	2	4.359
ENSG00000110244	0.86086	APOA4	2	4.12302
ENSG00000136872	0.944478	ALDOB	2	3.23982
ENSG00000162896	0.977723	PIGR	2	2.95537
ENSG00000163586	0.921811	FABP1	2	2.72147
ENSG00000110245	0.799396	APOC3	2	2.62353
ENSG00000114113	0.898834	RBP2	2	2.56725
ENSG00000233041	0.9454	PHGR1	2	2.53394
ENSG00000166825	0.929627	ANPEP	2	2.2774
ENSG00000154646	0.866667	TMPRSS15	2	2.17482
ENSG00000124253	0.804335	PCK1	2	2.11072
ENSG00000172016	0.61483	REG3A	2	2.05489
ENSG00000145384	0.933132	FABP2	2	2.02029
ENSG00000099834	0.918901	CDHR5	2	1.9282
ENSG00000090402	0.89405	SI	2	1.92311
ENSG00000084674	0.804876	APOB	2	1.80289
ENSG00000148671	0.862667	ADIRF	2	1.8005
ENSG00000165828	0.895044	PRAP1	2	1.68324
ENSG00000160868	0.748075	CYP3A4	2	1.63009
ENSG00000198763	0.921073	MT-ND2	2	1.60386
ENSG00000100170	0.90735	SLC5A1	2	1.55694
ENSG00000198888	0.923019	MT-ND1	2	1.54003
ENSG00000197888	0.84109	UGT2B17	2	1.49026
ENSG00000198840	0.909585	MT-ND3	2	1.43952
ENSG00000172831	0.877329	CES2	2	1.41682
ENSG00000095932	0.871052	C19orf77	2	1.41293
ENSG00000241224	0.755556	RP11-59E19.1	2	1.35076
ENSG00000115850	0.8	LCT	2	1.33848
ENSG00000187908	0.653987	DMBT1	2	1.31094
ENSG00000168955	0.827145	TM4SF20	2	1.30731
ENSG00000198804	0.905048	MT-CO1	2	1.26077
ENSG00000074276	0.784277	CDHR2	2	1.25661
ENSG00000086205	0.827392	FOLH1	2	1.20027
ENSG00000198712	0.899363	MT-CO2	2	1.19309
ENSG00000125144	0.598071	MT1G	2	1.1794
ENSG00000138823	0.79387	MTTP	2	1.16111
ENSG00000198938	0.885765	MT-CO3	2	1.15557
ENSG00000106404	0.817031	CLDN15	2	1.1459
ENSG00000198727	0.883648	MT-CYB	2	1.14164
ENSG00000197142	0.823262	ACSL5	2	1.11537
ENSG00000002726	0.74509	AOC1	2	1.09078
ENSG00000147872	0.768964	PLIN2	2	1.06378
ENSG00000213918	0.805325	DNASE1	2	1.05876
ENSG00000065154	0.774004	OAT	2	1.04778
ENSG00000091138	0.73774	SLC26A3	2	1.03324
ENSG00000196549	0.769807	MME	2	1.02739
ENSG00000198899	0.862981	MT-ATP6	2	1.02005
ENSG00000198886	0.866201	MT-ND4	2	1.01545
ENSG00000112818	0.744017	MEP1A	2	1.00263
ENSG00000163295	0.722013	ALPI	2	0.989703
ENSG00000088386	0.690834	SLC15A1	2	0.974017
ENSG00000100889	0.743824	PCK2	2	0.969244
ENSG00000060566	0.731883	CREB3L3	2	0.953467
ENSG00000139540	0.775136	SLC39A5	2	0.93726
ENSG00000131142	0.705258	CCL25	2	0.926735
ENSG00000198786	0.799618	MT-ND5	2	0.906459
ENSG00000079112	0.754935	CDH17	2	0.886989
ENSG00000166866	0.748465	MYO1A	2	0.875867
ENSG00000205358	0.604419	MT1H	2	0.874877
ENSG00000004799	0.7346	PDK4	2	0.864668
ENSG00000142484	0.758159	TM4SF5	2	0.847166
ENSG00000118094	0.692767	TREH	2	0.837076
ENSG00000076351	0.689845	SLC46A1	2	0.833456
ENSG00000007216	0.742222	SLC13A2	2	0.824376
ENSG00000255823	0.794948	MTRNR2L8	2	0.820516
ENSG00000141504	0.719145	SAT2	2	0.81471
ENSG00000118515	0.691941	SGK1	2	0.800468

## Sheet: Cluster 3
	Score	Associated.Gene.Name	dbCluster	avgDiff
ENSG00000118785	0.895098	SPP1	3	3.43194
ENSG00000137731	0.919726	FXYD2	3	2.44321
ENSG00000120885	0.903217	CLU	3	2.28189
ENSG00000149131	0.928257	SERPING1	3	2.04053
ENSG00000137673	0.896568	MMP7	3	1.87651
ENSG00000115386	0.854043	REG1A	3	1.79213
ENSG00000108691	0.724084	CCL2	3	1.76358
ENSG00000197249	0.86559	SERPINA1	3	1.75432
ENSG00000164825	0.906935	DEFB1	3	1.74688
ENSG00000163453	0.932667	IGFBP7	3	1.73575
ENSG00000168928	0.821596	CTRB2	3	1.71632
ENSG00000125730	0.909954	C3	3	1.55195
ENSG00000001626	0.92305	CFTR	3	1.51839
ENSG00000109610	0.896254	SOD3	3	1.42386
ENSG00000080493	0.881155	SLC4A4	3	1.42209
ENSG00000112096	0.885045	SOD2	3	1.40567
ENSG00000106927	0.827551	AMBP	3	1.39418
ENSG00000196975	0.873237	ANXA4	3	1.3878
ENSG00000114115	0.929172	RBP1	3	1.34602
ENSG00000138079	0.834177	SLC3A1	3	1.33261
ENSG00000188488	0.875537	SERPINA5	3	1.30945
ENSG00000100906	0.808554	NFKBIA	3	1.29262
ENSG00000243709	0.695146	LEFTY1	3	1.27031
ENSG00000012223	0.611931	LTF	3	1.25316
ENSG00000102837	0.751287	OLFM4	3	1.21701
ENSG00000171766	0.883446	GATM	3	1.21664
ENSG00000134873	0.873917	CLDN10	3	1.21516
ENSG00000240583	0.864452	AQP1	3	1.18023
ENSG00000019582	0.848146	CD74	3	1.17256
ENSG00000118523	0.730117	CTGF	3	1.14829
ENSG00000081041	0.736254	CXCL2	3	1.13899
ENSG00000163399	0.845288	ATP1A1	3	1.13382
ENSG00000172023	0.602807	REG1B	3	1.12028
ENSG00000159403	0.87117	C1R	3	1.10117
ENSG00000105825	0.736975	TFPI2	3	1.09935
ENSG00000182326	0.834883	C1S	3	1.09697
ENSG00000124875	0.672099	CXCL6	3	1.08181
ENSG00000115738	0.801349	ID2	3	1.07175
ENSG00000142789	0.70403	CELA3A	3	1.04829
ENSG00000163739	0.667306	CXCL1	3	1.04395
ENSG00000172016	0.585844	REG3A	3	1.02911
ENSG00000080293	0.846124	SCTR	3	1.00485
ENSG00000089220	0.868003	PEBP1	3	1.00363
ENSG00000099622	0.866984	CIRBP	3	0.982591
ENSG00000114315	0.780084	HES1	3	0.981097
ENSG00000185650	0.825579	ZFP36L1	3	0.976598
ENSG00000112312	0.766717	GMNN	3	0.971742
ENSG00000167552	0.776314	TUBA1A	3	0.971237
ENSG00000133639	0.837137	BTG1	3	0.960985
ENSG00000104723	0.828463	TUSC3	3	0.952981
ENSG00000026508	0.824836	CD44	3	0.951471
ENSG00000142871	0.735736	CYR61	3	0.944009
ENSG00000198417	0.83378	MT1F	3	0.943849
ENSG00000182871	0.836665	COL18A1	3	0.940271
ENSG00000179403	0.841528	VWA1	3	0.933931
ENSG00000131771	0.774868	PPP1R1B	3	0.930806
ENSG00000162692	0.770611	VCAM1	3	0.900043
ENSG00000117519	0.839347	CNN3	3	0.857309
ENSG00000136732	0.845896	GYPC	3	0.842026
ENSG00000154556	0.820891	SORBS2	3	0.841289
ENSG00000142192	0.827745	APP	3	0.838515
ENSG00000089009	0.86743	RPL6	3	0.832784
ENSG00000166741	0.64741	NNMT	3	0.824357
ENSG00000153002	0.685767	CPB1	3	0.816753
ENSG00000026025	0.641793	VIM	3	0.816642

## Sheet: Cluster 4
	Score	Associated.Gene.Name	dbCluster	avgDiff
ENSG00000096006	0.960366	CRISP3	4	2.99715
ENSG00000134827	0.956993	TCN1	4	2.87366
ENSG00000132703	0.94145	APCS	4	2.39777
ENSG00000132693	0.886432	CRP	4	2.39377
ENSG00000145321	0.913086	GC	4	1.8481
ENSG00000198848	0.924618	CES1	4	1.84433
ENSG00000115386	0.909068	REG1A	4	1.70206
ENSG00000196620	0.943223	UGT2B15	4	1.68461
ENSG00000007306	0.880171	CEACAM7	4	1.57331
ENSG00000196611	0.837434	MMP1	4	1.50909
ENSG00000164266	0.927631	SPINK1	4	1.48217
ENSG00000165272	0.941304	AQP3	4	1.41871
ENSG00000100079	0.911714	LGALS2	4	1.37508
ENSG00000008394	0.929564	MGST1	4	1.23554
ENSG00000117983	0.935465	MUC5B	4	1.1892
ENSG00000168209	0.870931	DDIT4	4	1.15075
ENSG00000197249	0.836506	SERPINA1	4	1.14157
ENSG00000106565	0.943722	TMEM176B	4	1.13671
ENSG00000140274	0.670428	DUOXA2	4	1.1174
ENSG00000134873	0.900452	CLDN10	4	1.10746
ENSG00000196975	0.893082	ANXA4	4	1.0847
ENSG00000196139	0.914997	AKR1C3	4	1.08463
ENSG00000176153	0.889916	GPX2	4	1.06676
ENSG00000135744	0.892659	AGT	4	1.05522
ENSG00000125968	0.785499	ID1	4	1.04764
ENSG00000169903	0.867495	TM4SF4	4	1.03065
ENSG00000137673	0.86273	MMP7	4	0.975907
ENSG00000110195	0.87819	FOLR1	4	0.967159
ENSG00000002933	0.90724	TMEM176A	4	0.96686
ENSG00000171560	0.669063	FGA	4	0.955789
ENSG00000143878	0.798015	RHOB	4	0.945793
ENSG00000166347	0.863263	CYB5A	4	0.941878
ENSG00000120129	0.836339	DUSP1	4	0.92403
ENSG00000148346	0.724524	LCN2	4	0.899059
ENSG00000171747	0.858878	LGALS4	4	0.850089
ENSG00000170345	0.800917	FOS	4	0.839985
ENSG00000171564	0.582121	FGB	4	0.832478
ENSG00000162344	0.627947	FGF19	4	0.824373
ENSG00000149131	0.839803	SERPING1	4	0.808025
