# Supplementary material for: Cross-Species Single-Cell Analysis of Pancreatic Ductal Adenocarcinoma Reveals Antigen-Presenting Cancer-Associated Fibroblasts
Source: Oxford University Press journal article supplement (doi:10.1158/2159-8290.cd-19-0094), 2019-06-13
Supplement: 21598290cd190094-sup-215864_2_supp_5552225_ps91bp.xlsx [file 21598290cd190094-sup-215864_2_supp_5552225_ps91bp.xlsx]

## Sheet: Cluster 1
	Score	Associated.Gene.Name	dbCluster	avgDiff
ENSG00000159189	0.948242	C1QC	1	2.15253
ENSG00000173372	0.939598	C1QA	1	1.90098
ENSG00000173369	0.937442	C1QB	1	2.11335
ENSG00000136156	0.848563	ITM2B	1	0.863925
ENSG00000019582	0.838564	CD74	1	0.733258
ENSG00000231389	0.802638	HLA-DPA1	1	0.745102
ENSG00000171659	0.797914	GPR34	1	0.878204
ENSG00000106565	0.7887	TMEM176B	1	0.808138
ENSG00000090104	0.78662	RGS1	1	1.2047
ENSG00000223865	0.783953	HLA-DPB1	1	0.647678
ENSG00000203747	0.780113	FCGR3A	1	0.959562
ENSG00000085662	0.779089	AKR1B1	1	0.659471
ENSG00000204287	0.778271	HLA-DRA	1	0.586139
ENSG00000109861	0.774947	CTSC	1	0.692618
ENSG00000204257	0.774598	HLA-DMA	1	0.531327
ENSG00000175899	0.771061	A2M	1	0.777203
ENSG00000242574	0.769158	HLA-DMB	1	0.605482
ENSG00000196126	0.768543	HLA-DRB1	1	0.562912
ENSG00000137491	0.76614	SLCO2B1	1	0.680196
ENSG00000182578	0.764772	CSF1R	1	0.629328
ENSG00000198502	0.762349	HLA-DRB5	1	0.596906
ENSG00000143226	0.759871	FCGR2A	1	0.70052
ENSG00000196735	0.750562	HLA-DQA1	1	0.621666
ENSG00000139679	0.748589	LPAR6	1	0.646773
ENSG00000125730	0.74643	C3	1	0.667159
ENSG00000095970	0.741702	TREM2	1	0.752461
ENSG00000179344	0.741662	HLA-DQB1	1	0.527504
ENSG00000002933	0.739668	TMEM176A	1	0.61585
ENSG00000139687	0.734967	RB1	1	0.573509
ENSG00000237541	0.732612	HLA-DQA2	1	0.712342
ENSG00000155130	0.732431	MARCKS	1	0.570664
ENSG00000130203	0.731741	APOE	1	0.557806
ENSG00000166927	0.731579	MS4A7	1	0.635331
ENSG00000110077	0.723312	MS4A6A	1	0.503401
ENSG00000051108	0.718914	HERPUD1	1	0.715866
ENSG00000171860	0.708371	C3AR1	1	0.514121
ENSG00000204103	0.707077	MAFB	1	0.593222
ENSG00000138449	0.701312	SLC40A1	1	0.799766
ENSG00000166428	0.68957	PLD4	1	0.578363
ENSG00000116774	0.68702	OLFML3	1	0.608826
ENSG00000124491	0.683575	F13A1	1	0.626077
ENSG00000122861	0.681635	PLAU	1	0.52114
ENSG00000167601	0.681445	AXL	1	0.588702
ENSG00000170458	0.678269	CD14	1	0.540416
ENSG00000177606	0.666243	JUN	1	0.664536
ENSG00000100979	0.648975	PLTP	1	0.589625
ENSG00000165457	0.633852	FOLR2	1	0.658482
ENSG00000267100	0.63032	ILF3-AS1	1	0.600107
ENSG00000090920	0.622071	FCGBP	1	0.808529
ENSG00000100600	0.617912	LGMN	1	0.626682
ENSG00000250722	0.615212	SEPP1	1	1.41616
ENSG00000129538	0.549214	RNASE1	1	0.78603

## Sheet: Cluster 2
	Score	Associated.Gene.Name	dbCluster	avgDiff
ENSG00000196154	0.817959	S100A4	2	0.919453
ENSG00000090382	0.816394	LYZ	2	1.05779
ENSG00000143546	0.810606	S100A8	2	2.65837
ENSG00000085265	0.807091	FCN1	2	1.7459
ENSG00000163220	0.803544	S100A9	2	2.28976
ENSG00000197956	0.80295	S100A6	2	0.820949
ENSG00000169442	0.763159	CD52	2	0.903045
ENSG00000038427	0.756947	VCAN	2	1.3018
ENSG00000102265	0.75396	TIMP1	2	1.54472
ENSG00000142227	0.730373	EMP3	2	0.664766
ENSG00000122862	0.723399	SRGN	2	0.657444
ENSG00000121552	0.710604	CSTA	2	0.644088
ENSG00000026508	0.699826	CD44	2	0.563972
ENSG00000182287	0.6878	AP1S2	2	0.584548
ENSG00000171051	0.672454	FPR1	2	0.542997
ENSG00000126759	0.664285	CFP	2	0.685505
ENSG00000196352	0.663165	CD55	2	0.818097
ENSG00000163221	0.657528	S100A12	2	1.31837
ENSG00000105835	0.655982	NAMPT	2	0.703153
ENSG00000137801	0.64835	THBS1	2	1.31378
ENSG00000076944	0.648036	STXBP2	2	0.609487
ENSG00000186407	0.643264	CD300E	2	0.581167
ENSG00000124882	0.633056	EREG	2	0.951242
ENSG00000104918	0.632391	RETN	2	0.908384
ENSG00000185201	0.62753	IFITM2	2	0.539843
ENSG00000112096	0.60961	SOD2	2	0.896596
ENSG00000142089	0.587156	IFITM3	2	0.505613
ENSG00000118503	0.579787	TNFAIP3	2	0.517441
ENSG00000257764	0.573548	RP11-1143G9.4	2	0.604728
ENSG00000125538	0.56827	IL1B	2	0.680117
ENSG00000128383	0.567055	APOBEC3A	2	0.575116
ENSG00000081041	0.553401	CXCL2	2	0.96592
ENSG00000163734	0.529744	CXCL3	2	0.790859
ENSG00000169429	0.522465	IL8	2	0.780879
ENSG00000102970	0.520484	CCL17	2	0.676983

## Sheet: Cluster 3
	Score	Associated.Gene.Name	dbCluster	avgDiff
ENSG00000160307	0.850133	S100B	3	2.33892
ENSG00000227507	0.890038	LTB	3	2.02262
ENSG00000103187	0.843819	COTL1	3	1.40123
ENSG00000158477	0.813494	CD1A	3	1.39948
ENSG00000158488	0.780245	CD1E	3	1.33998
ENSG00000158481	0.779668	CD1C	3	1.3283
ENSG00000135549	0.797629	PKIB	3	1.22625
ENSG00000125148	0.426659	MT2A	3	1.12293
ENSG00000115009	0.523903	CCL20	3	0.969052
ENSG00000187193	0.4521	MT1X	3	0.949091
ENSG00000180817	0.768591	PPA1	3	0.932415
ENSG00000164485	0.72329	IL22RA2	3	0.900513
ENSG00000148180	0.815207	GSN	3	0.895225
ENSG00000116031	0.672745	CD207	3	0.879483
ENSG00000104267	0.784943	CA2	3	0.855934
ENSG00000184009	0.85799	ACTG1	3	0.852289
ENSG00000179639	0.674844	FCER1A	3	0.848915
ENSG00000163734	0.520477	CXCL3	3	0.845073
ENSG00000164949	0.779861	GEM	3	0.833355
ENSG00000157303	0.79717	SUSD3	3	0.818771
ENSG00000149269	0.76852	PAK1	3	0.798405
ENSG00000165795	0.800685	NDRG2	3	0.774164
ENSG00000115414	0.470564	FN1	3	0.74965
ENSG00000160593	0.767211	AMICA1	3	0.745566
ENSG00000115386	0.60329	REG1A	3	0.741989
ENSG00000057608	0.787714	GDI2	3	0.741818
ENSG00000168928	0.625256	CTRB2	3	0.715484
ENSG00000132744	0.633792	ACY3	3	0.68649
ENSG00000101336	0.802807	HCK	3	0.675444
ENSG00000125753	0.753148	VASP	3	0.668778
ENSG00000020633	0.738982	RUNX3	3	0.656716
ENSG00000100292	0.410402	HMOX1	3	0.650664
ENSG00000064666	0.780974	CNN2	3	0.648065
ENSG00000145287	0.689854	PLAC8	3	0.642691
ENSG00000137193	0.7701	PIM1	3	0.642496
ENSG00000182853	0.484927	VMO1	3	0.63937
ENSG00000113648	0.771027	H2AFY	3	0.637379
ENSG00000204983	0.554138	PRSS1	3	0.636599
ENSG00000130592	0.748598	LSP1	3	0.626578
ENSG00000175567	0.758679	UCP2	3	0.622296
ENSG00000101335	0.781578	MYL9	3	0.607294
ENSG00000075624	0.800604	ACTB	3	0.602567
ENSG00000145936	0.785287	KCNMB1	3	0.597549
ENSG00000108798	0.756087	ABI3	3	0.596872
ENSG00000169567	0.777034	HINT1	3	0.596648
ENSG00000136167	0.745808	LCP1	3	0.593842
ENSG00000125144	0.51622	MT1G	3	0.588588
ENSG00000101608	0.794294	MYL12A	3	0.578339
ENSG00000167641	0.739121	PPP1R14A	3	0.568514
ENSG00000164543	0.762351	STK17A	3	0.558157
ENSG00000204482	0.768015	LST1	3	0.550959
ENSG00000170545	0.737477	SMAGP	3	0.54234
ENSG00000138185	0.699895	ENTPD1	3	0.535051
ENSG00000152229	0.755458	PSTPIP2	3	0.530594
ENSG00000166002	0.729041	SMCO4	3	0.526256
ENSG00000125868	0.722883	DSTN	3	0.525641
ENSG00000005022	0.724459	SLC25A5	3	0.525091
ENSG00000167642	0.714989	SPINT2	3	0.521955
ENSG00000110047	0.726415	EHD1	3	0.518931
ENSG00000159335	0.699794	PTMS	3	0.516639

## Sheet: Cluster 4
	Score	Associated.Gene.Name	dbCluster	avgDiff
ENSG00000160213	0.937549	CSTB	4	1.94087
ENSG00000118785	0.92882	SPP1	4	2.82384
ENSG00000117984	0.925121	CTSD	4	1.54967
ENSG00000087086	0.903953	FTL	4	1.20602
ENSG00000136235	0.89341	GPNMB	4	1.23084
ENSG00000126709	0.892265	IFI6	4	1.68138
ENSG00000165140	0.889917	FBP1	4	1.88235
ENSG00000160932	0.886081	LY6E	4	1.37592
ENSG00000130208	0.870763	APOC1	4	2.12731
ENSG00000163191	0.869217	S100A11	4	0.662852
ENSG00000149925	0.860431	ALDOA	4	0.878401
ENSG00000182718	0.856734	ANXA2	4	0.842517
ENSG00000135404	0.848152	CD63	4	0.70421
ENSG00000240972	0.845535	MIF	4	1.03518
ENSG00000135047	0.844337	CTSL	4	1.23537
ENSG00000148834	0.837442	GSTO1	4	0.78397
ENSG00000136810	0.837	TXN	4	0.900414
ENSG00000130203	0.833197	APOE	4	1.85615
ENSG00000176046	0.829607	NUPR1	4	2.03751
ENSG00000129226	0.827343	CD68	4	0.758192
ENSG00000100097	0.826205	LGALS1	4	0.821885
ENSG00000164733	0.824944	CTSB	4	0.819459
ENSG00000164687	0.824927	FABP5	4	1.19546
ENSG00000128524	0.823211	ATP6V1F	4	0.695123
ENSG00000131981	0.818683	LGALS3	4	0.928563
ENSG00000010278	0.817146	CD9	4	0.914184
ENSG00000019169	0.812046	MARCO	4	1.44414
ENSG00000187608	0.807996	ISG15	4	1.37145
ENSG00000137880	0.807163	GCHFR	4	1.21416
ENSG00000143198	0.80535	MGST3	4	0.694224
ENSG00000042493	0.799123	CAPG	4	0.691373
ENSG00000197747	0.798914	S100A10	4	0.810882
ENSG00000134333	0.788219	LDHA	4	0.850282
ENSG00000111669	0.78307	TPI1	4	0.641182
ENSG00000166920	0.780196	C15orf48	4	0.857341
ENSG00000224397	0.77707	RP11-290F20.3	4	0.688167
ENSG00000111640	0.775908	GAPDH	4	0.581418
ENSG00000102575	0.775441	ACP5	4	0.992901
ENSG00000135821	0.775135	GLUL	4	0.636412
ENSG00000125534	0.766871	PPDPF	4	0.571105
ENSG00000198668	0.754852	CALM1	4	0.558928
ENSG00000142669	0.751303	SH3BGRL3	4	0.524538
ENSG00000067225	0.749929	PKM	4	0.594484
ENSG00000197956	0.748294	S100A6	4	0.535906
ENSG00000117450	0.744102	PRDX1	4	0.526553
ENSG00000165949	0.739817	IFI27	4	1.7295
ENSG00000074800	0.739491	ENO1	4	0.581338
ENSG00000163956	0.735047	LRPAP1	4	0.554748
ENSG00000185896	0.732942	LAMP1	4	0.500683
ENSG00000135929	0.73043	CYP27A1	4	0.647253
ENSG00000104951	0.728879	IL4I1	4	0.690465
ENSG00000105223	0.727973	PLD3	4	0.867129
ENSG00000147872	0.7219	PLIN2	4	0.919045
ENSG00000107798	0.718468	LIPA	4	0.675454
ENSG00000157601	0.717511	MX1	4	0.587168
ENSG00000136689	0.715767	IL1RN	4	1.1752
ENSG00000183019	0.713163	C19orf59	4	0.705066
ENSG00000132965	0.708972	ALOX5AP	4	0.587604
ENSG00000197930	0.708505	ERO1L	4	0.513831
ENSG00000122641	0.704705	INHBA	4	0.921896
ENSG00000008394	0.701157	MGST1	4	0.619782
ENSG00000102760	0.70046	RGCC	4	0.764429
ENSG00000146070	0.699647	PLA2G7	4	0.530226
ENSG00000169439	0.696454	SDC2	4	0.671292
ENSG00000115414	0.695193	FN1	4	0.809634
ENSG00000129538	0.695121	RNASE1	4	1.04934
ENSG00000169442	0.688976	CD52	4	0.512296
ENSG00000121769	0.686753	FABP3	4	0.621016
ENSG00000197766	0.681298	CFD	4	0.532051
ENSG00000175445	0.665898	LPL	4	0.518441
ENSG00000123689	0.664889	G0S2	4	0.597924
ENSG00000134531	0.663805	EMP1	4	0.553056
ENSG00000198848	0.654862	CES1	4	0.549925
ENSG00000133048	0.641923	CHI3L1	4	1.03809
ENSG00000125148	0.640497	MT2A	4	0.533589
ENSG00000108691	0.638552	CCL2	4	2.03531
ENSG00000108688	0.622547	CCL7	4	0.815682
ENSG00000006074	0.602063	CCL18	4	0.913008
ENSG00000100985	0.561312	MMP9	4	0.505396
ENSG00000137673	0.527965	MMP7	4	0.686961

## Sheet: Cluster 5
	Score	Associated.Gene.Name	dbCluster	avgDiff
ENSG00000140968	0.975828	IRF8	5	1.91743
ENSG00000118292	0.975467	C1orf54	5	1.60466
ENSG00000106066	0.950313	CPVL	5	1.55312
ENSG00000197992	0.96879	CLEC9A	5	1.54674
ENSG00000112335	0.99366	SNX3	5	1.54526
ENSG00000100079	0.957509	LGALS2	5	1.53135
ENSG00000085719	0.955749	CPNE3	5	1.37601
ENSG00000101439	0.953865	CST3	5	1.33412
ENSG00000131203	0.945526	IDO1	5	1.31175
ENSG00000163687	0.822847	DNASE1L3	5	1.24069
ENSG00000160789	0.801279	LMNA	5	1.15894
ENSG00000168394	0.917245	TAP1	5	1.11603
ENSG00000136810	0.771579	TXN	5	0.947954
ENSG00000128815	0.934311	WDFY4	5	0.908291
ENSG00000158710	0.901219	TAGLN2	5	0.906368
ENSG00000160307	0.776798	S100B	5	0.883748
ENSG00000130592	0.913403	LSP1	5	0.873383
ENSG00000138744	0.873439	NAAA	5	0.872823
ENSG00000241106	0.929041	HLA-DOB	5	0.872388
ENSG00000184292	0.777572	TACSTD2	5	0.85946
ENSG00000240065	0.865387	PSMB9	5	0.839295
ENSG00000182853	0.66733	VMO1	5	0.831633
ENSG00000115738	0.796306	ID2	5	0.805879
ENSG00000084207	0.883269	GSTP1	5	0.802417
ENSG00000110092	0.845381	CCND1	5	0.791189
ENSG00000173848	0.853442	NET1	5	0.776456
ENSG00000176788	0.845622	BASP1	5	0.755995
ENSG00000187164	0.886622	KIAA1598	5	0.753018
ENSG00000100243	0.851447	CYB5R3	5	0.752409
ENSG00000102760	0.832081	RGCC	5	0.750091
ENSG00000136490	0.86368	LIMD2	5	0.748016
ENSG00000175567	0.861209	UCP2	5	0.747779
ENSG00000187109	0.854718	NAP1L1	5	0.732957
ENSG00000184009	0.849778	ACTG1	5	0.731233
ENSG00000182985	0.86839	CADM1	5	0.719904
ENSG00000019582	0.883345	CD74	5	0.714998
ENSG00000231389	0.854005	HLA-DPA1	5	0.712099
ENSG00000113387	0.876517	SUB1	5	0.70975
ENSG00000123685	0.881707	BATF3	5	0.700686
ENSG00000223865	0.83457	HLA-DPB1	5	0.700169
ENSG00000132334	0.799099	PTPRE	5	0.694085
ENSG00000122025	0.835442	FLT3	5	0.685811
ENSG00000180817	0.821659	PPA1	5	0.684188
ENSG00000179344	0.818494	HLA-DQB1	5	0.676497
ENSG00000234745	0.888911	HLA-B	5	0.674606
ENSG00000077984	0.752028	CST7	5	0.67009
ENSG00000075624	0.877695	ACTB	5	0.666454
ENSG00000096092	0.869528	TMEM14A	5	0.665018
ENSG00000103043	0.849038	VAC14	5	0.660132
ENSG00000120875	0.709986	DUSP4	5	0.651135
ENSG00000187239	0.838868	FNBP1	5	0.643055
ENSG00000205542	0.91938	TMSB4X	5	0.633023
ENSG00000026751	0.849871	SLAMF7	5	0.632216
ENSG00000109684	0.848753	CLNK	5	0.629441
ENSG00000197747	0.804663	S100A10	5	0.62748
ENSG00000100628	0.800554	ASB2	5	0.624288
ENSG00000196735	0.773685	HLA-DQA1	5	0.621351
ENSG00000197043	0.841635	ANXA6	5	0.61123
ENSG00000076662	0.831414	ICAM3	5	0.605471
ENSG00000026025	0.783135	VIM	5	0.599034
ENSG00000204525	0.80007	HLA-C	5	0.595302
ENSG00000197629	0.795766	MPEG1	5	0.59198
ENSG00000173272	0.79933	MZT2A	5	0.580011
ENSG00000143420	0.801136	ENSA	5	0.579004
ENSG00000167711	0.796131	SERPINF2	5	0.578765
ENSG00000143110	0.767822	C1orf162	5	0.559802
ENSG00000116667	0.815029	C1orf21	5	0.552971
ENSG00000127951	0.780645	FGL2	5	0.552499
ENSG00000064666	0.803747	CNN2	5	0.54397
ENSG00000197061	0.590739	HIST1H4C	5	0.536534
ENSG00000137309	0.772491	HMGA1	5	0.528243
ENSG00000136167	0.775779	LCP1	5	0.527449
ENSG00000114942	0.751347	EEF1B2	5	0.526748
ENSG00000174500	0.766709	GCSAM	5	0.521239
ENSG00000118508	0.737914	RAB32	5	0.518789
ENSG00000214022	0.821304	REPIN1	5	0.514926
ENSG00000125354	0.812312	SEPT6	5	0.510976
ENSG00000023445	0.723102	BIRC3	5	0.510317
ENSG00000102096	0.710268	PIM2	5	0.508801
ENSG00000186265	0.828983	BTLA	5	0.503839

## Sheet: Cluster 6
	Score	Associated.Gene.Name	dbCluster	avgDiff
ENSG00000160307	0.99156	S100B	6	3.1592
ENSG00000232629	0.997626	HLA-DQB2	6	3.04574
ENSG00000158477	0.998536	CD1A	6	2.77369
ENSG00000227507	0.978885	LTB	6	2.50721
ENSG00000179639	0.974528	FCER1A	6	2.04286
ENSG00000184292	0.957217	TACSTD2	6	1.99725
ENSG00000116031	0.955804	CD207	6	1.99563
ENSG00000165795	0.991977	NDRG2	6	1.7785
ENSG00000158488	0.953704	CD1E	6	1.6279
ENSG00000148180	0.978078	GSN	6	1.48717
ENSG00000163106	0.949522	HPGDS	6	1.3261
ENSG00000090920	0.87422	FCGBP	6	1.2325
ENSG00000100558	0.913249	PLEK2	6	1.22714
ENSG00000135549	0.922355	PKIB	6	1.20005
ENSG00000237541	0.89554	HLA-DQA2	6	1.14998
ENSG00000155366	0.910176	RHOC	6	1.10378
ENSG00000164485	0.861942	IL22RA2	6	1.10061
ENSG00000057608	0.951427	GDI2	6	1.08456
ENSG00000158481	0.840039	CD1C	6	0.99931
ENSG00000204482	0.94996	LST1	6	0.989574
ENSG00000125753	0.909754	VASP	6	0.986014
ENSG00000124785	0.889083	NRN1	6	0.975656
ENSG00000108639	0.897258	SYNGR2	6	0.966449
ENSG00000101336	0.899239	HCK	6	0.957248
ENSG00000116824	0.848748	CD2	6	0.957016
ENSG00000132386	0.864056	SERPINF1	6	0.947005
ENSG00000182578	0.885408	CSF1R	6	0.919652
ENSG00000145936	0.884919	KCNMB1	6	0.917482
ENSG00000167601	0.767895	AXL	6	0.909536
ENSG00000136167	0.881698	LCP1	6	0.894194
ENSG00000060558	0.858668	GNA15	6	0.889219
ENSG00000123416	0.78942	TUBA1B	6	0.883267
ENSG00000020633	0.852777	RUNX3	6	0.877051
ENSG00000064666	0.875043	CNN2	6	0.864662
ENSG00000217555	0.878325	CKLF	6	0.842302
ENSG00000076662	0.87132	ICAM3	6	0.827458
ENSG00000085063	0.866521	CD59	6	0.82246
ENSG00000147168	0.85364	IL2RG	6	0.803019
ENSG00000184009	0.908941	ACTG1	6	0.795656
ENSG00000108798	0.831528	ABI3	6	0.783625
ENSG00000157303	0.856541	SUSD3	6	0.781248
ENSG00000161642	0.856858	ZNF385A	6	0.755821
ENSG00000149269	0.854721	PAK1	6	0.74657
ENSG00000012779	0.848801	ALOX5	6	0.739064
ENSG00000179344	0.847777	HLA-DQB1	6	0.727693
ENSG00000111679	0.8535	PTPN6	6	0.726567
ENSG00000168394	0.831237	TAP1	6	0.725348
ENSG00000128245	0.827204	YWHAH	6	0.722848
ENSG00000079112	0.808309	CDH17	6	0.719334
ENSG00000162734	0.823085	PEA15	6	0.716644
ENSG00000196735	0.822149	HLA-DQA1	6	0.70949
ENSG00000112576	0.825516	CCND3	6	0.70838
ENSG00000106066	0.808151	CPVL	6	0.704885
ENSG00000134333	0.808479	LDHA	6	0.698204
ENSG00000019582	0.890686	CD74	6	0.695847
ENSG00000131236	0.861394	CAP1	6	0.691049
ENSG00000166920	0.812215	C15orf48	6	0.684682
ENSG00000151651	0.816755	ADAM8	6	0.661685
ENSG00000159335	0.779652	PTMS	6	0.653651
ENSG00000100985	0.658874	MMP9	6	0.648483
ENSG00000160255	0.865391	ITGB2	6	0.642684
ENSG00000115091	0.835493	ACTR3	6	0.638565
ENSG00000075624	0.871752	ACTB	6	0.638464
ENSG00000189067	0.815682	LITAF	6	0.622568
ENSG00000072818	0.809227	ACAP1	6	0.617754
ENSG00000102879	0.809533	CORO1A	6	0.612563
ENSG00000204308	0.77831	RNF5	6	0.610518
ENSG00000169116	0.803963	PARM1	6	0.607668
ENSG00000130529	0.759778	TRPM4	6	0.602077
ENSG00000185043	0.813249	CIB1	6	0.600919
ENSG00000101608	0.823563	MYL12A	6	0.599568
ENSG00000231389	0.804147	HLA-DPA1	6	0.598752
ENSG00000108518	0.869461	PFN1	6	0.595963
ENSG00000066336	0.849905	SPI1	6	0.594717
ENSG00000196230	0.678441	TUBB	6	0.582844
ENSG00000168060	0.754546	NAALADL1	6	0.580578
ENSG00000166002	0.797898	SMCO4	6	0.576467
ENSG00000067225	0.810297	PKM	6	0.569653
ENSG00000197580	0.79197	BCO2	6	0.56636
ENSG00000138185	0.771535	ENTPD1	6	0.563334
ENSG00000182054	0.784289	IDH2	6	0.562858
ENSG00000186350	0.788444	RXRA	6	0.561679
ENSG00000143753	0.783414	DEGS1	6	0.559434
ENSG00000169032	0.780527	MAP2K1	6	0.548086
ENSG00000150782	0.800933	IL18	6	0.5461
ENSG00000111843	0.786022	TMEM14C	6	0.543614
ENSG00000198502	0.785048	HLA-DRB5	6	0.542363
ENSG00000080822	0.789786	CLDND1	6	0.540662
ENSG00000213889	0.712089	PPM1N	6	0.539899
ENSG00000112486	0.784817	CCR6	6	0.539622
ENSG00000169567	0.778878	HINT1	6	0.537039
ENSG00000111348	0.826395	ARHGDIB	6	0.524027
ENSG00000118508	0.767424	RAB32	6	0.51765
ENSG00000105854	0.754905	PON2	6	0.507347
ENSG00000204287	0.802805	HLA-DRA	6	0.502369
ENSG00000164949	0.706928	GEM	6	0.501621
