# Supplementary material for: Cross-Species Single-Cell Analysis of Pancreatic Ductal Adenocarcinoma Reveals Antigen-Presenting Cancer-Associated Fibroblasts
Source: Oxford University Press journal article supplement (doi:10.1158/2159-8290.cd-19-0094), 2019-06-13
Supplement: 21598290cd190094-sup-215864_2_supp_5552226_ps91bp.xlsx [file 21598290cd190094-sup-215864_2_supp_5552226_ps91bp.xlsx]

## Sheet: Cluster 1
	Score	Associated.Gene.Name	dbCluster	avgDiff
ENSG00000161570	0.822814	CCL5	1	1.00061
ENSG00000145649	0.736301	GZMA	1	0.557006
ENSG00000153563	0.708335	CD8A	1	0.597111
ENSG00000113088	0.705331	GZMK	1	0.819484
ENSG00000172116	0.681827	CD8B	1	0.508549

## Sheet: Cluster 2
	Score	Associated.Gene.Name	dbCluster	avgDiff
ENSG00000109475	0.798312	RPL34	2	0.506538
ENSG00000171223	0.769109	JUNB	2	0.718083
ENSG00000070756	0.753567	PABPC1	2	0.584889
ENSG00000184557	0.710992	SOCS3	2	0.588673
ENSG00000170345	0.701774	FOS	2	0.527616
ENSG00000167996	0.689816	FTH1	2	0.544627

## Sheet: Cluster 3
	Score	Associated.Gene.Name	dbCluster	avgDiff
ENSG00000186891	0.875699	TNFRSF18	3	1.18456
ENSG00000008517	0.873015	IL32	3	0.942947
ENSG00000186827	0.858396	TNFRSF4	3	1.43926
ENSG00000156127	0.855446	BATF	3	0.902166
ENSG00000090104	0.852052	RGS1	3	1.24166
ENSG00000181847	0.850254	TIGIT	3	0.838323
ENSG00000227507	0.832137	LTB	3	1.11535
ENSG00000023445	0.812159	BIRC3	3	0.873521
ENSG00000120875	0.799374	DUSP4	3	0.892297
ENSG00000049768	0.79384	FOXP3	3	0.649623
ENSG00000204397	0.792381	CARD16	3	0.68201
ENSG00000130066	0.790447	SAT1	3	0.847287
ENSG00000206503	0.784332	HLA-A	3	0.506429
ENSG00000111640	0.77917	GAPDH	3	0.699048
ENSG00000163599	0.776326	CTLA4	3	0.665208
ENSG00000134460	0.773648	IL2RA	3	0.75542
ENSG00000141682	0.77078	PMAIP1	3	0.816032
ENSG00000019582	0.765074	CD74	3	0.637192
ENSG00000102096	0.763214	PIM2	3	0.634823
ENSG00000100906	0.762596	NFKBIA	3	0.742374
ENSG00000067225	0.755606	PKM	3	0.762216
ENSG00000150991	0.754509	UBC	3	0.576922
ENSG00000172725	0.753768	CORO1B	3	0.580891
ENSG00000204389	0.752774	HSPA1A	3	0.614196
ENSG00000196126	0.748834	HLA-DRB1	3	0.596382
ENSG00000196154	0.745478	S100A4	3	0.586565
ENSG00000028137	0.742381	TNFRSF1B	3	0.537432
ENSG00000025708	0.741475	TYMP	3	0.537731
ENSG00000109861	0.736757	CTSC	3	0.579829
ENSG00000096384	0.733246	HSP90AB1	3	0.535823
ENSG00000095794	0.732532	CREM	3	0.588331
ENSG00000120129	0.725093	DUSP1	3	0.550292
ENSG00000107485	0.717351	GATA3	3	0.539161
ENSG00000049249	0.716929	TNFRSF9	3	0.500525
ENSG00000197728	0.715203	RPS26	3	0.533076

## Sheet: Cluster 4
	Score	Associated.Gene.Name	dbCluster	avgDiff
ENSG00000105374	0.979255	NKG7	4	1.83213
ENSG00000100453	0.937114	GZMB	4	1.61352
ENSG00000180644	0.911844	PRF1	4	1.43293
ENSG00000100450	0.885004	GZMH	4	1.27665
ENSG00000137441	0.872533	FGFBP2	4	1.13706
ENSG00000115523	0.855633	GNLY	4	1.96203
ENSG00000129277	0.850104	CCL4	4	1.37718
ENSG00000077984	0.842742	CST7	4	0.838698
ENSG00000172543	0.833607	CTSW	4	0.819501
ENSG00000134539	0.819577	KLRD1	4	0.901858
ENSG00000203747	0.801305	FCGR3A	4	1.03053
ENSG00000160255	0.783281	ITGB2	4	0.60275
ENSG00000145649	0.774384	GZMA	4	0.691728
ENSG00000161570	0.766311	CCL5	4	0.696397
ENSG00000051523	0.755661	CYBA	4	0.504089
ENSG00000150045	0.738791	KLRF1	4	0.796979
ENSG00000011600	0.726342	TYROBP	4	0.775227
ENSG00000187118	0.708735	CMC1	4	0.776432
ENSG00000185201	0.701404	IFITM2	4	0.514852
ENSG00000159674	0.698785	SPON2	4	0.636462
ENSG00000145287	0.693336	PLAC8	4	0.546253
ENSG00000198821	0.692949	CD247	4	0.518921
ENSG00000006075	0.674708	CCL3	4	1.34809
ENSG00000111537	0.66187	IFNG	4	0.663117
ENSG00000158869	0.63219	FCER1G	4	0.526594

## Sheet: Cluster 5
	Score	Associated.Gene.Name	dbCluster	avgDiff
ENSG00000164104	0.991553	HMGB2	5	1.76683
ENSG00000117632	0.990828	STMN1	5	1.68712
ENSG00000123416	0.989347	TUBA1B	5	1.8358
ENSG00000196230	0.980142	TUBB	5	1.82583
ENSG00000198830	0.967694	HMGN2	5	1.27873
ENSG00000189403	0.963589	HMGB1	5	0.976009
ENSG00000173207	0.958131	CKS1B	5	0.823755
ENSG00000137804	0.946738	NUSAP1	5	0.754996
ENSG00000113810	0.943315	SMC4	5	0.720363
ENSG00000089685	0.941577	BIRC5	5	0.738188
ENSG00000111640	0.932402	GAPDH	5	1.01428
ENSG00000184009	0.932212	ACTG1	5	0.995263
ENSG00000164032	0.931498	H2AFZ	5	1.01004
ENSG00000131747	0.929933	TOP2A	5	0.888584
ENSG00000170312	0.928328	CDK1	5	0.611251
ENSG00000075624	0.926402	ACTB	5	1.02346
ENSG00000105968	0.921227	H2AFV	5	0.757213
ENSG00000175063	0.918822	UBE2C	5	1.05154
ENSG00000164611	0.908496	PTTG1	5	0.935934
ENSG00000132341	0.908107	RAN	5	0.751473
ENSG00000148773	0.907876	MKI67	5	0.728474
ENSG00000166803	0.904411	KIAA0101	5	0.774532
ENSG00000108518	0.904291	PFN1	5	0.896968
ENSG00000160014	0.901087	CALM3	5	0.740644
ENSG00000136938	0.88756	ANP32B	5	0.695762
ENSG00000123975	0.879334	CKS2	5	0.66597
ENSG00000026025	0.879159	VIM	5	0.845689
ENSG00000122566	0.869755	HNRNPA2B1	5	0.649774
ENSG00000172757	0.867891	CFL1	5	0.654334
ENSG00000117724	0.86725	CENPF	5	0.751672
ENSG00000189159	0.866532	HN1	5	0.743489
ENSG00000176890	0.861557	TYMS	5	0.789199
ENSG00000176340	0.85909	COX8A	5	0.608275
ENSG00000069275	0.85456	NUCKS1	5	0.616343
ENSG00000182481	0.845561	KPNA2	5	0.691376
ENSG00000170540	0.837727	ARL6IP1	5	0.847036
ENSG00000102879	0.836789	CORO1A	5	0.649497
ENSG00000117399	0.835916	CDC20	5	0.582904
ENSG00000196262	0.832711	PPIA	5	0.624259
ENSG00000067225	0.831485	PKM	5	0.910566
ENSG00000157456	0.829013	CCNB2	5	0.532715
ENSG00000167553	0.828534	TUBA1C	5	0.567618
ENSG00000124795	0.825686	DEK	5	0.565761
ENSG00000132646	0.822512	PCNA	5	0.739713
ENSG00000188612	0.820874	SUMO2	5	0.502041
ENSG00000171848	0.817615	RRM2	5	0.592955
ENSG00000128951	0.813569	DUT	5	0.652099
ENSG00000125148	0.813166	MT2A	5	0.779322
ENSG00000197061	0.812301	HIST1H4C	5	1.34494
ENSG00000162704	0.804651	ARPC5	5	0.525151
ENSG00000066279	0.804559	ASPM	5	0.538794
ENSG00000092841	0.803478	MYL6	5	0.509587
ENSG00000143933	0.803086	CALM2	5	0.650451
ENSG00000187514	0.801685	PTMA	5	0.50299
ENSG00000188229	0.796931	TUBB4B	5	0.64676
ENSG00000163466	0.796224	ARPC2	5	0.50795
ENSG00000111669	0.794018	TPI1	5	0.545178
ENSG00000134333	0.790934	LDHA	5	0.522591
ENSG00000074800	0.782568	ENO1	5	0.728394
ENSG00000196126	0.777908	HLA-DRB1	5	0.858621
ENSG00000019582	0.772462	CD74	5	0.719757
ENSG00000204287	0.75747	HLA-DRA	5	0.622419
ENSG00000103187	0.742759	COTL1	5	0.578269
ENSG00000100097	0.733373	LGALS1	5	0.993369
