# Supplementary material for: Cross-Species Single-Cell Analysis of Pancreatic Ductal Adenocarcinoma Reveals Antigen-Presenting Cancer-Associated Fibroblasts
Source: Oxford University Press journal article supplement (doi:10.1158/2159-8290.cd-19-0094), 2019-06-13
Supplement: 21598290cd190094-sup-215864_2_supp_5552227_ps91bp.xlsx [file 21598290cd190094-sup-215864_2_supp_5552227_ps91bp.xlsx]

## Sheet: iCAF
Score	Associated.Gene.Name	dbCluster	avgDiff
0.945335	C3	1	1.95115
0.942405	DUSP1	1	1.62202
0.942209	FBLN1	1	1.70554
0.940391	LMNA	1	2.02369
0.938156	CLU	1	2.57323
0.934587	CCDC80	1	1.51725
0.930839	MYC	1	1.99541
0.923602	EFEMP1	1	1.6857
0.919898	HAS1	1	3.04801
0.91819	NR4A1	1	1.42755
0.908544	CFD	1	4.40593
0.900405	ANXA1	1	1.48408
0.895972	CXCL12	1	1.66139
0.895583	FGF7	1	1.54899
0.89426	KLF4	1	1.78701
0.886975	EMP1	1	2.04229
0.884823	GPRC5A	1	1.4102
0.869974	SRPX	1	1.529
0.869833	MT2A	1	1.93283
0.865291	MEDAG	1	1.38782
0.864189	IGF1	1	1.46949
0.863807	MGST1	1	1.34988
0.862246	MCL1	1	1.00085
0.859898	CEBPD	1	1.46775
0.858886	S100A10	1	1.30754
0.858642	UAP1	1	1.5459
0.857704	TNXB	1	1.69562
0.855886	CEBPB	1	1.29057
0.852208	PNRC1	1	1.57339
0.849735	SOCS3	1	1.25373
0.848784	PTGDS	1	1.92212
0.84873	FOSB	1	1.38846
0.846096	NFKBIA	1	1.2136
0.844859	CXCL2	1	2.6259
0.843745	THBS1	1	1.26782
0.841063	CCL2	1	2.58557
0.839713	OGN	1	1.21939
0.839341	GSN	1	1.69042
0.839225	DPT	1	1.6718
0.838217	PLA2G2A	1	3.33105
0.837696	NAMPT	1	1.1657
0.8354	ITM2A	1	1.21696
0.83478	RGCC	1	1.73465
0.834343	JUND	1	1.17652
0.834304	NNMT	1	1.07676
0.828198	ZFP36	1	1.09796
0.822118	PIM1	1	1.15377
0.821781	CPE	1	1.14731
0.815183	GFPT2	1	1.2407
0.814849	SOD2	1	1.6093
0.808155	KDM6B	1	1.12551
0.808033	FSTL1	1	1.08209
0.80696	FBLN2	1	1.26087
0.806186	NR4A3	1	1.04195
0.794642	MFAP5	1	1.98669
0.792702	ABL2	1	1.0306
0.786898	SGK1	1	1.60506
0.785221	CILP	1	1.24909
0.784454	UGDH	1	1.46841
0.779597	FBLN5	1	1.08324
0.778682	ADAMTS1	1	1.23289
0.776857	ADH1B	1	1.17345
0.772364	WISP2	1	1.0997
0.771744	GPX3	1	1.21404
0.770266	S100A4	1	1.07977
0.770128	IL6	1	1.98642
0.764102	HAS2	1	1.36329
0.762602	PLAC9	1	1.13648
0.749459	IGFBP6	1	1.34683
0.738169	FBN1	1	1.10906
0.715912	BDKRB1	1	1.25901
0.713262	TPPP3	1	1.52449
0.712003	RASD1	1	1.37551
0.705342	MT1A	1	1.54868
0.702566	CXCL14	1	1.37811
0.694498	PI16	1	1.38648
0.687701	APOE	1	1.54975
0.669071	IL8	1	1.72922
0.661648	ARC	1	1.05685
0.653686	PTX3	1	1.16357
0.632364	TNFAIP6	1	1.23262
0.6059	MT1E	1	1.00056
0.600633	MT1X	1	1.14626
0.587036	CXCL1	1	1.58235

## Sheet: myCAF
Score	Associated.Gene.Name	dbCluster	avgDiff
0.886519	MYL9	2	1.50334
0.885753	CALD1	2	1.09724
0.879118	MMP11	2	2.2865
0.873638	HOPX	2	1.43554
0.873086	BGN	2	1.14679
0.871049	IGFBP7	2	1.12817
0.85559	TPM2	2	1.41974
0.853919	CTHRC1	2	1.16945
0.840154	ACTA2	2	1.94479
0.839954	TAGLN	2	1.69238
0.837388	INHBA	2	1.11393
0.835593	COL10A1	2	1.16403
0.825204	TPM1	2	1.18586
0.816816	POSTN	2	1.5528
0.727441	GRP	2	1.24244
0.699528	CST1	2	1.78908
