# Supplementary material for: Cross-Species Single-Cell Analysis of Pancreatic Ductal Adenocarcinoma Reveals Antigen-Presenting Cancer-Associated Fibroblasts
Source: Oxford University Press journal article supplement (doi:10.1158/2159-8290.cd-19-0094), 2019-06-13
Supplement: 21598290cd190094-sup-215864_2_supp_5552228_ps91bp.xlsx [file 21598290cd190094-sup-215864_2_supp_5552228_ps91bp.xlsx]

## Sheet: my_v_i_KEGG_gsea_report_pos
NAME	GS<br> follow link to MSigDB	GS DETAILS	SIZE	ES	NES	NOM p-val	FDR q-val	FWER p-val	RANK AT MAX	LEADING EDGE
KEGG_VASCULAR_SMOOTH_MUSCLE_CONTRACTION	KEGG_VASCULAR_SMOOTH_MUSCLE_CONTRACTION	Details ...	21	0.780497	2.45871	0	0	0	198	tags=52%, list=9%, signal=57%
KEGG_FOCAL_ADHESION	KEGG_FOCAL_ADHESION	Details ...	57	0.469163	1.89215	0.00136426	0.0911198	0.161	507	tags=46%, list=22%, signal=57%
KEGG_CALCIUM_SIGNALING_PATHWAY	KEGG_CALCIUM_SIGNALING_PATHWAY	Details ...	17	0.578812	1.7422	0.0192926	0.181476	0.415	304	tags=41%, list=13%, signal=47%
KEGG_REGULATION_OF_ACTIN_CYTOSKELETON	KEGG_REGULATION_OF_ACTIN_CYTOSKELETON	Details ...	50	0.419882	1.59976	0.0335766	0.308409	0.694	690	tags=58%, list=30%, signal=82%
KEGG_OXIDATIVE_PHOSPHORYLATION	KEGG_OXIDATIVE_PHOSPHORYLATION	Details ...	81	0.373236	1.58602	0.0167959	0.262433	0.722	1269	tags=85%, list=56%, signal=186%
KEGG_DILATED_CARDIOMYOPATHY	KEGG_DILATED_CARDIOMYOPATHY	Details ...	18	0.488696	1.4824	0.0828026	0.373607	0.898	205	tags=33%, list=9%, signal=36%
KEGG_HYPERTROPHIC_CARDIOMYOPATHY_HCM	KEGG_HYPERTROPHIC_CARDIOMYOPATHY_HCM	Details ...	18	0.481793	1.43852	0.086262	0.398345	0.936	205	tags=33%, list=9%, signal=36%
KEGG_PARKINSONS_DISEASE	KEGG_PARKINSONS_DISEASE	Details ...	70	0.348547	1.43512	0.0497312	0.355035	0.942	1374	tags=91%, list=61%, signal=225%
KEGG_ECM_RECEPTOR_INTERACTION	KEGG_ECM_RECEPTOR_INTERACTION	Details ...	26	0.409693	1.35279	0.126657	0.473485	0.988	192	tags=23%, list=8%, signal=25%
KEGG_TIGHT_JUNCTION	KEGG_TIGHT_JUNCTION	Details ...	23	0.418596	1.34222	0.1406	0.447086	0.992	325	tags=35%, list=14%, signal=40%
KEGG_GAP_JUNCTION	KEGG_GAP_JUNCTION	Details ...	15	0.428305	1.27404	0.190923	0.544344	0.997	304	tags=40%, list=13%, signal=46%
KEGG_HUNTINGTONS_DISEASE	KEGG_HUNTINGTONS_DISEASE	Details ...	90	0.285756	1.25197	0.157258	0.550184	0.998	1374	tags=86%, list=61%, signal=208%
KEGG_PATHOGENIC_ESCHERICHIA_COLI_INFECTION	KEGG_PATHOGENIC_ESCHERICHIA_COLI_INFECTION	Details ...	26	0.364281	1.18686	0.25	0.651916	1	676	tags=50%, list=30%, signal=70%
KEGG_CARDIAC_MUSCLE_CONTRACTION	KEGG_CARDIAC_MUSCLE_CONTRACTION	Details ...	27	0.34247	1.14365	0.289985	0.711485	1	978	tags=63%, list=43%, signal=109%
KEGG_PROTEASOME	KEGG_PROTEASOME	Details ...	33	0.315281	1.11919	0.294551	0.719666	1	1466	tags=91%, list=65%, signal=253%
KEGG_VASOPRESSIN_REGULATED_WATER_REABSORPTION	KEGG_VASOPRESSIN_REGULATED_WATER_REABSORPTION	Details ...	16	0.367189	1.0896	0.368339	0.746048	1	1278	tags=88%, list=56%, signal=199%
KEGG_ENDOCYTOSIS	KEGG_ENDOCYTOSIS	Details ...	37	0.30226	1.08647	0.355167	0.710159	1	944	tags=62%, list=42%, signal=105%
KEGG_PURINE_METABOLISM	KEGG_PURINE_METABOLISM	Details ...	22	0.329592	1.05853	0.391371	0.729126	1	1359	tags=82%, list=60%, signal=202%
KEGG_PYRIMIDINE_METABOLISM	KEGG_PYRIMIDINE_METABOLISM	Details ...	20	0.339153	1.05395	0.40981	0.699502	1	1359	tags=85%, list=60%, signal=210%
KEGG_VIBRIO_CHOLERAE_INFECTION	KEGG_VIBRIO_CHOLERAE_INFECTION	Details ...	20	0.320683	1.02518	0.418856	0.725957	1	1260	tags=75%, list=56%, signal=167%
KEGG_ADHERENS_JUNCTION	KEGG_ADHERENS_JUNCTION	Details ...	15	0.350414	1.01762	0.456829	0.705816	1	676	tags=47%, list=30%, signal=66%
KEGG_ALZHEIMERS_DISEASE	KEGG_ALZHEIMERS_DISEASE	Details ...	80	0.233386	0.996865	0.49118	0.713984	1	1249	tags=75%, list=55%, signal=161%
KEGG_TGF_BETA_SIGNALING_PATHWAY	KEGG_TGF_BETA_SIGNALING_PATHWAY	Details ...	18	0.32257	0.994199	0.453988	0.687964	1	540	tags=50%, list=24%, signal=65%
KEGG_ARRHYTHMOGENIC_RIGHT_VENTRICULAR_CARDIOMYOPATHY_ARVC	KEGG_ARRHYTHMOGENIC_RIGHT_VENTRICULAR_CARDIOMYOPATHY_ARVC	Details ...	15	0.331295	0.942934	0.532738	0.754888	1	377	tags=33%, list=17%, signal=40%
KEGG_LEUKOCYTE_TRANSENDOTHELIAL_MIGRATION	KEGG_LEUKOCYTE_TRANSENDOTHELIAL_MIGRATION	Details ...	26	0.236149	0.798161	0.735905	0.989015	1	168	tags=19%, list=7%, signal=21%
KEGG_ANTIGEN_PROCESSING_AND_PRESENTATION	KEGG_ANTIGEN_PROCESSING_AND_PRESENTATION	Details ...	21	0.243897	0.76098	0.785714	1	1	300	tags=24%, list=13%, signal=27%
KEGG_FC_GAMMA_R_MEDIATED_PHAGOCYTOSIS	KEGG_FC_GAMMA_R_MEDIATED_PHAGOCYTOSIS	Details ...	16	0.255938	0.736638	0.783206	1	1	666	tags=56%, list=29%, signal=79%
KEGG_GLYCOLYSIS_GLUCONEOGENESIS	KEGG_GLYCOLYSIS_GLUCONEOGENESIS	Details ...	16	0.245604	0.711857	0.822556	1	1	864	tags=56%, list=38%, signal=90%
KEGG_PROSTATE_CANCER	KEGG_PROSTATE_CANCER	Details ...	18	0.222053	0.675998	0.869369	1	1	308	tags=17%, list=14%, signal=19%
KEGG_UBIQUITIN_MEDIATED_PROTEOLYSIS	KEGG_UBIQUITIN_MEDIATED_PROTEOLYSIS	Details ...	22	0.207302	0.668759	0.874627	0.996888	1	575	tags=32%, list=25%, signal=42%
KEGG_EPITHELIAL_CELL_SIGNALING_IN_HELICOBACTER_PYLORI_INFECTION	KEGG_EPITHELIAL_CELL_SIGNALING_IN_HELICOBACTER_PYLORI_INFECTION	Details ...	15	0.19215	0.548944	0.948407	1	1	1025	tags=60%, list=45%, signal=109%
KEGG_NEUROTROPHIN_SIGNALING_PATHWAY	KEGG_NEUROTROPHIN_SIGNALING_PATHWAY	Details ...	23	0.150996	0.490893	0.979969	1	1	666	tags=30%, list=29%, signal=43%
KEGG_SPLICEOSOME	KEGG_SPLICEOSOME	Details ...	58	0.117359	0.468708	0.997211	1	1	1066	tags=43%, list=47%, signal=79%
KEGG_OOCYTE_MEIOSIS	KEGG_OOCYTE_MEIOSIS	Details ...	20	0.132902	0.407312	1	0.995778	1	636	tags=25%, list=28%, signal=34%

## Sheet: my_v_i_KEGG_gsea_report_neg
NAME	GS<br> follow link to MSigDB	GS DETAILS	SIZE	ES	NES	NOM p-val	FDR q-val	FWER p-val	RANK AT MAX	LEADING EDGE
KEGG_COMPLEMENT_AND_COAGULATION_CASCADES	KEGG_COMPLEMENT_AND_COAGULATION_CASCADES	Details ...	17	-0.574174	-1.96342	0.00574713	0.0359168	0.036	279	tags=65%, list=12%, signal=73%
KEGG_MAPK_SIGNALING_PATHWAY	KEGG_MAPK_SIGNALING_PATHWAY	Details ...	37	-0.430024	-1.80751	0.00327869	0.0636085	0.127	264	tags=38%, list=12%, signal=42%
KEGG_SYSTEMIC_LUPUS_ERYTHEMATOSUS	KEGG_SYSTEMIC_LUPUS_ERYTHEMATOSUS	Details ...	18	-0.505442	-1.76491	0.0145349	0.0571841	0.166	210	tags=39%, list=9%, signal=43%
KEGG_CHEMOKINE_SIGNALING_PATHWAY	KEGG_CHEMOKINE_SIGNALING_PATHWAY	Details ...	19	-0.50083	-1.75115	0.0027933	0.0472058	0.18	70	tags=21%, list=3%, signal=22%
KEGG_LEISHMANIA_INFECTION	KEGG_LEISHMANIA_INFECTION	Details ...	15	-0.524328	-1.74701	0.0290698	0.0379647	0.181	301	tags=47%, list=13%, signal=53%
KEGG_RIBOSOME	KEGG_RIBOSOME	Details ...	84	-0.319275	-1.59807	0.0179211	0.0800314	0.396	1180	tags=93%, list=52%, signal=186%
KEGG_CYTOKINE_CYTOKINE_RECEPTOR_INTERACTION	KEGG_CYTOKINE_CYTOKINE_RECEPTOR_INTERACTION	Details ...	19	-0.437093	-1.56436	0.0362538	0.0854643	0.468	326	tags=58%, list=14%, signal=67%
KEGG_VIRAL_MYOCARDITIS	KEGG_VIRAL_MYOCARDITIS	Details ...	19	-0.39837	-1.39613	0.102493	0.189534	0.797	195	tags=32%, list=9%, signal=34%
KEGG_CELL_ADHESION_MOLECULES_CAMS	KEGG_CELL_ADHESION_MOLECULES_CAMS	Details ...	17	-0.405982	-1.35688	0.139601	0.201294	0.855	158	tags=29%, list=7%, signal=31%
KEGG_PATHWAYS_IN_CANCER	KEGG_PATHWAYS_IN_CANCER	Details ...	57	-0.273701	-1.29409	0.0974729	0.239495	0.929	222	tags=23%, list=10%, signal=25%
KEGG_SMALL_CELL_LUNG_CANCER	KEGG_SMALL_CELL_LUNG_CANCER	Details ...	16	-0.374196	-1.22036	0.22792	0.296471	0.969	222	tags=38%, list=10%, signal=41%
KEGG_WNT_SIGNALING_PATHWAY	KEGG_WNT_SIGNALING_PATHWAY	Details ...	18	-0.30614	-1.06147	0.377419	0.492785	0.996	351	tags=33%, list=15%, signal=39%
KEGG_P53_SIGNALING_PATHWAY	KEGG_P53_SIGNALING_PATHWAY	Details ...	16	-0.287149	-0.947634	0.498534	0.650879	1	322	tags=44%, list=14%, signal=51%
KEGG_CELL_CYCLE	KEGG_CELL_CYCLE	Details ...	23	-0.249228	-0.933545	0.572347	0.628466	1	415	tags=30%, list=18%, signal=37%
KEGG_INSULIN_SIGNALING_PATHWAY	KEGG_INSULIN_SIGNALING_PATHWAY	Details ...	17	-0.218026	-0.738068	0.781341	0.877872	1	110	tags=12%, list=5%, signal=12%
KEGG_LYSOSOME	KEGG_LYSOSOME	Details ...	30	-0.136212	-0.546051	0.985465	0.972829	1	1508	tags=90%, list=66%, signal=265%

## Sheet: my_v_i_REACTOME_gsea_report_pos
NAME	GS<br> follow link to MSigDB	GS DETAILS	SIZE	ES	NES	NOM p-val	FDR q-val	FWER p-val	RANK AT MAX	LEADING EDGE
REACTOME_SMOOTH_MUSCLE_CONTRACTION	REACTOME_SMOOTH_MUSCLE_CONTRACTION	Details ...	19	0.711377	2.24616	0	0.00342057	0.004	205	tags=53%, list=9%, signal=57%
REACTOME_MUSCLE_CONTRACTION	REACTOME_MUSCLE_CONTRACTION	Details ...	20	0.70174	2.2342	0	0.00171029	0.004	205	tags=50%, list=9%, signal=54%
REACTOME_INTEGRATION_OF_ENERGY_METABOLISM	REACTOME_INTEGRATION_OF_ENERGY_METABOLISM	Details ...	17	0.731776	2.19749	0	0.00196204	0.007	153	tags=24%, list=7%, signal=25%
REACTOME_EXTRACELLULAR_MATRIX_ORGANIZATION	REACTOME_EXTRACELLULAR_MATRIX_ORGANIZATION	Details ...	26	0.565216	1.89657	0.00459418	0.0802295	0.316	396	tags=46%, list=17%, signal=55%
REACTOME_COLLAGEN_FORMATION	REACTOME_COLLAGEN_FORMATION	Details ...	22	0.533156	1.72603	0.0232558	0.216365	0.72	396	tags=45%, list=17%, signal=55%
REACTOME_GPCR_DOWNSTREAM_SIGNALING	REACTOME_GPCR_DOWNSTREAM_SIGNALING	Details ...	22	0.517932	1.63855	0.0362538	0.314885	0.893	144	tags=27%, list=6%, signal=29%
REACTOME_SEMAPHORIN_INTERACTIONS	REACTOME_SEMAPHORIN_INTERACTIONS	Details ...	17	0.532128	1.59092	0.0401235	0.359385	0.947	561	tags=65%, list=25%, signal=85%
REACTOME_GPCR_LIGAND_BINDING	REACTOME_GPCR_LIGAND_BINDING	Details ...	16	0.539929	1.57664	0.046729	0.340492	0.956	126	tags=31%, list=6%, signal=33%
REACTOME_SIGNALING_BY_GPCR	REACTOME_SIGNALING_BY_GPCR	Details ...	32	0.442297	1.53887	0.0386266	0.372883	0.977	145	tags=22%, list=6%, signal=23%
REACTOME_RESPIRATORY_ELECTRON_TRANSPORT_ATP_SYNTHESIS_BY_CHEMIOSMOTIC_COUPLING_AND_HEAT_PRODUCTION_BY_UNCOUPLING_PROTEINS_	REACTOME_RESPIRATORY_ELECTRON_TRANSPORT_ATP_SYNTHESIS_BY_CHEMIOSMOTIC_COUPLING_AND_HEAT_PRODUCTION_BY_UNCOUPLING_PROTEINS_	Details ...	64	0.358239	1.45916	0.0530612	0.5288	1	1269	tags=86%, list=56%, signal=190%
REACTOME_RESPIRATORY_ELECTRON_TRANSPORT	REACTOME_RESPIRATORY_ELECTRON_TRANSPORT	Details ...	52	0.371198	1.43919	0.0699865	0.535957	1	1249	tags=87%, list=55%, signal=188%
REACTOME_TCA_CYCLE_AND_RESPIRATORY_ELECTRON_TRANSPORT	REACTOME_TCA_CYCLE_AND_RESPIRATORY_ELECTRON_TRANSPORT	Details ...	76	0.342001	1.41401	0.0584329	0.559075	1	1269	tags=82%, list=56%, signal=179%
REACTOME_NEURONAL_SYSTEM	REACTOME_NEURONAL_SYSTEM	Details ...	25	0.419733	1.38124	0.109907	0.608625	1	456	tags=28%, list=20%, signal=35%
REACTOME_AXON_GUIDANCE	REACTOME_AXON_GUIDANCE	Details ...	50	0.342734	1.3444	0.10221	0.675539	1	497	tags=38%, list=22%, signal=48%
REACTOME_DEVELOPMENTAL_BIOLOGY	REACTOME_DEVELOPMENTAL_BIOLOGY	Details ...	71	0.319622	1.31179	0.108696	0.73332	1	497	tags=39%, list=22%, signal=49%
REACTOME_HIV_INFECTION	REACTOME_HIV_INFECTION	Details ...	73	0.301875	1.25727	0.159787	0.872179	1	1361	tags=81%, list=60%, signal=196%
REACTOME_MEMBRANE_TRAFFICKING	REACTOME_MEMBRANE_TRAFFICKING	Details ...	35	0.352615	1.2321	0.202878	0.911344	1	881	tags=57%, list=39%, signal=92%
REACTOME_CELL_CELL_COMMUNICATION	REACTOME_CELL_CELL_COMMUNICATION	Details ...	21	0.387122	1.23074	0.217391	0.865038	1	488	tags=48%, list=22%, signal=60%
REACTOME_HOST_INTERACTIONS_OF_HIV_FACTORS	REACTOME_HOST_INTERACTIONS_OF_HIV_FACTORS	Details ...	54	0.306243	1.20987	0.218182	0.89308	1	1361	tags=81%, list=60%, signal=199%
REACTOME_ER_PHAGOSOME_PATHWAY	REACTOME_ER_PHAGOSOME_PATHWAY	Details ...	41	0.325982	1.17335	0.239398	0.980873	1	1471	tags=93%, list=65%, signal=259%
REACTOME_APC_C_CDC20_MEDIATED_DEGRADATION_OF_MITOTIC_PROTEINS	REACTOME_APC_C_CDC20_MEDIATED_DEGRADATION_OF_MITOTIC_PROTEINS	Details ...	35	0.319791	1.16898	0.26338	0.950098	1	1466	tags=91%, list=65%, signal=255%
REACTOME_REGULATION_OF_ORNITHINE_DECARBOXYLASE_ODC	REACTOME_REGULATION_OF_ORNITHINE_DECARBOXYLASE_ODC	Details ...	32	0.328612	1.15817	0.266667	0.944715	1	1466	tags=91%, list=65%, signal=253%
REACTOME_AUTODEGRADATION_OF_CDH1_BY_CDH1_APC_C	REACTOME_AUTODEGRADATION_OF_CDH1_BY_CDH1_APC_C	Details ...	35	0.319791	1.15701	0.289552	0.907445	1	1466	tags=91%, list=65%, signal=255%
REACTOME_REGULATION_OF_APOPTOSIS	REACTOME_REGULATION_OF_APOPTOSIS	Details ...	36	0.326294	1.15368	0.281609	0.881124	1	1466	tags=92%, list=65%, signal=255%
REACTOME_INFLUENZA_LIFE_CYCLE	REACTOME_INFLUENZA_LIFE_CYCLE	Details ...	97	0.26071	1.14976	0.235849	0.85768	1	1630	tags=95%, list=72%, signal=323%
REACTOME_REGULATION_OF_MITOTIC_CELL_CYCLE	REACTOME_REGULATION_OF_MITOTIC_CELL_CYCLE	Details ...	36	0.320988	1.13911	0.303075	0.85808	1	1466	tags=92%, list=65%, signal=255%
REACTOME_APC_C_CDH1_MEDIATED_DEGRADATION_OF_CDC20_AND_OTHER_APC_C_CDH1_TARGETED_PROTEINS_IN_LATE_MITOSIS_EARLY_G1	REACTOME_APC_C_CDH1_MEDIATED_DEGRADATION_OF_CDC20_AND_OTHER_APC_C_CDH1_TARGETED_PROTEINS_IN_LATE_MITOSIS_EARLY_G1	Details ...	35	0.319791	1.13488	0.310888	0.839393	1	1466	tags=91%, list=65%, signal=255%
REACTOME_SCF_BETA_TRCP_MEDIATED_DEGRADATION_OF_EMI1	REACTOME_SCF_BETA_TRCP_MEDIATED_DEGRADATION_OF_EMI1	Details ...	34	0.317172	1.13387	0.274218	0.812384	1	1466	tags=91%, list=65%, signal=254%
REACTOME_ASSEMBLY_OF_THE_PRE_REPLICATIVE_COMPLEX	REACTOME_ASSEMBLY_OF_THE_PRE_REPLICATIVE_COMPLEX	Details ...	33	0.315764	1.12857	0.295903	0.800163	1	1466	tags=91%, list=65%, signal=253%
REACTOME_VIF_MEDIATED_DEGRADATION_OF_APOBEC3G	REACTOME_VIF_MEDIATED_DEGRADATION_OF_APOBEC3G	Details ...	36	0.307566	1.12227	0.296562	0.792399	1	1466	tags=89%, list=65%, signal=247%
REACTOME_AUTODEGRADATION_OF_THE_E3_UBIQUITIN_LIGASE_COP1	REACTOME_AUTODEGRADATION_OF_THE_E3_UBIQUITIN_LIGASE_COP1	Details ...	33	0.315764	1.11909	0.310496	0.776015	1	1466	tags=91%, list=65%, signal=253%
REACTOME_CDK_MEDIATED_PHOSPHORYLATION_AND_REMOVAL_OF_CDC6	REACTOME_CDK_MEDIATED_PHOSPHORYLATION_AND_REMOVAL_OF_CDC6	Details ...	33	0.315764	1.11569	0.324006	0.760875	1	1466	tags=91%, list=65%, signal=253%
REACTOME_P53_INDEPENDENT_G1_S_DNA_DAMAGE_CHECKPOINT	REACTOME_P53_INDEPENDENT_G1_S_DNA_DAMAGE_CHECKPOINT	Details ...	33	0.315764	1.11276	0.328551	0.7455	1	1466	tags=91%, list=65%, signal=253%
REACTOME_M_G1_TRANSITION	REACTOME_M_G1_TRANSITION	Details ...	34	0.317346	1.11184	0.311724	0.72586	1	1466	tags=91%, list=65%, signal=254%
REACTOME_GLUCOSE_METABOLISM	REACTOME_GLUCOSE_METABOLISM	Details ...	17	0.367632	1.1028	0.324074	0.729027	1	1018	tags=76%, list=45%, signal=138%
REACTOME_CDT1_ASSOCIATION_WITH_THE_CDC6_ORC_ORIGIN_COMPLEX	REACTOME_CDT1_ASSOCIATION_WITH_THE_CDC6_ORC_ORIGIN_COMPLEX	Details ...	33	0.315764	1.08033	0.357039	0.766767	1	1466	tags=91%, list=65%, signal=253%
REACTOME_CELL_CYCLE_CHECKPOINTS	REACTOME_CELL_CYCLE_CHECKPOINTS	Details ...	37	0.292363	1.06685	0.376224	0.781701	1	1466	tags=89%, list=65%, signal=248%
REACTOME_SYNTHESIS_OF_DNA	REACTOME_SYNTHESIS_OF_DNA	Details ...	37	0.290578	1.05924	0.382661	0.781265	1	1466	tags=89%, list=65%, signal=248%
REACTOME_INTEGRIN_CELL_SURFACE_INTERACTIONS	REACTOME_INTEGRIN_CELL_SURFACE_INTERACTIONS	Details ...	21	0.33949	1.05472	0.393189	0.772276	1	192	tags=24%, list=8%, signal=26%
REACTOME_DESTABILIZATION_OF_MRNA_BY_AUF1_HNRNP_D0	REACTOME_DESTABILIZATION_OF_MRNA_BY_AUF1_HNRNP_D0	Details ...	37	0.294772	1.04156	0.409348	0.786507	1	1466	tags=86%, list=65%, signal=241%
REACTOME_MITOTIC_M_M_G1_PHASES	REACTOME_MITOTIC_M_M_G1_PHASES	Details ...	44	0.275361	1.03845	0.389685	0.775261	1	1361	tags=77%, list=60%, signal=189%
REACTOME_TRANSMISSION_ACROSS_CHEMICAL_SYNAPSES	REACTOME_TRANSMISSION_ACROSS_CHEMICAL_SYNAPSES	Details ...	18	0.33107	1.02959	0.425532	0.778137	1	849	tags=44%, list=37%, signal=70%
REACTOME_ORC1_REMOVAL_FROM_CHROMATIN	REACTOME_ORC1_REMOVAL_FROM_CHROMATIN	Details ...	34	0.283457	1.02032	0.452774	0.782036	1	1466	tags=88%, list=65%, signal=246%
REACTOME_P53_DEPENDENT_G1_DNA_DAMAGE_RESPONSE	REACTOME_P53_DEPENDENT_G1_DNA_DAMAGE_RESPONSE	Details ...	34	0.283457	1.01237	0.404658	0.782653	1	1466	tags=88%, list=65%, signal=246%
REACTOME_ANTIGEN_PROCESSING_CROSS_PRESENTATION	REACTOME_ANTIGEN_PROCESSING_CROSS_PRESENTATION	Details ...	45	0.269008	1.01201	0.45134	0.765976	1	1471	tags=89%, list=65%, signal=248%
REACTOME_MITOCHONDRIAL_PROTEIN_IMPORT	REACTOME_MITOCHONDRIAL_PROTEIN_IMPORT	Details ...	17	0.341308	1.01166	0.442424	0.750047	1	1295	tags=88%, list=57%, signal=204%
REACTOME_CROSS_PRESENTATION_OF_SOLUBLE_EXOGENOUS_ANTIGENS_ENDOSOMES	REACTOME_CROSS_PRESENTATION_OF_SOLUBLE_EXOGENOUS_ANTIGENS_ENDOSOMES	Details ...	32	0.286557	1.00856	0.428144	0.741035	1	1466	tags=91%, list=65%, signal=253%
REACTOME_SCFSKP2_MEDIATED_DEGRADATION_OF_P27_P21	REACTOME_SCFSKP2_MEDIATED_DEGRADATION_OF_P27_P21	Details ...	35	0.285761	1.00773	0.430906	0.727489	1	1466	tags=89%, list=65%, signal=247%
REACTOME_DNA_REPLICATION	REACTOME_DNA_REPLICATION	Details ...	47	0.260744	1.00285	0.445667	0.723728	1	1361	tags=77%, list=60%, signal=188%
REACTOME_PYRUVATE_METABOLISM_AND_CITRIC_ACID_TCA_CYCLE	REACTOME_PYRUVATE_METABOLISM_AND_CITRIC_ACID_TCA_CYCLE	Details ...	16	0.340984	1.00022	0.459752	0.714537	1	242	tags=19%, list=11%, signal=21%
REACTOME_HEMOSTASIS	REACTOME_HEMOSTASIS	Details ...	81	0.222469	0.953326	0.536252	0.798455	1	458	tags=27%, list=20%, signal=33%
REACTOME_PROTEIN_FOLDING	REACTOME_PROTEIN_FOLDING	Details ...	20	0.304013	0.952739	0.51462	0.784257	1	676	tags=45%, list=30%, signal=64%
REACTOME_INTERFERON_ALPHA_BETA_SIGNALING	REACTOME_INTERFERON_ALPHA_BETA_SIGNALING	Details ...	17	0.313248	0.950577	0.513554	0.773653	1	300	tags=24%, list=13%, signal=27%
REACTOME_RNA_POL_II_PRE_TRANSCRIPTION_EVENTS	REACTOME_RNA_POL_II_PRE_TRANSCRIPTION_EVENTS	Details ...	17	0.312183	0.931184	0.539877	0.801214	1	1110	tags=65%, list=49%, signal=126%
REACTOME_PLATELET_ACTIVATION_SIGNALING_AND_AGGREGATION	REACTOME_PLATELET_ACTIVATION_SIGNALING_AND_AGGREGATION	Details ...	47	0.237967	0.921906	0.553846	0.806236	1	497	tags=32%, list=22%, signal=40%
REACTOME_SIGNALING_BY_PDGF	REACTOME_SIGNALING_BY_PDGF	Details ...	29	0.262083	0.902067	0.581818	0.83163	1	461	tags=31%, list=20%, signal=38%
REACTOME_L1CAM_INTERACTIONS	REACTOME_L1CAM_INTERACTIONS	Details ...	19	0.281674	0.882177	0.633758	0.855776	1	168	tags=16%, list=7%, signal=17%
REACTOME_HIV_LIFE_CYCLE	REACTOME_HIV_LIFE_CYCLE	Details ...	28	0.258599	0.87097	0.644412	0.862639	1	1323	tags=71%, list=58%, signal=169%
REACTOME_SIGNALING_BY_WNT	REACTOME_SIGNALING_BY_WNT	Details ...	38	0.232247	0.865622	0.630098	0.858694	1	1466	tags=84%, list=65%, signal=234%
REACTOME_RESPONSE_TO_ELEVATED_PLATELET_CYTOSOLIC_CA2_	REACTOME_RESPONSE_TO_ELEVATED_PLATELET_CYTOSOLIC_CA2_	Details ...	33	0.242142	0.854014	0.646802	0.866625	1	455	tags=33%, list=20%, signal=41%
REACTOME_LOSS_OF_NLP_FROM_MITOTIC_CENTROSOMES	REACTOME_LOSS_OF_NLP_FROM_MITOTIC_CENTROSOMES	Details ...	17	0.277773	0.835934	0.691718	0.885383	1	285	tags=24%, list=13%, signal=27%
REACTOME_RECRUITMENT_OF_MITOTIC_CENTROSOME_PROTEINS_AND_COMPLEXES	REACTOME_RECRUITMENT_OF_MITOTIC_CENTROSOME_PROTEINS_AND_COMPLEXES	Details ...	17	0.277773	0.823659	0.661631	0.892583	1	285	tags=24%, list=13%, signal=27%
REACTOME_LATE_PHASE_OF_HIV_LIFE_CYCLE	REACTOME_LATE_PHASE_OF_HIV_LIFE_CYCLE	Details ...	25	0.246008	0.800475	0.710843	0.918116	1	1550	tags=88%, list=68%, signal=275%
REACTOME_MITOTIC_G2_G2_M_PHASES	REACTOME_MITOTIC_G2_G2_M_PHASES	Details ...	18	0.261242	0.794269	0.719189	0.914329	1	285	tags=22%, list=13%, signal=25%
REACTOME_TRANSMEMBRANE_TRANSPORT_OF_SMALL_MOLECULES	REACTOME_TRANSMEMBRANE_TRANSPORT_OF_SMALL_MOLECULES	Details ...	33	0.21834	0.779808	0.773256	0.922218	1	44	tags=6%, list=2%, signal=6%
REACTOME_REGULATION_OF_MRNA_STABILITY_BY_PROTEINS_THAT_BIND_AU_RICH_ELEMENTS	REACTOME_REGULATION_OF_MRNA_STABILITY_BY_PROTEINS_THAT_BIND_AU_RICH_ELEMENTS	Details ...	42	0.207805	0.778392	0.798529	0.910512	1	1361	tags=74%, list=60%, signal=181%
REACTOME_NGF_SIGNALLING_VIA_TRKA_FROM_THE_PLASMA_MEMBRANE	REACTOME_NGF_SIGNALLING_VIA_TRKA_FROM_THE_PLASMA_MEMBRANE	Details ...	21	0.214939	0.668418	0.896605	1	1	757	tags=43%, list=33%, signal=64%
REACTOME_CELL_CYCLE_MITOTIC	REACTOME_CELL_CYCLE_MITOTIC	Details ...	70	0.15173	0.620684	0.952255	1	1	1361	tags=73%, list=60%, signal=177%
REACTOME_METABOLISM_OF_AMINO_ACIDS_AND_DERIVATIVES	REACTOME_METABOLISM_OF_AMINO_ACIDS_AND_DERIVATIVES	Details ...	51	0.15891	0.618703	0.95218	1	1	35	tags=4%, list=2%, signal=4%
REACTOME_CLASS_I_MHC_MEDIATED_ANTIGEN_PROCESSING_PRESENTATION	REACTOME_CLASS_I_MHC_MEDIATED_ANTIGEN_PROCESSING_PRESENTATION	Details ...	69	0.1483	0.617346	0.953191	1	1	1471	tags=77%, list=65%, signal=212%
REACTOME_DNA_REPAIR	REACTOME_DNA_REPAIR	Details ...	18	0.199229	0.597118	0.932824	1	1	1550	tags=83%, list=68%, signal=261%
REACTOME_ANTIGEN_PROCESSING_UBIQUITINATION_PROTEASOME_DEGRADATION	REACTOME_ANTIGEN_PROCESSING_UBIQUITINATION_PROTEASOME_DEGRADATION	Details ...	56	0.144301	0.568363	0.971583	1	1	1469	tags=77%, list=65%, signal=213%
REACTOME_ANTIVIRAL_MECHANISM_BY_IFN_STIMULATED_GENES	REACTOME_ANTIVIRAL_MECHANISM_BY_IFN_STIMULATED_GENES	Details ...	18	0.189335	0.566247	0.944277	1	1	203	tags=11%, list=9%, signal=12%
REACTOME_CELL_CYCLE	REACTOME_CELL_CYCLE	Details ...	77	0.130369	0.542015	0.985314	1	1	1361	tags=73%, list=60%, signal=176%
REACTOME_TRANSCRIPTION	REACTOME_TRANSCRIPTION	Details ...	42	0.143223	0.531479	0.972222	1	1	717	tags=31%, list=32%, signal=44%
REACTOME_PHOSPHOLIPID_METABOLISM	REACTOME_PHOSPHOLIPID_METABOLISM	Details ...	20	0.167012	0.521284	0.970904	1	1	363	tags=20%, list=16%, signal=24%
REACTOME_APOPTOSIS	REACTOME_APOPTOSIS	Details ...	59	0.132195	0.521037	0.989145	0.991226	1	172	tags=7%, list=8%, signal=7%
REACTOME_TOLL_RECEPTOR_CASCADES	REACTOME_TOLL_RECEPTOR_CASCADES	Details ...	18	0.167768	0.516165	0.972435	0.979889	1	505	tags=22%, list=22%, signal=28%

## Sheet: my_v_i_REACTOME_gsea_report_neg
NAME	GS<br> follow link to MSigDB	GS DETAILS	SIZE	ES	NES	NOM p-val	FDR q-val	FWER p-val	RANK AT MAX	LEADING EDGE
REACTOME_NONSENSE_MEDIATED_DECAY_ENHANCED_BY_THE_EXON_JUNCTION_COMPLEX	REACTOME_NONSENSE_MEDIATED_DECAY_ENHANCED_BY_THE_EXON_JUNCTION_COMPLEX	Details ...	86	-0.40037	-2.04634	0	0.0569379	0.042	1180	tags=95%, list=52%, signal=191%
REACTOME_PEPTIDE_CHAIN_ELONGATION	REACTOME_PEPTIDE_CHAIN_ELONGATION	Details ...	82	-0.384643	-1.93917	0.003861	0.0664421	0.098	1180	tags=95%, list=52%, signal=191%
REACTOME_3_UTR_MEDIATED_TRANSLATIONAL_REGULATION	REACTOME_3_UTR_MEDIATED_TRANSLATIONAL_REGULATION	Details ...	97	-0.352676	-1.82201	0	0.113644	0.229	1293	tags=96%, list=57%, signal=213%
REACTOME_DIABETES_PATHWAYS	REACTOME_DIABETES_PATHWAYS	Details ...	33	-0.423496	-1.74238	0.00977199	0.146379	0.359	169	tags=21%, list=7%, signal=23%
REACTOME_SRP_DEPENDENT_COTRANSLATIONAL_PROTEIN_TARGETING_TO_MEMBRANE	REACTOME_SRP_DEPENDENT_COTRANSLATIONAL_PROTEIN_TARGETING_TO_MEMBRANE	Details ...	93	-0.322676	-1.64525	0	0.217988	0.555	1293	tags=95%, list=57%, signal=211%
REACTOME_TRANSLATION	REACTOME_TRANSLATION	Details ...	116	-0.307901	-1.64216	0.0137615	0.184219	0.558	1293	tags=93%, list=57%, signal=205%
REACTOME_FORMATION_OF_THE_TERNARY_COMPLEX_AND_SUBSEQUENTLY_THE_43S_COMPLEX	REACTOME_FORMATION_OF_THE_TERNARY_COMPLEX_AND_SUBSEQUENTLY_THE_43S_COMPLEX	Details ...	44	-0.368551	-1.6325	0.0244755	0.167347	0.583	1242	tags=95%, list=55%, signal=207%
REACTOME_INTERFERON_GAMMA_SIGNALING	REACTOME_INTERFERON_GAMMA_SIGNALING	Details ...	18	-0.454976	-1.62974	0.0216718	0.147562	0.586	303	tags=44%, list=13%, signal=51%
REACTOME_INFLUENZA_VIRAL_RNA_TRANSCRIPTION_AND_REPLICATION	REACTOME_INFLUENZA_VIRAL_RNA_TRANSCRIPTION_AND_REPLICATION	Details ...	90	-0.310171	-1.60085	0.00829876	0.155924	0.65	1293	tags=94%, list=57%, signal=211%
REACTOME_ACTIVATION_OF_THE_MRNA_UPON_BINDING_OF_THE_CAP_BINDING_COMPLEX_AND_EIFS_AND_SUBSEQUENT_BINDING_TO_43S	REACTOME_ACTIVATION_OF_THE_MRNA_UPON_BINDING_OF_THE_CAP_BINDING_COMPLEX_AND_EIFS_AND_SUBSEQUENT_BINDING_TO_43S	Details ...	50	-0.341962	-1.54555	0.024735	0.192266	0.759	1242	tags=94%, list=55%, signal=203%
REACTOME_GENERIC_TRANSCRIPTION_PATHWAY	REACTOME_GENERIC_TRANSCRIPTION_PATHWAY	Details ...	16	-0.441736	-1.5083	0.0511364	0.21892	0.832	316	tags=38%, list=14%, signal=43%
REACTOME_SIGNALING_BY_FGFR_IN_DISEASE	REACTOME_SIGNALING_BY_FGFR_IN_DISEASE	Details ...	17	-0.443624	-1.48892	0.0584795	0.223357	0.872	351	tags=41%, list=15%, signal=48%
REACTOME_SIGNALING_BY_FGFR	REACTOME_SIGNALING_BY_FGFR	Details ...	15	-0.453424	-1.47699	0.0621302	0.219609	0.897	351	tags=40%, list=15%, signal=47%
REACTOME_GLYCOSAMINOGLYCAN_METABOLISM	REACTOME_GLYCOSAMINOGLYCAN_METABOLISM	Details ...	18	-0.392895	-1.37274	0.0997067	0.362706	0.98	77	tags=17%, list=3%, signal=17%
REACTOME_INNATE_IMMUNE_SYSTEM	REACTOME_INNATE_IMMUNE_SYSTEM	Details ...	36	-0.329874	-1.36824	0.09699	0.346033	0.982	397	tags=33%, list=18%, signal=40%
REACTOME_CYTOKINE_SIGNALING_IN_IMMUNE_SYSTEM	REACTOME_CYTOKINE_SIGNALING_IN_IMMUNE_SYSTEM	Details ...	53	-0.286856	-1.32518	0.0607143	0.398758	0.991	353	tags=30%, list=16%, signal=35%
REACTOME_BIOLOGICAL_OXIDATIONS	REACTOME_BIOLOGICAL_OXIDATIONS	Details ...	15	-0.400472	-1.29947	0.173797	0.423756	0.997	172	tags=27%, list=8%, signal=29%
REACTOME_SIGNALING_BY_ILS	REACTOME_SIGNALING_BY_ILS	Details ...	15	-0.389923	-1.27637	0.192	0.447751	0.999	194	tags=27%, list=9%, signal=29%
REACTOME_POST_TRANSLATIONAL_PROTEIN_MODIFICATION	REACTOME_POST_TRANSLATIONAL_PROTEIN_MODIFICATION	Details ...	28	-0.323539	-1.2633	0.184466	0.450561	1	300	tags=25%, list=13%, signal=28%
REACTOME_IMMUNE_SYSTEM	REACTOME_IMMUNE_SYSTEM	Details ...	176	-0.219114	-1.25496	0.0526316	0.442615	1	266	tags=18%, list=12%, signal=18%
REACTOME_INTERFERON_SIGNALING	REACTOME_INTERFERON_SIGNALING	Details ...	42	-0.274846	-1.17834	0.237013	0.593348	1	303	tags=26%, list=13%, signal=30%
REACTOME_UNFOLDED_PROTEIN_RESPONSE	REACTOME_UNFOLDED_PROTEIN_RESPONSE	Details ...	24	-0.308814	-1.16058	0.240356	0.608898	1	30	tags=8%, list=1%, signal=8%
REACTOME_SIGNALING_BY_NOTCH	REACTOME_SIGNALING_BY_NOTCH	Details ...	21	-0.308231	-1.12884	0.292135	0.666581	1	123	tags=14%, list=5%, signal=15%
REACTOME_ASPARAGINE_N_LINKED_GLYCOSYLATION	REACTOME_ASPARAGINE_N_LINKED_GLYCOSYLATION	Details ...	18	-0.320233	-1.11404	0.311978	0.678251	1	46	tags=11%, list=2%, signal=11%
REACTOME_SIGNALING_BY_TGF_BETA_RECEPTOR_COMPLEX	REACTOME_SIGNALING_BY_TGF_BETA_RECEPTOR_COMPLEX	Details ...	17	-0.327741	-1.09402	0.316265	0.706547	1	299	tags=24%, list=13%, signal=27%
REACTOME_SIGNALING_BY_NOTCH1	REACTOME_SIGNALING_BY_NOTCH1	Details ...	15	-0.320019	-1.03948	0.386167	0.831208	1	244	tags=20%, list=11%, signal=22%
REACTOME_ADAPTIVE_IMMUNE_SYSTEM	REACTOME_ADAPTIVE_IMMUNE_SYSTEM	Details ...	122	-0.185992	-1.02472	0.448598	0.842661	1	260	tags=16%, list=11%, signal=17%
REACTOME_METABOLISM_OF_RNA	REACTOME_METABOLISM_OF_RNA	Details ...	145	-0.179135	-1.01783	0.42	0.831587	1	1293	tags=86%, list=57%, signal=186%
REACTOME_SIGNALING_BY_INSULIN_RECEPTOR	REACTOME_SIGNALING_BY_INSULIN_RECEPTOR	Details ...	19	-0.278276	-0.994776	0.452778	0.867735	1	135	tags=11%, list=6%, signal=11%
REACTOME_METABOLISM_OF_MRNA	REACTOME_METABOLISM_OF_MRNA	Details ...	136	-0.176581	-0.964657	0.618557	0.924112	1	1202	tags=82%, list=53%, signal=165%
REACTOME_MRNA_PROCESSING	REACTOME_MRNA_PROCESSING	Details ...	55	-0.211038	-0.958027	0.505495	0.912057	1	1722	tags=98%, list=76%, signal=398%
REACTOME_PROCESSING_OF_CAPPED_INTRON_CONTAINING_PRE_MRNA	REACTOME_PROCESSING_OF_CAPPED_INTRON_CONTAINING_PRE_MRNA	Details ...	51	-0.2071	-0.935642	0.547445	0.942717	1	1722	tags=98%, list=76%, signal=398%
REACTOME_MRNA_SPLICING	REACTOME_MRNA_SPLICING	Details ...	49	-0.205544	-0.933485	0.555556	0.919804	1	1722	tags=98%, list=76%, signal=398%
REACTOME_METABOLISM_OF_LIPIDS_AND_LIPOPROTEINS	REACTOME_METABOLISM_OF_LIPIDS_AND_LIPOPROTEINS	Details ...	46	-0.205338	-0.906959	0.602649	0.958757	1	488	tags=37%, list=22%, signal=46%
REACTOME_S_PHASE	REACTOME_S_PHASE	Details ...	41	-0.19867	-0.881284	0.671053	0.994403	1	1662	tags=95%, list=73%, signal=350%
REACTOME_METABOLISM_OF_CARBOHYDRATES	REACTOME_METABOLISM_OF_CARBOHYDRATES	Details ...	39	-0.20155	-0.856229	0.673981	1	1	239	tags=15%, list=11%, signal=17%
REACTOME_G1_S_TRANSITION	REACTOME_G1_S_TRANSITION	Details ...	40	-0.197073	-0.845028	0.727829	1	1	1662	tags=95%, list=73%, signal=349%
REACTOME_SIGNALING_BY_THE_B_CELL_RECEPTOR_BCR	REACTOME_SIGNALING_BY_THE_B_CELL_RECEPTOR_BCR	Details ...	47	-0.187873	-0.834224	0.771513	1	1	110	tags=9%, list=5%, signal=9%
REACTOME_DOWNSTREAM_SIGNALING_EVENTS_OF_B_CELL_RECEPTOR_BCR	REACTOME_DOWNSTREAM_SIGNALING_EVENTS_OF_B_CELL_RECEPTOR_BCR	Details ...	42	-0.192064	-0.826975	0.717172	1	1	70	tags=7%, list=3%, signal=7%
REACTOME_DOWNSTREAM_SIGNAL_TRANSDUCTION	REACTOME_DOWNSTREAM_SIGNAL_TRANSDUCTION	Details ...	16	-0.248644	-0.821413	0.692982	0.99072	1	332	tags=31%, list=15%, signal=36%
REACTOME_MHC_CLASS_II_ANTIGEN_PRESENTATION	REACTOME_MHC_CLASS_II_ANTIGEN_PRESENTATION	Details ...	28	-0.202228	-0.816269	0.705521	0.976172	1	216	tags=18%, list=10%, signal=19%
REACTOME_ACTIVATION_OF_NF_KAPPAB_IN_B_CELLS	REACTOME_ACTIVATION_OF_NF_KAPPAB_IN_B_CELLS	Details ...	37	-0.190021	-0.813503	0.747541	0.958562	1	1662	tags=95%, list=73%, signal=348%
REACTOME_P75_NTR_RECEPTOR_MEDIATED_SIGNALLING	REACTOME_P75_NTR_RECEPTOR_MEDIATED_SIGNALLING	Details ...	17	-0.241751	-0.803847	0.700272	0.951844	1	1322	tags=88%, list=58%, signal=210%
REACTOME_CYCLIN_E_ASSOCIATED_EVENTS_DURING_G1_S_TRANSITION_	REACTOME_CYCLIN_E_ASSOCIATED_EVENTS_DURING_G1_S_TRANSITION_	Details ...	37	-0.190395	-0.792503	0.781145	0.949149	1	1662	tags=95%, list=73%, signal=348%
REACTOME_RNA_POL_I_RNA_POL_III_AND_MITOCHONDRIAL_TRANSCRIPTION	REACTOME_RNA_POL_I_RNA_POL_III_AND_MITOCHONDRIAL_TRANSCRIPTION	Details ...	16	-0.227106	-0.790258	0.733524	0.931215	1	27	tags=6%, list=1%, signal=6%
REACTOME_MITOTIC_G1_G1_S_PHASES	REACTOME_MITOTIC_G1_G1_S_PHASES	Details ...	42	-0.160732	-0.716132	0.873333	1	1	1662	tags=93%, list=73%, signal=341%
REACTOME_FACTORS_INVOLVED_IN_MEGAKARYOCYTE_DEVELOPMENT_AND_PLATELET_PRODUCTION	REACTOME_FACTORS_INVOLVED_IN_MEGAKARYOCYTE_DEVELOPMENT_AND_PLATELET_PRODUCTION	Details ...	16	-0.207848	-0.697749	0.853731	1	1	479	tags=38%, list=21%, signal=47%
REACTOME_ACTIVATION_OF_CHAPERONE_GENES_BY_XBP1S	REACTOME_ACTIVATION_OF_CHAPERONE_GENES_BY_XBP1S	Details ...	16	-0.212073	-0.69685	0.864499	0.992203	1	354	tags=25%, list=16%, signal=29%
REACTOME_SIGNALING_BY_ERBB2	REACTOME_SIGNALING_BY_ERBB2	Details ...	15	-0.202857	-0.670049	0.886628	0.999142	1	1110	tags=80%, list=49%, signal=156%
REACTOME_SIGNALING_BY_EGFR_IN_CANCER	REACTOME_SIGNALING_BY_EGFR_IN_CANCER	Details ...	18	-0.188102	-0.669279	0.870879	0.979902	1	322	tags=22%, list=14%, signal=26%
REACTOME_MRNA_SPLICING_MINOR_PATHWAY	REACTOME_MRNA_SPLICING_MINOR_PATHWAY	Details ...	23	-0.178619	-0.643236	0.887906	0.980406	1	1868	tags=100%, list=82%, signal=561%
REACTOME_METABOLISM_OF_PROTEINS	REACTOME_METABOLISM_OF_PROTEINS	Details ...	180	-0.109195	-0.630953	0.987879	0.970328	1	2041	tags=100%, list=90%, signal=920%
REACTOME_RNA_POL_II_TRANSCRIPTION	REACTOME_RNA_POL_II_TRANSCRIPTION	Details ...	31	-0.147519	-0.592419	0.962848	0.975273	1	1939	tags=100%, list=85%, signal=680%
REACTOME_SIGNALLING_BY_NGF	REACTOME_SIGNALLING_BY_NGF	Details ...	36	-0.133019	-0.542442	0.974922	0.977372	1	70	tags=6%, list=3%, signal=6%

## Sheet: my_v_i_HALLMARK_gsea_report_pos
NAME	GS<br> follow link to MSigDB	GS DETAILS	SIZE	ES	NES	NOM p-val	FDR q-val	FWER p-val	RANK AT MAX	LEADING EDGE
HALLMARK_EPITHELIAL_MESENCHYMAL_TRANSITION	HALLMARK_EPITHELIAL_MESENCHYMAL_TRANSITION	Details ...	118	0.380351	1.7229	0.00130548	0.166968	0.327	377	tags=36%, list=17%, signal=40%
HALLMARK_OXIDATIVE_PHOSPHORYLATION	HALLMARK_OXIDATIVE_PHOSPHORYLATION	Details ...	121	0.309512	1.4017	0.0566535	0.516253	0.914	1269	tags=77%, list=56%, signal=165%
HALLMARK_APICAL_JUNCTION	HALLMARK_APICAL_JUNCTION	Details ...	49	0.315111	1.22894	0.181435	0.783794	0.996	561	tags=45%, list=25%, signal=58%
HALLMARK_KRAS_SIGNALING_UP	HALLMARK_KRAS_SIGNALING_UP	Details ...	35	0.336024	1.18852	0.245179	0.693228	0.999	157	tags=20%, list=7%, signal=21%
HALLMARK_MYOGENESIS	HALLMARK_MYOGENESIS	Details ...	43	0.317189	1.16948	0.249655	0.602869	1	391	tags=35%, list=17%, signal=41%
HALLMARK_PROTEIN_SECRETION	HALLMARK_PROTEIN_SECRETION	Details ...	29	0.337733	1.16794	0.261834	0.5046	1	761	tags=48%, list=34%, signal=72%
HALLMARK_PI3K_AKT_MTOR_SIGNALING	HALLMARK_PI3K_AKT_MTOR_SIGNALING	Details ...	25	0.329757	1.08331	0.349275	0.593167	1	947	tags=60%, list=42%, signal=102%
HALLMARK_DNA_REPAIR	HALLMARK_DNA_REPAIR	Details ...	44	0.276786	1.0538	0.385185	0.576429	1	997	tags=61%, list=44%, signal=107%
HALLMARK_MITOTIC_SPINDLE	HALLMARK_MITOTIC_SPINDLE	Details ...	35	0.274983	0.992277	0.475645	0.626027	1	479	tags=31%, list=21%, signal=39%
HALLMARK_TGF_BETA_SIGNALING	HALLMARK_TGF_BETA_SIGNALING	Details ...	21	0.25257	0.804	0.7	0.892747	1	497	tags=38%, list=22%, signal=48%
HALLMARK_E2F_TARGETS	HALLMARK_E2F_TARGETS	Details ...	33	0.226493	0.786782	0.751453	0.836586	1	788	tags=48%, list=35%, signal=73%
HALLMARK_INTERFERON_ALPHA_RESPONSE	HALLMARK_INTERFERON_ALPHA_RESPONSE	Details ...	28	0.231224	0.778888	0.760709	0.777938	1	245	tags=18%, list=11%, signal=20%

## Sheet: my_v_i_HALLMARK_gsea_report_neg
NAME	GS<br> follow link to MSigDB	GS DETAILS	SIZE	ES	NES	NOM p-val	FDR q-val	FWER p-val	RANK AT MAX	LEADING EDGE
HALLMARK_TNFA_SIGNALING_VIA_NFKB	HALLMARK_TNFA_SIGNALING_VIA_NFKB	Details ...	80	-0.719253	-3.64495	0	0	0	234	tags=63%, list=10%, signal=67%
HALLMARK_APOPTOSIS	HALLMARK_APOPTOSIS	Details ...	64	-0.502362	-2.39673	0	0	0	303	tags=45%, list=13%, signal=51%
HALLMARK_INFLAMMATORY_RESPONSE	HALLMARK_INFLAMMATORY_RESPONSE	Details ...	39	-0.528548	-2.28946	0	0	0	322	tags=56%, list=14%, signal=65%
HALLMARK_INTERFERON_GAMMA_RESPONSE	HALLMARK_INTERFERON_GAMMA_RESPONSE	Details ...	47	-0.516293	-2.28698	0	0	0	346	tags=47%, list=15%, signal=54%
HALLMARK_IL2_STAT5_SIGNALING	HALLMARK_IL2_STAT5_SIGNALING	Details ...	47	-0.488091	-2.2034	0	0	0	262	tags=45%, list=12%, signal=49%
HALLMARK_ESTROGEN_RESPONSE_LATE	HALLMARK_ESTROGEN_RESPONSE_LATE	Details ...	41	-0.504058	-2.18052	0.003125	0.000358974	0.001	291	tags=49%, list=13%, signal=55%
HALLMARK_HYPOXIA	HALLMARK_HYPOXIA	Details ...	77	-0.433238	-2.11973	0	0.000879121	0.003	322	tags=42%, list=14%, signal=47%
HALLMARK_ESTROGEN_RESPONSE_EARLY	HALLMARK_ESTROGEN_RESPONSE_EARLY	Details ...	36	-0.516144	-2.10542	0	0.00108741	0.004	302	tags=50%, list=13%, signal=57%
HALLMARK_COAGULATION	HALLMARK_COAGULATION	Details ...	40	-0.4699	-2.05599	0	0.0019985	0.008	210	tags=43%, list=9%, signal=46%
HALLMARK_ANDROGEN_RESPONSE	HALLMARK_ANDROGEN_RESPONSE	Details ...	37	-0.484887	-2.02291	0	0.00248396	0.011	241	tags=38%, list=11%, signal=42%
HALLMARK_XENOBIOTIC_METABOLISM	HALLMARK_XENOBIOTIC_METABOLISM	Details ...	49	-0.432307	-1.98631	0	0.00281834	0.014	390	tags=45%, list=17%, signal=53%
HALLMARK_UV_RESPONSE_UP	HALLMARK_UV_RESPONSE_UP	Details ...	45	-0.43459	-1.94136	0	0.00349587	0.019	261	tags=33%, list=12%, signal=37%
HALLMARK_COMPLEMENT	HALLMARK_COMPLEMENT	Details ...	42	-0.437008	-1.89485	0	0.00438238	0.025	210	tags=33%, list=9%, signal=36%
HALLMARK_UV_RESPONSE_DN	HALLMARK_UV_RESPONSE_DN	Details ...	38	-0.431518	-1.83287	0.0106762	0.0075606	0.044	364	tags=50%, list=16%, signal=59%
HALLMARK_IL6_JAK_STAT3_SIGNALING	HALLMARK_IL6_JAK_STAT3_SIGNALING	Details ...	18	-0.497712	-1.71864	0.01983	0.0186731	0.11	332	tags=67%, list=15%, signal=77%
HALLMARK_G2M_CHECKPOINT	HALLMARK_G2M_CHECKPOINT	Details ...	33	-0.40042	-1.6641	0.00961539	0.0252735	0.161	313	tags=30%, list=14%, signal=35%
HALLMARK_CHOLESTEROL_HOMEOSTASIS	HALLMARK_CHOLESTEROL_HOMEOSTASIS	Details ...	23	-0.404656	-1.46996	0.0685714	0.0785131	0.442	346	tags=35%, list=15%, signal=41%
HALLMARK_UNFOLDED_PROTEIN_RESPONSE	HALLMARK_UNFOLDED_PROTEIN_RESPONSE	Details ...	42	-0.334876	-1.4691	0.0517241	0.0741513	0.442	311	tags=26%, list=14%, signal=30%
HALLMARK_REACTIVE_OXIGEN_SPECIES_PATHWAY	HALLMARK_REACTIVE_OXIGEN_SPECIES_PATHWAY	Details ...	17	-0.420129	-1.42914	0.129794	0.0875967	0.513	417	tags=47%, list=18%, signal=57%
HALLMARK_ALLOGRAFT_REJECTION	HALLMARK_ALLOGRAFT_REJECTION	Details ...	34	-0.309596	-1.28324	0.15047	0.193428	0.827	301	tags=29%, list=13%, signal=33%
HALLMARK_PEROXISOME	HALLMARK_PEROXISOME	Details ...	18	-0.344411	-1.20688	0.267857	0.260925	0.911	382	tags=39%, list=17%, signal=46%
HALLMARK_P53_PATHWAY	HALLMARK_P53_PATHWAY	Details ...	58	-0.241646	-1.1362	0.251908	0.340553	0.964	264	tags=28%, list=12%, signal=30%
HALLMARK_ADIPOGENESIS	HALLMARK_ADIPOGENESIS	Details ...	65	-0.228472	-1.11313	0.291513	0.363874	0.978	354	tags=26%, list=16%, signal=30%
HALLMARK_GLYCOLYSIS	HALLMARK_GLYCOLYSIS	Details ...	46	-0.20413	-0.918476	0.614286	0.692826	1	325	tags=22%, list=14%, signal=25%
HALLMARK_HEME_METABOLISM	HALLMARK_HEME_METABOLISM	Details ...	34	-0.194363	-0.791039	0.787425	0.887594	1	447	tags=35%, list=20%, signal=43%
HALLMARK_MTORC1_SIGNALING	HALLMARK_MTORC1_SIGNALING	Details ...	64	-0.164157	-0.783056	0.827586	0.864912	1	432	tags=28%, list=19%, signal=34%
HALLMARK_MYC_TARGETS_V1	HALLMARK_MYC_TARGETS_V1	Details ...	105	-0.149153	-0.77731	0.875598	0.839889	1	1218	tags=77%, list=54%, signal=159%
HALLMARK_FATTY_ACID_METABOLISM	HALLMARK_FATTY_ACID_METABOLISM	Details ...	42	-0.172947	-0.75483	0.845679	0.836979	1	382	tags=24%, list=17%, signal=28%
