# Supplementary material for: Cross-Species Single-Cell Analysis of Pancreatic Ductal Adenocarcinoma Reveals Antigen-Presenting Cancer-Associated Fibroblasts
Source: Oxford University Press journal article supplement (doi:10.1158/2159-8290.cd-19-0094), 2019-06-13
Supplement: 21598290cd190094-sup-215864_2_supp_5552229_ps91bp.xlsx [file 21598290cd190094-sup-215864_2_supp_5552229_ps91bp.xlsx]

## Sheet: mrsSigMole_pvalue
Proteins	Activity	pvalue	FDR
TGFBR3	4.58273	4.58936e-06	0.0013596
YWHAE	4.50704	6.57369e-06	0.00155413
CD74	4.37248	1.22841e-05	0.00155413
CD164	4.36077	1.29608e-05	0.00155413
TGFBR2	4.35732	1.31667e-05	0.00155413
FCGRT	4.27487	1.91248e-05	0.00155413
ADCY3	4.27149	1.94168e-05	0.00155413
PER1	4.25491	2.09135e-05	0.00155413
PPP1R15B	4.24613	2.17495e-05	0.00155413
CRABP2	4.24494	2.18647e-05	0.00155413
DPYSL2	4.22772	2.36071e-05	0.00155413
ARID5B	4.20531	2.60722e-05	0.00162608
PTGES	4.18754	2.82e-05	0.0016601
PDPN	4.16562	3.10508e-05	0.0016601
IL6ST	4.14409	3.41169e-05	0.0016601
THBS1	4.12587	3.69333e-05	0.0016601
IFI27	4.12361	3.72986e-05	0.0016601
NAMPT	4.1189	3.80678e-05	0.0016601
ABL1	4.11199	3.92259e-05	0.0016601
NGF	4.08898	4.33275e-05	0.00177045
CCL2	4.07002	4.70089e-05	0.0018274
YWHAG	4.0661	4.78055e-05	0.0018274
AGTR1	4.05134	5.09251e-05	0.00188582
SRGAP1	4.04052	5.33319e-05	0.0019151
PER2	4.00821	6.11812e-05	0.00200272
TIPARP	4.00471	6.20925e-05	0.00200272
PTPRS	3.98311	6.80204e-05	0.00200272
SOD2	3.98061	6.87386e-05	0.00200272
TNFSF10	3.97455	7.05117e-05	0.00200272
TOB1	3.96188	7.43626e-05	0.00200272
PLPP3	3.95584	7.62658e-05	0.00200833
F3	3.94195	8.08219e-05	0.00208204
ADAMTS1	3.91699	8.96604e-05	0.00224678
ADAM17	3.91146	9.17396e-05	0.00224678
SPSB1	3.90841	9.2905e-05	0.00224678
CD44	3.89045	0.000100057	0.00237134
RHOB	3.88371	0.000102875	0.00238904
ANGPTL4	3.87448	0.000106851	0.00238904
WISP2	3.86406	0.000111516	0.0024259
IFI6	3.86171	0.000112595	0.0024259
GJA1	3.84097	0.000122549	0.00250453
S100A6	3.83828	0.000123901	0.00250453
IL6	3.8367	0.000124698	0.00250453
TRIB1	3.81212	0.000137781	0.00256726
DUSP1	3.80891	0.000139583	0.00256726
APOE	3.80672	0.00014082	0.00256726
TNFAIP6	3.79413	0.000148164	0.00262281
GADD45B	3.79391	0.000148294	0.00262281
IL1R1	3.77758	0.000158357	0.00271363
INSR	3.77061	0.000162848	0.00271795
FKBP1A	3.76034	0.000169682	0.00275443
RPS6KA3	3.70991	0.000207336	0.00312928
VAPA	3.70834	0.000208618	0.00312928
FAM126A	3.70158	0.000214261	0.00317374
CDKN1A	3.68122	0.000232118	0.00334696
ABL2	3.6787	0.000234428	0.00334696
PDK4	3.67397	0.00023881	0.00336892
LSP1	3.6565	0.000255678	0.00356445
S100A10	3.65325	0.000258946	0.00356803
RAN	3.64113	0.000271444	0.00363597
ARF6	3.6357	0.000277229	0.00363597
GEM	3.63143	0.000281853	0.00363597
ANXA1	3.62616	0.00028767	0.00363597
CXCL14	3.62551	0.000288388	0.00363597
CXCL2	3.62548	0.000288423	0.00363597
NGFR	3.61951	0.000295163	0.00368177
CDC42SE1	3.59981	0.000318455	0.0038507
PLPP1	3.59477	0.000324673	0.0038735
UTP11	3.59301	0.000326878	0.0038735
RAMP2	3.58621	0.000335524	0.003898
TRIP10	3.56827	0.000359349	0.00409451
GPC3	3.56262	0.000367171	0.00414378
UBC	3.55909	0.000372146	0.00415612
RGS10	3.55024	0.000384877	0.00422296
ACKR3	3.54581	0.000391405	0.00425519
CHRDL1	3.53491	0.00040792	0.00431837
SLC20A1	3.5312	0.000413674	0.00431837
TNFAIP3	3.53008	0.000415439	0.00431837
BDKRB1	3.52573	0.000422316	0.00434789
AKAP12	3.52303	0.000426642	0.00434789
BDKRB2	3.51652	0.000437246	0.00434789
PTGIS	3.51405	0.000441334	0.00434789
INTS6	3.51028	0.000447631	0.00434789
FLRT2	3.50466	0.000457182	0.00440456
COLEC12	3.49846	0.000467951	0.00447132
OSMR	3.49588	0.000472508	0.00447132
DCLK1	3.49423	0.000475432	0.00447132
CSNK1A1	3.48326	0.000495351	0.00462198
ITGA5	3.47749	0.000506132	0.00468568
PTPRG	3.47134	0.00051786	0.00472049
CXCL3	3.45584	0.000548571	0.00488764
ARL4D	3.44822	0.000564285	0.00494829
ANK2	3.44389	0.000573413	0.00495982
CTSH	3.43393	0.000594894	0.00502448
NPR1	3.43259	0.000597849	0.00502448
AXL	3.41579	0.000635961	0.00521239
BAIAP2	3.41501	0.000637803	0.00521239
RGS2	3.41205	0.000644759	0.00522449
F10	3.40755	0.00065549	0.00522449
GSN	3.40727	0.000656154	0.00522449
MRGPRF	3.40194	0.000669099	0.00525088
IL11RA	3.3742	0.000740297	0.0056887
MAPKAPK2	3.37039	0.000750615	0.0056887
HNRNPK	3.3696	0.000752776	0.0056887
IL6R	3.36956	0.000752895	0.0056887
CD34	3.36926	0.000753693	0.0056887
DNAJA1	3.36152	0.000775137	0.00574471
SPTBN1	3.36045	0.000778154	0.00574471
SDCBP	3.35491	0.000793896	0.00577157
PDGFRA	3.3513	0.000804329	0.00581177
INSIG1	3.34841	0.000812756	0.00583027
CSF1	3.34046	0.00083641	0.00583027
IGFBP6	3.32039	0.000898916	0.00615731
DDX3X	3.31092	0.000929907	0.00627109
TNFRSF10B	3.31019	0.00093231	0.00627109
FGFR1	3.30857	0.000937745	0.00627109
PPP1R15A	3.30635	0.000945206	0.00627109
LRP1	3.30633	0.000945266	0.00627109
MAP2K3	3.30573	0.000947278	0.00627109
RHEB	3.30119	0.000962762	0.00630541
CLU	3.29842	0.000972294	0.00630541
ADM	3.28791	0.00100935	0.00638092
PPP2R2A	3.28647	0.00101451	0.00638092
LGALS3BP	3.28558	0.00101772	0.00638092
GPRC5A	3.27699	0.00104919	0.00642928
TSPAN8	3.27152	0.00106971	0.00648599
MAP3K8	3.26552	0.00109261	0.00657232
NFKBIA	3.26241	0.00110469	0.00661141
TNFRSF1A	3.25745	0.00112419	0.00661379
SPRY1	3.24694	0.00116653	0.00680845
RAB7A	3.24559	0.00117209	0.00680845
FCER1G	3.22426	0.00126298	0.00716089
FGF7	3.21708	0.001295	0.00724264
RASD1	3.21692	0.00129573	0.00724264
SPRY2	3.20901	0.00133194	0.00737548
SOCS3	3.2035	0.00135767	0.0074638
FSTL3	3.19998	0.00137438	0.00747081
RERG	3.18857	0.00142978	0.00753459
DST	3.18712	0.00143698	0.00753459
SMOC2	3.17285	0.00150953	0.00777734
TYROBP	3.15714	0.00159326	0.00806679
EGFR	3.1562	0.0015984	0.00806679
RRAS2	3.152	0.00162156	0.00813389
PDE4D	3.14862	0.00164041	0.00816758
ABCC9	3.13996	0.00168972	0.00828433
APLP2	3.13297	0.00173047	0.00833581
NDFIP2	3.13041	0.0017456	0.0083399
TRIO	3.12636	0.00176988	0.00835579
GADD45G	3.12267	0.0017922	0.00837036
HOMER1	3.12235	0.00179415	0.00837036
SH3BP5	3.11574	0.00183481	0.00842734
SHOC2	3.1121	0.00185759	0.00846631
ATP2A2	3.10782	0.00188474	0.00851175
UBE2D3	3.09295	0.00198174	0.00879537
DUSP6	3.09169	0.00199018	0.00879985
NTRK2	3.07541	0.00210212	0.00907129
RAP1B	3.07498	0.00210515	0.00907129
YWHAZ	3.06766	0.0021574	0.00916313
TNXB	3.05878	0.00222242	0.00937213
SELENOS	3.05347	0.00226213	0.00950576
FSTL1	3.05031	0.00228606	0.00953866
CBLB	3.03558	0.00240076	0.0097428
PI4KB	3.0252	0.00248472	0.00985386
EDNRB	3.025	0.00248633	0.00985386
HMGCR	3.01299	0.00258687	0.0101842
SIK1	3.01096	0.00260427	0.0102187
CYCS	2.99113	0.00277947	0.0107989
FYN	2.97875	0.00289426	0.0112082
CD47	2.97656	0.00291506	0.011252
IPO7	2.97291	0.00294994	0.0113139
PGRMC2	2.97033	0.00297478	0.0113348
RHOQ	2.96387	0.00303798	0.0115327
WSB1	2.96304	0.00304618	0.0115327
CPE	2.95885	0.0030879	0.0115708
VEGFA	2.95855	0.0030909	0.0115708
CSNK1D	2.95525	0.0031242	0.0116421
CAT	2.93846	0.00329846	0.0121387
ARAP1	2.93067	0.00338233	0.0123492
TXN	2.92521	0.00344222	0.0125124
PWP2	2.9192	0.00350936	0.012649
RAB21	2.91631	0.00354201	0.0126806
GSPT1	2.89493	0.00379238	0.0133163
MAP3K2	2.89328	0.00381238	0.0133163
G3BP1	2.89261	0.00382053	0.0133163
HSPA5	2.8926	0.0038207	0.0133163
IFNGR1	2.87243	0.00407324	0.0138825
NUDT4	2.84407	0.00445411	0.0148183
CD81	2.80322	0.00505946	0.0164259
PRKCI	2.75077	0.00594553	0.0186388
LY6E	2.73646	0.00621039	0.0192149
RGS1	2.73175	0.00629998	0.0193909
MTCH1	2.72451	0.00643969	0.0197695
ARL4A	2.7187	0.00655389	0.0200681
HIPK3	2.71394	0.00664881	0.0201505
CLIC2	2.69053	0.00713393	0.0213478
DLC1	2.67878	0.00738913	0.0218944
ASB1	2.65939	0.00782815	0.0229613
CCDC47	2.62826	0.00858223	0.0246246
UBE2B	2.59662	0.00941458	0.0262652
GAS1	2.59095	0.00957108	0.0264664
PTPN1	2.58898	0.00962617	0.0264664
PPP2CA	2.53782	0.0111546	0.0294856
HSPD1	2.531	0.0113737	0.029797
ARL5B	2.5297	0.0114159	0.029797
SOCS2	2.51293	0.0119734	0.030662
CHP1	2.50673	0.0121855	0.0310456
TSPYL2	2.50507	0.0122428	0.0310658
PDZD8	2.5007	0.012395	0.0313178
RAB22A	2.49984	0.012425	0.0313269
MAP2K1	2.46535	0.0136878	0.033528
USP33	2.40619	0.0161201	0.038011
PDCD4	2.40586	0.0161346	0.038011
LPAR1	2.40356	0.0162364	0.0381748
MESD	2.40039	0.0163774	0.0384301
DDAH2	2.35901	0.018324	0.0420813
DPYSL3	2.34454	0.0190507	0.0434137
CXXC5	2.33901	0.0193349	0.0438925
ABCA1	2.33018	0.0197968	0.0446842
ARHGAP29	2.32339	0.0201581	0.0453952
SKI	2.32283	0.0201884	0.0453952
MGLL	2.30438	0.0212014	0.0471364
CNOT9	2.27986	0.022616	0.049814
DUSP2	2.26056	0.0237866	0.052102
GNB1	2.25545	0.0241049	0.0524115
APPL2	2.24194	0.0249651	0.0538865
VCP	2.23283	0.0255602	0.0548595
CTNNAL1	2.22457	0.02611	0.0554487
PPP1R1B	2.21283	0.0269097	0.0568413
CD83	2.20398	0.0275257	0.0577309
SIAH2	2.1733	0.029758	0.0609036
PIP5K1A	2.15208	0.0313911	0.0632628
SMURF2	2.07221	0.038246	0.074788
ADAM9	2.06204	0.0392044	0.0761593
SKIL	2.05851	0.0395408	0.0765665
GNAQ	2.03438	0.0419135	0.0808917
CFLAR	2.02822	0.0425374	0.0816965
TP53BP2	1.99574	0.0459623	0.0861794
CXCR4	1.96641	0.0492518	0.0910505
CDKN1C	1.92969	0.0536456	0.0978
PRKAR1A	1.89493	0.0581021	0.104637
APPL1	1.86987	0.0615013	0.110256
MIB2	1.84643	0.0648296	0.114638
ATP6AP2	1.76041	0.0783389	0.134734
PXN	1.75696	0.0789252	0.135545
CSNK2A2	1.74334	0.081275	0.138977
PTN	1.74143	0.0816082	0.139345
TMEM9B	1.73227	0.0832256	0.141903
ARHGEF40	1.70147	0.088855	0.148719
NECTIN2	1.69831	0.0894491	0.149105
PLAT	1.69824	0.0894631	0.149105
NDEL1	1.6169	0.105901	0.173572
GNAI3	1.58318	0.11338	0.184048
IL10RB	1.56139	0.118431	0.191461
NF1	1.55092	0.12092	0.194524
DOK5	1.53582	0.124582	0.199078
MAPK6	1.53553	0.124654	0.199078
UBR5	1.53287	0.125307	0.19985
TANK	1.52707	0.126743	0.201868
NSMAF	1.4881	0.136725	0.216314
UBE2N	1.45385	0.145988	0.227626
MAP2K2	1.44823	0.147551	0.22946
HRH1	1.42251	0.154878	0.239283
INPP1	1.41874	0.155976	0.240353
SIRT1	1.33587	0.181592	0.274824
PRMT1	1.32897	0.183858	0.277898
TBC1D15	1.3166	0.187974	0.283757
MPZL1	1.31148	0.189697	0.285436
PARP1	1.31114	0.189809	0.285436
NFKBIB	1.29556	0.195129	0.293064
SCAP	1.28555	0.1986	0.297523
PRKAA1	1.27802	0.201243	0.301102
LATS2	1.27578	0.202033	0.301903
OGT	1.27396	0.202677	0.302484
ACIN1	1.20223	0.229275	0.340038
TBK1	1.17385	0.240453	0.355727
TRAF4	1.17113	0.241545	0.356897
RAB1A	1.16456	0.244199	0.35992
SAV1	1.15438	0.248346	0.364867
RGL1	1.13121	0.257966	0.376929
RGL2	1.11101	0.266564	0.387106
ANXA5	1.03536	0.300499	0.429769
GRK5	1.03368	0.301285	0.430147
MED16	1.00472	0.315034	0.449236
MDM2	0.996947	0.31879	0.454046
IL15RA	0.931291	0.351703	0.497931
AP3S1	0.928883	0.35295	0.4991
SH3GL1	0.924901	0.355017	0.501425
CASP3	0.903738	0.366134	0.516511
GNG12	0.893953	0.371347	0.52262
PPP3CB	0.87063	0.383956	0.539086
SLK	0.861845	0.388773	0.544558
GPR4	0.798491	0.424586	0.590533
RASSF1	0.794402	0.426962	0.593141
PPP2R5C	0.776459	0.437478	0.607039
WLS	0.769917	0.441349	0.61098
NRAS	0.71045	0.477425	0.656321
COL4A3BP	0.638669	0.523038	0.713234
SH3RF1	0.546264	0.584885	0.793916
MAP4K4	0.522	0.60167	0.815765
BID	0.519011	0.603753	0.817654
AKAP17A	0.449408	0.653137	0.881512
ECE1	0.366536	0.713965	0.955987
MED30	0.33339	0.73884	0.987064
OR51E1	0.296805	0.766616	1
SLC22A17	0.290437	0.771482	1
TLE4	0.265763	0.790422	1
RRAGC	0.208346	0.834959	1
BCAM	0.197274	0.843613	1
SIGIRR	0.16672	0.86759	1
MYO9B	0.15781	0.874607	1
FAS	0.154703	0.877055	1
AZI2	0.14151	0.887467	1
COPS3	0.114911	0.908516	1
C18orf32	0.089039	0.929051	1
RBM14	0.0224227	0.982111	1
PLXND1	0	1	1
PDK2	0	1	1
AGK	0	1	1
ADIPOR2	0	1	1
CYTH3	0	1	1
PKD1	0	1	1
MED24	0	1	1
NISCH	0	1	1
APBA3	0	1	1
RABGAP1	0	1	1
HGF	0	1	1
BIRC3	0	1	1
AKAP11	0	1	1
BAK1	0	1	1
	0	1	1
AIFM2	0	1	1
ARHGAP6	0	1	1
KITLG	0	1	1
TAB2	0	1	1
SPHK2	0	1	1
CDON	0	1	1
SLC12A2	0	1	1
DGKA	0	1	1
TBC1D1	0	1	1
PDE4A	0	1	1
ARFGEF1	0	1	1
MYO9A	0	1	1
PDK3	0	1	1
RASGRP2	0	1	1
PPP2R5B	0	1	1
FGF10	0	1	1
NCK2	0	1	1
SNX13	0	1	1
PRKACA	0	1	1
RHOBTB1	0	1	1
FBXW11	0	1	1
TIPIN	0	1	1
MLH1	0	1	1
MAP2K7	0	1	1
PPP1R12B	0	1	1
IL4R	0	1	1
APBB1IP	0	1	1
MKNK1	0	1	1
MOK	0	1	1
STRADB	0	1	1
ERC1	0	1	1
NCOA1	0	1	1
UIMC1	0	1	1
REM1	0	1	1
MAPKAPK5	0	1	1
BRAP	0	1	1
IRAK3	0	1	1
PLEKHG2	0	1	1
NLRP1	0	1	1
RGS17	0	1	1
SEMA6A	0	1	1
SRPK1	0	1	1
BCL2L13	0	1	1
GTPBP1	0	1	1
HMOX1	0	1	1
EFS	0	1	1
STK4	0	1	1
DIDO1	0	1	1
PIGU	0	1	1
MIB1	0	1	1
PCSK1N	0	1	1
STK24	0	1	1
DGKH	0	1	1
VAC14	0	1	1
TSC2	0	1	1
FBXO31	0	1	1
DNAJA3	0	1	1
CSK	0	1	1
PRKD2	0	1	1
TYK2	0	1	1
RASIP1	0	1	1
GSK3A	0	1	1
TSPAN12	0	1	1
EPHB6	0	1	1
RASSF4	0	1	1
ARHGAP21	0	1	1
TBC1D12	0	1	1
RPS6KB1	0	1	1
UNC119	0	1	1
TBC1D9	0	1	1
CAMKK2	0	1	1
RERGL	0	1	1
STX2	0	1	1
ADGRD1	0	1	1
TPD52L1	0	1	1
MAPK14	0	1	1
STK38	0	1	1
ICK	0	1	1
HBEGF	0	1	1
FGF1	0	1	1
RTKN	0	1	1
ASB3	0	1	1
DOK1	0	1	1
PRKD3	0	1	1
MSH6	0	1	1
RHOU	0	1	1
DOCK7	0	1	1
LEPR	0	1	1
MFN2	0	1	1
GPR89A	0	1	1
GPR68	0	1	1
PILRB	0	1	1
PIK3CA	0	1	1
GPSM2	0	1	1
ACVR2A	0	1	1
RASSF8	0	1	1
WWP1	0	1	1
ADGRE5	0	1	1
CDK2	0	1	1
RAP2C	0	1	1
CKS2	0	1	1
BMP4	0	1	1
PTGER2	0	1	1
IL1B	0	1	1
EVI2A	0	1	1
TRAF2	0	1	1
TICAM1	0	1	1
APOL3	0	1	1
RAC2	0	1	1
ACKR4	0	1	1
RAB2B	0	1	1
AFDN	0	1	1
MPP1	0	1	1
TRAF3	0	1	1
TBC1D5	0	1	1
ACAP3	0	1	1
PPFIA1	0	1	1
CSNK1G2	0	1	1
IPO8	0	1	1
IMPA1	0	1	1
CDK7	0	1	1
CHL1	0	1	1
SORT1	0	1	1
ROCK2	0	1	1
RNF138	0	1	1
ARHGAP32	0	1	1
CD36	0	1	1
RINT1	0	1	1
MDFIC	0	1	1
ITGA7	0	1	1
HTR2B	0	1	1
FLNB	0	1	1
HUS1	0	1	1
PLAA	0	1	1
THAP12	0	1	1
ITGA11	0	1	1
BCAR3	0	1	1
PLCE1	0	1	1
WDR12	0	1	1
FURIN	0	1	1
ARHGAP17	0	1	1
NKD1	0	1	1
CDH13	0	1	1
PDPK1	0	1	1
IMPA2	0	1	1
MINK1	0	1	1
RAB40B	0	1	1
ERBB2	0	1	1
AKT1	0	1	1
BCL10	0	1	1
CNIH3	0	1	1
PSEN2	0	1	1
ARL8A	0	1	1
IQSEC1	0	1	1
TIFA	0	1	1
NKD2	0	1	1
IQGAP2	0	1	1
RASA1	0	1	1
TNFRSF21	0	1	1
GNA12	0	1	1
GIGYF1	0	1	1
EBP	0	1	1
LRP12	0	1	1
PAK1	0	1	1
TAOK2	0	1	1
DOCK1	0	1	1
DLG5	0	1	1
FER	0	1	1
ASAP2	0	1	1
RABGAP1L	0	1	1
ATG10	0	1	1
RASSF3	0	1	1
PTPRD	0	1	1
PPP4R1	0	1	1
FZD7	0	1	1
DEPTOR	0	1	1
RASA2	0	1	1
BAG4	0	1	1
FZD1	0	1	1
CDC42SE2	0	1	1
AMFR	0	1	1
ITGB2	0	1	1
RALGDS	0	1	1
DVL3	0	1	1
PLCD3	0	1	1
DIRAS3	0	1	1
RBM15	0	1	1
ABRAXAS1	0	1	1
HIPK1	0	1	1
SENP2	0	1	1
F2RL1	0	1	1
CDK5	0	1	1
FZD6	0	1	1
DACT1	0	1	1
GPR176	0	1	1
BRD7	0	1	1
SGPL1	0	1	1
APBB1	0	1	1
TBC1D2B	0	1	1
CDC42EP5	0	1	1
NXN	0	1	1
CDKN2AIP	0	1	1
SEMA4C	0	1	1
ROBO1	0	1	1
ALCAM	0	1	1
CD14	0	1	1
SOCS6	0	1	1
PAQR8	0	1	1
MCC	0	1	1
PTGER4	0	1	1
RAB33B	0	1	1
THOP1	0	1	1
EIF2AK3	0	1	1
PDE3A	0	1	1
RAD9A	0	1	1
MYD88	0	1	1
RAPH1	0	1	1
CSPG4	0	1	1
AGFG1	0	1	1
RGMB	0	1	1
RALGAPA1	0	1	1
ATR	0	1	1
TRAF6	0	1	1
PPP2R2D	0	1	1
BNIP3	0	1	1
IL17RA	0	1	1
SH2B1	0	1	1
ERN1	0	1	1
HTR1F	0	1	1
PTPN11	0	1	1
CDC42EP4	0	1	1
NRIP1	0	1	1
AEN	0	1	1
RGMA	0	1	1
EXT1	0	1	1
PAQR7	0	1	1
CEP63	0	1	1
SPATA13	0	1	1
KREMEN1	0	1	1
CHEK2	0	1	1
ADAP2	0	1	1
SORCS2	0	1	1
SOCS1	0	1	1
ROR1	0	1	1
IRS2	0	1	1
RASA3	0	1	1
GNG2	0	1	1
PLCD1	0	1	1
ADA	0	1	1
SYNGAP1	0	1	1
TRIM33	0	1	1
SIPA1L1	0	1	1
ENPP1	0	1	1
GRK6	0	1	1
SPRED2	0	1	1
ITSN2	0	1	1
NUP62	0	1	1
SIPA1	0	1	1
PEG10	0	1	1
KRIT1	-0.0376795	0.969943	1
CALCOCO1	-0.104762	0.916565	1
TRIB2	-0.123485	0.901723	1
CDIP1	-0.125263	0.900315	1
RUSC1	-0.126751	0.899137	1
ARID1A	-0.148384	0.88204	1
ARHGAP15	-0.198952	0.8423	1
ARFGAP1	-0.228074	0.819589	1
AKAP8	-0.268483	0.788328	1
S1PR3	-0.271974	0.785642	1
MAML2	-0.272346	0.785356	1
TBC1D9B	-0.311748	0.755232	1
SOCS5	-0.357389	0.7208	0.96405
ZYX	-0.372034	0.709868	0.951576
ADAM10	-0.379231	0.704516	0.945472
SMC1A	-0.414278	0.678671	0.91182
GPRC5C	-0.42087	0.67385	0.90637
STK17B	-0.421127	0.673662	0.90637
PDCL	-0.422092	0.672958	0.90637
NCSTN	-0.455965	0.648415	0.876137
DDX54	-0.469845	0.638466	0.863678
RAD1	-0.572	0.567322	0.770959
H2AFX	-0.596143	0.551079	0.749746
SEL1L	-0.603614	0.5461	0.743826
APBB2	-0.661262	0.508444	0.694132
PTPN2	-0.677995	0.497775	0.68035
XPC	-0.693761	0.487832	0.66753
RAB9A	-0.694731	0.487224	0.667469
PRKAR2A	-0.697652	0.485395	0.665733
EIF2AK4	-0.704866	0.480894	0.660324
TOLLIP	-0.725116	0.468381	0.644636
IRAK4	-0.740731	0.458857	0.632262
RND3	-0.743181	0.457372	0.63095
IFT27	-0.751873	0.452127	0.624442
KMT2C	-0.752403	0.451809	0.624442
SPRED1	-0.771123	0.440634	0.610703
ARHGAP5	-0.801572	0.422801	0.588741
MAP3K7	-0.807844	0.41918	0.584387
RAF1	-0.814914	0.415121	0.57941
TBC1D10A	-0.821955	0.411102	0.574477
ARHGAP10	-0.827511	0.407948	0.570742
NBN	-0.863345	0.387948	0.544045
INPP4B	-0.877492	0.38022	0.534472
OGFR	-0.90042	0.367897	0.51838
RAB8B	-0.939939	0.347249	0.492213
DNM2	-0.967466	0.333311	0.473022
CSNK2A1	-0.969034	0.332528	0.472477
NCLN	-0.980288	0.326944	0.4651
TMED1	-1.03503	0.300657	0.429769
TRAF5	-1.0515	0.293028	0.419876
ROR2	-1.0559	0.291014	0.417495
IFNAR1	-1.05784	0.290128	0.416729
CD40	-1.05895	0.289623	0.416509
RHOT2	-1.06382	0.287409	0.413827
RABL2B	-1.08258	0.278997	0.402203
RRAGB	-1.08958	0.2759	0.398224
PAK1IP1	-1.08976	0.275817	0.398224
PIK3C3	-1.09137	0.275112	0.398056
DEF8	-1.09403	0.273944	0.39685
SLC44A2	-1.095	0.273515	0.396714
MED17	-1.11857	0.263325	0.382872
RABL6	-1.12075	0.262396	0.38199
MKLN1	-1.12359	0.261188	0.380699
DFFA	-1.12377	0.261112	0.380699
TMEM101	-1.14494	0.252234	0.369009
PSD3	-1.14525	0.252104	0.369009
PAFAH1B1	-1.15109	0.249693	0.366196
NEK6	-1.15405	0.248479	0.364867
RRBP1	-1.15907	0.246428	0.362754
TXNRD1	-1.16898	0.242412	0.357731
TMX1	-1.18268	0.236936	0.350962
RAB4B	-1.23507	0.216805	0.321948
ECM1	-1.24348	0.21369	0.317719
MUL1	-1.24989	0.21134	0.31462
RIPK2	-1.26806	0.204775	0.305231
EPHA3	-1.28639	0.198306	0.297459
TMED4	-1.31367	0.188958	0.284879
PSENEN	-1.34438	0.178827	0.270985
TBC1D7	-1.35031	0.176916	0.268431
EPS15	-1.35364	0.175851	0.267158
CCND3	-1.36162	0.173316	0.263646
PTPRA	-1.36533	0.172148	0.262205
PINK1	-1.37751	0.168355	0.256758
ARFGAP3	-1.38985	0.164573	0.251314
AKT2	-1.39032	0.164431	0.251314
MBD4	-1.39932	0.161716	0.247589
HACD3	-1.40147	0.161072	0.246922
HGS	-1.40844	0.159002	0.244064
CSNK1G3	-1.41065	0.158348	0.243375
IFNGR2	-1.41432	0.157267	0.242028
SMPD1	-1.41912	0.155863	0.240353
NAE1	-1.42735	0.153479	0.237432
OXSR1	-1.42797	0.1533	0.237432
PPP2CB	-1.4295	0.152862	0.237096
ARHGEF2	-1.44717	0.147848	0.22962
TBC1D22A	-1.44844	0.147495	0.22946
RAB35	-1.45386	0.145984	0.227626
KIDINS220	-1.45566	0.145486	0.227442
CANT1	-1.45716	0.145073	0.227096
UNC50	-1.45841	0.144728	0.226855
TLE3	-1.46215	0.143701	0.225543
BIRC2	-1.47071	0.141369	0.222178
DNM1L	-1.47956	0.138992	0.218732
BABAM2	-1.48018	0.138826	0.218732
CSNK1E	-1.48056	0.138724	0.218732
CTNND1	-1.48185	0.138381	0.218642
LZTS2	-1.49929	0.133798	0.211966
UBE2D1	-1.50632	0.131986	0.209375
JMJD6	-1.5193	0.128687	0.204415
PTPRK	-1.52043	0.128403	0.204238
SLC35B2	-1.53595	0.124551	0.199078
ARL2BP	-1.53972	0.123629	0.198242
PLEKHA1	-1.5476	0.121718	0.195441
FBXO8	-1.55066	0.120982	0.194524
TPRA1	-1.55976	0.118818	0.191563
FUT8	-1.56063	0.118612	0.191492
CDC42BPA	-1.57014	0.116382	0.188405
CDC42	-1.58121	0.113829	0.184525
PKN2	-1.5855	0.112852	0.183443
RBFOX2	-1.59122	0.11156	0.181591
ARHGEF1	-1.605	0.108493	0.176843
TBC1D23	-1.60852	0.107721	0.175825
PHIP	-1.60891	0.107636	0.175825
GNL1	-1.60957	0.107492	0.175825
CAMK1	-1.62308	0.104573	0.171633
GSK3B	-1.62689	0.10376	0.170535
RGS5	-1.62991	0.103121	0.169721
TLE1	-1.64331	0.100319	0.165339
BMPR2	-1.64782	0.0993886	0.164033
PKN1	-1.648	0.0993533	0.164033
IFNAR2	-1.65541	0.0978408	0.161929
CASP1	-1.65942	0.097031	0.160814
HDAC3	-1.66177	0.0965588	0.160255
AKT3	-1.67416	0.0941001	0.156394
TAOK1	-1.68727	0.0915523	0.152373
PLRG1	-1.70068	0.0890037	0.148758
BAG1	-1.70154	0.088841	0.148719
GOLPH3	-1.7018	0.0887933	0.148719
YARS	-1.70372	0.088433	0.148643
ACVRL1	-1.70387	0.088406	0.148643
AES	-1.707	0.0878229	0.148037
TNIP2	-1.70702	0.0878187	0.148037
IQGAP1	-1.71169	0.0869532	0.146989
CRK	-1.7224	0.0849976	0.143889
CCM2	-1.72246	0.0849864	0.143889
RASAL2	-1.72366	0.0847692	0.143889
ARAF	-1.72826	0.0839413	0.142712
USP9X	-1.7306	0.0835233	0.142206
CNIH1	-1.74724	0.0805964	0.138015
DEDD2	-1.74868	0.0803468	0.137787
RICTOR	-1.76318	0.0778695	0.134121
CCND1	-1.76633	0.0773397	0.133403
RGS4	-1.77628	0.075687	0.130742
DERL1	-1.78299	0.0745872	0.12903
EXT2	-1.79288	0.0729918	0.126455
GRN	-1.79429	0.0727674	0.126251
SP110	-1.79766	0.0722313	0.125505
AKT1S1	-1.79862	0.0720787	0.125423
CYTH2	-1.80054	0.0717752	0.125079
DIXDC1	-1.81074	0.0701808	0.12248
ARFIP2	-1.81089	0.0701583	0.12248
TLK1	-1.81252	0.069906	0.122361
STMN3	-1.81772	0.0691074	0.121142
PAK2	-1.8198	0.0687897	0.120764
HRAS	-1.82883	0.0674251	0.118544
PRMT2	-1.84313	0.0653105	0.114997
RAB10	-1.84452	0.0651073	0.11481
KAT5	-1.84586	0.064913	0.114638
ARHGEF7	-1.84591	0.0649046	0.114638
EEF1E1	-1.84922	0.0644266	0.11429
CARD19	-1.85168	0.0640715	0.11383
APH1A	-1.85302	0.0638793	0.113659
MAP4K5	-1.85628	0.063413	0.112999
DAXX	-1.85728	0.0632715	0.112917
RHOG	-1.86375	0.0623573	0.111453
AKAP9	-1.86614	0.062022	0.111021
DDAH1	-1.87358	0.0609881	0.109501
RAB14	-1.89081	0.0586502	0.105464
RNF14	-1.90528	0.0567431	0.102345
SNX27	-1.9072	0.0564948	0.102052
DRG2	-1.91043	0.0560775	0.101453
STUB1	-1.91283	0.0557692	0.10105
TIMM50	-1.91326	0.0557145	0.10105
ITGAE	-1.91386	0.0556376	0.10105
PRDX4	-1.92133	0.0546907	0.0995522
FNTA	-1.93789	0.0526363	0.0961078
TBC1D17	-1.93833	0.0525829	0.0961078
CASP7	-1.9403	0.0523434	0.0958684
SHC1	-1.94214	0.05212	0.0956072
TBL3	-1.94391	0.0519064	0.0953629
WASF2	-1.95142	0.0510075	0.093857
RAB18	-1.95865	0.0501536	0.0924292
STK17A	-1.96007	0.049988	0.0922676
ASB8	-1.96721	0.0491585	0.0910201
ARHGEF25	-1.96799	0.0490687	0.0909959
WNK1	-1.96802	0.0490658	0.0909959
AKAP13	-1.97406	0.0483746	0.0899905
ASB13	-1.97738	0.0479983	0.0894309
IL17RC	-1.9883	0.046779	0.0872962
ARHGEF9	-1.98958	0.046637	0.0871685
GNB5	-1.99273	0.0462909	0.0866583
ARF3	-1.99785	0.045733	0.0858853
FEZ2	-2.00041	0.0454565	0.0855015
RIT1	-2.00115	0.0453763	0.0854863
TNFSF12	-2.00132	0.0453578	0.0854863
ANG	-2.00399	0.0450708	0.0851816
NDRG2	-2.0067	0.0447817	0.0847705
GNB2	-2.00682	0.0447691	0.0847705
TRIM38	-2.0076	0.0446853	0.0847705
MED13	-2.01323	0.0440901	0.0838632
ING2	-2.01468	0.0439385	0.0837091
RB1CC1	-2.0162	0.0437789	0.0835394
HBS1L	-2.02243	0.0431319	0.0824375
TBC1D20	-2.02503	0.0428645	0.0820588
ARL8B	-2.02603	0.042762	0.0819952
ARFGAP2	-2.03114	0.0422404	0.081258
NEDD9	-2.03171	0.0421835	0.081258
HMGXB4	-2.0513	0.0402375	0.0777838
FADD	-2.05849	0.0395432	0.0765665
ITGB3BP	-2.06521	0.0389036	0.075699
IL13RA1	-2.06757	0.0386807	0.0753893
RAP1A	-2.06892	0.0385534	0.075265
RAB4A	-2.07274	0.0381965	0.074788
STAM	-2.07766	0.0377411	0.074045
VOPP1	-2.07906	0.0376121	0.0739143
ARHGAP18	-2.0822	0.0373243	0.0734705
TNS2	-2.08584	0.0369929	0.0729393
XPA	-2.08698	0.0368903	0.0728583
ADGRA2	-2.08781	0.0368154	0.0728319
SMAP1	-2.09241	0.0364015	0.0721335
NMI	-2.10783	0.0350454	0.0695625
PKD2	-2.11868	0.0341179	0.0678352
NDFIP1	-2.11981	0.0340218	0.0677576
ARHGEF12	-2.12089	0.0339308	0.0676902
ATP2C1	-2.13087	0.0330996	0.0661435
ATM	-2.13296	0.0329282	0.0659121
ARHGAP24	-2.14062	0.0323045	0.0647731
MAPK1	-2.14334	0.0320861	0.0644441
SRI	-2.14528	0.0319303	0.0642401
MBIP	-2.15435	0.0312127	0.0630103
TDP2	-2.1558	0.0310994	0.0628886
CBY1	-2.15638	0.0310541	0.0628886
DUSP22	-2.16034	0.0307466	0.0623883
PDCD6	-2.16213	0.0306079	0.0622133
TRAF7	-2.16261	0.0305716	0.0622133
ADGRF5	-2.16345	0.0305067	0.0622133
AIDA	-2.16903	0.0300804	0.0614573
RABIF	-2.17641	0.0295246	0.0605305
LASP1	-2.18065	0.0292093	0.059988
INSIG2	-2.18147	0.0291489	0.0599678
SERGEF	-2.18566	0.0288404	0.0594363
PYCARD	-2.18837	0.0286424	0.059131
SPG21	-2.18875	0.0286152	0.059131
RAB27A	-2.19017	0.0285119	0.0590675
CDC37	-2.19382	0.0282481	0.0586235
PSEN1	-2.19582	0.0281048	0.0584283
PCNA	-2.19801	0.0279484	0.0582054
PIN1	-2.19835	0.0279243	0.0582054
CNTLN	-2.19978	0.0278228	0.0581481
GOLT1B	-2.20094	0.0277406	0.0580788
M6PR	-2.20575	0.0274017	0.0575728
GRB2	-2.20966	0.027129	0.0571011
LAMTOR3	-2.21099	0.0270364	0.0570074
PDE5A	-2.21796	0.0265573	0.056197
PTHLH	-2.22307	0.026211	0.0555636
USP8	-2.22475	0.0260981	0.0554487
AIP	-2.22808	0.0258753	0.0551478
TXNDC12	-2.23081	0.0256937	0.0548595
RHOT1	-2.23095	0.0256846	0.0548595
CXCL16	-2.23191	0.0256208	0.0548595
RAB34	-2.23933	0.0251345	0.0540552
MAP3K20	-2.23941	0.0251296	0.0540552
HOMER3	-2.25175	0.0243384	0.0526295
DAP3	-2.25317	0.0242484	0.0525308
DYRK2	-2.2536	0.0242211	0.0525308
FKBP8	-2.25604	0.024068	0.0524115
ACVR1	-2.25909	0.0238778	0.0521089
RAB8A	-2.25974	0.0238372	0.0521089
RALB	-2.26357	0.0236003	0.0517896
EIF4EBP2	-2.27533	0.0228864	0.0503161
MAPK8	-2.28362	0.0223938	0.0494165
GAPVD1	-2.29267	0.0218668	0.0483436
PPP5C	-2.30036	0.0214276	0.0474611
SKAP2	-2.30324	0.0212655	0.0471902
RANBP1	-2.30683	0.0210641	0.0469191
BCKDK	-2.30731	0.0210375	0.0469191
TRIAP1	-2.31793	0.0204532	0.0457303
TRADD	-2.31826	0.0204353	0.0457303
DTX3	-2.31968	0.0203581	0.0456902
AGPAT2	-2.33625	0.0194782	0.0440489
IGF1R	-2.33677	0.0194513	0.0440489
RAB5B	-2.33928	0.0193211	0.0438925
ABI1	-2.35043	0.0187516	0.0428144
NDN	-2.35355	0.0185953	0.0425395
THRAP3	-2.3569	0.018428	0.0422382
GNB4	-2.36639	0.0179624	0.0413309
TGFBR1	-2.3691	0.0178317	0.04111
PLP2	-2.37013	0.017782	0.0410754
RALA	-2.3763	0.0174875	0.0404739
TRIM13	-2.37691	0.0174583	0.0404739
RTN2	-2.38635	0.0170163	0.039538
CTNNBIP1	-2.38693	0.0169897	0.039538
FIBP	-2.39056	0.0168228	0.0392421
KRAS	-2.39065	0.0168184	0.0392421
P2RX4	-2.3915	0.0167799	0.0392421
IRS1	-2.40596	0.0161299	0.038011
VAPB	-2.40931	0.0159826	0.0378788
GMFB	-2.40968	0.0159667	0.0378788
CDKN2B	-2.41385	0.015785	0.0375607
SNX17	-2.42219	0.0154273	0.0367833
PRKAG1	-2.42517	0.0153014	0.0365567
MAPK3	-2.42622	0.0152572	0.0365249
ARL5A	-2.43238	0.0149998	0.0359813
GLRX2	-2.43923	0.0147186	0.0353784
LTBR	-2.44377	0.0145346	0.0350071
EVL	-2.44781	0.0143726	0.0346874
DERL2	-2.44854	0.0143437	0.0346874
MYO6	-2.44888	0.0143299	0.0346874
MED4	-2.45541	0.0140726	0.0341721
ING4	-2.45622	0.0140409	0.0341651
EPS8	-2.4567	0.014022	0.0341651
PPP4C	-2.45924	0.0139232	0.0340185
EIF4EBP1	-2.46519	0.0136941	0.033528
SRPK2	-2.46618	0.0136564	0.033528
PPP2R1A	-2.47037	0.0134973	0.0332521
TRIP6	-2.47594	0.0132885	0.0328059
CDK4	-2.47628	0.013276	0.0328059
ITGBL1	-2.4808	0.013109	0.0324982
ACTL6A	-2.48218	0.0130581	0.0324398
SHISA5	-2.48248	0.013047	0.0324398
LY96	-2.48997	0.0127753	0.0318711
MLST8	-2.4916	0.012717	0.0317924
PRDX2	-2.4925	0.0126848	0.0317791
RAB11B	-2.4929	0.0126705	0.0317791
FHL2	-2.49557	0.0125755	0.0316391
ENPP2	-2.50262	0.0123278	0.0312146
RASL12	-2.50606	0.0122086	0.0310456
CLN3	-2.51158	0.0120193	0.0306959
TFPT	-2.51273	0.0119802	0.030662
ARFRP1	-2.51274	0.0119796	0.030662
EIF2AK2	-2.5154	0.0118897	0.030629
SCG5	-2.5179	0.0118056	0.0304786
RAB32	-2.51889	0.0117724	0.0304591
EVI5	-2.52258	0.0116497	0.0302077
RAB28	-2.52481	0.0115761	0.0300826
ADIPOR1	-2.52792	0.011474	0.0298828
PLK2	-2.5298	0.0114128	0.029797
TFG	-2.53066	0.0113849	0.029797
TSPAN6	-2.53509	0.011242	0.0296039
PDAP1	-2.53727	0.0111722	0.0294856
STK25	-2.54466	0.0109383	0.0289974
SPOCK1	-2.5456	0.0109091	0.028985
SGSM3	-2.54802	0.0108336	0.028849
PAG1	-2.54849	0.010819	0.028849
CHST11	-2.54963	0.0107837	0.0288458
EGLN2	-2.56027	0.0104591	0.0280409
ERBIN	-2.56069	0.0104465	0.0280409
WSB2	-2.56375	0.0103548	0.0278875
HERPUD1	-2.56458	0.0103301	0.0278843
BCAR1	-2.5671	0.0102552	0.0277452
DAPK3	-2.56828	0.0102206	0.0277148
RAB1B	-2.57373	0.0100609	0.0273444
GNG11	-2.57607	0.00999291	0.0272221
COPS2	-2.58194	0.00982476	0.0268257
TSPO	-2.58311	0.00979147	0.0267965
CAMLG	-2.58531	0.00972912	0.0266875
PTK2	-2.58925	0.0096186	0.0264664
BAX	-2.58936	0.00961543	0.0264664
CSNK2B	-2.59311	0.00951121	0.0263953
SNX6	-2.5945	0.00947282	0.0263504
PDE1A	-2.59642	0.00942002	0.0262652
PLXNB2	-2.60543	0.00917602	0.0257059
RAB5A	-2.61228	0.00899402	0.0252557
ROCK1	-2.61632	0.00888843	0.0250185
EIF2A	-2.61764	0.00885392	0.0249807
ERO1A	-2.61837	0.00883518	0.0249807
PPP1R12A	-2.61969	0.00880101	0.0249502
DBNL	-2.62085	0.0087711	0.0249251
DAP	-2.62299	0.00871607	0.0248282
FASTK	-2.62366	0.00869899	0.0248282
CRYAB	-2.6252	0.00865986	0.0247873
PTK7	-2.62866	0.0085722	0.0246246
MRAS	-2.63209	0.00848613	0.0244673
GIPC1	-2.63246	0.00847699	0.0244673
DUSP4	-2.63385	0.0084424	0.0244603
SMC3	-2.64268	0.00822537	0.0238899
GNAI1	-2.6531	0.0079756	0.0232213
TNFRSF14	-2.65571	0.00791421	0.0230994
EEF1D	-2.65636	0.00789882	0.0230994
PPP1R2	-2.66386	0.00772494	0.0227148
SQSTM1	-2.66547	0.00768819	0.022663
OSTF1	-2.66888	0.00761051	0.0224899
ICMT	-2.67871	0.00739053	0.0218944
GPS1	-2.68382	0.00727872	0.0216716
RPS27A	-2.68488	0.00725561	0.0216572
NKIRAS2	-2.69551	0.00702801	0.021084
ITGA2	-2.69577	0.00702253	0.021084
DEK	-2.70356	0.00686012	0.0206851
CNIH4	-2.70392	0.00685272	0.0206851
GPSM3	-2.71417	0.00664429	0.0201505
TULP3	-2.7148	0.00663156	0.0201505
ASAP1	-2.71714	0.0065849	0.0201111
ITSN1	-2.73352	0.00626605	0.0193366
BABAM1	-2.7403	0.00613823	0.0190414
SPSB3	-2.74129	0.00611988	0.0190343
RPS6	-2.74747	0.00600577	0.0187285
DDIT4	-2.7487	0.00598323	0.0187075
BAD	-2.75786	0.0058182	0.018288
PLXNC1	-2.75889	0.00579974	0.0182784
RAB6A	-2.75925	0.00579342	0.0182784
MAP3K13	-2.76671	0.00566258	0.0179416
BCL2L1	-2.76934	0.005617	0.0178449
ANP32A	-2.77627	0.00549865	0.0175159
ARL3	-2.77673	0.00549096	0.0175159
ITGAV	-2.77742	0.00547916	0.0175159
PAWR	-2.78192	0.00540385	0.0173538
STK3	-2.7823	0.00539749	0.0173538
FARP1	-2.79662	0.00516408	0.0166742
CHMP5	-2.79919	0.00512313	0.0165872
SPHK1	-2.80978	0.00495749	0.0161391
YWHAB	-2.81649	0.0048552	0.0158496
PPP2R5E	-2.81883	0.00481997	0.0157781
KHDRBS1	-2.82345	0.00475101	0.0155954
LRRFIP2	-2.82717	0.00469608	0.0154579
CHN1	-2.82771	0.00468827	0.0154579
PRKCSH	-2.83708	0.00455279	0.01507
CALM3	-2.84335	0.00446423	0.0148183
MGST2	-2.8466	0.00441894	0.0147506
DPF2	-2.84711	0.00441187	0.0147506
DVL2	-2.8592	0.00424708	0.0142572
CABIN1	-2.86137	0.00421811	0.0142002
UBA52	-2.86485	0.00417213	0.0140854
PIK3R1	-2.86843	0.00412518	0.0139667
PPT1	-2.86888	0.00411933	0.0139667
CORO1C	-2.87215	0.00407689	0.0138825
G3BP2	-2.87742	0.00400943	0.0137317
GNAI2	-2.87788	0.00400355	0.0137317
BSG	-2.87863	0.003994	0.0137317
UNC5B	-2.87947	0.0039834	0.0137317
AGT	-2.88007	0.00397593	0.0137317
HIST1H4C	-2.88009	0.00397557	0.0137317
PPM1A	-2.8928	0.00381823	0.0133163
STK38L	-2.8934	0.00381098	0.0133163
RALBP1	-2.89919	0.00374134	0.0132739
TAOK3	-2.90438	0.00367982	0.0130949
WISP1	-2.9121	0.00359003	0.0128138
TXNDC17	-2.91803	0.0035225	0.012649
HSP90AB1	-2.91816	0.00352099	0.012649
RPS3	-2.92227	0.0034749	0.0125925
SPARCL1	-2.93025	0.00338691	0.0123492
GUCY1A1	-2.93586	0.00332619	0.0122029
KIFAP3	-2.9385	0.0032981	0.0121387
RGS16	-2.9424	0.00325678	0.0120603
YWHAQ	-2.95093	0.00316823	0.0117691
DDR2	-2.95811	0.0030953	0.0115708
ITGB5	-2.95955	0.00308093	0.0115708
SOD1	-2.97134	0.00296499	0.0113339
RAB23	-2.97288	0.00295021	0.0113139
ANXA4	-2.99435	0.00275032	0.0107208
PRKG1	-2.99494	0.00274498	0.0107208
ITGB1BP1	-3.02206	0.00251061	0.00991693
CDC42EP3	-3.02566	0.00248093	0.00985386
SYDE1	-3.03032	0.00244297	0.00978012
MDFI	-3.03048	0.00244169	0.00978012
KMT2E	-3.03083	0.00243884	0.00978012
GDI1	-3.03188	0.00243038	0.00978012
ARL2	-3.03768	0.00238404	0.0097082
ARF5	-3.03788	0.0023825	0.0097082
NET1	-3.0409	0.0023587	0.00967147
MACF1	-3.04125	0.00235595	0.00967147
SHARPIN	-3.04471	0.00232907	0.00961656
ARL1	-3.04723	0.00230957	0.00956938
PKIG	-3.04854	0.00229959	0.00956144
NPM1	-3.05189	0.00227407	0.00952217
RHOD	-3.06124	0.00220424	0.00932866
ARHGEF17	-3.0689	0.00214846	0.00915801
LGALS9	-3.07102	0.00213328	0.00912614
GUCY1B1	-3.07363	0.0021147	0.00907941
RPS6KB2	-3.07553	0.00210129	0.00907129
NCK1	-3.0784	0.00208116	0.00906684
CLIC1	-3.08109	0.00206243	0.00901837
JAG1	-3.08266	0.00205157	0.00900413
NSMCE1	-3.08723	0.00202029	0.00889978
ACAP2	-3.09506	0.00196775	0.00876611
LPAR6	-3.0956	0.00196416	0.00876611
PTPRE	-3.09918	0.00194058	0.00871057
PMEPA1	-3.10713	0.00188911	0.00851175
DCBLD2	-3.10941	0.00187464	0.00851131
TGFB3	-3.11363	0.00184804	0.00845531
CALM2	-3.11608	0.00183274	0.00842734
SORBS3	-3.11944	0.00181196	0.00838737
BST2	-3.11946	0.00181183	0.00838737
PTGIR	-3.12496	0.00177826	0.00836207
GDI2	-3.12803	0.00175981	0.00834148
BBC3	-3.12927	0.00175244	0.0083399
HSP90AA1	-3.12929	0.00175229	0.0083399
RAB2A	-3.1333	0.00172852	0.00833581
CEP57	-3.13346	0.00172757	0.00833581
IGBP1	-3.13609	0.00171215	0.00833581
DERL3	-3.13959	0.00169182	0.00828433
BEX3	-3.14162	0.00168019	0.00828433
RGS3	-3.14281	0.00167335	0.00828433
MAGED1	-3.15106	0.00162678	0.00813389
AGPAT1	-3.15595	0.00159974	0.00806679
ARHGDIB	-3.16282	0.00156246	0.00798068
SH3BGRL	-3.16688	0.00154083	0.00790428
RIN2	-3.17649	0.00149071	0.00771395
TAX1BP3	-3.17795	0.00148321	0.00770878
YWHAH	-3.18494	0.00144786	0.00755823
RAB13	-3.18785	0.00143334	0.00753459
RAP2B	-3.18801	0.00143255	0.00753459
MYO1E	-3.18876	0.00142882	0.00753459
RAB5C	-3.18891	0.00142812	0.00753459
PTEN	-3.19685	0.00138937	0.00748363
NDUFS4	-3.19853	0.00138129	0.00747411
GPX1	-3.20157	0.00136679	0.0074638
IFT52	-3.20213	0.00136415	0.0074638
GLRB	-3.21311	0.00131305	0.00730497
HSPE1	-3.21882	0.00128721	0.00724264
GULP1	-3.22815	0.00124594	0.00709829
CD59	-3.2319	0.0012297	0.0070396
HIP1	-3.23204	0.00122908	0.0070396
MX1	-3.24411	0.00117816	0.00681036
MAPRE2	-3.25663	0.00112741	0.00661379
RRAS	-3.25744	0.00112421	0.00661379
GGCT	-3.25755	0.00112379	0.00661379
MGST3	-3.27071	0.00107279	0.00648599
TGFB1	-3.27609	0.00105256	0.00642928
COMMD7	-3.27721	0.0010484	0.00642928
JAK1	-3.27801	0.00104542	0.00642928
IFITM1	-3.27992	0.00103836	0.00642928
HINT1	-3.28905	0.00100525	0.00638092
MYH9	-3.2926	0.000992657	0.00635837
PDGFRB	-3.29502	0.000984159	0.0063382
CTGF	-3.298	0.000973747	0.00630541
STMN1	-3.30065	0.000964617	0.00630541
ILK	-3.32442	0.000886034	0.00610436
UACA	-3.32567	0.000882068	0.00610436
OPTN	-3.3409	0.000835059	0.00583027
PDGFC	-3.34151	0.000833243	0.00583027
FLNA	-3.34226	0.000830996	0.00583027
GNG5	-3.34496	0.000822935	0.00583027
STAMBP	-3.35598	0.000790854	0.00577157
ARHGDIA	-3.35962	0.000780506	0.00574471
RAMP1	-3.36383	0.00076868	0.00574471
PTGES3	-3.39561	0.000684755	0.00533838
CAV1	-3.40513	0.000661328	0.00522449
TGM2	-3.40694	0.000656948	0.00522449
RSU1	-3.41712	0.000632874	0.00521239
CDC42EP1	-3.42423	0.000616545	0.00514511
GNAS	-3.43371	0.00059538	0.00502448
DUSP10	-3.43923	0.000583368	0.00500936
TGFB1I1	-3.4465	0.000567905	0.00494829
RHOA	-3.44965	0.000561315	0.00494829
AIMP1	-3.45732	0.000545571	0.00488764
F2R	-3.46779	0.000524765	0.00474692
PRDX1	-3.47294	0.000514796	0.00472049
PEBP1	-3.51053	0.000447208	0.00434789
ENG	-3.51265	0.000443668	0.00434789
RAB11A	-3.51906	0.000433072	0.00434789
KIAA1324L	-3.53097	0.000414034	0.00431837
RCAN2	-3.53546	0.000407068	0.00431837
CAV2	-3.55689	0.000375278	0.00415612
ARF1	-3.57178	0.000354564	0.0040792
UBB	-3.58838	0.000332745	0.003898
ARHGAP1	-3.61303	0.00030264	0.0036972
NDUFA13	-3.61367	0.000301895	0.0036972
THY1	-3.63183	0.000281414	0.00363597
PMAIP1	-3.64006	0.000272573	0.00363597
PHLDA3	-3.67882	0.000234312	0.00334696
ITGB1	-3.71034	0.00020698	0.00312928
PARK7	-3.71245	0.000205264	0.00312928
MIF	-3.71914	0.000199903	0.00312928
RAB31	-3.72613	0.00019444	0.00311367
CAP1	-3.76332	0.000167672	0.00275443
PDIA3	-3.77455	0.000160299	0.00271363
ANTXR1	-3.78219	0.000155456	0.00270905
ARL4C	-3.80953	0.00013923	0.00256726
ITGA1	-3.81423	0.000136608	0.00256726
CFL1	-3.82593	0.000130278	0.00256726
CALR	-3.84334	0.00012137	0.00250453
RPS27L	-3.87558	0.000106369	0.00238904
S100A11	-3.96198	7.43301e-05	0.00200272
CALM1	-3.96764	7.25884e-05	0.00200272
TNFSF13B	-3.98631	6.71096e-05	0.00200272
HSPB1	-3.99828	6.38037e-05	0.00200272
PPIC	-4.0305	5.56583e-05	0.00193985
WNT2	-4.1217	3.76082e-05	0.0016601
RAC1	-4.1371	3.51727e-05	0.0016601
LGALS1	-4.23651	2.27017e-05	0.00155413
GREM1	-4.24409	2.19481e-05	0.00155413
ARF4	-4.30587	1.66331e-05	0.00155413
NPR3	-4.3195	1.56381e-05	0.00155413
RHOC	-4.61887	3.8583e-06	0.0013596
EDNRA	-4.66059	3.15306e-06	0.0013596
IGFBP3	-4.92983	8.23007e-07	0.000975264
