# Supplementary material for: Cross-Species Single-Cell Analysis of Pancreatic Ductal Adenocarcinoma Reveals Antigen-Presenting Cancer-Associated Fibroblasts
Source: Oxford University Press journal article supplement (doi:10.1158/2159-8290.cd-19-0094), 2019-06-13
Supplement: 21598290cd190094-sup-215864_2_supp_5552230_ps91bp.xlsx [file 21598290cd190094-sup-215864_2_supp_5552230_ps91bp.xlsx]

## Sheet: mrTFs_pvalue
Protein	Activity	P-Value	FDR
ZC3HAV1	4.87745	1.07464e-06	0.000311647
CSRNP1	4.59424	4.34327e-06	0.000430291
EBF2	4.58912	4.45129e-06	0.000430291
XBP1	4.49828	6.85051e-06	0.000504368
CREB5	4.49501	6.9568e-06	0.000504368
HIC1	4.37497	1.21448e-05	0.000749647
TSC22D2	4.35325	1.34135e-05	0.000749647
ZBTB21	4.34048	1.42174e-05	0.000749647
NFIL3	4.25344	2.10509e-05	0.00101746
KLF9	4.14142	3.45155e-05	0.00142993
ZFP36L1	4.05412	5.03229e-05	0.00179209
CEBPB	4.04409	5.25267e-05	0.00179209
KLF6	4.00645	6.16394e-05	0.00198616
ZNF331	3.92019	8.84809e-05	0.00256595
HMGA1	3.88921	0.000100572	0.00265144
NFATC1	3.87285	0.00010757	0.00271263
NR4A2	3.81143	0.000138164	0.00321697
ZFP36L2	3.80804	0.000140073	0.00321697
JUN	3.78428	0.000154156	0.00321697
STRN3	3.78331	0.000154759	0.00321697
ELMSAN1	3.76361	0.000167476	0.00321697
EBF1	3.76117	0.000169118	0.00321697
ZFP36	3.75488	0.000173425	0.00321697
ZFAND5	3.74907	0.000177488	0.00321697
IFI16	3.73064	0.000190994	0.00324117
NOLC1	3.70238	0.000213586	0.00333846
FOSL2	3.69491	0.000219966	0.00333846
ZNF385A	3.68969	0.000224523	0.00333846
EGR3	3.68033	0.000232935	0.00333846
FOSL1	3.677	0.000235994	0.00333846
TAF1D	3.65466	0.00025752	0.00350603
NFIB	3.64637	0.000265975	0.00350603
FOXF1	3.63072	0.000282629	0.00356358
JUNB	3.60713	0.000309607	0.00358478
NFE2L2	3.60394	0.000313429	0.00358478
MORC4	3.59567	0.000323553	0.00358478
PLAGL1	3.58435	0.000337913	0.0036186
IRF1	3.56418	0.00036499	0.00377624
NR4A3	3.55775	0.000374044	0.00377624
ZSWIM6	3.5542	0.000379135	0.00377624
KLF4	3.55075	0.000384135	0.00377624
GAS7	3.51753	0.000435576	0.00414154
HIF1A	3.51218	0.000444452	0.0041545
YBX3	3.50458	0.000457332	0.0041545
CEBPD	3.50394	0.000458428	0.0041545
RCAN1	3.47265	0.000515352	0.00459852
CTNNB1	3.46148	0.000537219	0.00471328
AHR	3.45414	0.000552046	0.00471328
RFX2	3.45388	0.000552592	0.00471328
NR4A1	3.44832	0.000564079	0.00474154
JUND	3.44265	0.000576036	0.00477287
TCF25	3.42427	0.000616443	0.00478239
ENO1	3.4228	0.000619797	0.00478239
ZC3H12A	3.42048	0.000625098	0.00478239
NFATC2	3.41768	0.000631568	0.00478239
ZNF655	3.41475	0.000638417	0.00478239
MYC	3.40811	0.000654148	0.00478239
MAFF	3.40811	0.000654155	0.00478239
HNRNPAB	3.40533	0.000660844	0.00478239
KLF16	3.37969	0.000725685	0.0050156
ZSCAN18	3.37942	0.000726398	0.0050156
REL	3.36375	0.000768899	0.00524661
CREM	3.33679	0.000847526	0.00557129
BAZ1A	3.33408	0.000855819	0.00557129
NFIA	3.33322	0.000858478	0.00557129
TSC22D3	3.32716	0.000877372	0.00559204
KLF2	3.29736	0.000975971	0.0060867
BCL3	3.28481	0.00102052	0.00628477
WT1	3.28237	0.0010294	0.00628477
EGR1	3.26273	0.00110343	0.00659785
ZDHHC9	3.25791	0.00112234	0.00664242
ILF3	3.24366	0.00118005	0.00690925
STAT3	3.21624	0.00129881	0.00745853
FOSB	3.19174	0.00141417	0.00774482
ERF	3.19149	0.00141543	0.00774482
RELB	3.12627	0.00177039	0.00927693
GLIS3	3.11923	0.00181325	0.00930695
ATF3	3.08726	0.00202009	0.0102777
RARA	3.06829	0.0021529	0.010692
FOS	3.03969	0.00236819	0.0114462
FOXP1	3.02307	0.00250225	0.0118827
TGIF1	3.00799	0.00262983	0.0121009
KLF10	3.0057	0.00264967	0.0121009
KLF3	2.98732	0.00281438	0.0123839
TSHZ2	2.94438	0.003236	0.0131776
APP	2.92099	0.00348926	0.013957
NFATC4	2.91101	0.00360263	0.0143118
SREBF1	2.90359	0.00368911	0.0145557
TFAM	2.87076	0.00409486	0.0157184
YY1	2.81892	0.00481852	0.0176398
ATF4	2.81839	0.00482656	0.0176398
PRDM2	2.81633	0.00485751	0.0176398
ZFR	2.79081	0.00525764	0.0184814
ZNF638	2.78073	0.00542369	0.0188368
ZCCHC10	2.76561	0.00568166	0.0193845
ETV3	2.74627	0.00602764	0.0203258
ZNF593	2.68888	0.00716931	0.0229525
TRIM22	2.66855	0.00761805	0.0238091
MECP2	2.48027	0.0131282	0.0360869
HBP1	2.44687	0.0144105	0.0389676
FOXO3	2.4373	0.0147974	0.0395506
NFYB	2.42112	0.0154729	0.0411664
NFKB1	2.40854	0.0160164	0.0422476
TAF13	2.38469	0.0170937	0.0446591
RUNX1	2.37888	0.0173654	0.0451656
ZFC3H1	2.36156	0.0181981	0.0470145
CEBPZ	2.36074	0.0182384	0.0470145
ASH1L	2.32256	0.0202026	0.0494644
TCF7L2	2.27127	0.0231303	0.0552082
ZMYND11	2.25367	0.0242171	0.0575653
TSHZ3	2.20259	0.0276239	0.0636179
ZBTB1	2.11076	0.0347926	0.076729
PHF20	2.05386	0.0399894	0.0868683
ELF1	2.03657	0.0416931	0.089563
ZBTB7A	2.01087	0.0443396	0.0948965
ZMYM2	1.96932	0.0489169	0.102057
RC3H1	1.92735	0.0539365	0.110541
TFE3	1.92408	0.0543449	0.110875
NFIC	1.89763	0.0577448	0.116147
ZNF800	1.8874	0.0591064	0.118213
ZNF131	1.807	0.0707629	0.139016
ZC3H15	1.80281	0.0714182	0.13947
TRIM28	1.76749	0.0771458	0.147193
NOTCH2	1.75751	0.0788308	0.149908
CREBBP	1.74723	0.0805975	0.151774
NR2F1	1.71045	0.0871833	0.162072
SCML1	1.69344	0.090372	0.16546
ELK3	1.62443	0.104284	0.187841
EPAS1	1.62091	0.105037	0.188611
ADNP	1.59112	0.111583	0.199747
NFAT5	1.43993	0.149888	0.257968
PHF1	1.35914	0.174101	0.295259
ZNFX1	1.21442	0.224587	0.371113
CBFB	1.16365	0.244567	0.399574
STAT6	1.07752	0.281248	0.454384
NFIX	1.05785	0.290125	0.463561
RLF	0.989297	0.322518	0.511094
BAZ2B	0.958315	0.337904	0.531123
ZC3H7A	0.916074	0.359628	0.563328
NFE2L1	0.913536	0.360961	0.563328
TARDBP	0.911244	0.362167	0.563328
CIZ1	0.911033	0.362278	0.563328
PBX1	0.870272	0.384152	0.592575
FUBP1	0.82843	0.407427	0.625153
ATF1	0.659761	0.509407	0.769417
ZC3H11A	0.65748	0.510872	0.769626
ELK4	0.648646	0.516567	0.776189
ZNF451	0.532111	0.594649	0.886623
ZNF644	0.512366	0.608395	0.904792
DMAP1	0.418815	0.675352	0.996702
ZFAND2B	0.38025	0.70376	1
TCF7	0.379908	0.704014	1
ZC3H14	0.31914	0.74962	1
AEBP2	0.308368	0.757802	1
RBPJ	0.295687	0.767469	1
ETS2	0.270053	0.78712	1
TOP2B	0.264637	0.791289	1
UBN1	0.213525	0.830918	1
CTBP1	0.147939	0.882391	1
EWSR1	0.0128553	0.989743	1
KDM1A	0	1	1
GCFC2	0	1	1
ZFX	0	1	1
ZNF263	0	1	1
PHTF2	0	1	1
JARID2	0	1	1
HIVEP2	0	1	1
ZRANB1	0	1	1
NR1H3	0	1	1
ZCCHC8	0	1	1
ZFYVE16	0	1	1
RC3H2	0	1	1
MTA3	0	1	1
FLYWCH1	0	1	1
MXD1	0	1	1
LZTS1	0	1	1
TAF2	0	1	1
ZNF76	0	1	1
ZBTB11	0	1	1
MNT	0	1	1
HLTF	0	1	1
ZNF37A	0	1	1
BAZ2A	0	1	1
RARB	0	1	1
THOC1	0	1	1
CIC	0	1	1
ZCCHC6	0	1	1
RRN3	0	1	1
CERS4	0	1	1
ZFHX4	0	1	1
BTAF1	0	1	1
HIVEP1	0	1	1
LZTR1	0	1	1
TFIP11	0	1	1
ZC3H7B	0	1	1
ZMYND8	0	1	1
ZNF516	0	1	1
SMAD7	0	1	1
TBL1X	0	1	1
CTCF	0	1	1
ZNF821	0	1	1
GABPB1	0	1	1
TRPS1	0	1	1
MIER2	0	1	1
USF2	0	1	1
ZNF574	0	1	1
HOXA3	0	1	1
HOXA5	0	1	1
GLI3	0	1	1
BMPR1A	0	1	1
ZMIZ1	0	1	1
SUPT6H	0	1	1
FBXW7	0	1	1
ZBTB16	0	1	1
RNF141	0	1	1
CSRNP2	0	1	1
CREBL2	0	1	1
TFEB	0	1	1
TBP	0	1	1
SRF	0	1	1
BCL6	0	1	1
TFDP2	0	1	1
TAF1B	0	1	1
PHTF1	0	1	1
ZBTB17	0	1	1
ZNHIT6	0	1	1
TGIF2	0	1	1
KLF12	0	1	1
HOXB3	0	1	1
MSX2	0	1	1
SMAD9	0	1	1
NR2C1	0	1	1
BATF3	0	1	1
MXD4	0	1	1
THRA	0	1	1
NR1D1	0	1	1
STAT5A	0	1	1
GLIS2	0	1	1
RBSN	0	1	1
THAP1	0	1	1
ZSWIM4	0	1	1
RFX1	0	1	1
ZNF414	0	1	1
TRAFD1	0	1	1
DMTF1	0	1	1
PHF21A	0	1	1
TFCP2	0	1	1
KAT7	0	1	1
FOXF2	0	1	1
JDP2	0	1	1
ZCCHC14	0	1	1
IRF8	0	1	1
GATA6	0	1	1
TP53	0	1	1
MBD1	0	1	1
SMAD4	0	1	1
ARNT	0	1	1
HMBOX1	0	1	1
MRRF	0	1	1
NOTCH1	0	1	1
FOXO1	0	1	1
ZDHHC7	0	1	1
BACH1	0	1	1
GATAD1	0	1	1
ZNF618	0	1	1
ZNF362	0	1	1
NR2F6	0	1	1
ZNF394	0	1	1
GMEB1	0	1	1
MSX1	0	1	1
ANKZF1	0	1	1
RCHY1	0	1	1
CREBRF	0	1	1
ZNF704	0	1	1
FOXK1	0	1	1
TAF10	0	1	1
SMAD3	0	1	1
PRRX2	0	1	1
ZNF226	0	1	1
ZNF668	0	1	1
ZNF444	0	1	1
THAP11	0	1	1
E2F6	0	1	1
ZBTB43	0	1	1
SIN3A	0	1	1
KLF13	0	1	1
ATF7	0	1	1
ZNF160	0	1	1
ZDHHC16	0	1	1
ZNF584	0	1	1
CERS6	0	1	1
ZNHIT2	0	1	1
ZBTB4	0	1	1
GTF2IRD2B	0	1	1
NR1D2	0	1	1
ZNF771	0	1	1
ZNF322	0	1	1
MTA1	0	1	1
SP1	0	1	1
ZDHHC17	0	1	1
ZNF626	0	1	1
ZC3H6	0	1	1
ZNF559	0	1	1
ZNF567	0	1	1
ZNF33A	0	1	1
ZBTB44	0	1	1
ZNF140	0	1	1
MKL1	0	1	1
ZNF136	0	1	1
ZNF181	0	1	1
ZNF677	0	1	1
ZNF770	0	1	1
HMGN5	0	1	1
MAFK	0	1	1
ZNF652	0	1	1
ZNF521	0	1	1
ZNF277	0	1	1
DZIP3	0	1	1
PBX2	0	1	1
ZBTB10	0	1	1
ZNF254	0	1	1
ZNF688	0	1	1
ZNF512	0	1	1
ETV5	0	1	1
ATF6	-0.00859808	0.99314	1
MEIS1	-0.0160572	0.987189	1
CREB3L2	-0.0950152	0.924303	1
SP3	-0.145427	0.884374	1
RBL2	-0.170042	0.864977	1
ZFAND2A	-0.181183	0.856224	1
IRF3	-0.200182	0.841338	1
MORC3	-0.201503	0.840305	1
SLC2A4RG	-0.267769	0.788877	1
MIER1	-0.352491	0.72447	1
ZC3H18	-0.362599	0.716905	1
FOXN3	-0.380875	0.703296	1
RARG	-0.386989	0.698765	1
E2F4	-0.468269	0.639592	0.946335
ZNF83	-0.477973	0.63267	0.938487
RNF4	-0.564044	0.572724	0.856134
ZNF830	-0.631186	0.527919	0.791197
PBX3	-0.674025	0.500295	0.757627
THAP7	-0.684583	0.493607	0.749456
PURB	-0.760738	0.446813	0.680188
GON4L	-0.7725	0.439818	0.671302
CEBPG	-0.823707	0.410106	0.627603
VDR	-0.858202	0.390781	0.601202
CXXC1	-0.878237	0.379815	0.587448
TCF12	-0.886342	0.375433	0.582222
ZNF503	-0.970326	0.331884	0.523078
TEAD1	-0.971376	0.331361	0.523078
SNAPC5	-1.03019	0.302919	0.481351
ZFYVE19	-1.0387	0.298942	0.476337
ZNF791	-1.05954	0.289352	0.463561
ZMAT3	-1.06017	0.289068	0.463561
TFDP1	-1.07276	0.283377	0.456552
CNOT8	-1.09603	0.273064	0.442393
ZPR1	-1.09748	0.272432	0.442393
SMAD5	-1.1562	0.247601	0.403394
RORA	-1.18021	0.237918	0.389809
CERS2	-1.18486	0.236072	0.38788
CERS5	-1.19376	0.232573	0.383217
ZHX1	-1.24776	0.212118	0.351509
MEF2A	-1.26726	0.205062	0.340791
ZRSR2	-1.2992	0.193876	0.323126
CLOCK	-1.3038	0.192303	0.321429
SPEN	-1.31789	0.187541	0.314376
GPBP1	-1.32164	0.186288	0.31318
RXRB	-1.32779	0.184249	0.310652
TAF12	-1.33933	0.180463	0.305156
BNC2	-1.36164	0.173311	0.294781
ZNF205	-1.37626	0.168741	0.287853
TBL1XR1	-1.37987	0.167628	0.286797
IFT57	-1.40276	0.160688	0.275737
ASH2L	-1.44297	0.14903	0.257254
ZNF267	-1.44326	0.148946	0.257254
SMARCA4	-1.4915	0.13583	0.235872
CREBZF	-1.53322	0.125222	0.218104
ZSWIM7	-1.55352	0.120298	0.21016
ZFP91	-1.55507	0.119929	0.210148
ZNF106	-1.56199	0.118291	0.207906
HEY2	-1.56834	0.116801	0.205911
ZFAND3	-1.56928	0.116583	0.205911
ZNF330	-1.57691	0.114816	0.20365
ATF2	-1.57975	0.114165	0.203115
FUBP3	-1.58732	0.11244	0.200662
RFXANK	-1.63385	0.10229	0.184824
MEIS2	-1.64246	0.100494	0.182145
ZNF32	-1.68736	0.0915335	0.166424
YEATS4	-1.68754	0.0914995	0.166424
RNF6	-1.69312	0.0904324	0.16546
STAT2	-1.69528	0.0900226	0.16546
ZMYM5	-1.69676	0.0897422	0.16546
BLZF1	-1.69717	0.0896642	0.16546
ZNF408	-1.71086	0.0871073	0.162072
KDM5A	-1.71558	0.0862397	0.161352
ZRANB2	-1.72392	0.0847223	0.159026
ZNF326	-1.74777	0.0805033	0.151774
TRIM27	-1.74874	0.0803353	0.151774
ZFAND1	-1.76747	0.0771492	0.147193
ELF2	-1.77801	0.075403	0.144814
ZNF302	-1.78006	0.0750669	0.144647
GLMP	-1.78135	0.0748548	0.144647
NFYC	-1.78684	0.0739629	0.143473
PURA	-1.80113	0.0716827	0.139517
TCEAL1	-1.80582	0.0709463	0.139016
ZFHX3	-1.82979	0.0672818	0.132733
AFF4	-1.85167	0.0640734	0.126835
ZCCHC11	-1.85908	0.0630163	0.125169
HDGF	-1.87794	0.0603894	0.120364
ZNF207	-1.89666	0.0578733	0.116147
MLXIP	-1.90125	0.0572691	0.115736
HDAC1	-1.91667	0.0552802	0.112107
ZNF706	-1.92299	0.0544817	0.110875
ATF6B	-1.93706	0.0527382	0.108469
ZKSCAN1	-1.94316	0.0519967	0.107324
TEAD3	-1.95194	0.0509451	0.105529
RERE	-1.95684	0.0503662	0.104704
TSC22D4	-1.9724	0.0485641	0.101687
ELK1	-1.97499	0.0482689	0.101435
CNOT7	-1.98	0.0477034	0.100611
CREB3	-1.9828	0.0473894	0.100313
PKNOX1	-1.983	0.0473678	0.100313
BPTF	-2.00682	0.0447685	0.0954621
ZNF146	-2.04419	0.0409352	0.0882619
ZCCHC24	-2.05003	0.0403615	0.0873494
ZNF148	-2.07691	0.0378098	0.0824424
SCYL1	-2.09618	0.0360662	0.0789373
ZFYVE21	-2.1009	0.0356494	0.0783207
ZBTB20	-2.14902	0.031633	0.0700272
KDM5B	-2.161	0.0306956	0.0682125
ZCCHC7	-2.17011	0.0299983	0.0669192
ZDHHC4	-2.17473	0.0296506	0.066399
TEAD2	-2.18348	0.0290003	0.0651945
CREB1	-2.1917	0.0284011	0.064096
ILF2	-2.19348	0.0282731	0.0640563
ZMYM4	-2.19708	0.028015	0.0637203
MAZ	-2.19814	0.0279392	0.0637203
BRD8	-2.19827	0.0279297	0.0637203
TEAD4	-2.20235	0.0276409	0.0636179
RELA	-2.20783	0.0272562	0.0632343
ZDHHC3	-2.21313	0.0268884	0.0626316
TAF7	-2.22798	0.0258817	0.0605298
TBX2	-2.24328	0.024879	0.0584202
MAX	-2.24469	0.0247881	0.0584202
ZDHHC6	-2.25074	0.0244021	0.0577683
HDAC2	-2.27163	0.0231091	0.0552082
HLX	-2.27365	0.0229869	0.0552082
CGGBP1	-2.27431	0.0229474	0.0552082
MSRB2	-2.28349	0.0224013	0.0543629
SLC30A9	-2.3119	0.0207834	0.0506485
MSL3	-2.32239	0.0202122	0.0494644
IRF7	-2.32266	0.0201975	0.0494644
ZEB2	-2.33066	0.0197715	0.0490063
LITAF	-2.33918	0.0193261	0.0481078
BAZ1B	-2.34081	0.0192418	0.0481045
TADA3	-2.34276	0.0191416	0.0480611
NR1H2	-2.3446	0.0190476	0.048033
PA2G4	-2.34731	0.0189097	0.0478936
PRKDC	-2.34753	0.0188984	0.0478936
VEZF1	-2.34967	0.0187901	0.0478936
ZMAT5	-2.35709	0.0184188	0.0472696
ZNF524	-2.40428	0.0162044	0.0425273
ZNF24	-2.40835	0.016025	0.0422476
GPBP1L1	-2.44433	0.0145121	0.0389676
ZCCHC17	-2.44444	0.0145076	0.0389676
NFKB2	-2.46567	0.0136756	0.0372388
ZMAT2	-2.47468	0.0133357	0.0364845
TAF6	-2.48079	0.0131091	0.0360869
ZNF622	-2.48346	0.0130113	0.0360869
ZBTB38	-2.48412	0.0129873	0.0360869
ZC3H13	-2.48572	0.012929	0.0360869
CUX1	-2.49235	0.0126902	0.0357298
ARID4A	-2.49968	0.0124305	0.0351691
TCF4	-2.52798	0.011472	0.0326164
RUNX1T1	-2.53413	0.0112728	0.0322081
ZNF280D	-2.53844	0.0111348	0.0319712
RPL7	-2.55141	0.0107287	0.0309585
REXO4	-2.56818	0.0102233	0.0296475
PHF5A	-2.58521	0.00973184	0.0283642
MTF2	-2.58562	0.00972042	0.0283642
HSF1	-2.58733	0.00967229	0.0283642
BBX	-2.59447	0.00947357	0.028034
ZNF292	-2.62133	0.00875876	0.0260517
ZDHHC24	-2.64484	0.008173	0.0244348
NCOR1	-2.64647	0.00813365	0.0244348
STAT1	-2.64692	0.00812298	0.0244348
PRRX1	-2.64867	0.00808096	0.0244348
ECSIT	-2.65463	0.00793955	0.0242365
ZNHIT1	-2.65617	0.00790329	0.0242365
ZDHHC12	-2.65693	0.00788557	0.0242365
HOXB4	-2.6652	0.00769435	0.0238648
SMAD2	-2.66778	0.00763534	0.0238091
ZCCHC9	-2.67795	0.00740734	0.0233492
SCAND1	-2.67928	0.00737816	0.0233492
VPS72	-2.68734	0.00720234	0.0229525
PHB	-2.68934	0.00715935	0.0229525
CREB3L1	-2.69881	0.00695884	0.0225482
KMT2A	-2.70677	0.00679407	0.022138
CAMTA1	-2.70729	0.0067834	0.022138
IRF2	-2.71286	0.00667045	0.0219822
CITED2	-2.7145	0.00663756	0.0219822
ZBED1	-2.73511	0.00623603	0.0207868
ZNF90	-2.73526	0.00623311	0.0207868
AEBP1	-2.75053	0.00594986	0.0201808
PML	-2.76837	0.0056337	0.0193346
HOXB6	-2.77129	0.00558352	0.0192764
SNAPC2	-2.78245	0.00539506	0.0188368
ZFAND6	-2.79405	0.00520518	0.0184086
ZCRB1	-2.79665	0.00516362	0.0183736
ZNF22	-2.80293	0.00506413	0.0181308
HAND2	-2.81376	0.00489657	0.0176398
DRAP1	-2.81502	0.00487745	0.0176398
ETV1	-2.82384	0.00474519	0.0176398
ETS1	-2.84345	0.00446281	0.0166996
ZNF581	-2.85673	0.00428025	0.0161204
MSC	-2.86422	0.00418043	0.0158474
BCLAF1	-2.86888	0.00411932	0.0157184
BUD31	-2.87094	0.00409256	0.0157184
ZNF281	-2.89334	0.0038117	0.0148375
DDIT3	-2.89761	0.00376018	0.0147358
TCF21	-2.93904	0.00329231	0.0132607
CIR1	-2.94315	0.00324895	0.0131776
ZNF511	-2.94485	0.00323113	0.0131776
TBX3	-2.94501	0.00322947	0.0131776
SNAI2	-2.95395	0.00313738	0.0130912
BHLHE41	-2.95956	0.00308083	0.0129484
RUNX2	-2.96017	0.00307466	0.0129484
CARHSP1	-2.96423	0.00303441	0.0129409
HMGB2	-2.97078	0.00297044	0.0127619
ZBTB8OS	-2.98073	0.00287561	0.0124467
MRPL28	-2.9836	0.00284877	0.0124232
EGR2	-2.98688	0.0028184	0.0123839
RBCK1	-2.98724	0.00281506	0.0123839
MLX	-2.99323	0.00276045	0.0123839
PFDN1	-3.00304	0.00267296	0.0121118
LMO4	-3.01068	0.00260661	0.0120947
ZNF703	-3.01848	0.00254044	0.0118827
BHLHE40	-3.02045	0.00252402	0.0118827
HMG20B	-3.03151	0.00243334	0.0116639
REST	-3.04615	0.00231794	0.0112975
SP100	-3.05774	0.00223013	0.0109617
NR3C1	-3.06774	0.00215684	0.010692
HES1	-3.06959	0.00214354	0.010692
NOTCH3	-3.12134	0.00180031	0.00930695
PREB	-3.12544	0.00177541	0.00927693
ZNF532	-3.12734	0.00176395	0.00927693
MAF	-3.16067	0.00157404	0.0084532
ZNF580	-3.18352	0.00145498	0.00788678
HOXB2	-3.19504	0.00139814	0.00774482
SNAI1	-3.20231	0.0013633	0.00767686
HOXB5	-3.20422	0.00135427	0.00767686
ZFPL1	-3.24097	0.00119125	0.00690925
MMP14	-3.27137	0.00107027	0.0064662
ZNF428	-3.29758	0.000975226	0.0060867
SUPT4H1	-3.33127	0.000864511	0.00557129
ZEB1	-3.34681	0.000817486	0.00551328
TWIST1	-3.3906	0.000697387	0.00493274
MEF2C	-3.40243	0.000667886	0.00478239
CNBP	-3.40286	0.000666839	0.00478239
MITF	-3.42126	0.000623323	0.00478239
NR2F2	-3.52848	0.000417958	0.00404026
WNT5A	-3.58034	0.000343143	0.0036186
ID3	-3.59246	0.000327574	0.00358478
KLF7	-3.59273	0.000327231	0.00358478
HEY1	-3.61264	0.000303092	0.00358478
HOPX	-3.61986	0.000294764	0.00358478
CTBP2	-3.63891	0.000273792	0.00352888
MAFB	-3.64935	0.000262907	0.00350603
YBX1	-3.70075	0.00021496	0.00333846
HES4	-3.72465	0.000195588	0.00324117
EDF1	-3.73635	0.000186707	0.00324117
SOX4	-3.78143	0.000155927	0.00321697
PRDM1	-3.90032	9.60674e-05	0.00265144
HMGB1	-3.97515	7.0334e-05	0.00214704
ID1	-4.05056	5.10947e-05	0.00179209
LEF1	-4.18833	2.8101e-05	0.00125374
TSC22D1	-4.65719	3.20552e-06	0.000430291
FOXS1	-4.69358	2.68463e-06	0.000430291
HEYL	-4.90474	9.35516e-07	0.000311647
