# Supplementary material for: Cross-Species Single-Cell Analysis of Pancreatic Ductal Adenocarcinoma Reveals Antigen-Presenting Cancer-Associated Fibroblasts
Source: Oxford University Press journal article supplement (doi:10.1158/2159-8290.cd-19-0094), 2019-06-13
Supplement: 21598290cd190094-sup-215864_2_supp_5552231_ps91bq.xlsx [file 21598290cd190094-sup-215864_2_supp_5552231_ps91bq.xlsx]

## Sheet: Cluster 1
	Score	Associated.Gene.Name	dbCluster	avgDiff
ENSMUSG00000002985	0.876996	Apoe	1	2.24718
ENSMUSG00000040026	0.616415	Saa3	1	2.17617
ENSMUSG00000036896	0.829414	C1qc	1	1.76786
ENSMUSG00000036887	0.82124	C1qa	1	1.75274
ENSMUSG00000036905	0.835204	C1qb	1	1.70948
ENSMUSG00000069516	0.892676	Lyz2	1	1.66319
ENSMUSG00000019987	0.748899	Arg1	1	1.55414
ENSMUSG00000038642	0.914975	Ctss	1	1.4598
ENSMUSG00000009185	0.589362	Ccl8	1	1.43829
ENSMUSG00000029373	0.706306	Pf4	1	1.41718
ENSMUSG00000032554	0.847609	Trf	1	1.2983
ENSMUSG00000019122	0.859178	Ccl9	1	1.29015
ENSMUSG00000079419	0.867848	Ms4a6c	1	1.26495
ENSMUSG00000049723	0.601354	Mmp12	1	1.22771
ENSMUSG00000026656	0.87874	Fcgr2b	1	1.2047
ENSMUSG00000073421	0.734477	H2-Ab1	1	1.18331
ENSMUSG00000064373	0.758422	Sepp1	1	1.17687
ENSMUSG00000024610	0.77005	Cd74	1	1.14338
ENSMUSG00000040152	0.762047	Thbs1	1	1.14025
ENSMUSG00000035373	0.623046	Ccl7	1	1.11433
ENSMUSG00000021190	0.808053	Lgmn	1	1.10574
ENSMUSG00000036594	0.724202	H2-Aa	1	1.0521
ENSMUSG00000024397	0.812054	Aif1	1	1.03053
ENSMUSG00000030560	0.833224	Ctsc	1	1.02716
ENSMUSG00000035493	0.799044	Tgfbi	1	1.01385

## Sheet: Cluster 2
	Score	Associated.Gene.Name	dbCluster	avgDiff
ENSMUSG00000061100	0.994923	Retnla	2	4.54775
ENSMUSG00000072596	0.897764	Ear2	2	1.99638
ENSMUSG00000069515	0.671086	Lyz1	2	1.72386
ENSMUSG00000098178	0.668142	Gm42418	2	1.28182
ENSMUSG00000006360	0.909068	Crip1	2	1.15272
ENSMUSG00000015568	0.777518	Lpl	2	1.10982
ENSMUSG00000064356	0.750211	mt-Atp8	2	1.07929

## Sheet: Cluster 3
	Score	Associated.Gene.Name	dbCluster	avgDiff
ENSMUSG00000003379	0.996383	Cd79a	3	2.9489
ENSMUSG00000034634	0.941378	Ly6d	3	2.36663
ENSMUSG00000024673	0.962665	Ms4a1	3	2.07551
ENSMUSG00000040592	0.925231	Cd79b	3	1.98397
ENSMUSG00000057098	0.929466	Ebf1	3	1.83159
ENSMUSG00000037548	0.947415	H2-DMb2	3	1.75505
ENSMUSG00000042474	0.870272	Fcmr	3	1.72961
ENSMUSG00000030798	0.948025	Cd37	3	1.62317
ENSMUSG00000045826	0.895117	Ptprcap	3	1.47163
ENSMUSG00000090733	0.983528	Rps27	3	1.39365
ENSMUSG00000050621	0.959342	Rps27rt	3	1.38708
ENSMUSG00000041538	0.852758	H2-Ob	3	1.34287
ENSMUSG00000024353	0.795222	Mzb1	3	1.3293
ENSMUSG00000024399	0.840633	Ltb	3	1.30732
ENSMUSG00000047867	0.838066	Gimap6	3	1.29254
ENSMUSG00000005583	0.813306	Mef2c	3	1.25097
ENSMUSG00000037922	0.803288	Bank1	3	1.18261
ENSMUSG00000104710	0.768391	Gm43603	3	1.11032
ENSMUSG00000024334	0.778288	H2-Oa	3	1.09842
ENSMUSG00000090019	0.776723	Gimap1	3	1.04718
ENSMUSG00000045128	0.972155	Rpl18a	3	1.03738

## Sheet: Cluster 4
	Score	Associated.Gene.Name	dbCluster	avgDiff
ENSMUSG00000056054	0.950419	S100a8	4	4.63128
ENSMUSG00000056071	0.943296	S100a9	4	4.45819
ENSMUSG00000009633	0.931684	G0s2	4	3.65721
ENSMUSG00000026073	0.959493	Il1r2	4	2.64228
ENSMUSG00000022651	0.619375	Retnlg	4	2.49578
ENSMUSG00000079597	0.690769	Gm5483	4	2.4768
ENSMUSG00000017737	0.894926	Mmp9	4	2.11885
ENSMUSG00000027398	0.881304	Il1b	4	1.8687
ENSMUSG00000032484	0.525598	Ngp	4	1.8384
ENSMUSG00000056501	0.895207	Cebpb	4	1.82608
ENSMUSG00000025491	0.64102	Ifitm1	4	1.75256
ENSMUSG00000000805	0.661128	Car4	4	1.71468
ENSMUSG00000051748	0.691699	Wfdc21	4	1.69197
ENSMUSG00000031722	0.82767	Hp	4	1.69048
ENSMUSG00000026822	0.648587	Lcn2	4	1.66408
ENSMUSG00000058427	0.769574	Cxcl2	4	1.63471
ENSMUSG00000045502	0.731868	Hcar2	4	1.62373
ENSMUSG00000000982	0.564829	Ccl3	4	1.60428
ENSMUSG00000043953	0.714256	Ccrl2	4	1.57551
ENSMUSG00000031584	0.890386	Gsr	4	1.55085
ENSMUSG00000020407	0.787187	Upp1	4	1.51536
ENSMUSG00000052212	0.729823	Cd177	4	1.39619
ENSMUSG00000029379	0.551747	Cxcl3	4	1.36396
ENSMUSG00000027360	0.746129	Hdc	4	1.35395
ENSMUSG00000026981	0.794842	Il1rn	4	1.34595
ENSMUSG00000047139	0.821341	Cd24a	4	1.331
ENSMUSG00000026879	0.847362	Gsn	4	1.32714
ENSMUSG00000035105	0.713488	Egln3	4	1.30983
ENSMUSG00000024014	0.841443	Pim1	4	1.2832
ENSMUSG00000024590	0.792079	Lmnb1	4	1.26287
ENSMUSG00000042265	0.778846	Trem1	4	1.26186
ENSMUSG00000027399	0.618994	Il1a	4	1.23284
ENSMUSG00000028859	0.76426	Csf3r	4	1.23204
ENSMUSG00000047798	0.803738	Cd300lf	4	1.22956
ENSMUSG00000053338	0.710809	Tarm1	4	1.20217
ENSMUSG00000033213	0.7698	AA467197	4	1.19173
ENSMUSG00000026180	0.76047	Cxcr2	4	1.19019
ENSMUSG00000023046	0.71479	Igfbp6	4	1.17518
ENSMUSG00000022876	0.78495	Samsn1	4	1.15656
ENSMUSG00000022018	0.703318	Rgcc	4	1.15569
ENSMUSG00000022564	0.750902	Grina	4	1.15026
ENSMUSG00000030403	0.823179	Vasp	4	1.1467
ENSMUSG00000038357	0.515993	Camp	4	1.13879
ENSMUSG00000030142	0.706479	Clec4e	4	1.12147
ENSMUSG00000020423	0.8039	Btg2	4	1.11285
ENSMUSG00000024856	0.706337	Cdk2ap2	4	1.1092
ENSMUSG00000039013	0.724679	Siglecf	4	1.10266
ENSMUSG00000020077	0.878229	Srgn	4	1.10236
ENSMUSG00000033220	0.843132	Rac2	4	1.10181
ENSMUSG00000023067	0.767959	Cdkn1a	4	1.06503
ENSMUSG00000001156	0.703243	Mxd1	4	1.02343
ENSMUSG00000030413	0.642918	Pglyrp1	4	1.01919

## Sheet: Cluster 5
	Score	Associated.Gene.Name	dbCluster	avgDiff
ENSMUSG00000019929	0.992737	Dcn	5	3.83323
ENSMUSG00000026043	0.999669	Col3a1	5	3.7864
ENSMUSG00000001506	0.997071	Col1a1	5	3.41786
ENSMUSG00000018593	0.993924	Sparc	5	3.28871
ENSMUSG00000029661	0.997463	Col1a2	5	3.28093
ENSMUSG00000030218	0.890118	Mgp	5	3.09481
ENSMUSG00000031375	0.991098	Bgn	5	3.00117
ENSMUSG00000036256	0.988747	Igfbp7	5	2.82919
ENSMUSG00000023224	0.999124	Serping1	5	2.77351
ENSMUSG00000024164	0.922962	C3	5	2.70862
ENSMUSG00000070436	0.99569	Serpinh1	5	2.62868
ENSMUSG00000017493	0.97313	Igfbp4	5	2.49469
ENSMUSG00000030116	0.917394	Mfap5	5	2.39887
ENSMUSG00000036446	0.891464	Lum	5	2.29577
ENSMUSG00000022665	0.993282	Ccdc80	5	2.15614
ENSMUSG00000018339	0.896439	Gpx3	5	2.12417
ENSMUSG00000086320	0.919915	Gm12840	5	2.07648
ENSMUSG00000020473	0.991999	Aebp1	5	2.01686
ENSMUSG00000004951	0.898761	Hspb1	5	1.97563
ENSMUSG00000022816	0.988221	Fstl1	5	1.96234
ENSMUSG00000001131	0.872544	Timp1	5	1.88637
ENSMUSG00000021268	0.931296	Meg3	5	1.88093
ENSMUSG00000031239	0.817138	Itm2a	5	1.87661
ENSMUSG00000026879	0.823521	Gsn	5	1.87614
ENSMUSG00000024011	0.775176	Pi16	5	1.8591
ENSMUSG00000075602	0.835072	Ly6a	5	1.78531
ENSMUSG00000025784	0.761233	Clec3b	5	1.74965
ENSMUSG00000031740	0.936086	Mmp2	5	1.74429
ENSMUSG00000000753	0.933503	Serpinf1	5	1.73443
ENSMUSG00000020186	0.943077	Csrp2	5	1.73151
ENSMUSG00000046402	0.934005	Rbp1	5	1.72339
ENSMUSG00000029718	0.95631	Pcolce	5	1.71763
ENSMUSG00000027204	0.911966	Fbn1	5	1.71006
ENSMUSG00000038521	0.981344	C1s1	5	1.69759
ENSMUSG00000032334	0.98163	Loxl1	5	1.69067
ENSMUSG00000031548	0.783336	Sfrp1	5	1.68827
ENSMUSG00000041120	0.927278	Nbl1	5	1.66166
ENSMUSG00000031762	0.836058	Mt2	5	1.65514
ENSMUSG00000001119	0.958604	Col6a1	5	1.6238
ENSMUSG00000009281	0.952546	Rarres2	5	1.60518
ENSMUSG00000026574	0.796118	Dpt	5	1.60345
ENSMUSG00000027996	0.77837	Sfrp2	5	1.57617
ENSMUSG00000079018	0.746817	Ly6c1	5	1.56454
ENSMUSG00000029675	0.829338	Eln	5	1.5607
ENSMUSG00000026042	0.963245	Col5a2	5	1.54643
ENSMUSG00000068220	0.890291	Lgals1	5	1.52413
ENSMUSG00000064080	0.943641	Fbln2	5	1.52043
ENSMUSG00000020044	0.830483	Timp3	5	1.51227
ENSMUSG00000027848	0.88108	Olfml3	5	1.50449
ENSMUSG00000075702	0.960807	Selm	5	1.45636
ENSMUSG00000027408	0.904915	Cpxm1	5	1.45597
ENSMUSG00000020053	0.863784	Igf1	5	1.44962
ENSMUSG00000023046	0.885847	Igfbp6	5	1.44453
ENSMUSG00000020241	0.945464	Col6a2	5	1.43446
ENSMUSG00000048332	0.955189	Lhfp	5	1.40887
ENSMUSG00000019539	0.9383	Rcn3	5	1.40423
ENSMUSG00000017969	0.905834	Ptgis	5	1.38986
ENSMUSG00000039405	0.888905	Prss23	5	1.37671
ENSMUSG00000029761	0.94201	Cald1	5	1.36163
ENSMUSG00000020467	0.841055	Efemp1	5	1.35711
ENSMUSG00000020810	0.876528	Cygb	5	1.354
ENSMUSG00000037060	0.942202	Prkcdbp	5	1.33283
ENSMUSG00000005397	0.911439	Nid1	5	1.32595
ENSMUSG00000020676	0.734524	Ccl11	5	1.32375
ENSMUSG00000074457	0.937687	S100a16	5	1.28818
ENSMUSG00000024538	0.938004	Ppic	5	1.28792
ENSMUSG00000032011	0.829807	Thy1	5	1.2872
ENSMUSG00000006369	0.901021	Fbln1	5	1.27787
ENSMUSG00000022371	0.749512	Col14a1	5	1.26026
ENSMUSG00000021876	0.930973	Rnase4	5	1.24284
ENSMUSG00000055172	0.942837	C1ra	5	1.23865
ENSMUSG00000027750	0.780943	Postn	5	1.22573
ENSMUSG00000060572	0.893453	Mfap2	5	1.2242
ENSMUSG00000075254	0.91739	Heg1	5	1.21687
ENSMUSG00000045573	0.70607	Penk	5	1.20263
ENSMUSG00000020427	0.661173	Igfbp3	5	1.19976
ENSMUSG00000031538	0.916536	Plat	5	1.1959
ENSMUSG00000028195	0.813589	Cyr61	5	1.19396
ENSMUSG00000029096	0.831143	Htra3	5	1.18822
ENSMUSG00000036545	0.934624	Adamts2	5	1.18591
ENSMUSG00000073889	0.897921	Il11ra1	5	1.18277
ENSMUSG00000024529	0.904841	Lox	5	1.17784
ENSMUSG00000060962	0.726527	Dmkn	5	1.17563
ENSMUSG00000031380	0.78885	Figf	5	1.16853
ENSMUSG00000017002	0.550484	Slpi	5	1.16219
ENSMUSG00000021390	0.772355	Ogn	5	1.15478
ENSMUSG00000072235	0.848629	Tuba1a	5	1.15422
ENSMUSG00000042436	0.741239	Mfap4	5	1.14102
ENSMUSG00000028517	0.809389	Plpp3	5	1.12938
ENSMUSG00000029070	0.935323	Mxra8	5	1.12809
ENSMUSG00000037499	0.947632	Nenf	5	1.12497
ENSMUSG00000026249	0.686159	Serpine2	5	1.12096
ENSMUSG00000003665	0.769643	Has1	5	1.1062
ENSMUSG00000033327	0.7988	Tnxb	5	1.09757
ENSMUSG00000021091	0.83685	Serpina3n	5	1.08624
ENSMUSG00000072941	0.878953	Sod3	5	1.07432
ENSMUSG00000031633	0.923281	Slc25a4	5	1.0694
ENSMUSG00000053931	0.888877	Cnn3	5	1.06633
ENSMUSG00000024909	0.943061	Efemp2	5	1.06487
ENSMUSG00000032216	0.932434	Nedd4	5	1.06056
ENSMUSG00000056481	0.841553	Cd248	5	1.05795
ENSMUSG00000042712	0.868054	Wbp5	5	1.05349
ENSMUSG00000029061	0.920581	Mmp23	5	1.05125
ENSMUSG00000030669	0.601545	Calca	5	1.04684
ENSMUSG00000052684	0.800815	Jun	5	1.04439
ENSMUSG00000036570	0.910674	Fxyd1	5	1.04383
ENSMUSG00000037379	0.756112	Spon2	5	1.03974
ENSMUSG00000029309	0.711376	Sparcl1	5	1.03149
ENSMUSG00000004044	0.898856	Ptrf	5	1.02985
ENSMUSG00000061353	0.728545	Cxcl12	5	1.02907
ENSMUSG00000020585	0.9248	Laptm4a	5	1.02825
ENSMUSG00000027832	0.66478	Ptx3	5	1.01897
ENSMUSG00000028369	0.75675	Svep1	5	1.01864
ENSMUSG00000040249	0.867537	Lrp1	5	1.01547
ENSMUSG00000026837	0.888307	Col5a1	5	1.00808
ENSMUSG00000008540	0.85169	Mgst1	5	1.00799
ENSMUSG00000031502	0.860492	Col4a1	5	1.00288

## Sheet: Cluster 6
	Score	Associated.Gene.Name	dbCluster	avgDiff
ENSMUSG00000035042	0.600905	Ccl5	6	2.37212
ENSMUSG00000002033	0.928389	Cd3g	6	1.91285
ENSMUSG00000024399	0.889159	Ltb	6	1.89603
ENSMUSG00000032094	0.928497	Cd3d	6	1.84955
ENSMUSG00000032093	0.913383	Cd3e	6	1.78855
ENSMUSG00000023132	0.526842	Gzma	6	1.56875
ENSMUSG00000004612	0.660069	Nkg7	6	1.55255
ENSMUSG00000030742	0.874549	Lat	6	1.53074
ENSMUSG00000032011	0.854347	Thy1	6	1.51876
ENSMUSG00000045826	0.851075	Ptprcap	6	1.50726
ENSMUSG00000075010	0.783643	AW112010	6	1.46483
ENSMUSG00000056290	0.773962	Ms4a4b	6	1.45915
ENSMUSG00000066278	0.831242	Vps37b	6	1.3789
ENSMUSG00000025929	0.572537	Il17a	6	1.35883
ENSMUSG00000000409	0.840977	Lck	6	1.29002
ENSMUSG00000000486	0.833059	Sept1	6	1.23151
ENSMUSG00000032035	0.81933	Ets1	6	1.2105
ENSMUSG00000039264	0.814555	Gimap3	6	1.19628
ENSMUSG00000025647	0.869671	Shisa5	6	1.19534
ENSMUSG00000001281	0.789779	Itgb7	6	1.19101
ENSMUSG00000029075	0.630383	Tnfrsf4	6	1.18601
ENSMUSG00000050621	0.853413	Rps27rt	6	1.14608
ENSMUSG00000090733	0.909321	Rps27	6	1.13774
ENSMUSG00000060550	0.81625	H2-Q7	6	1.129
ENSMUSG00000090019	0.77672	Gimap1	6	1.10643
ENSMUSG00000031532	0.833279	Saraf	6	1.09949
ENSMUSG00000048521	0.650756	Cxcr6	6	1.08942
ENSMUSG00000040699	0.83892	Limd2	6	1.06771
ENSMUSG00000047867	0.740336	Gimap6	6	1.05499
ENSMUSG00000027863	0.73188	Cd2	6	1.05466
ENSMUSG00000041954	0.686424	Tnfrsf18	6	1.03991
ENSMUSG00000003882	0.733115	Il7r	6	1.03404
ENSMUSG00000074129	0.920488	Rpl13a	6	1.03217
ENSMUSG00000031880	0.678903	Rrad	6	1.01664

## Sheet: Cluster 7
	Score	Associated.Gene.Name	dbCluster	avgDiff
ENSMUSG00000022037	0.984216	Clu	7	4.174
ENSMUSG00000024028	0.711667	Tff2	7	3.76583
ENSMUSG00000024032	0.664047	Tff1	7	2.98305
ENSMUSG00000023043	0.9892	Krt18	7	2.90329
ENSMUSG00000030048	0.680601	Gkn3	7	2.80507
ENSMUSG00000029819	0.647582	Npy	7	2.62541
ENSMUSG00000030050	0.671289	Gkn1	7	2.55921
ENSMUSG00000049382	0.97672	Krt8	7	2.4694
ENSMUSG00000020911	0.900905	Krt19	7	2.32842
ENSMUSG00000023039	0.884845	Krt7	7	2.21467
ENSMUSG00000045394	0.915311	Epcam	7	2.1624
ENSMUSG00000017723	0.894421	Wfdc2	7	2.15001
ENSMUSG00000030049	0.566068	Gkn2	7	2.09372
ENSMUSG00000053964	0.769561	Lgals4	7	2.09339
ENSMUSG00000024029	0.55277	Tff3	7	1.94
ENSMUSG00000057092	0.884081	Fxyd3	7	1.92357
ENSMUSG00000074227	0.961399	Spint2	7	1.8988
ENSMUSG00000001025	0.876744	S100a6	7	1.77352
ENSMUSG00000004552	0.911443	Ctse	7	1.74979
ENSMUSG00000046727	0.947115	Cystm1	7	1.73377
ENSMUSG00000025467	0.605837	Prap1	7	1.71211
ENSMUSG00000029304	0.79215	Spp1	7	1.70794
ENSMUSG00000020581	0.685687	Agr2	7	1.66804
ENSMUSG00000030587	0.950118	2200002D01Rik	7	1.63321
ENSMUSG00000047517	0.685806	Dmbt1	7	1.55996
ENSMUSG00000021268	0.674481	Meg3	7	1.54571
ENSMUSG00000043501	0.651449	Lgals2	7	1.52944
ENSMUSG00000032348	0.789777	Gsta4	7	1.43422
ENSMUSG00000020592	0.866019	Sdc1	7	1.39059
ENSMUSG00000030413	0.757342	Pglyrp1	7	1.37904
ENSMUSG00000044303	0.863483	Cdkn2a	7	1.37437
ENSMUSG00000022010	0.871085	Tsc22d1	7	1.3174
ENSMUSG00000045991	0.897154	Onecut2	7	1.29053
ENSMUSG00000034127	0.896956	Tspan8	7	1.27852
ENSMUSG00000037852	0.836955	Cpe	7	1.25553
ENSMUSG00000018569	0.838695	Cldn7	7	1.21864
ENSMUSG00000048191	0.552149	Muc6	7	1.14563
ENSMUSG00000015932	0.90233	Dstn	7	1.14142
ENSMUSG00000046804	0.674095	Phgr1	7	1.12792
ENSMUSG00000046402	0.876549	Rbp1	7	1.12215
ENSMUSG00000042784	0.805642	Muc1	7	1.09576
ENSMUSG00000037145	0.648805	2210407C18Rik	7	1.0793
ENSMUSG00000023905	0.815986	Tnfrsf12a	7	1.0727
ENSMUSG00000023175	0.871058	Bsg	7	1.06794
ENSMUSG00000027801	0.742494	Tm4sf4	7	1.0663
ENSMUSG00000025068	0.771669	Gsto1	7	1.05608
ENSMUSG00000042306	0.771807	S100a14	7	1.05587
ENSMUSG00000026576	0.802333	Atp1b1	7	1.03932
ENSMUSG00000032231	0.770542	Anxa2	7	1.03556
ENSMUSG00000029086	0.790282	Prom1	7	1.03184
ENSMUSG00000044258	0.660099	Ctla2a	7	1.02888
ENSMUSG00000075602	0.700094	Ly6a	7	1.02727
ENSMUSG00000059654	0.56072	Reg1	7	1.02303
ENSMUSG00000064080	0.740274	Fbln2	7	1.00183

## Sheet: Cluster 8
	Score	Associated.Gene.Name	dbCluster	avgDiff
ENSMUSG00000036256	0.997293	Igfbp7	8	3.77684
ENSMUSG00000034845	0.966824	Plvap	8	3.02226
ENSMUSG00000018593	0.988072	Sparc	8	2.99592
ENSMUSG00000020427	0.847459	Igfbp3	8	2.63147
ENSMUSG00000062515	0.876072	Fabp4	8	2.6131
ENSMUSG00000004655	0.915716	Aqp1	8	2.53559
ENSMUSG00000032766	0.962123	Gng11	8	2.32379
ENSMUSG00000026921	0.991298	Egfl7	8	2.28756
ENSMUSG00000031502	0.996412	Col4a1	8	2.21936
ENSMUSG00000044258	0.948931	Ctla2a	8	2.20445
ENSMUSG00000079018	0.926855	Ly6c1	8	2.17846
ENSMUSG00000001946	0.974847	Esam	8	2.14716
ENSMUSG00000016494	0.973314	Cd34	8	2.13029
ENSMUSG00000031503	0.996865	Col4a2	8	2.08989
ENSMUSG00000022579	0.843902	Gpihbp1	8	2.08869
ENSMUSG00000070436	0.956452	Serpinh1	8	2.07796
ENSMUSG00000026814	0.960555	Eng	8	2.05807
ENSMUSG00000027800	0.969059	Tm4sf1	8	2.01008
ENSMUSG00000029309	0.945832	Sparcl1	8	1.99692
ENSMUSG00000037060	0.952218	Prkcdbp	8	1.97635
ENSMUSG00000020717	0.965317	Pecam1	8	1.96067
ENSMUSG00000054690	0.958651	Emcn	8	1.95646
ENSMUSG00000006356	0.96887	Crip2	8	1.93455
ENSMUSG00000031871	0.958573	Cdh5	8	1.89923
ENSMUSG00000073599	0.957087	Ecscr	8	1.85372
ENSMUSG00000046402	0.904028	Rbp1	8	1.79069
ENSMUSG00000042116	0.924006	Vwa1	8	1.78765
ENSMUSG00000001240	0.982248	Ramp2	8	1.75175
ENSMUSG00000022661	0.961182	Cd200	8	1.6652
ENSMUSG00000037095	0.826958	Lrg1	8	1.64759
ENSMUSG00000032966	0.991706	Fkbp1a	8	1.61064
ENSMUSG00000041378	0.810738	Cldn5	8	1.57889
ENSMUSG00000024538	0.939755	Ppic	8	1.57077
ENSMUSG00000055044	0.955761	Pdlim1	8	1.56991
ENSMUSG00000068735	0.836141	Trp53i11	8	1.56082
ENSMUSG00000044338	0.843433	Aplnr	8	1.5475
ENSMUSG00000007655	0.892616	Cav1	8	1.5467
ENSMUSG00000039405	0.850149	Prss23	8	1.53657
ENSMUSG00000050493	0.914926	Fam167b	8	1.53546
ENSMUSG00000027435	0.910563	Cd93	8	1.50731
ENSMUSG00000028763	0.927744	Hspg2	8	1.50164
ENSMUSG00000022010	0.871848	Tsc22d1	8	1.4911
ENSMUSG00000026728	0.838872	Vim	8	1.47577
ENSMUSG00000001435	0.897796	Col18a1	8	1.40844
ENSMUSG00000007872	0.866313	Id3	8	1.40294
ENSMUSG00000028339	0.869937	Col15a1	8	1.3992
ENSMUSG00000002504	0.911683	Slc9a3r2	8	1.39235
ENSMUSG00000029648	0.886977	Flt1	8	1.39171
ENSMUSG00000075602	0.813809	Ly6a	8	1.36907
ENSMUSG00000048572	0.876655	Tmem252	8	1.35277
ENSMUSG00000037706	0.88412	Cd81	8	1.32394
ENSMUSG00000029581	0.918358	Fscn1	8	1.32282
ENSMUSG00000079037	0.849623	Prnp	8	1.28973
ENSMUSG00000053477	0.939089	Tcf4	8	1.28108
ENSMUSG00000041445	0.866863	Mmrn2	8	1.2757
ENSMUSG00000017493	0.862078	Igfbp4	8	1.26041
ENSMUSG00000032135	0.858385	Mcam	8	1.25816
ENSMUSG00000004951	0.875497	Hspb1	8	1.25653
ENSMUSG00000028195	0.742103	Cyr61	8	1.24336
ENSMUSG00000001930	0.845402	Vwf	8	1.22001
ENSMUSG00000033191	0.942089	Tie1	8	1.21737
ENSMUSG00000062960	0.859293	Kdr	8	1.21593
ENSMUSG00000044562	0.907232	Rasip1	8	1.21177
ENSMUSG00000026421	0.857635	Csrp1	8	1.20036
ENSMUSG00000031799	0.925781	Tpm4	8	1.17597
ENSMUSG00000039167	0.876432	Adgrl4	8	1.15577
ENSMUSG00000076431	0.833012	Sox4	8	1.15517
ENSMUSG00000074457	0.896399	S100a16	8	1.15176
ENSMUSG00000040488	0.806777	Ltbp4	8	1.14356
ENSMUSG00000025510	0.94824	Cd151	8	1.14213
ENSMUSG00000024140	0.80047	Epas1	8	1.14169
ENSMUSG00000067925	0.847387	Cxx1a	8	1.13355
ENSMUSG00000002233	0.866745	Rhoc	8	1.13348
ENSMUSG00000047867	0.935255	Gimap6	8	1.13335
ENSMUSG00000021759	0.783007	Plpp1	8	1.13083
ENSMUSG00000020315	0.882849	Sptbn1	8	1.12296
ENSMUSG00000053931	0.921351	Cnn3	8	1.1226
ENSMUSG00000022528	0.734887	Hes1	8	1.10868
ENSMUSG00000027523	0.937309	Gnas	8	1.10437
ENSMUSG00000037936	0.847076	Scarb1	8	1.104
ENSMUSG00000032548	0.723172	Slco2a1	8	1.09734
ENSMUSG00000031841	0.885425	Cdh13	8	1.08926
ENSMUSG00000045377	0.889895	Tmem88	8	1.08348
ENSMUSG00000027954	0.852115	Efna1	8	1.08297
ENSMUSG00000050105	0.860465	Grrp1	8	1.06909
ENSMUSG00000038235	0.866682	F11r	8	1.06442
ENSMUSG00000001029	0.826443	Icam2	8	1.02843
ENSMUSG00000074364	0.890814	Ehd2	8	1.02642
ENSMUSG00000028517	0.785398	Plpp3	8	1.01459
ENSMUSG00000034751	0.82893	Mast4	8	1.00377

## Sheet: Cluster 9
	Score	Associated.Gene.Name	dbCluster	avgDiff
ENSMUSG00000035042	0.94671	Ccl5	9	3.28743
ENSMUSG00000029581	0.967256	Fscn1	9	3.16818
ENSMUSG00000037944	0.998837	Ccr7	9	2.88448
ENSMUSG00000031779	0.959399	Ccl22	9	2.77175
ENSMUSG00000050912	0.994689	Tmem123	9	2.30742
ENSMUSG00000031780	0.863213	Ccl17	9	2.21764
ENSMUSG00000042842	0.924712	Serpinb6b	9	2.04927
ENSMUSG00000027533	0.906944	Fabp5	9	2.0355
ENSMUSG00000033083	0.957278	Tbc1d4	9	1.79346
ENSMUSG00000018819	0.977281	Lsp1	9	1.71332
ENSMUSG00000003352	0.951298	Cacnb3	9	1.70398
ENSMUSG00000027447	0.908433	Cst3	9	1.67288
ENSMUSG00000048277	0.97708	Syngr2	9	1.65755
ENSMUSG00000041046	0.907103	Ramp3	9	1.64565
ENSMUSG00000079197	0.979595	Psme2	9	1.63206
ENSMUSG00000022540	0.975358	Rogdi	9	1.62902
ENSMUSG00000095595	0.973092	Fam177a	9	1.59308
ENSMUSG00000020644	0.935552	Id2	9	1.57181
ENSMUSG00000075010	0.830743	AW112010	9	1.54653
ENSMUSG00000045827	0.931406	Serpinb9	9	1.53286
ENSMUSG00000019528	0.886204	Gyg	9	1.47151
ENSMUSG00000074141	0.89699	Il4i1	9	1.41177
ENSMUSG00000002983	0.960163	Relb	9	1.40879
ENSMUSG00000026832	0.940619	Cytip	9	1.40209
ENSMUSG00000026875	0.955312	Traf1	9	1.3944
ENSMUSG00000001175	0.939301	Calm1	9	1.37797
ENSMUSG00000047945	0.918076	Marcksl1	9	1.33637
ENSMUSG00000004665	0.95061	Cnn2	9	1.32949
ENSMUSG00000024338	0.931576	Psmb8	9	1.29935
ENSMUSG00000022014	0.823214	Epsti1	9	1.27398
ENSMUSG00000022876	0.93043	Samsn1	9	1.26359
ENSMUSG00000072235	0.871667	Tuba1a	9	1.21511
ENSMUSG00000086862	0.861801	Gm13546	9	1.18972
ENSMUSG00000026421	0.85318	Csrp1	9	1.18329
ENSMUSG00000020437	0.920128	Myo1g	9	1.17405
ENSMUSG00000028100	0.890195	Nudt17	9	1.16735
ENSMUSG00000028965	0.818785	Tnfrsf9	9	1.16537
ENSMUSG00000006360	0.89526	Crip1	9	1.16117
ENSMUSG00000025825	0.933031	Iscu	9	1.15174
ENSMUSG00000019876	0.785831	Pkib	9	1.14934
ENSMUSG00000062825	0.931929	Actg1	9	1.13659
ENSMUSG00000022216	0.89372	Psme1	9	1.11626
ENSMUSG00000060600	0.843883	Eno3	9	1.1014
ENSMUSG00000032324	0.806496	Tspan3	9	1.09182
ENSMUSG00000015396	0.876632	Cd83	9	1.08539
ENSMUSG00000060550	0.882336	H2-Q7	9	1.07962
ENSMUSG00000028480	0.830724	Glipr2	9	1.07945
ENSMUSG00000026670	0.802248	Uap1	9	1.07484
ENSMUSG00000020027	0.858053	Socs2	9	1.07476
ENSMUSG00000033326	0.759444	Kdm4a	9	1.0706
ENSMUSG00000099974	0.899617	Bcl2a1d	9	1.05099
ENSMUSG00000022661	0.831028	Cd200	9	1.04564
ENSMUSG00000020275	0.868276	Rel	9	1.04413
ENSMUSG00000048163	0.896194	Selplg	9	1.00754

## Sheet: Cluster 10
	Score	Associated.Gene.Name	dbCluster	avgDiff
ENSMUSG00000031957	0.999947	Ctrb1	10	6.61435
ENSMUSG00000024225	0.998696	Clps	10	5.56478
ENSMUSG00000057163	0.999729	Prss2	10	5.43497
ENSMUSG00000036938	0.999825	Try5	10	5.28289
ENSMUSG00000071356	0.99769	Reg3b	10	4.91818
ENSMUSG00000059654	0.987996	Reg1	10	4.85914
ENSMUSG00000023433	0.978241	Cela3b	10	4.83095
ENSMUSG00000023140	0.999293	Reg2	10	4.77609
ENSMUSG00000029882	0.977951	2210010C04Rik	10	4.51262
ENSMUSG00000054106	0.967899	Try4	10	4.51241
ENSMUSG00000011463	0.967966	Cpb1	10	4.43563
ENSMUSG00000084174	0.967665	Sycn	10	4.36353
ENSMUSG00000042179	0.978663	Pnliprp1	10	4.25563
ENSMUSG00000035896	0.999624	Rnase1	10	4.19057
ENSMUSG00000054446	0.999561	Cpa1	10	3.9913
ENSMUSG00000024503	0.947053	Spink1	10	3.60755
ENSMUSG00000079516	0.946872	Reg3a	10	3.56159
ENSMUSG00000023031	0.952148	Cela1	10	3.55096
ENSMUSG00000049350	0.925809	Zg16	10	3.48704
ENSMUSG00000046008	0.894743	Pnlip	10	3.4448
ENSMUSG00000026818	0.968149	Cel	10	3.27942
ENSMUSG00000031896	0.94709	Ctrl	10	3.12122
ENSMUSG00000030017	0.914763	Reg3g	10	3.09347
ENSMUSG00000058579	0.947259	Cela2a	10	2.82569
ENSMUSG00000063903	0.93653	Klk1	10	2.69447
ENSMUSG00000047517	0.929947	Dmbt1	10	2.69042
ENSMUSG00000030717	0.878995	Nupr1	10	2.61461
ENSMUSG00000030954	0.905487	Gp2	10	2.32333
ENSMUSG00000071553	0.905729	Cpa2	10	2.1531
ENSMUSG00000071517	0.770053	Gm10334	10	2.09667
ENSMUSG00000025091	0.916431	Pnliprp2	10	1.95013
ENSMUSG00000029522	0.832302	Pla2g1b	10	1.88512
ENSMUSG00000071519	0.697362	Prss3	10	1.80889
ENSMUSG00000096525	0.614403	Gm2663	10	1.62597
ENSMUSG00000068341	0.874797	Reg3d	10	1.58221
ENSMUSG00000024028	0.909083	Tff2	10	1.52129
ENSMUSG00000024184	0.791491	Pdia2	10	1.23809
ENSMUSG00000031762	0.808184	Mt2	10	1.2354
ENSMUSG00000071521	0.791556	Try10	10	1.23243
ENSMUSG00000030219	0.790021	Erp27	10	1.01853
ENSMUSG00000040205	0.802006	Cuzd1	10	1.00881

[truncated: 2 more sheets: Cluster 11, Cluster 12]
