# Supplementary material for: Cross-Species Single-Cell Analysis of Pancreatic Ductal Adenocarcinoma Reveals Antigen-Presenting Cancer-Associated Fibroblasts
Source: Oxford University Press journal article supplement (doi:10.1158/2159-8290.cd-19-0094), 2019-06-13
Supplement: 21598290cd190094-sup-215864_2_supp_5552232_ps91bq.xlsx [file 21598290cd190094-sup-215864_2_supp_5552232_ps91bq.xlsx]

## Sheet: Cluster 1
	Score	Associated.Gene.Name	dbCluster	avgDiff
ENSMUSG00000029819	0.997993	Npy	1	4.98563
ENSMUSG00000002603	0.981532	Tgfb1	1	1.90534
ENSMUSG00000030342	0.977898	Cd9	1	1.83095
ENSMUSG00000046223	0.975692	Plaur	1	1.74912
ENSMUSG00000032076	0.974876	Cadm1	1	1.81315
ENSMUSG00000032420	0.974862	Nt5e	1	1.91542
ENSMUSG00000007888	0.965567	Crlf1	1	1.81632
ENSMUSG00000040584	0.962005	Abcb1a	1	1.51386
ENSMUSG00000054342	0.960735	Kcnn4	1	1.50074
ENSMUSG00000009687	0.958485	Fxyd5	1	1.34485
ENSMUSG00000048376	0.953853	F2r	1	1.70834
ENSMUSG00000041324	0.952514	Inhba	1	2.76281
ENSMUSG00000027333	0.949817	Smox	1	1.4923
ENSMUSG00000020592	0.949085	Sdc1	1	1.53974
ENSMUSG00000027397	0.947508	Slc20a1	1	1.83479
ENSMUSG00000003541	0.94368	Ier3	1	1.5747
ENSMUSG00000037852	0.943487	Cpe	1	1.43173
ENSMUSG00000022010	0.942763	Tsc22d1	1	1.37629
ENSMUSG00000020607	0.94027	Fam84a	1	1.40302
ENSMUSG00000015134	0.931903	Aldh1a3	1	1.87133
ENSMUSG00000034159	0.928094	2310007B03Rik	1	2.05238
ENSMUSG00000024486	0.925343	Hbegf	1	1.61034
ENSMUSG00000022636	0.922848	Alcam	1	1.27298
ENSMUSG00000027358	0.922748	Bmp2	1	1.7119
ENSMUSG00000032473	0.92004	Cldn18	1	1.29988
ENSMUSG00000020644	0.914019	Id2	1	1.62391
ENSMUSG00000026414	0.912874	Tnnt2	1	1.34527
ENSMUSG00000034765	0.911639	Dusp5	1	1.17001
ENSMUSG00000020388	0.90965	Pdlim4	1	1.14359
ENSMUSG00000027199	0.909506	Gatm	1	1.41436
ENSMUSG00000000058	0.906711	Cav2	1	1.0868
ENSMUSG00000029378	0.903041	Areg	1	1.7512
ENSMUSG00000029223	0.902102	Uchl1	1	1.18095
ENSMUSG00000020027	0.902043	Socs2	1	1.2156
ENSMUSG00000025809	0.900427	Itgb1	1	1.00732
ENSMUSG00000019775	0.900173	Rgs17	1	1.08906
ENSMUSG00000005087	0.898615	Cd44	1	1.0143
ENSMUSG00000032356	0.89613	Rasgrf1	1	1.02214
ENSMUSG00000026204	0.894181	Ptprn	1	1.20671
ENSMUSG00000023905	0.893112	Tnfrsf12a	1	1.04286
ENSMUSG00000020427	0.892051	Igfbp3	1	2.01991
ENSMUSG00000029648	0.890744	Flt1	1	1.25385
ENSMUSG00000030560	0.885018	Ctsc	1	1.16324
ENSMUSG00000063229	0.883849	Ldha	1	1.04112
ENSMUSG00000021950	0.88117	Anxa8	1	1.08968
ENSMUSG00000038871	0.875483	Bpgm	1	1.18164
ENSMUSG00000082361	0.869546	Btc	1	1.05117
ENSMUSG00000025161	0.867002	Slc16a3	1	1.10671
ENSMUSG00000028108	0.861652	Ecm1	1	1.10852
ENSMUSG00000027859	0.860766	Ngf	1	1.73931
ENSMUSG00000079852	0.855381	Klra4	1	1.07648
ENSMUSG00000002797	0.848775	Ggct	1	1.26038
ENSMUSG00000023043	0.842273	Krt18	1	1.0071
ENSMUSG00000044258	0.838945	Ctla2a	1	1.03851
ENSMUSG00000027399	0.835178	Il1a	1	1.27457
ENSMUSG00000043165	0.829615	Lor	1	1.16654
ENSMUSG00000022265	0.827698	Ank	1	1.07179
ENSMUSG00000027276	0.825603	Jag1	1	1.04017
ENSMUSG00000021268	0.822493	Meg3	1	1.02235
ENSMUSG00000031604	0.801302	Msmo1	1	1.12011
ENSMUSG00000026360	0.793314	Rgs2	1	1.02322
ENSMUSG00000030167	0.788993	Klrc1	1	1.0995
ENSMUSG00000048776	0.747466	Pthlh	1	1.16947
ENSMUSG00000037411	0.738402	Serpine1	1	1.36352
ENSMUSG00000047562	0.738134	Mmp10	1	1.80055
ENSMUSG00000029304	0.722001	Spp1	1	1.06555
ENSMUSG00000022227	0.660231	Mcpt1	1	1.03179

## Sheet: Cluster 2
	Score	Associated.Gene.Name	dbCluster	avgDiff
ENSMUSG00000019851	0.98008	Perp	2	2.29189
ENSMUSG00000007891	0.964164	Ctsd	2	1.57548
ENSMUSG00000023067	0.961001	Cdkn1a	2	2.22439
ENSMUSG00000041801	0.960269	Phlda3	2	1.42025
ENSMUSG00000037706	0.959638	Cd81	2	1.07028
ENSMUSG00000030342	0.955556	Cd9	2	1.40553
ENSMUSG00000006356	0.949368	Crip2	2	1.64702
ENSMUSG00000021950	0.933638	Anxa8	2	1.51861
ENSMUSG00000054342	0.929641	Kcnn4	2	1.47509
ENSMUSG00000025510	0.928439	Cd151	2	1.00113
ENSMUSG00000003873	0.927308	Bax	2	1.13213
ENSMUSG00000050335	0.925822	Lgals3	2	1.62371
ENSMUSG00000020184	0.924431	Mdm2	2	1.26917
ENSMUSG00000015932	0.923856	Dstn	2	1.02821
ENSMUSG00000020326	0.913986	Ccng1	2	1.41921
ENSMUSG00000027358	0.910396	Bmp2	2	2.22492
ENSMUSG00000036478	0.899041	Btg1	2	1.2167
ENSMUSG00000037573	0.8988	Tob1	2	1.32744
ENSMUSG00000041120	0.897134	Nbl1	2	1.20332
ENSMUSG00000020758	0.895254	Itgb4	2	1.43445
ENSMUSG00000027333	0.890815	Smox	2	1.16838
ENSMUSG00000009687	0.886964	Fxyd5	2	1.01287
ENSMUSG00000002603	0.885768	Tgfb1	2	1.00769
ENSMUSG00000073802	0.880399	Cdkn2b	2	1.11895
ENSMUSG00000031075	0.875537	Ano1	2	1.10577
ENSMUSG00000029378	0.87507	Areg	2	1.99331
ENSMUSG00000001247	0.874512	Lsr	2	1.17096
ENSMUSG00000023043	0.87345	Krt18	2	1.21208
ENSMUSG00000022010	0.869253	Tsc22d1	2	1.09467
ENSMUSG00000003541	0.869171	Ier3	2	1.26995
ENSMUSG00000020592	0.868931	Sdc1	2	1.03595
ENSMUSG00000031841	0.867451	Cdh13	2	1.06197
ENSMUSG00000021701	0.860764	Plk2	2	1.57952
ENSMUSG00000046223	0.856126	Plaur	2	1.03541
ENSMUSG00000024486	0.855504	Hbegf	2	1.31929
ENSMUSG00000027978	0.85275	Prss12	2	1.16019
ENSMUSG00000006360	0.843943	Crip1	2	1.34887
ENSMUSG00000000567	0.836766	Sox9	2	1.09684
ENSMUSG00000004655	0.830216	Aqp1	2	1.26316
ENSMUSG00000020388	0.829964	Pdlim4	2	1.02871
ENSMUSG00000024521	0.828247	Pmaip1	2	1.23042
ENSMUSG00000032076	0.827404	Cadm1	2	1.1805
ENSMUSG00000030208	0.825107	Emp1	2	1.03121
ENSMUSG00000030717	0.823143	Nupr1	2	1.5058
ENSMUSG00000003032	0.814472	Klf4	2	1.05961
ENSMUSG00000014846	0.814239	Tppp3	2	1.42571
ENSMUSG00000020427	0.813916	Igfbp3	2	1.68096
ENSMUSG00000020911	0.799046	Krt19	2	1.42319
ENSMUSG00000032420	0.796744	Nt5e	2	1.05268
ENSMUSG00000026360	0.77161	Rgs2	2	1.3977
ENSMUSG00000019970	0.763568	Sgk1	2	1.12709
ENSMUSG00000045394	0.755176	Epcam	2	1.03803
ENSMUSG00000031734	0.748023	Irx3	2	1.00203
ENSMUSG00000020205	0.742899	Phlda1	2	1.00996
ENSMUSG00000050359	0.698884	Sprr1a	2	2.06731
ENSMUSG00000048776	0.679468	Pthlh	2	1.05788

## Sheet: Cluster 3
	Score	Associated.Gene.Name	dbCluster	avgDiff
ENSMUSG00000044303	0.963913	Cdkn2a	3	1.89366
ENSMUSG00000032294	0.913647	Pkm	3	1.09187
ENSMUSG00000031207	0.89477	Msn	3	1.04254
ENSMUSG00000027500	0.891423	Stmn2	3	1.82822
ENSMUSG00000079852	0.873672	Klra4	3	1.11491
ENSMUSG00000020407	0.873523	Upp1	3	1.22261
ENSMUSG00000056758	0.856271	Hmga2	3	1.27126
ENSMUSG00000002797	0.85446	Ggct	3	1.08944
ENSMUSG00000001020	0.848551	S100a4	3	1.36782
ENSMUSG00000033213	0.848155	AA467197	3	1.28879
ENSMUSG00000049382	0.847845	Krt8	3	1.17412
ENSMUSG00000001435	0.836888	Col18a1	3	1.10734
ENSMUSG00000023905	0.828754	Tnfrsf12a	3	1.01075
ENSMUSG00000073802	0.802138	Cdkn2b	3	1.11817
ENSMUSG00000023043	0.801516	Krt18	3	1.02685
ENSMUSG00000028108	0.797897	Ecm1	3	1.14991
ENSMUSG00000024486	0.781562	Hbegf	3	1.15
ENSMUSG00000020592	0.776689	Sdc1	3	1.00778
ENSMUSG00000024803	0.752616	Ankrd1	3	1.19739
ENSMUSG00000022055	0.716962	Nefl	3	1.20634
ENSMUSG00000032291	0.637921	Crabp1	3	1.61726

## Sheet: Cluster 4
	Score	Associated.Gene.Name	dbCluster	avgDiff
ENSMUSG00000046727	0.950179	Cystm1	4	2.04884
ENSMUSG00000022037	0.936851	Clu	4	2.46423
ENSMUSG00000017723	0.928302	Wfdc2	4	2.21408
ENSMUSG00000004552	0.916287	Ctse	4	2.17755
ENSMUSG00000030587	0.913567	2200002D01Rik	4	1.57039
ENSMUSG00000074227	0.903959	Spint2	4	1.52259
ENSMUSG00000027801	0.903678	Tm4sf4	4	2.31219
ENSMUSG00000025068	0.891021	Gsto1	4	1.55584
ENSMUSG00000031584	0.871084	Gsr	4	1.27786
ENSMUSG00000029994	0.865702	Anxa4	4	1.14974
ENSMUSG00000047139	0.851628	Cd24a	4	1.34066
ENSMUSG00000029304	0.848967	Spp1	4	1.57193
ENSMUSG00000034127	0.848037	Tspan8	4	1.29276
ENSMUSG00000029322	0.836035	Plac8	4	1.06075
ENSMUSG00000001025	0.818884	S100a6	4	1.13885
ENSMUSG00000023043	0.810785	Krt18	4	1.06568
ENSMUSG00000042784	0.810044	Muc1	4	1.32172
ENSMUSG00000035775	0.805218	Krt20	4	1.2197
ENSMUSG00000031635	0.80116	Anxa10	4	1.20835
ENSMUSG00000032348	0.800284	Gsta4	4	1.84268
ENSMUSG00000045991	0.800172	Onecut2	4	1.55084
ENSMUSG00000031430	0.796886	Vsig1	4	1.07071
ENSMUSG00000024990	0.788778	Rbp4	4	1.29028
ENSMUSG00000029153	0.788594	Ociad2	4	1.04884
ENSMUSG00000043501	0.785285	Lgals2	4	2.08307
ENSMUSG00000020911	0.768777	Krt19	4	1.17525
ENSMUSG00000047230	0.7646	Cldn2	4	1.11469
ENSMUSG00000053398	0.760581	Phgdh	4	1.01337
ENSMUSG00000026576	0.74432	Atp1b1	4	1.27693
ENSMUSG00000057092	0.743727	Fxyd3	4	1.36132
ENSMUSG00000023039	0.728805	Krt7	4	1.3993
ENSMUSG00000050359	0.688928	Sprr1a	4	1.23106
ENSMUSG00000053964	0.683274	Lgals4	4	1.23092
ENSMUSG00000074183	0.683122	Gsta1	4	1.28066
ENSMUSG00000024032	0.665518	Tff1	4	2.91463
ENSMUSG00000061808	0.626934	Ttr	4	1.2411
ENSMUSG00000024028	0.617767	Tff2	4	1.42082
ENSMUSG00000063779	0.526136	Chil4	4	1.0201

## Sheet: Cluster 5
	Score	Associated.Gene.Name	dbCluster	avgDiff
ENSMUSG00000017969	0.954341	Ptgis	5	1.74464
ENSMUSG00000017002	0.931858	Slpi	5	3.90089
ENSMUSG00000027574	0.91891	Nkain4	5	1.69828
ENSMUSG00000022665	0.888854	Ccdc80	5	1.32844
ENSMUSG00000004951	0.885567	Hspb1	5	1.50143
ENSMUSG00000053522	0.884974	Lgals7	5	1.78661
ENSMUSG00000016458	0.884647	Wt1	5	1.05835
ENSMUSG00000020733	0.884476	Slc9a3r1	5	1.22344
ENSMUSG00000040016	0.871447	Ptger3	5	1.16544
ENSMUSG00000086320	0.867945	Gm12840	5	1.12583
ENSMUSG00000030246	0.863513	Ldhb	5	1.11854
ENSMUSG00000032271	0.862365	Nnmt	5	1.00763
ENSMUSG00000020044	0.858163	Timp3	5	1.173
ENSMUSG00000060962	0.851406	Dmkn	5	1.49194
ENSMUSG00000030218	0.846324	Mgp	5	1.28544
ENSMUSG00000040026	0.832774	Saa3	5	3.30743
ENSMUSG00000032060	0.83118	Cryab	5	1.13064
ENSMUSG00000022132	0.80952	Cldn10	5	1.01176
ENSMUSG00000024610	0.790194	Cd74	5	2.41245
ENSMUSG00000042985	0.78742	Upk3b	5	1.83874
ENSMUSG00000073421	0.78538	H2-Ab1	5	1.56902
ENSMUSG00000020186	0.778508	Csrp2	5	1.02777
ENSMUSG00000049436	0.764197	Upk1b	5	1.4473
ENSMUSG00000060586	0.706066	H2-Eb1	5	1.28359
ENSMUSG00000036594	0.68885	H2-Aa	5	1.13907
ENSMUSG00000030669	0.673751	Calca	5	1.38346
ENSMUSG00000022425	0.647853	Enpp2	5	1.23708
ENSMUSG00000062345	0.601906	Serpinb2	5	1.44044
ENSMUSG00000028989	0.592889	Angptl7	5	1.25724
ENSMUSG00000023078	0.550519	Cxcl13	5	1.10859
ENSMUSG00000044258	0.542163	Ctla2a	5	1.50705

## Sheet: Cluster 6
	Score	Associated.Gene.Name	dbCluster	avgDiff
ENSMUSG00000030116	0.954894	Mfap5	6	2.54731
ENSMUSG00000023224	0.94291	Serping1	6	2.01069
ENSMUSG00000000753	0.940097	Serpinf1	6	1.86089
ENSMUSG00000026043	0.932773	Col3a1	6	1.93076
ENSMUSG00000032334	0.928978	Loxl1	6	1.45142
ENSMUSG00000027204	0.922934	Fbn1	6	1.79982
ENSMUSG00000036446	0.922629	Lum	6	1.9841
ENSMUSG00000029661	0.919779	Col1a2	6	1.79023
ENSMUSG00000031740	0.910724	Mmp2	6	1.573
ENSMUSG00000001506	0.905651	Col1a1	6	1.85164
ENSMUSG00000022816	0.905057	Fstl1	6	1.36269
ENSMUSG00000020473	0.902952	Aebp1	6	1.45512
ENSMUSG00000018339	0.897893	Gpx3	6	1.65048
ENSMUSG00000019929	0.897655	Dcn	6	1.67642
ENSMUSG00000060703	0.897235	Cd302	6	1.30624
ENSMUSG00000060572	0.896418	Mfap2	6	1.5417
ENSMUSG00000036545	0.892227	Adamts2	6	1.29997
ENSMUSG00000037206	0.887558	Islr	6	1.35045
ENSMUSG00000036570	0.880056	Fxyd1	6	1.20539
ENSMUSG00000026574	0.879136	Dpt	6	2.2187
ENSMUSG00000020810	0.876113	Cygb	6	1.23113
ENSMUSG00000029096	0.875772	Htra3	6	1.63607
ENSMUSG00000026042	0.874106	Col5a2	6	1.24197
ENSMUSG00000009281	0.874089	Rarres2	6	1.2371
ENSMUSG00000073889	0.868806	Il11ra1	6	1.37601
ENSMUSG00000028111	0.867914	Ctsk	6	1.31177
ENSMUSG00000029061	0.863412	Mmp23	6	1.08688
ENSMUSG00000031375	0.860517	Bgn	6	1.29118
ENSMUSG00000072941	0.860515	Sod3	6	1.30515
ENSMUSG00000026879	0.857181	Gsn	6	2.09774
ENSMUSG00000038521	0.853145	C1s1	6	1.11835
ENSMUSG00000020053	0.852806	Igf1	6	1.7257
ENSMUSG00000022371	0.852307	Col14a1	6	1.8775
ENSMUSG00000019539	0.851315	Rcn3	6	1.14664
ENSMUSG00000031548	0.844302	Sfrp1	6	1.88609
ENSMUSG00000026837	0.842346	Col5a1	6	1.11052
ENSMUSG00000027848	0.84093	Olfml3	6	1.34031
ENSMUSG00000027750	0.839139	Postn	6	1.29887
ENSMUSG00000023046	0.837777	Igfbp6	6	1.11181
ENSMUSG00000019278	0.837528	Dpep1	6	1.52698
ENSMUSG00000015568	0.833778	Lpl	6	1.32784
ENSMUSG00000027408	0.833	Cpxm1	6	1.4691
ENSMUSG00000024529	0.832038	Lox	6	1.11471
ENSMUSG00000055172	0.831339	C1ra	6	1.14912
ENSMUSG00000005397	0.829949	Nid1	6	1.13097
ENSMUSG00000018819	0.829881	Lsp1	6	1.18533
ENSMUSG00000015085	0.829151	Entpd2	6	1.17313
ENSMUSG00000006369	0.827629	Fbln1	6	1.22548
ENSMUSG00000073418	0.827011	C4b	6	1.61956
ENSMUSG00000090084	0.824789	Srpx	6	1.20884
ENSMUSG00000028369	0.824025	Svep1	6	1.47349
ENSMUSG00000027074	0.823546	Slc43a3	6	1.07878
ENSMUSG00000024011	0.823354	Pi16	6	2.29424
ENSMUSG00000075602	0.822793	Ly6a	6	1.60416
ENSMUSG00000024164	0.821851	C3	6	1.64198
ENSMUSG00000016024	0.817151	Lbp	6	1.21069
ENSMUSG00000079018	0.815159	Ly6c1	6	1.94003
ENSMUSG00000025784	0.809098	Clec3b	6	2.34355
ENSMUSG00000064373	0.802527	Sepp1	6	1.0412
ENSMUSG00000056481	0.800618	Cd248	6	1.0272
ENSMUSG00000033327	0.796839	Tnxb	6	1.43352
ENSMUSG00000027996	0.794908	Sfrp2	6	1.89547
ENSMUSG00000039405	0.791494	Prss23	6	1.40882
ENSMUSG00000021390	0.789246	Ogn	6	1.57386
ENSMUSG00000002847	0.786369	Pla1a	6	1.21667
ENSMUSG00000042436	0.784759	Mfap4	6	1.81736
ENSMUSG00000031239	0.770738	Itm2a	6	1.74876
ENSMUSG00000031380	0.76742	Figf	6	1.60707
ENSMUSG00000021091	0.766754	Serpina3n	6	1.07363
ENSMUSG00000035258	0.764822	Abi3bp	6	1.12676
ENSMUSG00000028339	0.764304	Col15a1	6	1.20517
ENSMUSG00000054203	0.76158	Ifi205	6	1.19814
ENSMUSG00000028517	0.757675	Plpp3	6	1.08357
ENSMUSG00000079017	0.75471	Ifi27l2a	6	1.6467
ENSMUSG00000034463	0.754694	Scara3	6	1.04531
ENSMUSG00000053475	0.75206	Tnfaip6	6	1.49343
ENSMUSG00000022894	0.74767	Adamts5	6	1.21977
ENSMUSG00000020467	0.743359	Efemp1	6	1.45164
ENSMUSG00000003665	0.74212	Has1	6	1.5509
ENSMUSG00000027832	0.741959	Ptx3	6	1.9497
ENSMUSG00000020676	0.740914	Ccl11	6	1.26687
ENSMUSG00000029675	0.739931	Eln	6	1.28674
ENSMUSG00000031722	0.737293	Hp	6	1.61036
ENSMUSG00000002985	0.734823	Apoe	6	1.1182
ENSMUSG00000014846	0.728508	Tppp3	6	1.15897
ENSMUSG00000053113	0.727548	Socs3	6	1.01759
ENSMUSG00000029380	0.726566	Cxcl1	6	1.44982
ENSMUSG00000035373	0.722271	Ccl7	6	1.54722
ENSMUSG00000045573	0.720425	Penk	6	1.2976
ENSMUSG00000098178	0.717986	Gm42418	6	1.29598
ENSMUSG00000037664	0.712666	Cdkn1c	6	1.06093
ENSMUSG00000042254	0.708857	Cilp	6	1.59845
ENSMUSG00000021319	0.698154	Sfrp4	6	1.51668
ENSMUSG00000025746	0.687608	Il6	6	1.21011
ENSMUSG00000030790	0.685887	Adm	6	1.20674
ENSMUSG00000061353	0.6812	Cxcl12	6	1.15509
ENSMUSG00000054196	0.649904	Cthrc1	6	1.06534
ENSMUSG00000043613	0.632735	Mmp3	6	1.45968

## Sheet: Cluster 7
	Score	Associated.Gene.Name	dbCluster	avgDiff
ENSMUSG00000027559	0.977389	Car3	7	4.29304
ENSMUSG00000037095	0.97388	Lrg1	7	3.46075
ENSMUSG00000002985	0.973543	Apoe	7	2.66543
ENSMUSG00000023367	0.965863	Tmem176a	7	2.14553
ENSMUSG00000008540	0.964493	Mgst1	7	1.92542
ENSMUSG00000029810	0.963137	Tmem176b	7	1.86316
ENSMUSG00000061780	0.956179	Cfd	7	5.13592
ENSMUSG00000073411	0.952798	H2-D1	7	1.65211
ENSMUSG00000030077	0.948211	Chl1	7	1.77447
ENSMUSG00000073418	0.946088	C4b	7	1.7947
ENSMUSG00000009281	0.943078	Rarres2	7	1.68411
ENSMUSG00000061232	0.939808	H2-K1	7	1.42375
ENSMUSG00000031765	0.932875	Mt1	7	2.15546
ENSMUSG00000039956	0.926904	Mrap	7	2.04837
ENSMUSG00000031762	0.920756	Mt2	7	2.30848
ENSMUSG00000020077	0.910241	Srgn	7	1.7308
ENSMUSG00000031722	0.899869	Hp	7	2.69824
ENSMUSG00000026365	0.895401	Cfh	7	1.31968
ENSMUSG00000001918	0.89468	Slc1a5	7	1.12459
ENSMUSG00000021922	0.890005	Itih4	7	2.47275
ENSMUSG00000062515	0.889484	Fabp4	7	2.2574
ENSMUSG00000002944	0.886417	Cd36	7	1.63625
ENSMUSG00000055737	0.880889	Ghr	7	1.58838
ENSMUSG00000015568	0.880086	Lpl	7	1.51352
ENSMUSG00000003617	0.878902	Cp	7	1.15222
ENSMUSG00000020053	0.878395	Igf1	7	1.20365
ENSMUSG00000026473	0.878099	Glul	7	1.21438
ENSMUSG00000060002	0.873048	Chpt1	7	1.08012
ENSMUSG00000021091	0.865852	Serpina3n	7	1.18467
ENSMUSG00000032554	0.864676	Trf	7	1.68225
ENSMUSG00000018339	0.861917	Gpx3	7	1.53583
ENSMUSG00000031451	0.861464	Gas6	7	1.76401
ENSMUSG00000026385	0.860004	Dbi	7	1.26462
ENSMUSG00000024087	0.847051	Cyp1b1	7	1.30103
ENSMUSG00000017344	0.838587	Vtn	7	1.34983
ENSMUSG00000027962	0.835165	Vcam1	7	1.25315
ENSMUSG00000025509	0.828447	Pnpla2	7	1.40818
ENSMUSG00000028207	0.827578	Asph	7	1.21562
ENSMUSG00000054619	0.823264	Mettl7a1	7	1.06324
ENSMUSG00000040564	0.820952	Apoc1	7	2.53381
ENSMUSG00000024892	0.812508	Pcx	7	1.013
ENSMUSG00000023078	0.808846	Cxcl13	7	1.61929
ENSMUSG00000022878	0.80376	Adipoq	7	2.37708
ENSMUSG00000092341	0.800049	Malat1	7	1.15678
ENSMUSG00000057729	0.791759	Prtn3	7	1.68182
ENSMUSG00000064351	0.789513	mt-Co1	7	1.14779
ENSMUSG00000002588	0.782609	Pon1	7	1.88975
ENSMUSG00000039196	0.782205	Orm1	7	1.08643
ENSMUSG00000061353	0.78076	Cxcl12	7	1.02399
ENSMUSG00000072941	0.780361	Sod3	7	1.0365
ENSMUSG00000021508	0.778008	Cxcl14	7	1.63524
ENSMUSG00000020377	0.774149	Ltc4s	7	1.47216
ENSMUSG00000079012	0.773822	Serpina3m	7	1.23829
ENSMUSG00000002289	0.770017	Angptl4	7	1.14677
ENSMUSG00000002831	0.760212	Plin4	7	1.10026
ENSMUSG00000022018	0.754287	Rgcc	7	1.05607
ENSMUSG00000040026	0.748347	Saa3	7	1.38521
ENSMUSG00000025479	0.723979	Cyp2e1	7	1.6032
ENSMUSG00000030278	0.71456	Cidec	7	1.17151
ENSMUSG00000051748	0.714182	Wfdc21	7	1.50456
ENSMUSG00000074115	0.714039	Saa1	7	2.1548
ENSMUSG00000031980	0.70514	Agt	7	1.0833
ENSMUSG00000049422	0.679324	Chchd10	7	1.23503
ENSMUSG00000037071	0.602423	Scd1	7	1.17343
ENSMUSG00000012705	0.54176	Retn	7	1.50233

## Sheet: Cluster 8
	Score	Associated.Gene.Name	dbCluster	avgDiff
ENSMUSG00000026678	0.990379	Rgs5	8	4.23201
ENSMUSG00000040280	0.985332	Ndufa4l2	8	2.58914
ENSMUSG00000030605	0.975016	Mfge8	8	1.75997
ENSMUSG00000029309	0.971908	Sparcl1	8	2.43376
ENSMUSG00000026208	0.969764	Des	8	2.12587
ENSMUSG00000001946	0.966079	Esam	8	1.79613
ENSMUSG00000020928	0.96385	Higd1b	8	2.55972
ENSMUSG00000087006	0.959524	Gm13889	8	2.20089
ENSMUSG00000020486	0.953974	Sept4	8	1.91239
ENSMUSG00000009876	0.950857	Cox4i2	8	2.02402
ENSMUSG00000032766	0.949506	Gng11	8	1.68253
ENSMUSG00000024620	0.945868	Pdgfrb	8	1.52512
ENSMUSG00000026249	0.944899	Serpine2	8	2.09731
ENSMUSG00000059895	0.94278	Ptp4a3	8	2.14422
ENSMUSG00000031503	0.942141	Col4a2	8	1.54898
ENSMUSG00000036256	0.939169	Igfbp7	8	1.3378
ENSMUSG00000021388	0.932627	Aspn	8	1.7216
ENSMUSG00000031502	0.928433	Col4a1	8	1.53912
ENSMUSG00000034164	0.919111	Emid1	8	1.53429
ENSMUSG00000037166	0.915045	Ppp1r14a	8	1.70219
ENSMUSG00000032011	0.914725	Thy1	8	1.58354
ENSMUSG00000030220	0.913827	Arhgdib	8	1.69199
ENSMUSG00000025856	0.913074	Pdgfa	8	1.27558
ENSMUSG00000057098	0.91021	Ebf1	8	1.34277
ENSMUSG00000032135	0.908073	Mcam	8	1.54868
ENSMUSG00000038146	0.907186	Notch3	8	1.42707
ENSMUSG00000028005	0.906956	Gucy1b3	8	1.45317
ENSMUSG00000050234	0.904791	Gja4	8	1.95379
ENSMUSG00000029761	0.904195	Cald1	8	1.01987
ENSMUSG00000041329	0.903797	Atp1b2	8	1.36355
ENSMUSG00000030249	0.902846	Abcc9	8	1.61783
ENSMUSG00000034520	0.900498	Gjc1	8	1.46146
ENSMUSG00000050666	0.897666	Vstm4	8	1.42105
ENSMUSG00000022836	0.896898	Mylk	8	1.54185
ENSMUSG00000067818	0.896556	Myl9	8	2.37511
ENSMUSG00000030247	0.895111	Kcnj8	8	2.11505
ENSMUSG00000001435	0.894524	Col18a1	8	1.25971
ENSMUSG00000035783	0.890257	Acta2	8	2.40923
ENSMUSG00000018417	0.889603	Myo1b	8	1.24358
ENSMUSG00000032946	0.884241	Rasgrp2	8	1.49431
ENSMUSG00000024140	0.88319	Epas1	8	1.20821
ENSMUSG00000022122	0.872804	Ednrb	8	2.04714
ENSMUSG00000006356	0.86841	Crip2	8	1.07946
ENSMUSG00000007872	0.853381	Id3	8	1.21817
ENSMUSG00000038530	0.852867	Rgs4	8	1.37372
ENSMUSG00000020205	0.851728	Phlda1	8	1.10056
ENSMUSG00000026421	0.849903	Csrp1	8	1.23895
ENSMUSG00000020810	0.848366	Cygb	8	1.08223
ENSMUSG00000019326	0.847455	Aoc3	8	1.11073
ENSMUSG00000042284	0.844535	Itga1	8	1.14058
ENSMUSG00000033910	0.839223	Gucy1a3	8	1.11683
ENSMUSG00000086507	0.829487	Adap2os	8	1.15926
ENSMUSG00000030551	0.826436	Nr2f2	8	1.04979
ENSMUSG00000005583	0.826219	Mef2c	8	1.02936
ENSMUSG00000027750	0.822867	Postn	8	1.14734
ENSMUSG00000025491	0.813059	Ifitm1	8	1.52283
ENSMUSG00000028464	0.805511	Tpm2	8	1.04537
ENSMUSG00000090698	0.803341	Apold1	8	1.1236
ENSMUSG00000000184	0.803242	Ccnd2	8	1.05482
ENSMUSG00000049115	0.803156	Agtr1a	8	1.10326
ENSMUSG00000032085	0.793617	Tagln	8	1.69193
ENSMUSG00000026475	0.791053	Rgs16	8	1.21261
ENSMUSG00000017344	0.788598	Vtn	8	1.21456
ENSMUSG00000027533	0.787393	Fabp5	8	1.29096
ENSMUSG00000009681	0.786808	Bcr	8	1.00223
ENSMUSG00000062515	0.779172	Fabp4	8	2.34095
ENSMUSG00000023915	0.77802	Tnfrsf21	8	1.01913
ENSMUSG00000028713	0.762474	Cyp4b1	8	1.29137
ENSMUSG00000028776	0.731768	Tinagl1	8	1.13526
ENSMUSG00000031880	0.723912	Rrad	8	1.14294
ENSMUSG00000059430	0.713637	Actg2	8	1.55405
ENSMUSG00000023064	0.6913	Sncg	8	1.05526

## Sheet: Cluster 9
	Score	Associated.Gene.Name	dbCluster	avgDiff
ENSMUSG00000056071	0.999738	S100a9	9	5.50646
ENSMUSG00000056054	0.999635	S100a8	9	5.92074
ENSMUSG00000030579	0.998086	Tyrobp	9	3.32341
ENSMUSG00000058715	0.996591	Fcer1g	9	2.73799
ENSMUSG00000020077	0.992366	Srgn	9	2.93435
ENSMUSG00000026073	0.982067	Il1r2	9	3.37907
ENSMUSG00000000682	0.981442	Cd52	9	3.15971
ENSMUSG00000033220	0.966751	Rac2	9	2.77236
ENSMUSG00000027398	0.965801	Il1b	9	3.97396
ENSMUSG00000030707	0.965645	Coro1a	9	2.61776
ENSMUSG00000009633	0.96055	G0s2	9	3.57267
ENSMUSG00000021998	0.950202	Lcp1	9	2.66291
ENSMUSG00000030403	0.948637	Vasp	9	1.43163
ENSMUSG00000022378	0.945466	Fam49b	9	1.99541
ENSMUSG00000031584	0.943855	Gsr	9	1.71861
ENSMUSG00000009687	0.941267	Fxyd5	9	1.59259
ENSMUSG00000015950	0.934268	Ncf1	9	2.20938
ENSMUSG00000062593	0.934219	Lilrb4a	9	2.35132
ENSMUSG00000089929	0.932905	Bcl2a1b	9	2.25728
ENSMUSG00000017737	0.932084	Mmp9	9	2.83183
ENSMUSG00000026981	0.923478	Il1rn	9	2.50517
ENSMUSG00000028843	0.919832	Sh3bgrl3	9	1.0413
ENSMUSG00000059498	0.913876	Fcgr3	9	2.038
ENSMUSG00000069516	0.912649	Lyz2	9	3.33321
ENSMUSG00000024014	0.91158	Pim1	9	2.42604
ENSMUSG00000058427	0.902939	Cxcl2	9	3.9434
ENSMUSG00000047798	0.902561	Cd300lf	9	1.77745
ENSMUSG00000002111	0.901505	Spi1	9	2.00986
ENSMUSG00000040747	0.900423	Cd53	9	2.11122
ENSMUSG00000023067	0.897739	Cdkn1a	9	2.16853
ENSMUSG00000046516	0.8929	Cox17	9	1.46644
ENSMUSG00000031827	0.870615	Cotl1	9	1.48016
ENSMUSG00000026395	0.869619	Ptprc	9	1.64007
ENSMUSG00000022876	0.869255	Samsn1	9	2.0269
ENSMUSG00000023349	0.868955	Clec4n	9	2.64059
ENSMUSG00000006519	0.868632	Cyba	9	1.30644
ENSMUSG00000020120	0.868461	Plek	9	2.04873
ENSMUSG00000028581	0.867874	Laptm5	9	1.87343
ENSMUSG00000056501	0.866277	Cebpb	9	1.88367
ENSMUSG00000073412	0.865848	Lst1	9	1.75763
ENSMUSG00000026701	0.860885	Prdx6	9	1.12369
ENSMUSG00000047139	0.858569	Cd24a	9	1.57441
ENSMUSG00000046245	0.857218	Pilra	9	1.88515
ENSMUSG00000042265	0.854229	Trem1	9	1.72063
ENSMUSG00000000290	0.852161	Itgb2	9	1.76506
ENSMUSG00000060791	0.851988	Gmfg	9	1.70812
ENSMUSG00000038811	0.846975	Gngt2	9	1.5693
ENSMUSG00000030220	0.842348	Arhgdib	9	1.82434
ENSMUSG00000024953	0.841752	Prdx5	9	1.08315
ENSMUSG00000039013	0.83828	Siglecf	9	1.65138
ENSMUSG00000024725	0.838049	Ostf1	9	1.29215
ENSMUSG00000102037	0.837297	Bcl2a1a	9	1.94733
ENSMUSG00000034786	0.836245	Gpsm3	9	1.45631
ENSMUSG00000020101	0.835831	Vsir	9	1.51205
ENSMUSG00000036478	0.834735	Btg1	9	1.20301
ENSMUSG00000028249	0.832146	Sdcbp	9	1.20106
ENSMUSG00000020423	0.830029	Btg2	9	1.22861
ENSMUSG00000033192	0.826745	Lpcat2	9	1.60668
ENSMUSG00000025503	0.822812	Taldo1	9	1.22627
ENSMUSG00000031722	0.822676	Hp	9	1.29124
ENSMUSG00000089672	0.820847	Lilr4b	9	1.6835
ENSMUSG00000020377	0.816447	Ltc4s	9	1.671
ENSMUSG00000059326	0.815529	Csf2ra	9	1.58478
ENSMUSG00000022270	0.812521	Fam134b	9	1.39179
ENSMUSG00000075705	0.810248	Msrb1	9	1.31586
ENSMUSG00000021069	0.807489	Pygl	9	1.39982
ENSMUSG00000024300	0.805764	Myo1f	9	1.34126
ENSMUSG00000071713	0.803303	Csf2rb	9	1.55103
ENSMUSG00000048163	0.801362	Selplg	9	1.36721
ENSMUSG00000004266	0.800659	Ptpn6	9	1.45833
ENSMUSG00000043953	0.791388	Ccrl2	9	2.86265
ENSMUSG00000030474	0.789798	Siglece	9	1.37716
ENSMUSG00000030142	0.789525	Clec4e	9	1.73458
ENSMUSG00000013974	0.789314	Mcemp1	9	1.73004
ENSMUSG00000025804	0.788788	Ccr1	9	1.87884
ENSMUSG00000020407	0.787757	Upp1	9	1.46672
ENSMUSG00000031662	0.786644	Snx20	9	1.31874
ENSMUSG00000033213	0.782838	AA467197	9	1.33563
ENSMUSG00000042228	0.779439	Lyn	9	1.40125
ENSMUSG00000051439	0.779209	Cd14	9	2.68382
ENSMUSG00000020484	0.778937	Xbp1	9	1.15975
ENSMUSG00000038612	0.775318	Mcl1	9	1.19748
ENSMUSG00000026180	0.773628	Cxcr2	9	1.38926
ENSMUSG00000028874	0.773555	Fgr	9	1.15931
ENSMUSG00000053338	0.773385	Tarm1	9	1.58661
ENSMUSG00000003484	0.773191	Cyp4f18	9	1.50448
ENSMUSG00000099974	0.772917	Bcl2a1d	9	1.18077
ENSMUSG00000022831	0.772393	Hcls1	9	1.33162
ENSMUSG00000071715	0.77231	Ncf4	9	1.39349
ENSMUSG00000042659	0.771795	Arrdc4	9	1.08938
ENSMUSG00000060216	0.770976	Arrb2	9	1.21683
ENSMUSG00000060063	0.767091	Alox5ap	9	1.78433
ENSMUSG00000001156	0.764916	Mxd1	9	1.41311
ENSMUSG00000052435	0.757806	Cebpe	9	1.39954
ENSMUSG00000052212	0.757679	Cd177	9	1.85643
ENSMUSG00000000805	0.757311	Car4	9	2.79242
ENSMUSG00000044811	0.756764	AF251705	9	1.12855
ENSMUSG00000052270	0.756464	Fpr2	9	1.23535
ENSMUSG00000004609	0.755301	Cd33	9	1.41818
ENSMUSG00000026158	0.749786	Ogfrl1	9	1.53944
ENSMUSG00000021457	0.749767	Syk	9	1.16959
ENSMUSG00000006731	0.74908	B4galnt1	9	1.22061
ENSMUSG00000004880	0.74905	Lbr	9	1.05262
ENSMUSG00000051314	0.741552	Ffar2	9	1.14766
ENSMUSG00000029915	0.741252	Clec5a	9	1.37235
ENSMUSG00000050075	0.741077	Gpr171	9	1.45157
ENSMUSG00000030786	0.740823	Itgam	9	1.27404
ENSMUSG00000049130	0.740542	C5ar1	9	1.67487
ENSMUSG00000028859	0.740511	Csf3r	9	1.24742
ENSMUSG00000098112	0.740507	Bin2	9	1.10225
ENSMUSG00000035711	0.738946	Dok3	9	1.18803
ENSMUSG00000032434	0.732054	Cmtm6	9	1.07951
ENSMUSG00000024856	0.729139	Cdk2ap2	9	1.01289
ENSMUSG00000018381	0.727297	Abi3	9	1.02194
ENSMUSG00000028525	0.72398	Pde4b	9	1.2914
ENSMUSG00000066682	0.723419	Pilrb2	9	1.32614
ENSMUSG00000048534	0.723043	Amica1	9	1.0921
ENSMUSG00000021665	0.722428	Hexb	9	1.21415
ENSMUSG00000036931	0.719015	Nfkbid	9	1.15245
ENSMUSG00000024590	0.717224	Lmnb1	9	1.40414
ENSMUSG00000026480	0.71557	Ncf2	9	1.11862
ENSMUSG00000034765	0.709993	Dusp5	9	1.20014
ENSMUSG00000035004	0.708963	Igsf6	9	1.02602
ENSMUSG00000032691	0.708508	Nlrp3	9	1.43794
ENSMUSG00000045502	0.707881	Hcar2	9	1.42649
ENSMUSG00000009772	0.703802	Nuak2	9	1.15967
ENSMUSG00000001128	0.702309	Cfp	9	1.18492
ENSMUSG00000027737	0.702153	Slc7a11	9	1.19164
ENSMUSG00000025701	0.700773	Alox5	9	1.12127
ENSMUSG00000031504	0.698913	Rab20	9	1.07481
ENSMUSG00000026360	0.697652	Rgs2	9	1.0433
ENSMUSG00000029580	0.696631	Actb	9	1.14094
ENSMUSG00000022018	0.695356	Rgcc	9	1.29766
ENSMUSG00000041836	0.69465	Ptpre	9	1.03979
ENSMUSG00000057135	0.693216	Scimp	9	1.01119
ENSMUSG00000034652	0.692764	Cd300a	9	1.08426
ENSMUSG00000027399	0.686311	Il1a	9	2.10274
ENSMUSG00000026107	0.684881	Nabp1	9	1.09071
ENSMUSG00000030413	0.68046	Pglyrp1	9	1.59305
ENSMUSG00000026094	0.680247	Stk17b	9	1.14248
ENSMUSG00000057729	0.677993	Prtn3	9	1.23683
ENSMUSG00000000982	0.676006	Ccl3	9	2.35602
ENSMUSG00000015312	0.67572	Gadd45b	9	1.17569
ENSMUSG00000018927	0.672018	Ccl6	9	3.15728
ENSMUSG00000022540	0.668264	Rogdi	9	1.10304
ENSMUSG00000072620	0.667992	Slfn2	9	1.1348
ENSMUSG00000063234	0.660187	Gpr84	9	1.06657
ENSMUSG00000030144	0.659817	Clec4d	9	1.09934
ENSMUSG00000021831	0.635106	Ero1l	9	1.08036
ENSMUSG00000018930	0.627578	Ccl4	9	1.52111
ENSMUSG00000018796	0.626991	Acsl1	9	1.06094
ENSMUSG00000051748	0.626087	Wfdc21	9	1.89375
ENSMUSG00000046223	0.621312	Plaur	9	1.28478
ENSMUSG00000079597	0.612493	Gm5483	9	3.16962
ENSMUSG00000078122	0.612489	F630028O10Rik	9	1.29893
ENSMUSG00000056529	0.611509	Ptafr	9	1.03401
ENSMUSG00000054169	0.596628	Ceacam10	9	1.18191
ENSMUSG00000045551	0.596624	Fpr1	9	1.01395
ENSMUSG00000022651	0.595532	Retnlg	9	2.30012
ENSMUSG00000025383	0.563534	Il23a	9	1.09965
ENSMUSG00000026822	0.555066	Lcn2	9	1.34468
ENSMUSG00000095620	0.547426	2010005H15Rik	9	1.64426
ENSMUSG00000044103	0.531869	Il1f9	9	1.08861
ENSMUSG00000029379	0.503253	Cxcl3	9	1.70096

## Sheet: Cluster 10
	Score	Associated.Gene.Name	dbCluster	avgDiff
ENSMUSG00000058715	0.998577	Fcer1g	10	3.3205
ENSMUSG00000059498	0.998326	Fcgr3	10	2.6886
ENSMUSG00000028581	0.998285	Laptm5	10	2.26382
ENSMUSG00000030579	0.998082	Tyrobp	10	3.40039
ENSMUSG00000038642	0.981305	Ctss	10	3.74582
ENSMUSG00000001128	0.980453	Cfp	10	2.65298
ENSMUSG00000018927	0.980272	Ccl6	10	3.7962
ENSMUSG00000069516	0.979585	Lyz2	10	5.19988
ENSMUSG00000031838	0.973296	Ifi30	10	1.93783
ENSMUSG00000020077	0.969222	Srgn	10	2.92864
ENSMUSG00000000682	0.95979	Cd52	10	2.92624
ENSMUSG00000030560	0.958447	Ctsc	10	2.12492
ENSMUSG00000006519	0.954287	Cyba	10	1.52377
ENSMUSG00000050708	0.951201	Ftl1	10	1.3634
ENSMUSG00000040747	0.944142	Cd53	10	1.95684
ENSMUSG00000060063	0.941668	Alox5ap	10	2.20335
ENSMUSG00000069792	0.941413	Wfdc17	10	3.33529
ENSMUSG00000031827	0.935648	Cotl1	10	1.55263
ENSMUSG00000004207	0.935443	Psap	10	1.28356
ENSMUSG00000024610	0.92726	Cd74	10	3.8555
ENSMUSG00000002111	0.923577	Spi1	10	1.83339
ENSMUSG00000089929	0.923228	Bcl2a1b	10	2.06229
ENSMUSG00000002985	0.923219	Apoe	10	3.64416
ENSMUSG00000073411	0.923145	H2-D1	10	1.36267
ENSMUSG00000037649	0.919414	H2-DMa	10	1.85883
ENSMUSG00000028249	0.917627	Sdcbp	10	1.0078
ENSMUSG00000026656	0.905742	Fcgr2b	10	2.30489
ENSMUSG00000021998	0.903528	Lcp1	10	1.86709
ENSMUSG00000033220	0.902754	Rac2	10	1.54338
ENSMUSG00000036908	0.902499	Unc93b1	10	1.67731
ENSMUSG00000019987	0.902257	Arg1	10	3.176
ENSMUSG00000027447	0.900911	Cst3	10	1.51146
ENSMUSG00000024621	0.900802	Csf1r	10	1.76777
ENSMUSG00000030844	0.8976	Rgs10	10	1.44044
ENSMUSG00000000594	0.897437	Gm2a	10	1.50547
ENSMUSG00000016256	0.889708	Ctsz	10	1.21281
ENSMUSG00000036905	0.888178	C1qb	10	3.64763
ENSMUSG00000073421	0.886995	H2-Ab1	10	3.39588
ENSMUSG00000062593	0.886653	Lilrb4a	10	1.96199
ENSMUSG00000030707	0.88463	Coro1a	10	2.06761
ENSMUSG00000051439	0.881786	Cd14	10	2.79442
ENSMUSG00000034708	0.880836	Grn	10	1.21256
ENSMUSG00000018774	0.879513	Cd68	10	1.78774
ENSMUSG00000019122	0.876872	Ccl9	10	2.59661
ENSMUSG00000060802	0.876723	B2m	10	1.05344
ENSMUSG00000023349	0.868385	Clec4n	10	2.54183
ENSMUSG00000059326	0.867971	Csf2ra	10	1.36678
ENSMUSG00000022150	0.867097	Dab2	10	1.49071
ENSMUSG00000015340	0.866888	Cybb	10	1.5316
ENSMUSG00000033685	0.859916	Ucp2	10	1.53011
ENSMUSG00000032359	0.852748	Ctsh	10	1.23325
ENSMUSG00000028843	0.851625	Sh3bgrl3	10	1.05171
ENSMUSG00000024965	0.851128	Fermt3	10	1.3235
ENSMUSG00000046805	0.851124	Mpeg1	10	1.5024
ENSMUSG00000071715	0.849385	Ncf4	10	1.14746
ENSMUSG00000048163	0.84785	Selplg	10	1.41038
ENSMUSG00000018008	0.845675	Cyth4	10	1.30768
ENSMUSG00000024661	0.844647	Fth1	10	1.05026
ENSMUSG00000061232	0.839824	H2-K1	10	1.06202
ENSMUSG00000036594	0.838971	H2-Aa	10	3.25672
ENSMUSG00000032554	0.835521	Trf	10	1.56774
ENSMUSG00000036896	0.832871	C1qc	10	3.42598
ENSMUSG00000052160	0.83261	Pld4	10	1.51179
ENSMUSG00000036887	0.832331	C1qa	10	3.78324
ENSMUSG00000030786	0.832272	Itgam	10	1.62801
ENSMUSG00000089672	0.831204	Lilr4b	10	1.66692
ENSMUSG00000000290	0.829973	Itgb2	10	1.54191
ENSMUSG00000030220	0.82851	Arhgdib	10	1.13269
ENSMUSG00000046245	0.828279	Pilra	10	1.1268
ENSMUSG00000063856	0.826418	Gpx1	10	1.1346
ENSMUSG00000026480	0.824908	Ncf2	10	1.29673
ENSMUSG00000017760	0.822441	Ctsa	10	1.24227
ENSMUSG00000018585	0.818483	Atox1	10	1.09408
ENSMUSG00000030793	0.818038	Pycard	10	1.38849
ENSMUSG00000021190	0.816508	Lgmn	10	1.48808
ENSMUSG00000030214	0.814183	Plbd1	10	1.39548
ENSMUSG00000024679	0.813729	Ms4a6d	10	1.52291
ENSMUSG00000044811	0.813623	AF251705	10	1.25439
ENSMUSG00000079419	0.81362	Ms4a6c	10	1.74496
ENSMUSG00000020120	0.810661	Plek	10	1.38982
ENSMUSG00000027398	0.809183	Il1b	10	2.46621
ENSMUSG00000023067	0.808006	Cdkn1a	10	1.443
ENSMUSG00000009687	0.804827	Fxyd5	10	1.18372
ENSMUSG00000050335	0.804299	Lgals3	10	1.05112
ENSMUSG00000028494	0.797678	Plin2	10	1.06611
ENSMUSG00000021423	0.796009	Ly86	10	1.52009
ENSMUSG00000060586	0.795714	H2-Eb1	10	2.92926
ENSMUSG00000004730	0.795632	Adgre1	10	1.56378
ENSMUSG00000024397	0.79539	Aif1	10	1.74738
ENSMUSG00000049130	0.794736	C5ar1	10	1.58184
ENSMUSG00000022378	0.79231	Fam49b	10	1.09816
ENSMUSG00000060791	0.792092	Gmfg	10	1.43103
ENSMUSG00000026126	0.78964	Ptpn18	10	1.34112
ENSMUSG00000038811	0.784623	Gngt2	10	1.13299
ENSMUSG00000018920	0.781587	Cxcl16	10	1.26768
ENSMUSG00000079547	0.778824	H2-DMb1	10	1.61977
ENSMUSG00000025044	0.777586	Msr1	10	1.1801
ENSMUSG00000022901	0.777577	Cd86	10	1.10769
ENSMUSG00000079227	0.777516	Ccr5	10	1.16468
ENSMUSG00000024677	0.77739	Ms4a6b	10	1.33751
ENSMUSG00000026358	0.777146	Rgs1	10	2.27574
ENSMUSG00000026395	0.774888	Ptprc	10	1.03336
ENSMUSG00000024014	0.769468	Pim1	10	1.02658
ENSMUSG00000035493	0.76313	Tgfbi	10	1.59659
ENSMUSG00000024338	0.760818	Psmb8	10	1.06108
ENSMUSG00000058427	0.759495	Cxcl2	10	2.79218
ENSMUSG00000031444	0.759139	F10	10	1.39439
ENSMUSG00000038147	0.758754	Cd84	10	1.00051
ENSMUSG00000029373	0.75706	Pf4	10	1.99055
ENSMUSG00000060216	0.755988	Arrb2	10	1.01511
ENSMUSG00000037966	0.754151	Ninj1	10	1.02121
ENSMUSG00000071713	0.753654	Csf2rb	10	1.03417
ENSMUSG00000038612	0.752074	Mcl1	10	1.07521
ENSMUSG00000056069	0.751681	Fam105a	10	1.29929
ENSMUSG00000004266	0.751413	Ptpn6	10	1.23566
ENSMUSG00000074622	0.749966	Mafb	10	1.42486
ENSMUSG00000005142	0.743029	Man2b1	10	1.12393
ENSMUSG00000030144	0.739407	Clec4d	10	1.09873
ENSMUSG00000029925	0.739154	Tbxas1	10	1.00748
ENSMUSG00000023992	0.738934	Trem2	10	1.07366
ENSMUSG00000026360	0.738603	Rgs2	10	1.02324
ENSMUSG00000075705	0.738184	Msrb1	10	1.00772
ENSMUSG00000102037	0.738125	Bcl2a1a	10	1.16075
ENSMUSG00000007891	0.737188	Ctsd	10	1.16856
ENSMUSG00000072620	0.733734	Slfn2	10	1.00564
ENSMUSG00000023913	0.73026	Pla2g7	10	1.12118
ENSMUSG00000037902	0.729094	Sirpa	10	1.16537
ENSMUSG00000040152	0.721723	Thbs1	10	1.40563
ENSMUSG00000002204	0.721597	Napsa	10	1.2185
ENSMUSG00000099974	0.72023	Bcl2a1d	10	1.05709
ENSMUSG00000047798	0.719916	Cd300lf	10	1.03698
ENSMUSG00000040552	0.719494	C3ar1	10	1.03287
ENSMUSG00000037820	0.716944	Tgm2	10	1.40731
ENSMUSG00000040751	0.709974	Lat2	10	1.07145
ENSMUSG00000027995	0.706384	Tlr2	10	1.1038
ENSMUSG00000058755	0.703089	Osm	10	1.07668
ENSMUSG00000056529	0.702549	Ptafr	10	1.00565
ENSMUSG00000018930	0.702505	Ccl4	10	2.32958
ENSMUSG00000003484	0.701912	Cyp4f18	10	1.07098
ENSMUSG00000048779	0.700993	P2ry6	10	1.07492
ENSMUSG00000001348	0.700112	Acp5	10	1.47773
ENSMUSG00000026712	0.697379	Mrc1	10	1.26465
ENSMUSG00000073412	0.691726	Lst1	10	1.12882
ENSMUSG00000005413	0.686578	Hmox1	10	1.23878
ENSMUSG00000049103	0.685111	Ccr2	10	1.32042
ENSMUSG00000019872	0.678298	Smpdl3a	10	1.03859
ENSMUSG00000020377	0.674933	Ltc4s	10	1.25588
ENSMUSG00000021665	0.673806	Hexb	10	1.09844
ENSMUSG00000063889	0.668842	Crem	10	1.04639
ENSMUSG00000015852	0.666536	Fcrls	10	1.17205
ENSMUSG00000024672	0.666431	Ms4a7	10	1.77643
ENSMUSG00000015396	0.665647	Cd83	10	1.12226
ENSMUSG00000000982	0.664975	Ccl3	10	1.73653
ENSMUSG00000076441	0.649855	Ass1	10	1.24975
ENSMUSG00000040809	0.646893	Chil3	10	2.34082
ENSMUSG00000026938	0.644007	Fcna	10	1.25076
ENSMUSG00000040950	0.629529	Mgl2	10	1.18217
ENSMUSG00000049723	0.628714	Mmp12	10	2.00935
ENSMUSG00000091971	0.615054	Hspa1a	10	1.79729
ENSMUSG00000004814	0.593074	Ccl24	10	1.29402
ENSMUSG00000043421	0.592898	Hilpda	10	1.20587
ENSMUSG00000031780	0.552191	Ccl17	10	1.61483
ENSMUSG00000006014	0.546725	Prg4	10	1.35126
ENSMUSG00000026073	0.53178	Il1r2	10	1.23773
ENSMUSG00000040026	0.523514	Saa3	10	1.44851
ENSMUSG00000009185	0.51613	Ccl8	10	1.2091
ENSMUSG00000025491	0.508524	Ifitm1	10	1.32348
