# Supplementary material for: Cross-Species Single-Cell Analysis of Pancreatic Ductal Adenocarcinoma Reveals Antigen-Presenting Cancer-Associated Fibroblasts
Source: Oxford University Press journal article supplement (doi:10.1158/2159-8290.cd-19-0094), 2019-06-13
Supplement: 21598290cd190094-sup-215864_2_supp_5552233_ps91bq.xlsx [file 21598290cd190094-sup-215864_2_supp_5552233_ps91bq.xlsx]

## Sheet: iCAF
	Score	Associated.Gene.Name	dbCluster	avgDiff
ENSMUSG00000025784	0.960366	Clec3b	1	2.16767
ENSMUSG00000026879	0.941164	Gsn	1	2.04403
ENSMUSG00000027832	0.828889	Ptx3	1	1.8782
ENSMUSG00000079018	0.940947	Ly6c1	1	1.83522
ENSMUSG00000020467	0.922885	Efemp1	1	1.64109
ENSMUSG00000075602	0.93721	Ly6a	1	1.60134
ENSMUSG00000031380	0.865363	Figf	1	1.59398
ENSMUSG00000053475	0.803744	Tnfaip6	1	1.54765
ENSMUSG00000079017	0.847179	Ifi27l2a	1	1.46381
ENSMUSG00000026574	0.91909	Dpt	1	1.42967
ENSMUSG00000030790	0.781586	Adm	1	1.41478
ENSMUSG00000028517	0.901	Plpp3	1	1.40215
ENSMUSG00000033327	0.920713	Tnxb	1	1.39687
ENSMUSG00000061353	0.747765	Cxcl12	1	1.36817
ENSMUSG00000058135	0.822697	Gstm1	1	1.31801
ENSMUSG00000073418	0.885204	C4b	1	1.28948
ENSMUSG00000021390	0.825451	Ogn	1	1.27954
ENSMUSG00000024164	0.884419	C3	1	1.26526
ENSMUSG00000015354	0.84518	Pcolce2	1	1.25284
ENSMUSG00000029380	0.766056	Cxcl1	1	1.24876
ENSMUSG00000022371	0.859398	Col14a1	1	1.23487
ENSMUSG00000028369	0.856119	Svep1	1	1.22776
ENSMUSG00000022894	0.829081	Adamts5	1	1.22406
ENSMUSG00000031722	0.762647	Hp	1	1.21009
ENSMUSG00000003665	0.756767	Has1	1	1.20754
ENSMUSG00000034463	0.85598	Scara3	1	1.13235
ENSMUSG00000054203	0.833984	Ifi205	1	1.09634
ENSMUSG00000019278	0.828167	Dpep1	1	1.07959
ENSMUSG00000021319	0.725309	Sfrp4	1	1.06251
ENSMUSG00000039405	0.789102	Prss23	1	1.02625
ENSMUSG00000044337	0.779727	Ackr3	1	1.02456
ENSMUSG00000029096	0.801051	Htra3	1	0.999155
ENSMUSG00000002985	0.682437	Apoe	1	0.99835
ENSMUSG00000035373	0.713175	Ccl7	1	0.968738
ENSMUSG00000025746	0.676217	Il6	1	0.968205
ENSMUSG00000027996	0.735126	Sfrp2	1	0.967008
ENSMUSG00000002847	0.77162	Pla1a	1	0.962239
ENSMUSG00000022032	0.812203	Scara5	1	0.961395
ENSMUSG00000047793	0.784976	Sned1	1	0.957732

## Sheet: apCAF
	Score	Associated.Gene.Name	dbCluster	avgDiff
ENSMUSG00000017002	0.938622	Slpi	2	3.94022
ENSMUSG00000040026	0.849917	Saa3	2	3.20607
ENSMUSG00000024610	0.820421	Cd74	2	2.9679
ENSMUSG00000062345	0.652999	Serpinb2	2	1.85865
ENSMUSG00000063011	0.738666	Msln	2	1.77988
ENSMUSG00000053522	0.901626	Lgals7	2	1.71003
ENSMUSG00000073421	0.802696	H2-Ab1	2	1.70565
ENSMUSG00000042985	0.799992	Upk3b	2	1.67498
ENSMUSG00000020911	0.747481	Krt19	2	1.64528
ENSMUSG00000027574	0.91556	Nkain4	2	1.53073
ENSMUSG00000030669	0.691384	Calca	2	1.4845
ENSMUSG00000020733	0.936236	Slc9a3r1	2	1.4708
ENSMUSG00000022037	0.869642	Clu	2	1.4192
ENSMUSG00000022425	0.681245	Enpp2	2	1.37968
ENSMUSG00000049382	0.822761	Krt8	2	1.37379
ENSMUSG00000060586	0.726292	H2-Eb1	2	1.34693
ENSMUSG00000004951	0.874011	Hspb1	2	1.34667
ENSMUSG00000049436	0.78156	Upk1b	2	1.33163
ENSMUSG00000036594	0.717222	H2-Aa	2	1.27954
ENSMUSG00000017969	0.920254	Ptgis	2	1.24364
ENSMUSG00000022865	0.913786	Cxadr	2	1.23232
ENSMUSG00000023043	0.756026	Krt18	2	1.17332
ENSMUSG00000052397	0.851752	Ezr	2	1.14311
ENSMUSG00000060962	0.817133	Dmkn	2	1.11452
ENSMUSG00000028989	0.593201	Angptl7	2	1.09721
ENSMUSG00000023039	0.683315	Krt7	2	1.06475
ENSMUSG00000030220	0.89606	Arhgdib	2	1.03609
ENSMUSG00000007655	0.837031	Cav1	2	1.02268
ENSMUSG00000072601	0.621437	Ear1	2	0.974594
ENSMUSG00000024661	0.86064	Fth1	2	0.969528
ENSMUSG00000029371	0.629573	Cxcl5	2	0.966671
ENSMUSG00000031517	0.770798	Gpm6a	2	0.961628
ENSMUSG00000017009	0.80167	Sdc4	2	0.956392
ENSMUSG00000032554	0.789024	Trf	2	0.954537
ENSMUSG00000074227	0.842822	Spint2	2	0.951235

## Sheet: myCAF
	Score	Associated.Gene.Name	dbCluster	avgDiff
ENSMUSG00000029304	0.71165	Spp1	3	2.22172
ENSMUSG00000026249	0.790637	Serpine2	3	2.01356
ENSMUSG00000021508	0.666593	Cxcl14	3	1.79694
ENSMUSG00000007888	0.771561	Crlf1	3	1.69979
ENSMUSG00000020427	0.647411	Igfbp3	3	1.61027
ENSMUSG00000035783	0.716107	Acta2	3	1.6059
ENSMUSG00000032085	0.712367	Tagln	3	1.48844
ENSMUSG00000032011	0.800414	Thy1	3	1.45613
ENSMUSG00000068196	0.749557	Col8a1	3	1.2971
ENSMUSG00000054196	0.750034	Cthrc1	3	1.28062
ENSMUSG00000031548	0.769273	Sfrp1	3	1.25094
ENSMUSG00000028364	0.695632	Tnc	3	1.24082
ENSMUSG00000029309	0.677628	Sparcl1	3	1.22351
ENSMUSG00000028339	0.764357	Col15a1	3	1.10398
ENSMUSG00000032332	0.750781	Col12a1	3	1.0764
ENSMUSG00000002603	0.729015	Tgfb1	3	1.05827
ENSMUSG00000001506	0.842731	Col1a1	3	1.04596
ENSMUSG00000020592	0.750873	Sdc1	3	1.04221
ENSMUSG00000042254	0.656683	Cilp	3	0.984661
ENSMUSG00000000031	0.568758	H19	3	0.980847
ENSMUSG00000023885	0.753889	Thbs2	3	0.967546
