# Supplementary material for: Cross-Species Single-Cell Analysis of Pancreatic Ductal Adenocarcinoma Reveals Antigen-Presenting Cancer-Associated Fibroblasts
Source: Oxford University Press journal article supplement (doi:10.1158/2159-8290.cd-19-0094), 2019-06-13
Supplement: 21598290cd190094-sup-215864_2_supp_5552236_ps91bq.xlsx [file 21598290cd190094-sup-215864_2_supp_5552236_ps91bq.xlsx]

## Sheet: MRs_mouse_iCAFs
mgi_symbol	Regulon	Size	NES	p.value	FDR
Zfp521	ENSMUSG00000024420	27	7.03	2.01e-12	4.68e-09
Igf1	ENSMUSG00000020053	219	6.67	2.49e-11	2.9e-08
Pcdh19	ENSMUSG00000051323	132	5.92	3.3e-09	1.73e-06
Ly6a	ENSMUSG00000075602	393	5.9	3.72e-09	1.73e-06
Il6ra	ENSMUSG00000027947	57	5.64	1.7e-08	6.22e-06
Dapk1	ENSMUSG00000021559	120	5.58	2.42e-08	6.34e-06
Ly6c1	ENSMUSG00000079018	250	5.58	2.45e-08	6.34e-06
Ddr2	ENSMUSG00000026674	111	5.53	3.13e-08	7.27e-06
Fyn	ENSMUSG00000019843	118	5.43	5.54e-08	1.07e-05
Tcf21	ENSMUSG00000045680	120	5.39	6.99e-08	1.25e-05
Ntrk2	ENSMUSG00000055254	30	5.33	9.73e-08	1.62e-05
Plce1	ENSMUSG00000024998	138	5.3	1.13e-07	1.7e-05
Thbd	ENSMUSG00000074743	117	5.27	1.36e-07	1.78e-05
Il6	ENSMUSG00000025746	155	5.26	1.45e-07	1.78e-05
Tnfsf13b	ENSMUSG00000031497	94	5.26	1.44e-07	1.78e-05
Asap2	ENSMUSG00000052632	131	5.21	1.88e-07	1.99e-05
Lmo2	ENSMUSG00000032698	135	5.13	2.84e-07	2.86e-05
Gngt2	ENSMUSG00000038811	112	5.12	3.08e-07	2.86e-05
Anxa3	ENSMUSG00000029484	114	4.98	6.23e-07	4.99e-05
Scara5	ENSMUSG00000022032	141	4.95	7.42e-07	5.56e-05
Scn7a	ENSMUSG00000034810	120	4.95	7.33e-07	5.56e-05
Il15ra	ENSMUSG00000023206	64	4.92	8.5e-07	6.17e-05
S100a16	ENSMUSG00000074457	137	4.88	1.04e-06	6.96e-05
Aebp1	ENSMUSG00000020473	231	4.85	1.21e-06	7.41e-05
Fam129a	ENSMUSG00000026483	140	4.84	1.31e-06	7.45e-05
Ar	ENSMUSG00000046532	114	4.84	1.32e-06	7.45e-05
Gpc3	ENSMUSG00000055653	113	4.84	1.27e-06	7.45e-05
Fez1	ENSMUSG00000032118	153	4.82	1.46e-06	7.99e-05
Shc2	ENSMUSG00000020312	150	4.81	1.48e-06	7.99e-05
Hdac7	ENSMUSG00000022475	118	4.81	1.53e-06	8.09e-05
Tgfbr2	ENSMUSG00000032440	111	4.8	1.58e-06	8.18e-05
Gpc6	ENSMUSG00000058571	112	4.77	1.89e-06	9.26e-05
Ahnak	ENSMUSG00000069833	115	4.76	1.91e-06	9.26e-05
Gpnmb	ENSMUSG00000029816	149	4.72	2.4e-06	0.000105
Cd55	ENSMUSG00000026399	116	4.68	2.9e-06	0.000117
Sytl2	ENSMUSG00000030616	60	4.68	2.9e-06	0.000117
Egr1	ENSMUSG00000038418	280	4.68	2.93e-06	0.000117
Tmem100	ENSMUSG00000069763	125	4.68	2.92e-06	0.000117
Kctd12	ENSMUSG00000098557	134	4.66	3.16e-06	0.000122
Spry2	ENSMUSG00000022114	122	4.64	3.4e-06	0.000128
Stxbp6	ENSMUSG00000046314	67	4.63	3.69e-06	0.000136
Ebf1	ENSMUSG00000057098	142	4.62	3.77e-06	0.000137
Atp8b1	ENSMUSG00000039529	158	4.61	3.95e-06	0.000141
Adgrd1	ENSMUSG00000044017	111	4.5	6.85e-06	0.000215
Cd248	ENSMUSG00000056481	127	4.48	7.48e-06	0.000229
Entpd2	ENSMUSG00000015085	117	4.47	7.8e-06	0.000232
Abca8a	ENSMUSG00000041828	28	4.46	8.07e-06	0.000237
Dpep1	ENSMUSG00000019278	209	4.46	8.21e-06	0.000238
Cadm3	ENSMUSG00000005338	131	4.45	8.71e-06	0.000245
Fabp4	ENSMUSG00000062515	125	4.44	9.21e-06	0.000255
Cd34	ENSMUSG00000016494	121	4.42	9.7e-06	0.000265
Cd47	ENSMUSG00000055447	126	4.42	9.84e-06	0.000266
Zbtb20	ENSMUSG00000022708	112	4.4	1.06e-05	0.000281
Slc10a6	ENSMUSG00000029321	127	4.36	1.28e-05	0.000327
Enpp5	ENSMUSG00000023960	140	4.34	1.44e-05	0.000364
Lamp2	ENSMUSG00000016534	118	4.33	1.47e-05	0.000368
Pfdn5	ENSMUSG00000001289	118	4.31	1.61e-05	0.000384
Nox4	ENSMUSG00000030562	144	4.31	1.62e-05	0.000384
Aes	ENSMUSG00000054452	118	4.31	1.62e-05	0.000384
Fgf2	ENSMUSG00000037225	126	4.28	1.84e-05	0.000423
Atf3	ENSMUSG00000026628	143	4.27	2e-05	0.000451
Fzd4	ENSMUSG00000049791	99	4.27	1.99e-05	0.000451
Ptger4	ENSMUSG00000039942	152	4.26	2.06e-05	0.000454
Zfhx4	ENSMUSG00000025255	120	4.23	2.31e-05	0.000497
Chl1	ENSMUSG00000030077	120	4.22	2.49e-05	0.000513
Ebf2	ENSMUSG00000022053	128	4.2	2.69e-05	0.00054
Klf4	ENSMUSG00000003032	244	4.15	3.31e-05	0.000641
Anxa1	ENSMUSG00000024659	150	4.14	3.44e-05	0.000647
Zfp36	ENSMUSG00000044786	209	4.14	3.41e-05	0.000647
Klf13	ENSMUSG00000052040	114	4.14	3.46e-05	0.000647
Ggt5	ENSMUSG00000006344	121	4.13	3.59e-05	0.000647
Tgfbr3	ENSMUSG00000029287	113	4.13	3.59e-05	0.000647
Nrp1	ENSMUSG00000025810	112	4.13	3.69e-05	0.000654
Nr3c1	ENSMUSG00000024431	113	4.11	3.89e-05	0.000675
Slc4a4	ENSMUSG00000060961	143	4.1	4.05e-05	0.000692
Zeb2	ENSMUSG00000026872	114	4.08	4.45e-05	0.000733
Lrp1	ENSMUSG00000040249	113	4.08	4.48e-05	0.000733
Gsn	ENSMUSG00000026879	219	4.03	5.66e-05	0.000866
Zfp36l1	ENSMUSG00000021127	116	4.01	6.03e-05	0.000911
Lpl	ENSMUSG00000015568	114	3.97	7.05e-05	0.00102
Errfi1	ENSMUSG00000028967	116	3.97	7.18e-05	0.00102
Thsd7a	ENSMUSG00000032625	69	3.97	7.31e-05	0.00103
Dpp4	ENSMUSG00000035000	133	3.96	7.43e-05	0.00104
Cdon	ENSMUSG00000038119	114	3.95	7.82e-05	0.00107
Cxcl12	ENSMUSG00000061353	123	3.92	8.72e-05	0.00115
Nr1h3	ENSMUSG00000002108	152	3.92	8.95e-05	0.00117
Atp1a2	ENSMUSG00000007097	35	3.91	9.05e-05	0.00118
Ramp2	ENSMUSG00000001240	118	3.91	9.41e-05	0.0012
Ncoa7	ENSMUSG00000039697	137	3.87	0.00011	0.00135
Emb	ENSMUSG00000021728	128	3.86	0.000115	0.00139
Pla2r1	ENSMUSG00000054580	65	3.85	0.000117	0.00141
Heg1	ENSMUSG00000075254	117	3.85	0.00012	0.00144
Gabarap	ENSMUSG00000018567	131	3.84	0.000124	0.00147
Ace	ENSMUSG00000020681	121	3.83	0.00013	0.0015
Dnm1	ENSMUSG00000026825	131	3.83	0.000129	0.0015
Gabra3	ENSMUSG00000031343	118	3.83	0.00013	0.0015
Ackr3	ENSMUSG00000044337	96	3.83	0.000129	0.0015
Lims2	ENSMUSG00000024395	49	3.81	0.00014	0.00159
Cask	ENSMUSG00000031012	144	3.8	0.000143	0.00161
Smpd3	ENSMUSG00000031906	125	3.79	0.000149	0.00165
Arrdc3	ENSMUSG00000074794	71	3.79	0.000152	0.00168
Fhl1	ENSMUSG00000023092	118	3.78	0.000157	0.00171
Lpar1	ENSMUSG00000038668	114	3.77	0.000164	0.00178
Eya2	ENSMUSG00000017897	44	3.76	0.000173	0.00178
Pam	ENSMUSG00000026335	115	3.76	0.000169	0.00178
Vgll3	ENSMUSG00000091243	111	3.76	0.000173	0.00178
Cdkn1c	ENSMUSG00000037664	113	3.75	0.000174	0.00178
Tek	ENSMUSG00000006386	34	3.75	0.000177	0.0018
Slco3a1	ENSMUSG00000025790	123	3.74	0.000186	0.00182
Gas7	ENSMUSG00000033066	114	3.74	0.000182	0.00182
Fxyd1	ENSMUSG00000036570	119	3.74	0.000185	0.00182
Akap12	ENSMUSG00000038587	120	3.74	0.000187	0.00182
Nr4a1	ENSMUSG00000023034	263	3.7	0.000214	0.00203
Fosl2	ENSMUSG00000029135	108	3.69	0.000223	0.00207
Sptbn1	ENSMUSG00000020315	119	3.68	0.000229	0.00212
Gstm2	ENSMUSG00000040562	116	3.66	0.000249	0.00229
Grk5	ENSMUSG00000003228	101	3.65	0.000263	0.00236
Cfh	ENSMUSG00000026365	116	3.63	0.000279	0.00245
Axl	ENSMUSG00000002602	117	3.63	0.000287	0.0025
Acvrl1	ENSMUSG00000000530	114	3.62	0.000296	0.00254
Irf2	ENSMUSG00000031627	135	3.62	0.000298	0.00254
Nfkbiz	ENSMUSG00000035356	119	3.61	0.000307	0.00261
Sspn	ENSMUSG00000030255	130	3.61	0.000311	0.00263
H2-D1	ENSMUSG00000073411	305	3.58	0.000341	0.00279
Apoe	ENSMUSG00000002985	151	3.57	0.000352	0.00284
Nkx2-3	ENSMUSG00000044220	136	3.56	0.000365	0.00291
Mycbp2	ENSMUSG00000033004	109	3.55	0.000381	0.00298
Clstn1	ENSMUSG00000039953	125	3.55	0.000378	0.00298
Nedd4	ENSMUSG00000032216	141	3.54	0.000393	0.00306
Irak3	ENSMUSG00000020227	156	3.54	0.000397	0.00307
Sp140	ENSMUSG00000070031	154	3.53	0.000413	0.00318
Ly6e	ENSMUSG00000022587	128	3.53	0.000418	0.0032
Antxr1	ENSMUSG00000033420	109	3.51	0.000451	0.00333
Runx1t1	ENSMUSG00000006586	159	3.5	0.000472	0.00346
F3	ENSMUSG00000028128	115	3.49	0.000477	0.00348
Add3	ENSMUSG00000025026	116	3.48	0.000506	0.00358
Zbtb16	ENSMUSG00000066687	129	3.47	0.000522	0.00367
Ece1	ENSMUSG00000057530	124	3.47	0.000527	0.00369
Arl4a	ENSMUSG00000047446	108	3.46	0.000537	0.00375
Aoc3	ENSMUSG00000019326	155	3.46	0.000542	0.00376
Ifitm2	ENSMUSG00000060591	239	3.43	0.00061	0.00414
Junb	ENSMUSG00000052837	359	3.4	0.000662	0.00442
Abca1	ENSMUSG00000015243	134	3.38	0.000716	0.00464
B2m	ENSMUSG00000060802	216	3.38	0.000724	0.00468
Nfia	ENSMUSG00000028565	111	3.38	0.000737	0.00473
Lamp1	ENSMUSG00000031447	115	3.37	0.000762	0.00484
Tshz2	ENSMUSG00000047907	114	3.37	0.00076	0.00484
Cavin1	ENSMUSG00000004044	112	3.36	0.000771	0.00488
App	ENSMUSG00000022892	127	3.36	0.000783	0.0049
Ifitm3	ENSMUSG00000025492	233	3.33	0.000878	0.00529
Reck	ENSMUSG00000028476	27	3.32	0.000891	0.00531
Fosb	ENSMUSG00000003545	299	3.32	0.000913	0.00537
Rabac1	ENSMUSG00000003380	115	3.3	0.000954	0.00557
Npr1	ENSMUSG00000027931	126	3.3	0.000977	0.00566
Uap1	ENSMUSG00000026670	110	3.3	0.000984	0.00567
Ank2	ENSMUSG00000032826	107	3.29	0.000997	0.00569
Fcgrt	ENSMUSG00000003420	115	3.29	0.00101	0.00575
Cebpb	ENSMUSG00000056501	121	3.24	0.00118	0.00651
Epas1	ENSMUSG00000024140	136	3.24	0.0012	0.00656
Steap3	ENSMUSG00000026389	114	3.24	0.00121	0.00656
Eef1a1	ENSMUSG00000037742	213	3.24	0.00121	0.00656
Myc	ENSMUSG00000022346	115	3.21	0.00131	0.007
Id2	ENSMUSG00000020644	113	3.2	0.0014	0.00731
Blvrb	ENSMUSG00000040466	111	3.19	0.0014	0.00731
Snx18	ENSMUSG00000042364	123	3.19	0.0014	0.00731
Mcc	ENSMUSG00000071856	58	3.19	0.00145	0.0075
Thra	ENSMUSG00000058756	113	3.18	0.00147	0.00758
Fndc1	ENSMUSG00000071984	117	3.17	0.0015	0.00768
Pir	ENSMUSG00000031379	27	3.15	0.00162	0.00801
Lynx1	ENSMUSG00000022594	133	3.14	0.00172	0.00838
Fat1	ENSMUSG00000070047	133	3.13	0.00174	0.00845
Lsp1	ENSMUSG00000018819	121	3.11	0.00185	0.00881
Pdgfra	ENSMUSG00000029231	110	3.1	0.00196	0.00918
Pde8a	ENSMUSG00000025584	146	3.09	0.00197	0.00925
Txnip	ENSMUSG00000038393	114	3.08	0.00208	0.00963
Ccnl1	ENSMUSG00000027829	111	3.06	0.00218	0.00999
Lifr	ENSMUSG00000054263	175	3.06	0.0022	0.01
Camk2n1	ENSMUSG00000046447	112	3.03	0.00247	0.0108
Sp1	ENSMUSG00000001280	149	3.02	0.00249	0.0108
Frmd6	ENSMUSG00000048285	114	3	0.0027	0.0115
Arrdc4	ENSMUSG00000042659	142	2.99	0.00279	0.0118
Klf2	ENSMUSG00000055148	277	2.99	0.0028	0.0118
Ntrk1	ENSMUSG00000028072	159	2.98	0.00287	0.0121
Nfkbia	ENSMUSG00000021025	361	2.96	0.00309	0.0127
Sdcbp	ENSMUSG00000028249	118	2.95	0.00318	0.013
Il17ra	ENSMUSG00000002897	165	2.93	0.00337	0.0135
Rbm39	ENSMUSG00000027620	122	2.92	0.00348	0.0138
Pmp22	ENSMUSG00000018217	118	2.91	0.00359	0.0141
Clec2d	ENSMUSG00000030157	28	2.91	0.00361	0.0141
Sulf2	ENSMUSG00000006800	116	2.9	0.00367	0.0142
Nfix	ENSMUSG00000001911	113	2.88	0.00401	0.0153
Klf3	ENSMUSG00000029178	112	2.88	0.00402	0.0153
Itm2b	ENSMUSG00000022108	211	2.86	0.0042	0.0157
Plxdc2	ENSMUSG00000026748	113	2.86	0.00423	0.0158
Fst	ENSMUSG00000021765	131	2.86	0.00427	0.0159
H2-Q4	ENSMUSG00000035929	73	2.82	0.00474	0.0172
Ndufa13	ENSMUSG00000036199	123	2.81	0.0049	0.0175
Slc29a1	ENSMUSG00000023942	114	2.81	0.00493	0.0176
Bst2	ENSMUSG00000046718	118	2.81	0.00503	0.0178
Zeb1	ENSMUSG00000024238	113	2.79	0.00522	0.0182
Irf7	ENSMUSG00000025498	119	2.79	0.00531	0.0185
Jmjd1c	ENSMUSG00000037876	113	2.77	0.00555	0.019
Btg2	ENSMUSG00000020423	221	2.77	0.00568	0.0192
Gpm6b	ENSMUSG00000031342	114	2.77	0.00565	0.0192
Crebrf	ENSMUSG00000048249	158	2.75	0.00595	0.0198
Mbd2	ENSMUSG00000024513	133	2.73	0.00638	0.0209
Irs2	ENSMUSG00000038894	137	2.72	0.00652	0.0211
Lrpap1	ENSMUSG00000029103	114	2.7	0.00685	0.022
Ndn	ENSMUSG00000033585	112	2.7	0.00687	0.022
Bcl2	ENSMUSG00000057329	32	2.66	0.0079	0.0243
Rap1b	ENSMUSG00000052681	113	2.65	0.00797	0.0244
Psd3	ENSMUSG00000030465	132	2.64	0.0082	0.0249
Igf1r	ENSMUSG00000005533	153	2.63	0.00849	0.0255
Chd3	ENSMUSG00000018474	109	2.63	0.00849	0.0255
Ski	ENSMUSG00000029050	118	2.62	0.00885	0.0263
Csf1	ENSMUSG00000014599	115	2.61	0.00892	0.0264
Basp1	ENSMUSG00000045763	120	2.61	0.00917	0.0268
Nptn	ENSMUSG00000032336	114	2.59	0.00965	0.0277
Pdcd4	ENSMUSG00000024975	112	2.58	0.00975	0.0279
Slc38a2	ENSMUSG00000022462	108	2.55	0.0108	0.03
Mmp2	ENSMUSG00000031740	175	2.53	0.0113	0.0309
Uchl1	ENSMUSG00000029223	33	2.48	0.013	0.0344
Cyba	ENSMUSG00000006519	119	2.48	0.0132	0.0346
Steap4	ENSMUSG00000012428	120	2.48	0.0132	0.0346
Peg3	ENSMUSG00000002265	37	2.44	0.0146	0.0375
Ncoa3	ENSMUSG00000027678	94	2.44	0.0148	0.0379
Igsf8	ENSMUSG00000038034	112	2.42	0.0156	0.0389
Pik3ip1	ENSMUSG00000034614	124	2.4	0.0166	0.0411
Atraid	ENSMUSG00000013622	112	2.39	0.0166	0.0411
Maf	ENSMUSG00000055435	121	2.39	0.0168	0.0414
Rgma	ENSMUSG00000070509	83	2.39	0.0168	0.0414
Rhou	ENSMUSG00000039960	116	2.39	0.017	0.0418
Apbb1ip	ENSMUSG00000026786	121	2.38	0.0174	0.0424
Sdf4	ENSMUSG00000029076	110	2.36	0.0182	0.044
Rock2	ENSMUSG00000020580	110	2.34	0.0193	0.0457
Egfr	ENSMUSG00000020122	114	2.33	0.0198	0.0463
Maml2	ENSMUSG00000031925	117	2.33	0.0197	0.0463
Ahnak2	ENSMUSG00000072812	113	2.31	0.021	0.0481
Dcun1d3	ENSMUSG00000048787	48	2.3	0.0216	0.049
Gem	ENSMUSG00000028214	114	2.29	0.0222	0.05
Rab29	ENSMUSG00000026433	53	2.28	0.0229	0.0511
Cbx6	ENSMUSG00000089715	108	2.27	0.0231	0.0515
Aplp2	ENSMUSG00000031996	117	2.27	0.0232	0.0517
Zfp385a	ENSMUSG00000000552	123	2.24	0.0248	0.0543
Apbb2	ENSMUSG00000029207	119	2.24	0.0248	0.0543
Zfp704	ENSMUSG00000040209	33	2.23	0.0257	0.0556
S1pr3	ENSMUSG00000067586	84	2.22	0.0263	0.0567
Pbx1	ENSMUSG00000052534	112	2.21	0.0274	0.0584
Dst	ENSMUSG00000026131	117	2.14	0.0322	0.0665
Swap70	ENSMUSG00000031015	155	2.13	0.0328	0.0673
Hivep2	ENSMUSG00000015501	139	2.13	0.0332	0.0679
Grasp	ENSMUSG00000000531	155	2.1	0.0355	0.0716
Svil	ENSMUSG00000024236	119	2.1	0.0361	0.0723
Cdk14	ENSMUSG00000028926	143	2.08	0.0378	0.0749
Ephb2	ENSMUSG00000028664	155	2.06	0.0389	0.0763
Prrx1	ENSMUSG00000026586	118	2.06	0.0392	0.0767
Dmpk	ENSMUSG00000030409	130	2.05	0.0406	0.0785
Lrp6	ENSMUSG00000030201	117	2.03	0.0424	0.0814
Rora	ENSMUSG00000032238	115	2.03	0.0427	0.0817
Pkn2	ENSMUSG00000004591	117	2.02	0.0435	0.0831
Tnks1bp1	ENSMUSG00000033955	117	2.01	0.0445	0.0847
Ppp1r10	ENSMUSG00000039220	111	2.01	0.0448	0.085
Tshz1	ENSMUSG00000046982	125	1.99	0.0461	0.0871
Setd7	ENSMUSG00000037111	127	1.98	0.0479	0.0896
Sgms2	ENSMUSG00000050931	86	1.97	0.0483	0.0902
Palm	ENSMUSG00000035863	115	1.94	0.052	0.0956
Mpdz	ENSMUSG00000028402	137	1.94	0.0522	0.0957
Zcchc24	ENSMUSG00000055538	110	1.92	0.0546	0.0995
Lima1	ENSMUSG00000023022	116	1.88	0.0603	0.108
Smad1	ENSMUSG00000031681	114	1.86	0.0632	0.112
Rbpj	ENSMUSG00000039191	109	1.81	0.0707	0.121
Rab11fip2	ENSMUSG00000040022	138	1.79	0.0734	0.125
Zfhx3	ENSMUSG00000038872	122	1.78	0.0753	0.128
Klf6	ENSMUSG00000000078	114	1.77	0.0764	0.129
Mitf	ENSMUSG00000035158	77	1.77	0.0761	0.129
Rere	ENSMUSG00000039852	123	1.77	0.0772	0.13
Dtnbp1	ENSMUSG00000057531	111	1.76	0.0791	0.132
Pkd1	ENSMUSG00000032855	159	1.74	0.0826	0.136
Nrip1	ENSMUSG00000048490	121	1.73	0.0831	0.137
Cd320	ENSMUSG00000002308	114	1.71	0.0868	0.141
Lrrk2	ENSMUSG00000036273	35	1.7	0.0886	0.143
Ifngr1	ENSMUSG00000020009	110	1.68	0.0938	0.15
Klf9	ENSMUSG00000033863	116	1.67	0.0946	0.151
Il3ra	ENSMUSG00000068758	110	1.67	0.0945	0.151
Kmt2c	ENSMUSG00000038056	135	1.67	0.0956	0.152
Dlg2	ENSMUSG00000052572	44	1.67	0.0955	0.152
Nr2c2	ENSMUSG00000005893	86	1.65	0.0982	0.155
Ptprj	ENSMUSG00000025314	147	1.64	0.101	0.159
Rhoq	ENSMUSG00000024143	121	1.63	0.103	0.161
Smurf2	ENSMUSG00000018363	142	1.62	0.105	0.165
Zfyve9	ENSMUSG00000034557	39	1.6	0.109	0.169
Chic2	ENSMUSG00000029229	115	1.59	0.111	0.171
Tns2	ENSMUSG00000037003	147	1.57	0.115	0.176
Ptp4a1	ENSMUSG00000026064	118	1.56	0.118	0.179
Elf1	ENSMUSG00000036461	120	1.55	0.121	0.183
Tnfsf12	ENSMUSG00000097328	109	1.54	0.123	0.185
Stx4a	ENSMUSG00000030805	113	1.54	0.123	0.186
Klf7	ENSMUSG00000025959	116	1.52	0.129	0.192
Rab3d	ENSMUSG00000019066	123	1.51	0.13	0.193
Pik3r1	ENSMUSG00000041417	152	1.51	0.132	0.195
Epb41l2	ENSMUSG00000019978	111	1.5	0.132	0.196
Plxna1	ENSMUSG00000030084	99	1.5	0.133	0.196
Slc50a1	ENSMUSG00000027953	117	1.5	0.134	0.197
Rab28	ENSMUSG00000029128	113	1.49	0.135	0.198
Pura	ENSMUSG00000043991	114	1.49	0.135	0.198
Tgfbr1	ENSMUSG00000007613	119	1.46	0.145	0.209
Evc	ENSMUSG00000029122	48	1.45	0.148	0.212
S100a6	ENSMUSG00000001025	200	1.44	0.15	0.215
Tgoln1	ENSMUSG00000056429	109	1.44	0.151	0.215
Id3	ENSMUSG00000007872	126	1.43	0.152	0.217
Sh3d19	ENSMUSG00000028082	114	1.43	0.153	0.218
Atf5	ENSMUSG00000038539	118	1.43	0.154	0.218
Pnrc1	ENSMUSG00000040128	123	1.42	0.154	0.219
Pxn	ENSMUSG00000029528	115	1.41	0.157	0.222
Tmem150a	ENSMUSG00000055912	110	1.41	0.16	0.224
Arhgap10	ENSMUSG00000037148	120	1.4	0.16	0.224
Hipk3	ENSMUSG00000027177	116	1.38	0.168	0.234
Picalm	ENSMUSG00000039361	110	1.38	0.168	0.234
Itpr2	ENSMUSG00000030287	34	1.37	0.17	0.236
Snapc5	ENSMUSG00000032398	112	1.36	0.173	0.24
Tcf7l2	ENSMUSG00000024985	117	1.34	0.181	0.249
Rras	ENSMUSG00000038387	110	1.34	0.181	0.249
Itm2c	ENSMUSG00000026223	113	1.33	0.183	0.251
Sfrp1	ENSMUSG00000031548	219	1.31	0.19	0.259
Sgce	ENSMUSG00000004631	110	1.31	0.191	0.26
Arhgap21	ENSMUSG00000036591	32	1.3	0.192	0.261
Fos	ENSMUSG00000021250	362	1.29	0.196	0.263
Zscan26	ENSMUSG00000022228	124	1.29	0.195	0.263
Fgfr1	ENSMUSG00000031565	110	1.27	0.205	0.274
Crebbp	ENSMUSG00000022521	123	1.26	0.207	0.275
Foxn2	ENSMUSG00000034998	57	1.26	0.207	0.275
Setd1b	ENSMUSG00000038384	79	1.24	0.214	0.282
Braf	ENSMUSG00000002413	82	1.2	0.231	0.3
Arid1b	ENSMUSG00000069729	137	1.2	0.231	0.301
Dab2ip	ENSMUSG00000026883	95	1.17	0.243	0.313
Trak1	ENSMUSG00000032536	65	1.14	0.254	0.326
Stat2	ENSMUSG00000040033	42	1.13	0.259	0.332
Rpsa	ENSMUSG00000032518	174	1.13	0.261	0.333
Xrn1	ENSMUSG00000032410	127	1.12	0.261	0.334
Zbtb4	ENSMUSG00000018750	127	1.09	0.274	0.347
Rab8b	ENSMUSG00000036943	132	1.09	0.278	0.35
Asxl2	ENSMUSG00000037486	139	1.08	0.279	0.352
Rapgef6	ENSMUSG00000037533	147	1.08	0.279	0.352
Zhx1	ENSMUSG00000022361	162	1.05	0.295	0.368
Tmem127	ENSMUSG00000034850	136	1.05	0.294	0.368
Irf2bp2	ENSMUSG00000051495	127	1.05	0.296	0.369
Elk4	ENSMUSG00000026436	124	1.02	0.309	0.381
Acy3	ENSMUSG00000024866	81	1.01	0.31	0.382
Zfp280d	ENSMUSG00000038535	44	1.01	0.313	0.385
Tcf7l1	ENSMUSG00000055799	149	1.01	0.314	0.385
Stag2	ENSMUSG00000025862	138	0.99	0.323	0.396
Zmym2	ENSMUSG00000021945	64	0.98	0.329	0.401
Gprc5b	ENSMUSG00000008734	114	0.95	0.341	0.413
Atp1b1	ENSMUSG00000026576	140	0.95	0.342	0.413
Cltb	ENSMUSG00000047547	113	0.95	0.34	0.413
Sri	ENSMUSG00000003161	113	0.95	0.343	0.415
Gli3	ENSMUSG00000021318	150	0.95	0.343	0.415
Dstyk	ENSMUSG00000042046	83	0.94	0.348	0.419
Atf7	ENSMUSG00000099083	90	0.94	0.348	0.419
Slit2	ENSMUSG00000031558	123	0.93	0.351	0.422
Nr4a3	ENSMUSG00000028341	124	0.92	0.358	0.429
Kmt2a	ENSMUSG00000002028	122	0.91	0.362	0.432
Top2b	ENSMUSG00000017485	114	0.91	0.365	0.435
Mylip	ENSMUSG00000038175	54	0.9	0.367	0.437
Tnfrsf1a	ENSMUSG00000030341	118	0.89	0.372	0.442
Dag1	ENSMUSG00000039952	108	0.89	0.373	0.443
Slc39a1	ENSMUSG00000052310	167	0.89	0.374	0.443
Macf1	ENSMUSG00000028649	115	0.88	0.379	0.448
Enpep	ENSMUSG00000028024	169	0.87	0.384	0.453
Sertad3	ENSMUSG00000055200	137	0.87	0.385	0.454
Arl4d	ENSMUSG00000034936	32	0.86	0.387	0.456
Trak2	ENSMUSG00000026028	37	0.85	0.394	0.463
Vstm4	ENSMUSG00000050666	145	0.82	0.412	0.482
Acly	ENSMUSG00000020917	115	0.81	0.416	0.486
Taf1	ENSMUSG00000031314	159	0.81	0.42	0.49
Notch2	ENSMUSG00000027878	128	0.8	0.423	0.492
Irf1	ENSMUSG00000018899	110	0.8	0.426	0.495
Sema6d	ENSMUSG00000027200	35	0.79	0.428	0.497
Zmat1	ENSMUSG00000052676	46	0.78	0.435	0.503
Sphk1	ENSMUSG00000061878	126	0.78	0.435	0.503
Hexim1	ENSMUSG00000048878	131	0.77	0.44	0.507
Chd9	ENSMUSG00000056608	116	0.77	0.44	0.507
Rasgrp2	ENSMUSG00000032946	31	0.77	0.441	0.508
Tbl1xr1	ENSMUSG00000027630	123	0.76	0.446	0.512
Smarca2	ENSMUSG00000024921	108	0.73	0.464	0.529
Ifitm1	ENSMUSG00000025491	150	0.7	0.482	0.546
Tcf4	ENSMUSG00000053477	114	0.69	0.493	0.557
Zfp36l2	ENSMUSG00000045817	116	0.68	0.495	0.558
Mier3	ENSMUSG00000032727	67	0.68	0.497	0.56
Jund	ENSMUSG00000071076	351	0.68	0.498	0.561
Rb1cc1	ENSMUSG00000025907	119	0.65	0.513	0.577
Foxo1	ENSMUSG00000044167	141	0.64	0.519	0.582
Zbtb44	ENSMUSG00000047412	91	0.63	0.526	0.587
Smad4	ENSMUSG00000024515	128	0.6	0.548	0.609
Sod1	ENSMUSG00000022982	116	0.6	0.549	0.61
Zc3hav1	ENSMUSG00000029826	115	0.59	0.558	0.618
Pdlim5	ENSMUSG00000028273	116	0.58	0.565	0.625
P2rx4	ENSMUSG00000029470	119	0.57	0.566	0.626
Arid1a	ENSMUSG00000007880	115	0.57	0.568	0.628
Hfe	ENSMUSG00000006611	132	0.57	0.57	0.629
Zmiz1	ENSMUSG00000007817	109	0.56	0.574	0.634
Abl1	ENSMUSG00000026842	134	0.56	0.578	0.637
Pbxip1	ENSMUSG00000042613	112	0.55	0.581	0.64
Atxn7	ENSMUSG00000021738	128	0.55	0.583	0.641
Slc44a1	ENSMUSG00000028412	110	0.55	0.583	0.641
Ldb1	ENSMUSG00000025223	126	0.55	0.585	0.643
Rftn2	ENSMUSG00000025978	65	0.54	0.587	0.645
Mysm1	ENSMUSG00000062627	124	0.54	0.59	0.648
Mst1r	ENSMUSG00000032584	38	0.54	0.592	0.65
Myof	ENSMUSG00000048612	113	0.53	0.594	0.651
Rab40b	ENSMUSG00000025170	150	0.52	0.602	0.66
Ap2b1	ENSMUSG00000035152	115	0.52	0.605	0.662
Sertad1	ENSMUSG00000008384	113	0.51	0.609	0.666
Crtc3	ENSMUSG00000030527	136	0.51	0.609	0.666
Dis3l	ENSMUSG00000032396	27	0.5	0.62	0.676
Fcho2	ENSMUSG00000041685	133	0.49	0.624	0.68
Ahctf1	ENSMUSG00000026491	127	0.48	0.634	0.689
Nsd3	ENSMUSG00000054823	118	0.47	0.638	0.693
Cry2	ENSMUSG00000068742	37	0.46	0.645	0.699
Aldh3b1	ENSMUSG00000024885	155	0.46	0.647	0.7
Cyth3	ENSMUSG00000018001	121	0.46	0.649	0.702
Mier1	ENSMUSG00000028522	114	0.45	0.649	0.702
Cpne2	ENSMUSG00000034361	110	0.45	0.651	0.703
Zfp592	ENSMUSG00000005621	73	0.44	0.657	0.708
Fer	ENSMUSG00000000127	126	0.43	0.669	0.719
Foxn3	ENSMUSG00000033713	116	0.41	0.685	0.734
Vangl1	ENSMUSG00000027860	41	0.4	0.692	0.742
Pofut1	ENSMUSG00000046020	91	0.39	0.697	0.746
Mib1	ENSMUSG00000024294	122	0.37	0.709	0.756
Pim1	ENSMUSG00000024014	117	0.37	0.712	0.759
Bnc2	ENSMUSG00000028487	126	0.37	0.715	0.76
Irak4	ENSMUSG00000059883	155	0.36	0.716	0.762
Ppp3cb	ENSMUSG00000021816	116	0.34	0.732	0.775
Prkca	ENSMUSG00000050965	134	0.34	0.732	0.775
Eef2	ENSMUSG00000034994	139	0.34	0.735	0.778
Plekha2	ENSMUSG00000031557	128	0.33	0.744	0.786
Trip10	ENSMUSG00000019487	113	0.31	0.759	0.8
Bach1	ENSMUSG00000025612	122	0.31	0.759	0.8
Rcor1	ENSMUSG00000037896	58	0.28	0.782	0.821
Gpd1l	ENSMUSG00000050627	135	0.26	0.792	0.828
Dennd4c	ENSMUSG00000038024	59	0.26	0.794	0.83
Ogt	ENSMUSG00000034160	119	0.25	0.803	0.839
Zfpm2	ENSMUSG00000022306	141	0.25	0.804	0.84
Zbtb7a	ENSMUSG00000035011	107	0.24	0.81	0.845
Abi1	ENSMUSG00000058835	113	0.24	0.813	0.847
Twist2	ENSMUSG00000007805	48	0.22	0.824	0.858
Cebpg	ENSMUSG00000056216	120	0.21	0.831	0.862
Mecp2	ENSMUSG00000031393	137	0.21	0.833	0.864
Samhd1	ENSMUSG00000027639	117	0.2	0.84	0.871
Eng	ENSMUSG00000026814	125	0.19	0.853	0.883
Vamp5	ENSMUSG00000073002	115	0.18	0.857	0.886
Srgap2	ENSMUSG00000026425	140	0.18	0.858	0.887
Smad3	ENSMUSG00000032402	163	0.17	0.864	0.891
Ezh1	ENSMUSG00000006920	37	0.17	0.867	0.893
Pard3	ENSMUSG00000025812	154	0.16	0.871	0.897
Ccnt1	ENSMUSG00000011960	127	0.16	0.873	0.898
D430042O09Rik	ENSMUSG00000032743	137	0.16	0.875	0.899
Pik3ca	ENSMUSG00000027665	129	0.14	0.886	0.91
Zfp655	ENSMUSG00000007812	128	0.14	0.891	0.913
Nisch	ENSMUSG00000021910	110	0.14	0.891	0.913
Clic4	ENSMUSG00000037242	113	0.13	0.9	0.922
Tsc22d3	ENSMUSG00000031431	120	0.12	0.904	0.925
Jag1	ENSMUSG00000027276	104	0.12	0.906	0.927
Rc3h2	ENSMUSG00000075376	119	0.11	0.914	0.933
Ybx3	ENSMUSG00000030189	127	0.11	0.916	0.935
Pik3c2a	ENSMUSG00000030660	92	0.1	0.921	0.938
Pkd2	ENSMUSG00000034462	110	0.09	0.928	0.945
Cd164	ENSMUSG00000019818	112	0.08	0.939	0.952
Eid1	ENSMUSG00000091337	112	0.08	0.938	0.952
Mdm4	ENSMUSG00000054387	143	0.08	0.94	0.954
Ttc17	ENSMUSG00000027194	40	0.07	0.943	0.956
Map3k12	ENSMUSG00000023050	55	0.06	0.949	0.961
Pth1r	ENSMUSG00000032492	136	0.06	0.95	0.961
Trafd1	ENSMUSG00000042726	121	0.06	0.953	0.963
Taf1b	ENSMUSG00000059669	26	0.06	0.954	0.964
Eed	ENSMUSG00000030619	127	0.05	0.96	0.968
Plscr4	ENSMUSG00000032377	125	0.05	0.961	0.968
Kmt5b	ENSMUSG00000045098	122	0.05	0.96	0.968
Fzd7	ENSMUSG00000041075	30	0.02	0.981	0.984
Llgl1	ENSMUSG00000020536	134	0.01	0.991	0.993
Peak1	ENSMUSG00000074305	131	0.01	0.992	0.993
Limd1	ENSMUSG00000025239	113	0.01	0.993	0.994
Zfp30	ENSMUSG00000047473	77	0.01	0.994	0.995
Kmt2d	ENSMUSG00000048154	149	0.01	0.995	0.995
Pten	ENSMUSG00000013663	116	0	0.997	0.997
Srr	ENSMUSG00000001323	64	-0.01	0.991	0.993
Igf2r	ENSMUSG00000023830	123	-0.02	0.986	0.988
Rc3h1	ENSMUSG00000040423	131	-0.03	0.974	0.978
Atf4	ENSMUSG00000042406	113	-0.03	0.973	0.978
Chd2	ENSMUSG00000078671	135	-0.03	0.976	0.98
Dnajb4	ENSMUSG00000028035	111	-0.03	0.979	0.983
Ubr2	ENSMUSG00000023977	126	-0.04	0.967	0.974
Baiap2	ENSMUSG00000025372	115	-0.04	0.969	0.975
Arap1	ENSMUSG00000032812	121	-0.04	0.969	0.975
Zdhhc9	ENSMUSG00000036985	91	-0.04	0.97	0.975
Aff1	ENSMUSG00000029313	36	-0.05	0.958	0.967
Cand1	ENSMUSG00000020114	116	-0.05	0.961	0.968
Slc41a3	ENSMUSG00000030089	157	-0.05	0.959	0.968
Rsf1	ENSMUSG00000035623	119	-0.06	0.952	0.962
Zzef1	ENSMUSG00000055670	132	-0.06	0.955	0.964
Ncoa6	ENSMUSG00000038369	93	-0.07	0.941	0.954
Mxd4	ENSMUSG00000037235	120	-0.07	0.944	0.956
Zbtb33	ENSMUSG00000048047	33	-0.07	0.944	0.956
Bdp1	ENSMUSG00000049658	125	-0.08	0.934	0.949
Slc22a17	ENSMUSG00000022199	134	-0.08	0.935	0.95
Sin3a	ENSMUSG00000042557	117	-0.09	0.927	0.944
Cat	ENSMUSG00000027187	117	-0.09	0.93	0.946
Pcbd2	ENSMUSG00000021496	109	-0.09	0.932	0.947
Zbtb7b	ENSMUSG00000028042	150	-0.09	0.932	0.947
Wasl	ENSMUSG00000029684	119	-0.1	0.917	0.936
Nf2	ENSMUSG00000009073	92	-0.1	0.921	0.938
Cdkn1b	ENSMUSG00000003031	127	-0.1	0.922	0.939
Sos1	ENSMUSG00000024241	47	-0.11	0.913	0.933
Tmem30a	ENSMUSG00000032328	113	-0.11	0.915	0.934
Fam126a	ENSMUSG00000028995	51	-0.12	0.904	0.925
Zfp266	ENSMUSG00000060510	119	-0.12	0.907	0.928
Aff4	ENSMUSG00000049470	115	-0.13	0.9	0.922
Clip3	ENSMUSG00000013921	118	-0.14	0.889	0.912
Ttc8	ENSMUSG00000021013	152	-0.14	0.891	0.914
Arnt	ENSMUSG00000015522	122	-0.15	0.881	0.905
Nck1	ENSMUSG00000032475	113	-0.16	0.871	0.897
Ikzf5	ENSMUSG00000040167	150	-0.16	0.87	0.897
Rnd1	ENSMUSG00000054855	99	-0.16	0.875	0.899
Rfx7	ENSMUSG00000037674	68	-0.17	0.865	0.891
Slc17a5	ENSMUSG00000049624	81	-0.18	0.855	0.884
Gab2	ENSMUSG00000004508	86	-0.18	0.859	0.887
Rab23	ENSMUSG00000004768	31	-0.18	0.859	0.887
Foxf1	ENSMUSG00000042812	47	-0.18	0.86	0.888
Adcy3	ENSMUSG00000020654	137	-0.19	0.849	0.88
Hltf	ENSMUSG00000002428	80	-0.19	0.852	0.882
Cpne3	ENSMUSG00000028228	114	-0.2	0.84	0.871
Rybp	ENSMUSG00000072872	26	-0.2	0.841	0.871
Tceal1	ENSMUSG00000049536	123	-0.21	0.83	0.862
Arhgap35	ENSMUSG00000058230	115	-0.21	0.83	0.862
Zfp292	ENSMUSG00000039967	118	-0.21	0.832	0.864
Ing3	ENSMUSG00000029670	87	-0.22	0.824	0.858
Ep300	ENSMUSG00000055024	114	-0.22	0.826	0.859
Meis3	ENSMUSG00000041420	109	-0.22	0.827	0.86
Epc2	ENSMUSG00000069495	157	-0.22	0.827	0.86
Egr2	ENSMUSG00000037868	119	-0.23	0.817	0.852
Trp53bp1	ENSMUSG00000043909	86	-0.24	0.81	0.845
Ptpn12	ENSMUSG00000028771	117	-0.24	0.811	0.846
Itch	ENSMUSG00000027598	146	-0.26	0.792	0.828
Bmpr2	ENSMUSG00000067336	117	-0.26	0.792	0.828
Slc7a1	ENSMUSG00000041313	60	-0.27	0.788	0.826
Ehmt1	ENSMUSG00000036893	116	-0.27	0.79	0.827
Tshz3	ENSMUSG00000021217	98	-0.27	0.79	0.828
Pdpk1	ENSMUSG00000024122	137	-0.28	0.782	0.821
Arid2	ENSMUSG00000033237	153	-0.28	0.781	0.821
Phf2	ENSMUSG00000038025	45	-0.28	0.783	0.821
Atp11a	ENSMUSG00000031441	129	-0.29	0.771	0.81
Trim24	ENSMUSG00000029833	147	-0.29	0.773	0.813
Zfp219	ENSMUSG00000049295	104	-0.29	0.775	0.815
Zc3h11a	ENSMUSG00000102976	128	-0.3	0.761	0.8
Jmy	ENSMUSG00000021690	130	-0.31	0.755	0.796
Trim25	ENSMUSG00000000275	154	-0.31	0.76	0.8
Ago2	ENSMUSG00000036698	121	-0.31	0.76	0.8
Mr1	ENSMUSG00000026471	129	-0.32	0.746	0.787
Siah1a	ENSMUSG00000036840	125	-0.32	0.747	0.788
Mical3	ENSMUSG00000051586	67	-0.32	0.75	0.791
Helz	ENSMUSG00000020721	122	-0.33	0.74	0.782
Prdm2	ENSMUSG00000057637	128	-0.34	0.736	0.779
Atp10a	ENSMUSG00000025324	55	-0.35	0.723	0.767
Smarcc2	ENSMUSG00000025369	122	-0.35	0.724	0.768
Gtf2e1	ENSMUSG00000022828	37	-0.35	0.729	0.773
Kat6a	ENSMUSG00000031540	75	-0.36	0.717	0.762
Zbtb11	ENSMUSG00000022601	105	-0.36	0.719	0.764
Itsn1	ENSMUSG00000022957	114	-0.36	0.719	0.764
Taf9b	ENSMUSG00000047242	91	-0.36	0.72	0.764
Sptan1	ENSMUSG00000057738	113	-0.36	0.721	0.765
Gclc	ENSMUSG00000032350	33	-0.37	0.708	0.754
Strn3	ENSMUSG00000020954	115	-0.37	0.713	0.759
Nfe2l2	ENSMUSG00000015839	114	-0.37	0.714	0.76
Polr2a	ENSMUSG00000005198	134	-0.38	0.703	0.75
Mllt10	ENSMUSG00000026743	119	-0.38	0.703	0.75
Nmi	ENSMUSG00000026946	124	-0.38	0.703	0.75
Rasa2	ENSMUSG00000032413	97	-0.38	0.706	0.753
Taf3	ENSMUSG00000025782	137	-0.39	0.693	0.742
Arntl	ENSMUSG00000055116	110	-0.39	0.695	0.744
Zfyve16	ENSMUSG00000021706	45	-0.39	0.698	0.747
Rab3gap2	ENSMUSG00000039318	110	-0.39	0.7	0.748
Ago1	ENSMUSG00000041530	33	-0.39	0.7	0.748
Smarcd2	ENSMUSG00000078619	119	-0.4	0.692	0.742
Ino80b	ENSMUSG00000030034	120	-0.41	0.681	0.731
Prkar2a	ENSMUSG00000032601	115	-0.41	0.681	0.731
Nfasc	ENSMUSG00000026442	130	-0.41	0.684	0.734
Agtrap	ENSMUSG00000029007	117	-0.42	0.676	0.726
Ubl3	ENSMUSG00000001687	112	-0.43	0.665	0.716
Rhoj	ENSMUSG00000046768	111	-0.43	0.668	0.718
Chmp3	ENSMUSG00000053119	110	-0.44	0.658	0.709
Zdhhc8	ENSMUSG00000060166	122	-0.44	0.658	0.709
Sipa1l1	ENSMUSG00000042700	36	-0.44	0.661	0.712
Ano6	ENSMUSG00000064210	111	-0.44	0.661	0.712
Slc7a7	ENSMUSG00000000958	60	-0.45	0.653	0.706
Gdpd2	ENSMUSG00000019359	56	-0.45	0.654	0.706
Safb2	ENSMUSG00000042625	118	-0.45	0.654	0.706
Cnot4	ENSMUSG00000038784	115	-0.45	0.655	0.707
Fam120a	ENSMUSG00000038014	109	-0.46	0.644	0.699
Camkk2	ENSMUSG00000029471	119	-0.46	0.646	0.7
Nfe2l1	ENSMUSG00000038615	114	-0.47	0.64	0.694
Daglb	ENSMUSG00000039206	143	-0.47	0.642	0.696
Gpr153	ENSMUSG00000042804	119	-0.47	0.642	0.696
Mef2c	ENSMUSG00000005583	70	-0.48	0.633	0.688
Nfat5	ENSMUSG00000003847	112	-0.48	0.634	0.689
Cited2	ENSMUSG00000039910	118	-0.48	0.634	0.689
Eps8	ENSMUSG00000015766	117	-0.49	0.623	0.679
Crtc2	ENSMUSG00000027936	41	-0.49	0.625	0.68
Hoxc8	ENSMUSG00000001657	148	-0.5	0.615	0.672
Nln	ENSMUSG00000021710	30	-0.5	0.615	0.672
Ahcyl1	ENSMUSG00000027893	113	-0.5	0.619	0.675
Hoxb4	ENSMUSG00000038692	77	-0.5	0.619	0.675
Ahr	ENSMUSG00000019256	108	-0.51	0.609	0.666
Akap7	ENSMUSG00000039166	34	-0.52	0.601	0.658
Zfx	ENSMUSG00000079509	119	-0.52	0.605	0.662
Slirp	ENSMUSG00000021040	110	-0.53	0.599	0.657
Zfp148	ENSMUSG00000022811	116	-0.54	0.591	0.649
Lpar6	ENSMUSG00000033446	73	-0.55	0.583	0.641
Rac3	ENSMUSG00000018012	134	-0.55	0.585	0.643
Tbp	ENSMUSG00000014767	36	-0.56	0.575	0.634
Tirap	ENSMUSG00000032041	150	-0.57	0.567	0.627
Wwox	ENSMUSG00000004637	109	-0.57	0.571	0.631
Cbr1	ENSMUSG00000051483	111	-0.58	0.562	0.622
Spen	ENSMUSG00000040761	70	-0.59	0.552	0.613
Tnfsf9	ENSMUSG00000035678	131	-0.59	0.555	0.616
Tigd2	ENSMUSG00000049232	138	-0.59	0.555	0.616
Zmynd19	ENSMUSG00000026974	138	-0.59	0.558	0.618
Adora2b	ENSMUSG00000018500	121	-0.6	0.546	0.607
Utrn	ENSMUSG00000019820	125	-0.6	0.546	0.607
Plxnb2	ENSMUSG00000036606	110	-0.6	0.551	0.612
Asph	ENSMUSG00000028207	114	-0.61	0.539	0.6
Zfp260	ENSMUSG00000049421	113	-0.61	0.54	0.601
Ikbkb	ENSMUSG00000031537	125	-0.61	0.543	0.604
Flii	ENSMUSG00000002812	112	-0.62	0.533	0.594
Serinc3	ENSMUSG00000017707	113	-0.62	0.532	0.594
Nfatc4	ENSMUSG00000023411	130	-0.62	0.532	0.594
Ascc3	ENSMUSG00000038774	142	-0.63	0.526	0.587
Rbck1	ENSMUSG00000027466	117	-0.63	0.527	0.589
Crebzf	ENSMUSG00000051451	89	-0.63	0.528	0.589
Daam1	ENSMUSG00000034574	128	-0.63	0.529	0.59
Kdm3a	ENSMUSG00000053470	126	-0.64	0.523	0.586
Baz2b	ENSMUSG00000026987	118	-0.64	0.525	0.587
Ppp1r9b	ENSMUSG00000038976	133	-0.64	0.525	0.587
Wwp1	ENSMUSG00000041058	122	-0.64	0.525	0.587
Fryl	ENSMUSG00000070733	44	-0.65	0.515	0.578
Gnaq	ENSMUSG00000024639	122	-0.65	0.517	0.581
Adam9	ENSMUSG00000031555	113	-0.65	0.518	0.581
Ift57	ENSMUSG00000032965	119	-0.65	0.517	0.581
Zbtb38	ENSMUSG00000040433	111	-0.65	0.517	0.581
Zfp639	ENSMUSG00000027667	116	-0.66	0.509	0.572
Jam2	ENSMUSG00000053062	120	-0.66	0.508	0.572
Zc3h7b	ENSMUSG00000022390	53	-0.66	0.51	0.574
Cdc5l	ENSMUSG00000023932	115	-0.67	0.502	0.565
Hmbox1	ENSMUSG00000021972	76	-0.69	0.491	0.555
Calcoco1	ENSMUSG00000023055	139	-0.69	0.491	0.555
Clock	ENSMUSG00000029238	153	-0.69	0.491	0.555
Iqgap1	ENSMUSG00000030536	116	-0.69	0.493	0.557
Med28	ENSMUSG00000015804	118	-0.7	0.481	0.546
Trip11	ENSMUSG00000021188	115	-0.7	0.481	0.546
Rel	ENSMUSG00000020275	25	-0.7	0.483	0.547
Foxo3	ENSMUSG00000048756	124	-0.7	0.484	0.548
Zfp637	ENSMUSG00000059689	110	-0.7	0.485	0.548
Mef2d	ENSMUSG00000001419	121	-0.71	0.476	0.541
Clcn5	ENSMUSG00000004317	132	-0.71	0.478	0.543
Ghr	ENSMUSG00000055737	122	-0.71	0.48	0.545
Syt11	ENSMUSG00000068923	100	-0.71	0.48	0.545
Arhgef7	ENSMUSG00000031511	135	-0.72	0.469	0.535
Upf3a	ENSMUSG00000038398	125	-0.72	0.469	0.535
Itgb1bp1	ENSMUSG00000062352	116	-0.72	0.47	0.535
Anxa4	ENSMUSG00000029994	112	-0.72	0.472	0.537
Bag3	ENSMUSG00000030847	111	-0.72	0.474	0.539
Rgmb	ENSMUSG00000048027	120	-0.73	0.466	0.531
Nr1d2	ENSMUSG00000021775	132	-0.74	0.457	0.523
Epb41l3	ENSMUSG00000024044	118	-0.74	0.459	0.525
Myd88	ENSMUSG00000032508	110	-0.74	0.46	0.525
Gon4l	ENSMUSG00000054199	149	-0.74	0.459	0.525
Wtip	ENSMUSG00000036459	30	-0.74	0.461	0.526
Atp9b	ENSMUSG00000024566	158	-0.75	0.453	0.519
2019-09-02	ENSMUSG00000026276	115	-0.75	0.453	0.519
Zmym5	ENSMUSG00000040123	121	-0.75	0.453	0.519
Zbtb22	ENSMUSG00000051390	143	-0.75	0.452	0.519
Gypc	ENSMUSG00000090523	146	-0.75	0.455	0.52
Zmat5	ENSMUSG00000009076	123	-0.76	0.447	0.513
Myo6	ENSMUSG00000033577	130	-0.76	0.447	0.513
Hoxa7	ENSMUSG00000038236	128	-0.76	0.447	0.513
Trappc2	ENSMUSG00000079317	120	-0.76	0.447	0.513
Sik1	ENSMUSG00000024042	37	-0.77	0.438	0.506
Zfp62	ENSMUSG00000046311	75	-0.77	0.44	0.507
Prnp	ENSMUSG00000079037	119	-0.77	0.439	0.507
Hcfc2	ENSMUSG00000020246	126	-0.77	0.442	0.508
Rab13	ENSMUSG00000027935	110	-0.77	0.441	0.508
Slc16a2	ENSMUSG00000033965	115	-0.77	0.441	0.508
Stx2	ENSMUSG00000029428	122	-0.77	0.444	0.51
Hsbp1	ENSMUSG00000031839	119	-0.78	0.433	0.501
Esyt1	ENSMUSG00000025366	115	-0.78	0.435	0.503
Gabpb2	ENSMUSG00000038766	51	-0.78	0.435	0.503
Ankzf1	ENSMUSG00000026199	26	-0.78	0.436	0.504
Jade1	ENSMUSG00000025764	123	-0.79	0.428	0.497
Zfand2b	ENSMUSG00000026197	114	-0.79	0.429	0.497
Rlf	ENSMUSG00000049878	137	-0.79	0.429	0.497
Def6	ENSMUSG00000002257	39	-0.79	0.432	0.5
Ash1l	ENSMUSG00000028053	116	-0.8	0.421	0.491
H2-T23	ENSMUSG00000067212	115	-0.8	0.421	0.491
Sema4c	ENSMUSG00000026121	132	-0.8	0.424	0.493
Spred1	ENSMUSG00000027351	120	-0.8	0.424	0.493
Arid4a	ENSMUSG00000048118	119	-0.8	0.423	0.493
Zfp800	ENSMUSG00000039841	38	-0.8	0.425	0.494
Kdm5b	ENSMUSG00000042207	115	-0.8	0.425	0.494
Map3k7	ENSMUSG00000028284	138	-0.81	0.415	0.486
Glmp	ENSMUSG00000001418	109	-0.81	0.417	0.487
Cebpz	ENSMUSG00000024081	117	-0.81	0.418	0.488
Ctcf	ENSMUSG00000005698	123	-0.81	0.42	0.49
Dcxr	ENSMUSG00000039450	128	-0.82	0.41	0.481
Htatsf1	ENSMUSG00000067873	122	-0.82	0.413	0.483
Mafb	ENSMUSG00000074622	58	-0.83	0.406	0.476
Nf1	ENSMUSG00000020716	117	-0.84	0.402	0.472
Pknox1	ENSMUSG00000006705	126	-0.84	0.403	0.473
Syne2	ENSMUSG00000063450	119	-0.85	0.393	0.462
Meis2	ENSMUSG00000027210	112	-0.85	0.395	0.464
Drap1	ENSMUSG00000024914	113	-0.85	0.398	0.467
Tmem219	ENSMUSG00000060538	113	-0.85	0.398	0.467
Usp8	ENSMUSG00000027363	124	-0.86	0.389	0.458
Gtf2i	ENSMUSG00000060261	111	-0.87	0.383	0.452
Phf6	ENSMUSG00000025626	48	-0.87	0.386	0.455
Aebp2	ENSMUSG00000030232	114	-0.87	0.387	0.456
Atp6v1g1	ENSMUSG00000039105	118	-0.88	0.376	0.446
Nfx1	ENSMUSG00000028423	114	-0.88	0.378	0.447
Zfp638	ENSMUSG00000030016	119	-0.88	0.378	0.447
Lmbr1l	ENSMUSG00000022999	122	-0.88	0.379	0.448
Nfkb1	ENSMUSG00000028163	115	-0.88	0.381	0.45
Tead3	ENSMUSG00000002249	75	-0.89	0.371	0.441
Tcea3	ENSMUSG00000001604	112	-0.89	0.373	0.442
Tspan5	ENSMUSG00000028152	113	-0.89	0.373	0.442
Eps15l1	ENSMUSG00000006276	92	-0.89	0.373	0.443
Zc3h13	ENSMUSG00000022000	120	-0.89	0.375	0.445
Mmgt1	ENSMUSG00000061273	47	-0.9	0.367	0.437
Ccna2	ENSMUSG00000027715	146	-0.9	0.37	0.44
Zfp9	ENSMUSG00000072623	127	-0.9	0.37	0.44
Cenpf	ENSMUSG00000026605	95	-0.91	0.361	0.431
Stat6	ENSMUSG00000002147	113	-0.91	0.364	0.435
Tmem50b	ENSMUSG00000022964	128	-0.91	0.364	0.435
Adam17	ENSMUSG00000052593	119	-0.91	0.365	0.435
Atp2b1	ENSMUSG00000019943	112	-0.92	0.358	0.429
Rlim	ENSMUSG00000056537	124	-0.92	0.359	0.429
Fnbp1	ENSMUSG00000075415	124	-0.92	0.359	0.429
Mga	ENSMUSG00000033943	122	-0.92	0.36	0.43
Irf9	ENSMUSG00000002325	129	-0.93	0.35	0.421
Nipa1	ENSMUSG00000047037	50	-0.93	0.351	0.422
Baz1b	ENSMUSG00000002748	121	-0.93	0.352	0.423
Ppp6r3	ENSMUSG00000024908	131	-0.93	0.353	0.423
Ripk1	ENSMUSG00000021408	118	-0.93	0.353	0.424
Zfp580	ENSMUSG00000055633	169	-0.93	0.354	0.424
Tfe3	ENSMUSG00000000134	115	-0.94	0.345	0.416
Frs2	ENSMUSG00000020170	28	-0.94	0.346	0.417
Nfatc3	ENSMUSG00000031902	46	-0.94	0.346	0.417
Cdk8	ENSMUSG00000029635	133	-0.94	0.349	0.419
Cers6	ENSMUSG00000027035	151	-0.94	0.349	0.42
Ccdc88a	ENSMUSG00000032740	116	-0.95	0.341	0.413
Vamp2	ENSMUSG00000020894	117	-0.95	0.343	0.414
Elf2	ENSMUSG00000037174	116	-0.95	0.342	0.414
Irgm1	ENSMUSG00000046879	153	-0.95	0.344	0.415
Rcan1	ENSMUSG00000022951	122	-0.96	0.335	0.407
Rap2b	ENSMUSG00000036894	131	-0.96	0.335	0.407
Rarg	ENSMUSG00000001288	117	-0.96	0.336	0.408
Cldn12	ENSMUSG00000046798	38	-0.96	0.337	0.408
Trabd2b	ENSMUSG00000070867	139	-0.97	0.33	0.402
Wdtc1	ENSMUSG00000037622	127	-0.97	0.331	0.403
Ddit3	ENSMUSG00000025408	125	-0.97	0.332	0.404
Rtf1	ENSMUSG00000027304	116	-0.97	0.332	0.404
Sirt6	ENSMUSG00000034748	59	-0.97	0.334	0.406
H2-Ke6	ENSMUSG00000073422	122	-0.97	0.334	0.406
Stim2	ENSMUSG00000039156	111	-0.98	0.325	0.397
Chd6	ENSMUSG00000057133	139	-0.98	0.326	0.398
Cenpb	ENSMUSG00000068267	114	-0.98	0.327	0.399
Znrd1	ENSMUSG00000036315	111	-0.98	0.33	0.402
Chp1	ENSMUSG00000014077	117	-0.99	0.322	0.394
Gng11	ENSMUSG00000032766	111	-0.99	0.322	0.394
Paf1	ENSMUSG00000003437	117	-0.99	0.322	0.395
Gatad2b	ENSMUSG00000042390	112	-0.99	0.323	0.396
Add1	ENSMUSG00000029106	110	-0.99	0.324	0.397
Slc12a9	ENSMUSG00000037344	28	-0.99	0.324	0.397
Cdk12	ENSMUSG00000003119	117	-1	0.317	0.389
Atf6	ENSMUSG00000026663	127	-1	0.319	0.392
Msl3	ENSMUSG00000031358	118	-1.01	0.31	0.382
Flnb	ENSMUSG00000025278	126	-1.01	0.312	0.384
Orc2	ENSMUSG00000026037	127	-1.01	0.312	0.384
Nmt2	ENSMUSG00000026643	111	-1.01	0.313	0.385
Zfp451	ENSMUSG00000042197	124	-1.02	0.306	0.378
Cxxc1	ENSMUSG00000024560	112	-1.02	0.307	0.38
Tbl1x	ENSMUSG00000025246	118	-1.02	0.308	0.38
Supt16	ENSMUSG00000035726	127	-1.02	0.308	0.38
Kras	ENSMUSG00000030265	118	-1.02	0.308	0.381
Pcgf3	ENSMUSG00000033623	132	-1.02	0.308	0.381
Zfp623	ENSMUSG00000050846	92	-1.02	0.308	0.381
Ppm1a	ENSMUSG00000021096	116	-1.02	0.31	0.382
Supt6	ENSMUSG00000002052	115	-1.03	0.301	0.374
Melk	ENSMUSG00000035683	95	-1.03	0.301	0.374
Mef2a	ENSMUSG00000030557	114	-1.03	0.303	0.376
Sap30l	ENSMUSG00000020519	115	-1.03	0.304	0.377
Mxd3	ENSMUSG00000021485	106	-1.03	0.304	0.377
Plekha1	ENSMUSG00000040268	128	-1.03	0.304	0.377
Nfic	ENSMUSG00000055053	113	-1.03	0.304	0.377
Ephb3	ENSMUSG00000005958	163	-1.04	0.298	0.371
Nup35	ENSMUSG00000026999	151	-1.04	0.299	0.372
Pip4k2a	ENSMUSG00000026737	51	-1.04	0.3	0.373
Ada	ENSMUSG00000017697	48	-1.04	0.301	0.374
Vezf1	ENSMUSG00000018377	118	-1.04	0.3	0.374
1810043G02Rik	ENSMUSG00000020284	134	-1.05	0.292	0.365
Vav2	ENSMUSG00000009621	141	-1.05	0.293	0.366
Cnot1	ENSMUSG00000036550	123	-1.05	0.294	0.368
Atp1b2	ENSMUSG00000041329	132	-1.05	0.294	0.368
Pi4ka	ENSMUSG00000041720	57	-1.05	0.296	0.369
Cad	ENSMUSG00000013629	104	-1.06	0.288	0.362
Zfp644	ENSMUSG00000049606	115	-1.06	0.289	0.362
Nedd1	ENSMUSG00000019988	160	-1.06	0.291	0.365
Htt	ENSMUSG00000029104	119	-1.07	0.283	0.356
Rnf14	ENSMUSG00000060450	116	-1.07	0.283	0.356
Foxm1	ENSMUSG00000001517	60	-1.07	0.286	0.359
Irak1	ENSMUSG00000031392	115	-1.07	0.286	0.359
Ankrd11	ENSMUSG00000035569	114	-1.07	0.287	0.359
Gphn	ENSMUSG00000047454	55	-1.07	0.286	0.359
Nfyb	ENSMUSG00000020248	113	-1.08	0.281	0.353
Tm7sf3	ENSMUSG00000040234	111	-1.08	0.281	0.353
Ptp4a3	ENSMUSG00000059895	118	-1.08	0.282	0.354
Sec16a	ENSMUSG00000026924	123	-1.09	0.275	0.347
Stoml1	ENSMUSG00000032333	129	-1.09	0.275	0.347
Orai1	ENSMUSG00000049686	145	-1.09	0.275	0.347
Zfp672	ENSMUSG00000049755	120	-1.09	0.274	0.347
Cdk7	ENSMUSG00000069089	112	-1.09	0.274	0.347
Rp2	ENSMUSG00000060090	129	-1.09	0.277	0.349
Tpcn2	ENSMUSG00000048677	137	-1.09	0.277	0.35
Ccny	ENSMUSG00000024286	120	-1.1	0.269	0.342
Sox9	ENSMUSG00000000567	127	-1.1	0.27	0.343
Arhgap17	ENSMUSG00000030766	125	-1.1	0.27	0.343
Vopp1	ENSMUSG00000037788	106	-1.1	0.27	0.343
Ing5	ENSMUSG00000026283	54	-1.1	0.273	0.347
Gcc1	ENSMUSG00000029708	32	-1.11	0.265	0.338
E2f6	ENSMUSG00000057469	100	-1.11	0.265	0.338
Mdm2	ENSMUSG00000020184	120	-1.11	0.267	0.34
Yeats4	ENSMUSG00000020171	115	-1.11	0.268	0.341
Rit1	ENSMUSG00000028057	111	-1.11	0.269	0.342
Dr1	ENSMUSG00000029265	112	-1.12	0.262	0.334
Jam3	ENSMUSG00000031990	116	-1.12	0.261	0.334
Pja2	ENSMUSG00000024083	112	-1.12	0.264	0.336
Elf4	ENSMUSG00000031103	137	-1.12	0.264	0.336
Zfand3	ENSMUSG00000044477	111	-1.12	0.263	0.336
Lmbrd1	ENSMUSG00000073725	109	-1.12	0.264	0.336
Abcc1	ENSMUSG00000023088	138	-1.13	0.257	0.33
Cbl	ENSMUSG00000034342	110	-1.13	0.258	0.331
Mapk8ip1	ENSMUSG00000027223	135	-1.13	0.259	0.332
Cdk11b	ENSMUSG00000029062	114	-1.13	0.259	0.332
Prkci	ENSMUSG00000037643	100	-1.14	0.253	0.325
Hscb	ENSMUSG00000043510	136	-1.14	0.255	0.327
Sp3	ENSMUSG00000027109	111	-1.15	0.249	0.321
Slc7a6	ENSMUSG00000031904	116	-1.15	0.249	0.321
Magt1	ENSMUSG00000031232	109	-1.15	0.251	0.323
Maff	ENSMUSG00000042622	115	-1.16	0.245	0.316
Nsmce3	ENSMUSG00000070520	114	-1.16	0.245	0.316
Ring1	ENSMUSG00000024325	120	-1.16	0.246	0.317
Zfp414	ENSMUSG00000073423	112	-1.17	0.241	0.312
Smad5	ENSMUSG00000021540	116	-1.17	0.242	0.313
Ssh1	ENSMUSG00000042121	125	-1.18	0.236	0.306
Supt5	ENSMUSG00000003435	114	-1.18	0.238	0.308
Mark3	ENSMUSG00000007411	110	-1.18	0.24	0.31
Kdm4a	ENSMUSG00000033326	90	-1.18	0.24	0.31
Nae1	ENSMUSG00000031878	116	-1.19	0.233	0.302
Atrx	ENSMUSG00000031229	110	-1.19	0.234	0.304
Rif1	ENSMUSG00000036202	65	-1.19	0.234	0.304
E2f1	ENSMUSG00000027490	130	-1.19	0.235	0.305
Ncor2	ENSMUSG00000029478	117	-1.19	0.235	0.305
Dgkz	ENSMUSG00000040479	130	-1.19	0.235	0.305
Mark2	ENSMUSG00000024969	116	-1.19	0.236	0.306
Ephb4	ENSMUSG00000029710	160	-1.2	0.229	0.299
Tcf12	ENSMUSG00000032228	115	-1.2	0.23	0.3
Slc2a8	ENSMUSG00000026791	134	-1.2	0.231	0.301
Ubn1	ENSMUSG00000039473	119	-1.2	0.231	0.301
Zfp24	ENSMUSG00000051469	102	-1.2	0.232	0.301
Slc1a5	ENSMUSG00000001918	119	-1.21	0.227	0.296
Zkscan17	ENSMUSG00000020472	137	-1.21	0.226	0.296
Trip4	ENSMUSG00000032386	117	-1.21	0.227	0.296
Kmt5c	ENSMUSG00000059851	65	-1.21	0.226	0.296
Zdhhc13	ENSMUSG00000030471	121	-1.21	0.228	0.297
Tapbpl	ENSMUSG00000038213	139	-1.21	0.227	0.297
Bbs5	ENSMUSG00000063145	105	-1.21	0.228	0.298
Neu1	ENSMUSG00000007038	130	-1.22	0.223	0.293
Vgll4	ENSMUSG00000030315	115	-1.22	0.224	0.294
Zfp740	ENSMUSG00000046897	127	-1.22	0.224	0.294
Scand1	ENSMUSG00000046229	110	-1.23	0.217	0.286
Clcn3	ENSMUSG00000004319	143	-1.23	0.219	0.288
Mbd1	ENSMUSG00000024561	130	-1.23	0.219	0.288
Krit1	ENSMUSG00000000600	117	-1.23	0.22	0.289
Cdc42bpb	ENSMUSG00000021279	137	-1.23	0.22	0.289
Maf1	ENSMUSG00000022553	111	-1.23	0.22	0.289
Rock1	ENSMUSG00000024290	114	-1.23	0.22	0.289
Smarcd1	ENSMUSG00000023018	140	-1.24	0.213	0.282
Slc11a2	ENSMUSG00000023030	132	-1.24	0.213	0.282
Magee1	ENSMUSG00000031227	129	-1.24	0.215	0.284
Nacc2	ENSMUSG00000026932	134	-1.24	0.216	0.285
Rftn1	ENSMUSG00000039316	119	-1.24	0.216	0.285
Mmgt2	ENSMUSG00000048497	139	-1.24	0.216	0.285
Mtf1	ENSMUSG00000028890	112	-1.24	0.217	0.286
Crlf3	ENSMUSG00000017561	90	-1.25	0.21	0.278
Zfp821	ENSMUSG00000031728	27	-1.25	0.211	0.279
Efr3a	ENSMUSG00000015002	110	-1.25	0.212	0.281
Agpat3	ENSMUSG00000001211	118	-1.26	0.207	0.276
Dlg1	ENSMUSG00000022770	144	-1.26	0.207	0.276
Nlgn2	ENSMUSG00000051790	124	-1.26	0.208	0.276
Gabpa	ENSMUSG00000008976	119	-1.26	0.209	0.277
Ubp1	ENSMUSG00000009741	115	-1.26	0.208	0.277
Epc1	ENSMUSG00000024240	144	-1.27	0.203	0.271
Zkscan1	ENSMUSG00000029729	86	-1.27	0.203	0.271
Nfatc1	ENSMUSG00000033016	90	-1.27	0.205	0.273
Atxn1	ENSMUSG00000046876	119	-1.27	0.205	0.273
Nfil3	ENSMUSG00000056749	111	-1.27	0.204	0.273
Myadm	ENSMUSG00000068566	113	-1.27	0.205	0.273
Atp6v1c1	ENSMUSG00000022295	122	-1.28	0.201	0.268
Zcrb1	ENSMUSG00000022635	116	-1.28	0.2	0.268
Tpcn1	ENSMUSG00000032741	60	-1.29	0.196	0.264
Zfp560	ENSMUSG00000045519	114	-1.29	0.196	0.264
Esyt2	ENSMUSG00000021171	113	-1.29	0.198	0.265
Ebag9	ENSMUSG00000022339	118	-1.29	0.198	0.265
Tmf1	ENSMUSG00000030059	116	-1.29	0.197	0.265
Nr2f2	ENSMUSG00000030551	115	-1.29	0.198	0.265
Ncoa5	ENSMUSG00000039804	130	-1.29	0.198	0.265
Bcl3	ENSMUSG00000053175	116	-1.29	0.198	0.266
Atp6v0a1	ENSMUSG00000019302	135	-1.3	0.193	0.261
Rasa1	ENSMUSG00000021549	120	-1.3	0.193	0.261
Cep89	ENSMUSG00000023072	146	-1.3	0.193	0.261
Zfp106	ENSMUSG00000027288	117	-1.3	0.193	0.261
Emp1	ENSMUSG00000030208	112	-1.3	0.193	0.261
Flcn	ENSMUSG00000032633	136	-1.3	0.192	0.261
Kdm1a	ENSMUSG00000036940	118	-1.3	0.194	0.261
Cir1	ENSMUSG00000041777	110	-1.3	0.194	0.261
Slc39a3	ENSMUSG00000046822	135	-1.3	0.193	0.261
Rbm15	ENSMUSG00000048109	140	-1.3	0.193	0.261
Zbtb8os	ENSMUSG00000057572	114	-1.3	0.193	0.261
Zfp703	ENSMUSG00000085795	28	-1.3	0.194	0.261
Mphosph8	ENSMUSG00000079184	119	-1.3	0.194	0.262
B4galt1	ENSMUSG00000028413	113	-1.31	0.189	0.258
Slc41a2	ENSMUSG00000034591	35	-1.31	0.189	0.258
Best1	ENSMUSG00000037418	134	-1.31	0.189	0.258
Cnot6	ENSMUSG00000020362	115	-1.31	0.19	0.259
Cd200	ENSMUSG00000022661	113	-1.31	0.19	0.259
Arrdc1	ENSMUSG00000026972	150	-1.31	0.191	0.259
Prc1	ENSMUSG00000038943	139	-1.31	0.19	0.259
Kdm5a	ENSMUSG00000030180	112	-1.31	0.191	0.26
Cd99l2	ENSMUSG00000035776	125	-1.31	0.192	0.26
Flot2	ENSMUSG00000061981	109	-1.32	0.185	0.253
Zfp652	ENSMUSG00000075595	120	-1.32	0.187	0.256
Tonsl	ENSMUSG00000059323	111	-1.32	0.188	0.257
Zfc3h1	ENSMUSG00000034163	133	-1.33	0.182	0.25
Crk	ENSMUSG00000017776	108	-1.33	0.183	0.251
Gsk3b	ENSMUSG00000022812	110	-1.33	0.184	0.251
Vasn	ENSMUSG00000039646	109	-1.33	0.183	0.251
Cnot3	ENSMUSG00000035632	112	-1.33	0.185	0.253
Srsf10	ENSMUSG00000028676	112	-1.34	0.18	0.247
Cyld	ENSMUSG00000036712	150	-1.34	0.179	0.247
Nckap1	ENSMUSG00000027002	108	-1.34	0.18	0.248
Csde1	ENSMUSG00000068823	114	-1.34	0.18	0.248
Trim33	ENSMUSG00000033014	112	-1.34	0.181	0.249
Nelfb	ENSMUSG00000013465	120	-1.35	0.176	0.244
Smurf1	ENSMUSG00000038780	43	-1.35	0.177	0.244
Apc	ENSMUSG00000005871	134	-1.35	0.178	0.246
Kdm5c	ENSMUSG00000025332	137	-1.35	0.178	0.246
Elp4	ENSMUSG00000027167	127	-1.35	0.178	0.246
Aktip	ENSMUSG00000031667	119	-1.35	0.178	0.246
Vcam1	ENSMUSG00000027962	117	-1.36	0.172	0.239
Zmym3	ENSMUSG00000031310	54	-1.36	0.174	0.241
Sulf1	ENSMUSG00000016918	111	-1.36	0.174	0.242
Cd1d1	ENSMUSG00000028076	148	-1.36	0.174	0.242
Trp53i13	ENSMUSG00000044328	117	-1.36	0.175	0.243
Atp1b3	ENSMUSG00000032412	111	-1.37	0.17	0.236
Foxp1	ENSMUSG00000030067	114	-1.37	0.172	0.239
Pycard	ENSMUSG00000030793	111	-1.38	0.168	0.234
Atad1	ENSMUSG00000013662	113	-1.39	0.164	0.229
Jun	ENSMUSG00000052684	478	-1.39	0.164	0.229
Icmt	ENSMUSG00000039662	106	-1.39	0.164	0.23
Phtf1	ENSMUSG00000058388	127	-1.39	0.165	0.23
Pacsin2	ENSMUSG00000016664	117	-1.39	0.165	0.231
Smarcad1	ENSMUSG00000029920	131	-1.39	0.166	0.231
Capn1	ENSMUSG00000024942	120	-1.4	0.16	0.225
Ercc3	ENSMUSG00000024382	135	-1.4	0.163	0.227
Scmh1	ENSMUSG00000000085	125	-1.41	0.158	0.222
Tsc22d2	ENSMUSG00000027806	112	-1.41	0.157	0.222
Zranb1	ENSMUSG00000030967	125	-1.41	0.158	0.222
Ddx58	ENSMUSG00000040296	143	-1.41	0.157	0.222
Ubqln2	ENSMUSG00000050148	117	-1.41	0.157	0.222
Coprs	ENSMUSG00000031458	100	-1.41	0.159	0.223
Irak1bp1	ENSMUSG00000032251	121	-1.41	0.158	0.223
Ctnnd1	ENSMUSG00000034101	119	-1.41	0.159	0.223
Nsd1	ENSMUSG00000021488	119	-1.41	0.16	0.224
Ncor1	ENSMUSG00000018501	122	-1.42	0.154	0.219
Rest	ENSMUSG00000029249	111	-1.42	0.154	0.219
Gria3	ENSMUSG00000001986	135	-1.42	0.155	0.22
Slc9a1	ENSMUSG00000028854	129	-1.42	0.156	0.22
Klhl7	ENSMUSG00000028986	136	-1.42	0.155	0.22
Arid5a	ENSMUSG00000037447	132	-1.42	0.155	0.22
Purb	ENSMUSG00000094483	113	-1.42	0.156	0.22
Mmp19	ENSMUSG00000025355	111	-1.42	0.157	0.221
Cul5	ENSMUSG00000032030	119	-1.43	0.152	0.216
Zc3h7a	ENSMUSG00000037965	118	-1.43	0.152	0.217
Zfp622	ENSMUSG00000052253	109	-1.43	0.152	0.217
Tcerg1	ENSMUSG00000024498	113	-1.43	0.153	0.218
Cln3	ENSMUSG00000030720	121	-1.43	0.154	0.218
Pias1	ENSMUSG00000032405	116	-1.43	0.154	0.218
Cdc42ep2	ENSMUSG00000045664	132	-1.43	0.153	0.218
Pick1	ENSMUSG00000068206	28	-1.43	0.154	0.218
Tbc1d10b	ENSMUSG00000042492	148	-1.43	0.154	0.219
Mgrn1	ENSMUSG00000022517	113	-1.44	0.149	0.213
Atf1	ENSMUSG00000023027	123	-1.44	0.149	0.214
Vcl	ENSMUSG00000021823	122	-1.44	0.15	0.215
Nr4a2	ENSMUSG00000026826	134	-1.44	0.151	0.215
Ppie	ENSMUSG00000028651	113	-1.44	0.15	0.215
Casp8ap2	ENSMUSG00000028282	148	-1.45	0.146	0.21
Glrx2	ENSMUSG00000018196	118	-1.45	0.146	0.211
Bmpr1a	ENSMUSG00000021796	111	-1.45	0.147	0.211
Gtf2h5	ENSMUSG00000034345	113	-1.45	0.147	0.211
Zfyve19	ENSMUSG00000068580	136	-1.45	0.147	0.211
Il2	ENSMUSG00000027720	152	-1.45	0.147	0.212
Atp11b	ENSMUSG00000037400	124	-1.45	0.147	0.212
Lin7c	ENSMUSG00000027162	112	-1.46	0.144	0.208
Fbxw7	ENSMUSG00000028086	53	-1.46	0.144	0.208
Daxx	ENSMUSG00000002307	114	-1.47	0.141	0.205
Pde4d	ENSMUSG00000021699	86	-1.47	0.142	0.205
Wiz	ENSMUSG00000024050	48	-1.47	0.142	0.205
Zfp91	ENSMUSG00000024695	111	-1.47	0.141	0.205
Hlx	ENSMUSG00000039377	130	-1.47	0.141	0.205
Marveld1	ENSMUSG00000044345	124	-1.47	0.141	0.205
Churc1	ENSMUSG00000090258	109	-1.47	0.142	0.205
Plrg1	ENSMUSG00000027998	117	-1.47	0.143	0.206
Zxdc	ENSMUSG00000034430	90	-1.48	0.138	0.201
Zdhhc3	ENSMUSG00000025786	119	-1.48	0.138	0.202
Zfp326	ENSMUSG00000029290	118	-1.48	0.139	0.202
Mfsd5	ENSMUSG00000045665	116	-1.48	0.139	0.203
2610301B20Rik	ENSMUSG00000059482	142	-1.48	0.14	0.204
Flot1	ENSMUSG00000059714	116	-1.48	0.14	0.204
Pqbp1	ENSMUSG00000031157	113	-1.49	0.135	0.198
Tbc1d10a	ENSMUSG00000034412	119	-1.49	0.135	0.198
Pip5k1a	ENSMUSG00000028126	113	-1.49	0.136	0.199
Epn1	ENSMUSG00000035203	110	-1.49	0.136	0.199
Icam1	ENSMUSG00000037405	118	-1.49	0.137	0.2
Fkrp	ENSMUSG00000048920	133	-1.49	0.137	0.2
Gnai1	ENSMUSG00000057614	37	-1.49	0.137	0.2
Eaf1	ENSMUSG00000021890	139	-1.49	0.138	0.201
Slc46a1	ENSMUSG00000020829	26	-1.5	0.133	0.196
Ptpn13	ENSMUSG00000034573	134	-1.5	0.133	0.196
Smpd1	ENSMUSG00000037049	112	-1.5	0.133	0.196
Atp6v1b2	ENSMUSG00000006273	114	-1.5	0.134	0.197
Rilpl1	ENSMUSG00000029392	113	-1.5	0.134	0.197
Taf13	ENSMUSG00000048100	115	-1.5	0.134	0.197
Zfp825	ENSMUSG00000069208	142	-1.5	0.134	0.197
Rab9	ENSMUSG00000079316	116	-1.5	0.134	0.197
S1pr2	ENSMUSG00000043895	117	-1.5	0.135	0.198
Hoxc6	ENSMUSG00000001661	149	-1.51	0.131	0.194
Dedd	ENSMUSG00000013973	86	-1.51	0.131	0.194
Lrig3	ENSMUSG00000020105	149	-1.51	0.131	0.194
Hoxc10	ENSMUSG00000022484	54	-1.51	0.131	0.194
Slc39a6	ENSMUSG00000024270	117	-1.51	0.131	0.194
Setd2	ENSMUSG00000044791	122	-1.51	0.131	0.194
Zc3h3	ENSMUSG00000075600	54	-1.51	0.131	0.194
Asf1b	ENSMUSG00000005470	122	-1.51	0.132	0.195
Carhsp1	ENSMUSG00000008393	120	-1.52	0.128	0.191
Jak2	ENSMUSG00000024789	121	-1.52	0.128	0.191
Cggbp1	ENSMUSG00000054604	114	-1.52	0.128	0.191
Tead1	ENSMUSG00000055320	119	-1.52	0.128	0.191
Stau1	ENSMUSG00000039536	112	-1.52	0.129	0.192
Sltm	ENSMUSG00000032212	116	-1.52	0.13	0.193
Snap29	ENSMUSG00000022765	135	-1.53	0.125	0.187
Arid5b	ENSMUSG00000019947	110	-1.53	0.125	0.188
Tulp4	ENSMUSG00000034377	112	-1.53	0.125	0.188
Slc41a1	ENSMUSG00000013275	80	-1.53	0.126	0.189
Ehd4	ENSMUSG00000027293	127	-1.53	0.126	0.189
Mcmbp	ENSMUSG00000048170	129	-1.53	0.126	0.189
Asf1a	ENSMUSG00000019857	123	-1.53	0.127	0.19
Zmynd11	ENSMUSG00000021156	113	-1.53	0.127	0.19
Wwtr1	ENSMUSG00000027803	110	-1.54	0.123	0.185
Htatip2	ENSMUSG00000039745	112	-1.54	0.123	0.185
Tcirg1	ENSMUSG00000001750	125	-1.54	0.124	0.186
Med16	ENSMUSG00000013833	128	-1.54	0.124	0.186
Hbp1	ENSMUSG00000002996	117	-1.54	0.124	0.187
Lmo4	ENSMUSG00000028266	111	-1.54	0.124	0.187
Baz2a	ENSMUSG00000040054	139	-1.54	0.124	0.187
Pygl	ENSMUSG00000021069	116	-1.55	0.12	0.182
Stambp	ENSMUSG00000006906	142	-1.55	0.121	0.183
Med1	ENSMUSG00000018160	117	-1.55	0.122	0.184
Mafk	ENSMUSG00000018143	131	-1.55	0.122	0.185
Zc3h15	ENSMUSG00000027091	120	-1.56	0.119	0.181
Prrx2	ENSMUSG00000039476	111	-1.56	0.12	0.181
Tpra1	ENSMUSG00000002871	106	-1.57	0.116	0.176
Gpsm1	ENSMUSG00000026930	98	-1.57	0.117	0.178
Ptpra	ENSMUSG00000027303	109	-1.57	0.117	0.178
Zfp516	ENSMUSG00000058881	120	-1.57	0.117	0.178
Shc1	ENSMUSG00000042626	112	-1.58	0.113	0.173
Atp6v1a	ENSMUSG00000052459	117	-1.58	0.113	0.173
Hipk1	ENSMUSG00000008730	135	-1.58	0.114	0.174
Zfyve21	ENSMUSG00000021286	111	-1.58	0.114	0.174
Rhob	ENSMUSG00000054364	120	-1.58	0.114	0.174
Exoc7	ENSMUSG00000020792	118	-1.58	0.115	0.176
Nvl	ENSMUSG00000026516	155	-1.58	0.115	0.176
Rab3a	ENSMUSG00000031840	152	-1.58	0.115	0.176
Pias2	ENSMUSG00000025423	115	-1.59	0.111	0.17
Uimc1	ENSMUSG00000025878	116	-1.59	0.111	0.17
Raf1	ENSMUSG00000000441	110	-1.59	0.112	0.172
Zfr	ENSMUSG00000022201	116	-1.59	0.112	0.172
Zfp358	ENSMUSG00000047264	114	-1.59	0.112	0.172
Zfp664	ENSMUSG00000079215	124	-1.59	0.112	0.172
Dlg4	ENSMUSG00000020886	123	-1.59	0.113	0.173
Klf11	ENSMUSG00000020653	108	-1.6	0.109	0.168
Mcm6	ENSMUSG00000026355	126	-1.6	0.109	0.168
Ramp1	ENSMUSG00000034353	69	-1.6	0.109	0.168
Mov10	ENSMUSG00000002227	122	-1.6	0.11	0.169
Cbx5	ENSMUSG00000009575	109	-1.6	0.109	0.169
Dcaf6	ENSMUSG00000026571	54	-1.6	0.11	0.169
Erlin2	ENSMUSG00000031483	134	-1.6	0.11	0.169
Tob1	ENSMUSG00000037573	114	-1.6	0.109	0.169
Dnttip2	ENSMUSG00000039756	114	-1.6	0.109	0.169
Glg1	ENSMUSG00000003316	119	-1.61	0.106	0.166
Mfap3	ENSMUSG00000020522	137	-1.61	0.107	0.166
Acad8	ENSMUSG00000031969	120	-1.61	0.107	0.166
Zbtb21	ENSMUSG00000046962	139	-1.61	0.106	0.166
Enah	ENSMUSG00000022995	118	-1.61	0.108	0.167
Spred2	ENSMUSG00000045671	148	-1.61	0.108	0.167
Chd4	ENSMUSG00000063870	111	-1.61	0.107	0.167
Lrrc8a	ENSMUSG00000007476	126	-1.61	0.108	0.168
Nelfcd	ENSMUSG00000016253	124	-1.62	0.106	0.165
Dnmt3a	ENSMUSG00000020661	118	-1.62	0.106	0.165
Sorbs3	ENSMUSG00000022091	123	-1.63	0.102	0.16
Rbsn	ENSMUSG00000014550	138	-1.63	0.103	0.161
Cenpk	ENSMUSG00000021714	38	-1.63	0.103	0.161
Il1r2	ENSMUSG00000026073	145	-1.63	0.103	0.161
Ilf3	ENSMUSG00000032178	118	-1.63	0.103	0.161
Nacc1	ENSMUSG00000001910	125	-1.63	0.104	0.162
Arl6	ENSMUSG00000022722	116	-1.64	0.1	0.157
Phf10	ENSMUSG00000023883	118	-1.64	0.101	0.158
Zfp410	ENSMUSG00000042472	146	-1.64	0.101	0.158
Morc3	ENSMUSG00000039456	129	-1.64	0.101	0.159
Erc1	ENSMUSG00000030172	113	-1.65	0.0982	0.155
Pip5k1c	ENSMUSG00000034902	99	-1.65	0.0981	0.155
Furin	ENSMUSG00000030530	113	-1.65	0.0987	0.156
Terf2ip	ENSMUSG00000033430	147	-1.65	0.0986	0.156
Smad6	ENSMUSG00000036867	91	-1.65	0.0985	0.156
Pttg1	ENSMUSG00000020415	113	-1.65	0.0998	0.157
Bcl9l	ENSMUSG00000063382	102	-1.65	0.0995	0.157
Lztr1	ENSMUSG00000022761	115	-1.66	0.0964	0.153
H2-T22	ENSMUSG00000056116	108	-1.66	0.0962	0.153
Gtf2ird1	ENSMUSG00000023079	118	-1.66	0.097	0.154
Yipf3	ENSMUSG00000071074	115	-1.66	0.0976	0.154
Znhit2	ENSMUSG00000075227	145	-1.66	0.0974	0.154
Rab5b	ENSMUSG00000000711	129	-1.67	0.0951	0.151
Rab10	ENSMUSG00000020671	115	-1.67	0.0946	0.151
Ccnl2	ENSMUSG00000029068	112	-1.68	0.0922	0.148
Hcfc1	ENSMUSG00000031386	112	-1.68	0.0925	0.148
Cnp	ENSMUSG00000006782	129	-1.68	0.0929	0.149
Top2a	ENSMUSG00000020914	123	-1.68	0.0931	0.149
Mpp5	ENSMUSG00000021112	131	-1.68	0.0928	0.149
Suclg2	ENSMUSG00000061838	116	-1.68	0.0935	0.149
Ing2	ENSMUSG00000063049	110	-1.68	0.0935	0.149
Etnk1	ENSMUSG00000030275	118	-1.68	0.0938	0.15
Enpp4	ENSMUSG00000023961	57	-1.69	0.0902	0.145
Stat3	ENSMUSG00000004040	112	-1.69	0.0912	0.146
Trib1	ENSMUSG00000032501	113	-1.69	0.0911	0.146
Taf10	ENSMUSG00000043866	111	-1.69	0.0908	0.146
Fen1	ENSMUSG00000024742	57	-1.69	0.0915	0.147
Usp16	ENSMUSG00000025616	113	-1.7	0.0887	0.143
Tfb2m	ENSMUSG00000026492	101	-1.7	0.0887	0.143
Zbtb1	ENSMUSG00000033454	116	-1.7	0.0884	0.143
Zfp422	ENSMUSG00000059878	124	-1.7	0.0886	0.143
Scap	ENSMUSG00000032485	116	-1.7	0.0893	0.144
Evc2	ENSMUSG00000050248	139	-1.7	0.0893	0.144
Slc52a2	ENSMUSG00000022560	122	-1.7	0.0899	0.145
Mier2	ENSMUSG00000042570	67	-1.7	0.0897	0.145
Deaf1	ENSMUSG00000058886	144	-1.7	0.09	0.145
Csf2ra	ENSMUSG00000059326	139	-1.7	0.0897	0.145
Il17rc	ENSMUSG00000030281	115	-1.71	0.0864	0.14
Pbrm1	ENSMUSG00000042323	117	-1.71	0.0863	0.14
Nif3l1	ENSMUSG00000026036	125	-1.71	0.0874	0.142
Zfp524	ENSMUSG00000051184	150	-1.71	0.0874	0.142
Gopc	ENSMUSG00000019861	127	-1.72	0.0847	0.138
Arl13b	ENSMUSG00000022911	122	-1.72	0.0848	0.138
Nod1	ENSMUSG00000038058	111	-1.72	0.0846	0.138
Med27	ENSMUSG00000026799	121	-1.72	0.0852	0.139
Kdm2b	ENSMUSG00000029475	142	-1.73	0.0828	0.136
Prpf6	ENSMUSG00000002455	122	-1.73	0.0835	0.137
Ssbp2	ENSMUSG00000003992	115	-1.73	0.0835	0.137
Arhgef25	ENSMUSG00000019467	113	-1.73	0.083	0.137
Dbi	ENSMUSG00000026385	116	-1.73	0.0833	0.137
Stom	ENSMUSG00000026880	61	-1.73	0.0834	0.137
Taf12	ENSMUSG00000028899	113	-1.73	0.0836	0.137
Sfswap	ENSMUSG00000029439	149	-1.73	0.0839	0.137
Rell1	ENSMUSG00000047881	129	-1.73	0.0835	0.137
Dzip3	ENSMUSG00000064061	136	-1.73	0.0839	0.137
Nsmf	ENSMUSG00000006476	130	-1.73	0.0841	0.138
Mta1	ENSMUSG00000021144	132	-1.73	0.0842	0.138
Zdhhc4	ENSMUSG00000001844	114	-1.74	0.0815	0.135
Homer1	ENSMUSG00000007617	133	-1.74	0.0819	0.135
Atf2	ENSMUSG00000027104	122	-1.74	0.0816	0.135
Cnot9	ENSMUSG00000026174	34	-1.74	0.0826	0.136
Zcchc8	ENSMUSG00000029427	128	-1.74	0.0825	0.136
Rnf6	ENSMUSG00000029634	110	-1.74	0.0826	0.136
Ccnh	ENSMUSG00000021548	110	-1.75	0.0793	0.132
Snapc3	ENSMUSG00000028483	123	-1.75	0.0793	0.132
Snx9	ENSMUSG00000002365	115	-1.75	0.0799	0.133
Tle1	ENSMUSG00000008305	114	-1.75	0.0803	0.133
Hif1a	ENSMUSG00000021109	116	-1.75	0.0798	0.133
Vegfa	ENSMUSG00000023951	132	-1.75	0.0795	0.133
Ptpn2	ENSMUSG00000024539	114	-1.75	0.0801	0.133
Terf1	ENSMUSG00000025925	134	-1.75	0.0803	0.133
Adcy7	ENSMUSG00000031659	141	-1.75	0.0799	0.133
Pxk	ENSMUSG00000033885	120	-1.75	0.0796	0.133
Trpm7	ENSMUSG00000027365	114	-1.75	0.0809	0.134
Xrn2	ENSMUSG00000027433	112	-1.75	0.0807	0.134
Grb2	ENSMUSG00000059923	110	-1.75	0.0809	0.134
Rab4a	ENSMUSG00000019478	113	-1.76	0.0782	0.131
Wnt5a	ENSMUSG00000021994	120	-1.76	0.0781	0.131
Gbf1	ENSMUSG00000025224	121	-1.76	0.0778	0.131
Kdm2a	ENSMUSG00000054611	122	-1.76	0.0783	0.131
Usf2	ENSMUSG00000058239	114	-1.76	0.0778	0.131
Hat1	ENSMUSG00000027018	115	-1.76	0.079	0.132
Adgrg2	ENSMUSG00000031298	86	-1.76	0.0788	0.132
Emp3	ENSMUSG00000040212	129	-1.76	0.0787	0.132
Mta2	ENSMUSG00000071646	115	-1.76	0.0792	0.132
Nolc1	ENSMUSG00000015176	116	-1.77	0.0761	0.129
Arsa	ENSMUSG00000022620	118	-1.77	0.0764	0.129
Pskh1	ENSMUSG00000048310	151	-1.77	0.0763	0.129
Dbnl	ENSMUSG00000020476	113	-1.77	0.0772	0.13
Ppp1r16a	ENSMUSG00000033819	142	-1.77	0.0773	0.13
Trps1	ENSMUSG00000038679	113	-1.77	0.0769	0.13
Flywch1	ENSMUSG00000040097	119	-1.77	0.0775	0.13
Chd8	ENSMUSG00000053754	134	-1.77	0.0775	0.13
Zfp503	ENSMUSG00000039081	110	-1.78	0.0743	0.126
Dlgap4	ENSMUSG00000061689	110	-1.78	0.0749	0.127
Nrbf2	ENSMUSG00000075000	117	-1.78	0.0746	0.127
Pld2	ENSMUSG00000020828	128	-1.79	0.0732	0.125
Prmt6	ENSMUSG00000049300	36	-1.79	0.0739	0.126
Cptp	ENSMUSG00000029073	109	-1.8	0.0719	0.123
Dxo	ENSMUSG00000040482	125	-1.8	0.0718	0.123
Creg1	ENSMUSG00000040713	121	-1.8	0.072	0.123
Ap2a1	ENSMUSG00000060279	122	-1.8	0.0717	0.123
Ap2a2	ENSMUSG00000002957	109	-1.81	0.0704	0.121
Ndrg1	ENSMUSG00000005125	133	-1.81	0.0704	0.121
Zswim7	ENSMUSG00000014243	118	-1.81	0.0703	0.121
Tmem47	ENSMUSG00000025666	129	-1.81	0.0702	0.121
Eps15	ENSMUSG00000028552	124	-1.81	0.0708	0.121
Map4	ENSMUSG00000032479	113	-1.81	0.0706	0.121
Phlda1	ENSMUSG00000020205	120	-1.81	0.071	0.122
Slmap	ENSMUSG00000021870	115	-1.81	0.071	0.122
Pard6a	ENSMUSG00000005699	132	-1.82	0.0684	0.119
Nup85	ENSMUSG00000020739	128	-1.82	0.0687	0.119
Uri1	ENSMUSG00000030421	122	-1.82	0.0693	0.119
Nipa2	ENSMUSG00000030452	121	-1.82	0.0692	0.119
H2-Aa	ENSMUSG00000036594	26	-1.82	0.0686	0.119
Ascc1	ENSMUSG00000044475	113	-1.82	0.0693	0.119
Polr2k	ENSMUSG00000045996	113	-1.82	0.0685	0.119
Hoxb2	ENSMUSG00000075588	114	-1.82	0.0686	0.119
Ccdc59	ENSMUSG00000019897	113	-1.83	0.0667	0.116
Capn10	ENSMUSG00000026270	119	-1.83	0.067	0.116
Rab35	ENSMUSG00000029518	118	-1.83	0.0672	0.116
Tcaf1	ENSMUSG00000036667	131	-1.83	0.0666	0.116
Zfp444	ENSMUSG00000044876	141	-1.83	0.0678	0.117
Cldn15	ENSMUSG00000001739	76	-1.84	0.0653	0.114
Habp4	ENSMUSG00000021476	124	-1.84	0.0656	0.114
Zcchc9	ENSMUSG00000021621	117	-1.84	0.0652	0.114
Ppp1r8	ENSMUSG00000028882	112	-1.84	0.0655	0.114
Gatad2a	ENSMUSG00000036180	117	-1.84	0.0653	0.114
Pak1ip1	ENSMUSG00000038683	112	-1.84	0.0653	0.114
Cers5	ENSMUSG00000023021	114	-1.84	0.0659	0.115
Dpf2	ENSMUSG00000024826	119	-1.84	0.066	0.115
Ing1	ENSMUSG00000045969	120	-1.84	0.0662	0.115
Maea	ENSMUSG00000079562	109	-1.84	0.0661	0.115
Map4k5	ENSMUSG00000034761	113	-1.85	0.0638	0.112
Cbx4	ENSMUSG00000039989	114	-1.85	0.0637	0.112
Fxyd6	ENSMUSG00000066705	127	-1.85	0.0637	0.112
Brd8	ENSMUSG00000003778	124	-1.85	0.0641	0.113
Sephs1	ENSMUSG00000026662	126	-1.85	0.0649	0.114
Dnajc1	ENSMUSG00000026740	116	-1.85	0.0649	0.114
Itgb3bp	ENSMUSG00000028549	139	-1.85	0.0647	0.114
Mdfic	ENSMUSG00000041390	117	-1.85	0.0649	0.114
Trim32	ENSMUSG00000051675	117	-1.85	0.0648	0.114
Slc27a4	ENSMUSG00000059316	119	-1.85	0.0647	0.114
Katna1	ENSMUSG00000019794	120	-1.86	0.0624	0.111
Banp	ENSMUSG00000025316	128	-1.86	0.063	0.111
Ptp4a2	ENSMUSG00000028788	114	-1.86	0.0627	0.111
Sgf29	ENSMUSG00000030714	127	-1.86	0.063	0.111
Taf2	ENSMUSG00000037343	93	-1.86	0.0625	0.111
Ciz1	ENSMUSG00000039205	121	-1.86	0.0627	0.111
Itgav	ENSMUSG00000027087	117	-1.86	0.0633	0.112
Sf1	ENSMUSG00000024949	112	-1.87	0.061	0.109
Katnb1	ENSMUSG00000031787	151	-1.87	0.0608	0.109
Suz12	ENSMUSG00000017548	140	-1.87	0.0616	0.11
Brwd1	ENSMUSG00000022914	112	-1.87	0.0616	0.11
Slc4a1ap	ENSMUSG00000029141	148	-1.87	0.0618	0.11
Pcgf1	ENSMUSG00000069678	63	-1.87	0.062	0.11
Relb	ENSMUSG00000002983	113	-1.88	0.0596	0.107
Zdhhc6	ENSMUSG00000024982	115	-1.88	0.0598	0.107
Zranb2	ENSMUSG00000028180	112	-1.88	0.06	0.107
Mtf2	ENSMUSG00000029267	143	-1.88	0.0597	0.107
Mapkap1	ENSMUSG00000038696	114	-1.88	0.0597	0.107
Trrap	ENSMUSG00000045482	128	-1.88	0.0606	0.108
Naa15	ENSMUSG00000063273	117	-1.88	0.0607	0.108
Smo	ENSMUSG00000001761	118	-1.89	0.0581	0.105
Elp3	ENSMUSG00000022031	118	-1.89	0.0584	0.105
Atf6b	ENSMUSG00000015461	115	-1.89	0.059	0.106
Pds5a	ENSMUSG00000029202	117	-1.89	0.0592	0.106
Dek	ENSMUSG00000021377	114	-1.89	0.0593	0.107
Cc2d1a	ENSMUSG00000036686	132	-1.89	0.0594	0.107
Msh6	ENSMUSG00000005370	89	-1.9	0.0572	0.103
Ccnk	ENSMUSG00000021258	66	-1.9	0.057	0.103
Tial1	ENSMUSG00000030846	111	-1.9	0.057	0.103
Dmtf1	ENSMUSG00000042508	136	-1.9	0.0568	0.103
Cdk16	ENSMUSG00000031065	112	-1.9	0.0575	0.104
Rxrb	ENSMUSG00000039656	119	-1.9	0.0574	0.104
Kat2a	ENSMUSG00000020918	115	-1.91	0.0557	0.101
Leo1	ENSMUSG00000042487	122	-1.91	0.0566	0.103
Vim	ENSMUSG00000026728	222	-1.92	0.0545	0.0994
Flnc	ENSMUSG00000068699	124	-1.92	0.0545	0.0994
Il10rb	ENSMUSG00000022969	112	-1.92	0.0546	0.0995
Tnk2	ENSMUSG00000022791	58	-1.92	0.0552	0.1
Tceanc2	ENSMUSG00000028619	66	-1.92	0.055	0.1
Plscr1	ENSMUSG00000032369	122	-1.92	0.0551	0.1
Twist1	ENSMUSG00000035799	122	-1.92	0.055	0.1
Tulp3	ENSMUSG00000001521	137	-1.93	0.0539	0.0985
Pkia	ENSMUSG00000027499	152	-1.93	0.0539	0.0985
Skil	ENSMUSG00000027660	117	-1.93	0.0538	0.0985
Keap1	ENSMUSG00000003308	113	-1.94	0.0519	0.0954
Ccar1	ENSMUSG00000020074	113	-1.94	0.0518	0.0954
Smad7	ENSMUSG00000025880	122	-1.94	0.0521	0.0956
Znhit1	ENSMUSG00000059518	111	-1.94	0.0522	0.0957
Ptk2	ENSMUSG00000022607	144	-1.94	0.0529	0.0969
Ccnt2	ENSMUSG00000026349	138	-1.95	0.0506	0.0934
Cdk9	ENSMUSG00000009555	115	-1.95	0.051	0.094
Zc3h12a	ENSMUSG00000042677	150	-1.95	0.051	0.094
Rnf20	ENSMUSG00000028309	117	-1.95	0.0512	0.0943
Phf1	ENSMUSG00000024193	133	-1.96	0.0494	0.0916
Atp2b4	ENSMUSG00000026463	134	-1.96	0.0497	0.0919
Preb	ENSMUSG00000045302	124	-1.96	0.0496	0.0919
Thap7	ENSMUSG00000022760	120	-1.96	0.0497	0.092
Kat7	ENSMUSG00000038909	144	-1.96	0.0501	0.0925
Rap2a	ENSMUSG00000051615	115	-1.97	0.0484	0.0902
Thoc1	ENSMUSG00000024287	117	-1.97	0.0487	0.0908
Stxbp1	ENSMUSG00000026797	161	-1.97	0.0488	0.0909
Trip13	ENSMUSG00000021569	124	-1.97	0.049	0.091
Fes	ENSMUSG00000053158	130	-1.97	0.0489	0.091
Ubqln1	ENSMUSG00000005312	109	-1.97	0.0491	0.0911
Zfp598	ENSMUSG00000041130	132	-1.97	0.0492	0.0913
Nubp1	ENSMUSG00000022503	116	-1.97	0.0493	0.0915
Hnrnpul1	ENSMUSG00000040725	112	-1.98	0.0473	0.0889
Ccnc	ENSMUSG00000028252	126	-1.98	0.0476	0.0893
Ifnar1	ENSMUSG00000022967	112	-1.98	0.0478	0.0895
Shb	ENSMUSG00000044813	126	-1.98	0.0477	0.0895
Pdlim1	ENSMUSG00000055044	117	-1.98	0.0479	0.0896
Afap1l2	ENSMUSG00000025083	91	-1.98	0.0482	0.09
Guca1a	ENSMUSG00000023982	129	-1.99	0.0461	0.0871
Creb1	ENSMUSG00000025958	124	-1.99	0.0462	0.0871
Klf10	ENSMUSG00000037465	113	-1.99	0.0461	0.0871
Glis2	ENSMUSG00000014303	113	-1.99	0.0463	0.0872
Tbpl1	ENSMUSG00000071359	114	-1.99	0.0463	0.0872
Zbtb45	ENSMUSG00000049600	141	-1.99	0.0465	0.0874
Arf6	ENSMUSG00000044147	111	-1.99	0.0467	0.0878
Bicd2	ENSMUSG00000037933	116	-1.99	0.0468	0.0879
Aspscr1	ENSMUSG00000025142	109	-2	0.045	0.0853
Stxbp3	ENSMUSG00000027882	110	-2	0.045	0.0854
Tbcd	ENSMUSG00000039230	130	-2	0.0453	0.0858
Sgk1	ENSMUSG00000019970	119	-2	0.0457	0.0865
Sgcb	ENSMUSG00000029156	122	-2.01	0.0439	0.0838
Maz	ENSMUSG00000030678	115	-2.01	0.0439	0.0838
Znhit6	ENSMUSG00000074182	122	-2.01	0.044	0.0838
Sirt7	ENSMUSG00000025138	128	-2.01	0.0446	0.0847
Rab14	ENSMUSG00000026878	111	-2.01	0.0447	0.085
Hsf1	ENSMUSG00000022556	118	-2.02	0.0433	0.0829
Tardbp	ENSMUSG00000041459	121	-2.02	0.0434	0.0829
Med21	ENSMUSG00000030291	113	-2.03	0.0419	0.0806
Vps4a	ENSMUSG00000031913	119	-2.03	0.042	0.0808
Dnajc5	ENSMUSG00000000826	111	-2.03	0.0423	0.0813
Hoxc4	ENSMUSG00000075394	126	-2.03	0.0426	0.0816
Ccdc8	ENSMUSG00000041117	128	-2.03	0.0426	0.0817
Mta3	ENSMUSG00000055817	116	-2.04	0.0409	0.079
Ets2	ENSMUSG00000022895	145	-2.04	0.0413	0.0797
Dnmt1	ENSMUSG00000004099	152	-2.04	0.0418	0.0805
Xrcc6	ENSMUSG00000022471	124	-2.04	0.0417	0.0805
Acvr1	ENSMUSG00000026836	137	-2.04	0.0418	0.0805
Lims1	ENSMUSG00000019920	109	-2.05	0.0399	0.0777
Taf5l	ENSMUSG00000038697	121	-2.05	0.04	0.0777
Lrrc8c	ENSMUSG00000054720	120	-2.05	0.04	0.0777
Ncstn	ENSMUSG00000003458	116	-2.05	0.0401	0.0778
Ets1	ENSMUSG00000032035	129	-2.05	0.0401	0.0778
Sox12	ENSMUSG00000051817	134	-2.05	0.0403	0.0781
Zfp277	ENSMUSG00000055917	118	-2.05	0.0404	0.0782
Tada2a	ENSMUSG00000018651	131	-2.05	0.0406	0.0785
Ptprf	ENSMUSG00000033295	114	-2.06	0.0392	0.0767
Mlx	ENSMUSG00000017801	120	-2.06	0.0394	0.077
Tbxa2r	ENSMUSG00000034881	53	-2.06	0.0394	0.077
Hes1	ENSMUSG00000022528	113	-2.06	0.0396	0.0772
Rab40c	ENSMUSG00000025730	148	-2.06	0.0396	0.0772
Pon2	ENSMUSG00000032667	109	-2.06	0.0399	0.0776
Wbp4	ENSMUSG00000022023	118	-2.07	0.0382	0.0753
Xpr1	ENSMUSG00000026469	140	-2.07	0.0381	0.0753
Necap1	ENSMUSG00000030327	155	-2.07	0.0382	0.0753
Tjp1	ENSMUSG00000030516	126	-2.07	0.0382	0.0753
Piezo1	ENSMUSG00000014444	140	-2.07	0.0385	0.0758
Pdpn	ENSMUSG00000028583	110	-2.07	0.0386	0.0758
Men1	ENSMUSG00000024947	114	-2.07	0.0388	0.0761
Btg1	ENSMUSG00000036478	112	-2.07	0.0388	0.0761
Zfp513	ENSMUSG00000043059	116	-2.07	0.0388	0.0762
Zfp768	ENSMUSG00000047371	134	-2.08	0.0374	0.0743
Bbx	ENSMUSG00000022641	112	-2.08	0.0376	0.0747
Meaf6	ENSMUSG00000028863	110	-2.08	0.0376	0.0747
Cdc42se1	ENSMUSG00000046722	114	-2.08	0.0376	0.0747
Mtdh	ENSMUSG00000022255	114	-2.08	0.0378	0.0749
Minpp1	ENSMUSG00000024896	118	-2.08	0.0379	0.0749
Smap1	ENSMUSG00000026155	114	-2.08	0.0379	0.0749
Mynn	ENSMUSG00000037730	141	-2.09	0.0362	0.0724
Bag4	ENSMUSG00000037316	133	-2.09	0.0363	0.0725
Cic	ENSMUSG00000005442	134	-2.09	0.0365	0.0728
Tada1	ENSMUSG00000026563	115	-2.09	0.0365	0.0728
Casp8	ENSMUSG00000026029	113	-2.09	0.0369	0.0735
Puf60	ENSMUSG00000002524	116	-2.09	0.0369	0.0736
Akt1	ENSMUSG00000001729	112	-2.09	0.037	0.0737
Wdr6	ENSMUSG00000066357	120	-2.1	0.0353	0.0713
Phf12	ENSMUSG00000037791	138	-2.1	0.0355	0.0716
Zscan21	ENSMUSG00000037017	138	-2.1	0.0356	0.0717
Mxi1	ENSMUSG00000025025	125	-2.1	0.0356	0.0718
Zmat2	ENSMUSG00000001383	112	-2.1	0.0358	0.0719
Slc20a1	ENSMUSG00000027397	139	-2.1	0.0357	0.0719
Rnpep	ENSMUSG00000041926	119	-2.1	0.0358	0.0719
Golph3	ENSMUSG00000022200	110	-2.1	0.036	0.0723
Trip6	ENSMUSG00000023348	112	-2.1	0.0361	0.0723
Rap1a	ENSMUSG00000068798	113	-2.1	0.0361	0.0723
Cdc42ep1	ENSMUSG00000049521	149	-2.11	0.0349	0.0708
C1d	ENSMUSG00000000581	124	-2.11	0.035	0.0709
Zfp688	ENSMUSG00000045251	66	-2.11	0.0352	0.0712
Dnlz	ENSMUSG00000075467	120	-2.11	0.0352	0.0713
Rdx	ENSMUSG00000032050	113	-2.12	0.0336	0.0685
Slc7a8	ENSMUSG00000022180	109	-2.12	0.0338	0.0688
Ell	ENSMUSG00000070002	135	-2.12	0.0341	0.0694
Rnf2	ENSMUSG00000026484	114	-2.12	0.0343	0.0696
Rara	ENSMUSG00000037992	115	-2.12	0.0343	0.0696
Ryk	ENSMUSG00000032547	110	-2.13	0.0332	0.0679
Pias4	ENSMUSG00000004934	121	-2.13	0.0334	0.0683
Kat5	ENSMUSG00000024926	124	-2.13	0.0335	0.0683
Supt3	ENSMUSG00000038954	126	-2.13	0.0335	0.0683
Elp2	ENSMUSG00000024271	114	-2.13	0.0335	0.0684
Smad2	ENSMUSG00000024563	119	-2.14	0.0322	0.0664
Gpbp1l1	ENSMUSG00000034042	124	-2.14	0.0323	0.0665
Rab4b	ENSMUSG00000053291	128	-2.14	0.0323	0.0665
Ano10	ENSMUSG00000037949	119	-2.14	0.0323	0.0666
Rala	ENSMUSG00000008859	112	-2.14	0.0325	0.0668
Zfp523	ENSMUSG00000024220	57	-2.14	0.0325	0.0668
Tln1	ENSMUSG00000028465	121	-2.14	0.0326	0.0668
Smarcc1	ENSMUSG00000032481	112	-2.14	0.0326	0.0668
Amer1	ENSMUSG00000050332	140	-2.15	0.0314	0.0653
Xrcc5	ENSMUSG00000026187	119	-2.15	0.0317	0.0657
Rchy1	ENSMUSG00000029397	110	-2.15	0.0317	0.0657
Map3k1	ENSMUSG00000021754	129	-2.15	0.0318	0.0658
Zzz3	ENSMUSG00000039068	119	-2.15	0.0318	0.0658
Usp22	ENSMUSG00000042506	113	-2.15	0.0318	0.0658
Phb	ENSMUSG00000038845	111	-2.16	0.0306	0.0636
E2f4	ENSMUSG00000014859	116	-2.16	0.031	0.0645
Paxbp1	ENSMUSG00000022974	147	-2.17	0.0297	0.0622
Zdhhc7	ENSMUSG00000031823	120	-2.17	0.0297	0.0622
Klf16	ENSMUSG00000035397	130	-2.17	0.0298	0.0623
Arhgef1	ENSMUSG00000040940	108	-2.17	0.0297	0.0623
Hes6	ENSMUSG00000067071	114	-2.17	0.0298	0.0623
Sirt2	ENSMUSG00000015149	113	-2.17	0.03	0.0625
Sufu	ENSMUSG00000025231	116	-2.17	0.0299	0.0625
Il1r1	ENSMUSG00000026072	115	-2.17	0.03	0.0625
Zpr1	ENSMUSG00000032078	119	-2.17	0.0301	0.0627
Gabpb1	ENSMUSG00000027361	129	-2.18	0.029	0.0611
Adipor2	ENSMUSG00000030168	128	-2.18	0.029	0.0611
Polr3c	ENSMUSG00000028099	119	-2.18	0.0291	0.0613
Yap1	ENSMUSG00000053110	116	-2.18	0.0291	0.0613
Vps72	ENSMUSG00000008958	110	-2.18	0.0296	0.0621
Racgap1	ENSMUSG00000023015	192	-2.18	0.0295	0.0621
Sipa1	ENSMUSG00000056917	110	-2.18	0.0296	0.0621
Aip	ENSMUSG00000024847	112	-2.19	0.0283	0.06
Plgrkt	ENSMUSG00000016495	113	-2.19	0.0285	0.0603
Crcp	ENSMUSG00000025532	136	-2.19	0.0286	0.0605
Hic1	ENSMUSG00000043099	128	-2.19	0.0286	0.0605
Tfip11	ENSMUSG00000029345	137	-2.19	0.0287	0.0607
Hmg20b	ENSMUSG00000020232	114	-2.2	0.0276	0.0587
Dvl2	ENSMUSG00000020888	139	-2.2	0.0276	0.0587
Csk	ENSMUSG00000032312	113	-2.2	0.0275	0.0587
Tada3	ENSMUSG00000048930	112	-2.2	0.0277	0.0589
Rfc1	ENSMUSG00000029191	121	-2.2	0.028	0.0594
Rgs19	ENSMUSG00000002458	113	-2.2	0.028	0.0595
Ddx50	ENSMUSG00000020076	110	-2.21	0.0269	0.0576
Nr1h2	ENSMUSG00000060601	118	-2.21	0.027	0.058
Mapk1	ENSMUSG00000063358	109	-2.21	0.0271	0.058
BC004004	ENSMUSG00000052712	109	-2.21	0.0272	0.0582
Mcts1	ENSMUSG00000000355	112	-2.21	0.0273	0.0583
Fam168b	ENSMUSG00000037503	116	-2.21	0.0273	0.0583
Ank	ENSMUSG00000022265	153	-2.22	0.0261	0.0563
Zfp281	ENSMUSG00000041483	113	-2.22	0.0261	0.0563
Esd	ENSMUSG00000021996	124	-2.22	0.0263	0.0567
Arrb2	ENSMUSG00000060216	110	-2.22	0.0263	0.0567
Ciao1	ENSMUSG00000003662	116	-2.22	0.0266	0.0571
Ehd1	ENSMUSG00000024772	118	-2.22	0.0267	0.0574
Topors	ENSMUSG00000036822	112	-2.23	0.0254	0.0552
Ifnar2	ENSMUSG00000022971	114	-2.23	0.0257	0.0556
Vps36	ENSMUSG00000031479	114	-2.23	0.0257	0.0556
Ash2l	ENSMUSG00000031575	118	-2.23	0.0256	0.0556
Gmeb1	ENSMUSG00000028901	59	-2.23	0.0259	0.0559
Sap18	ENSMUSG00000021963	111	-2.24	0.0248	0.0543
Rbfox2	ENSMUSG00000033565	110	-2.24	0.0249	0.0543
Zcchc14	ENSMUSG00000061410	122	-2.24	0.0249	0.0543
Polr2i	ENSMUSG00000019738	111	-2.24	0.025	0.0544
Ripk2	ENSMUSG00000041135	125	-2.24	0.0251	0.0546
Aatf	ENSMUSG00000018697	114	-2.24	0.0252	0.0549
Fzd2	ENSMUSG00000050288	115	-2.25	0.0242	0.0533
Tfeb	ENSMUSG00000023990	39	-2.25	0.0243	0.0535
Zfp318	ENSMUSG00000015597	81	-2.25	0.0244	0.0536
Sppl2b	ENSMUSG00000035206	119	-2.25	0.0245	0.0539
Adam12	ENSMUSG00000054555	123	-2.25	0.0245	0.0539
Pcgf2	ENSMUSG00000018537	112	-2.25	0.0246	0.054
Pknox2	ENSMUSG00000035934	37	-2.25	0.0247	0.0541
Ssbp4	ENSMUSG00000070003	114	-2.25	0.0247	0.0541
Nufip1	ENSMUSG00000022009	120	-2.26	0.0237	0.0525
Pttg1ip	ENSMUSG00000009291	112	-2.26	0.0238	0.0528
Tlcd1	ENSMUSG00000019437	94	-2.26	0.0239	0.0528
Srebf1	ENSMUSG00000020538	114	-2.26	0.0239	0.0528
Tmem97	ENSMUSG00000037278	114	-2.26	0.0239	0.0529
Slc30a9	ENSMUSG00000029221	120	-2.26	0.024	0.053
Zfand1	ENSMUSG00000039795	138	-2.26	0.0241	0.0532
Myh10	ENSMUSG00000020900	114	-2.27	0.023	0.0513
Snx5	ENSMUSG00000027423	111	-2.27	0.0232	0.0517
Slc39a10	ENSMUSG00000025986	129	-2.27	0.0234	0.0521
Raet1e	ENSMUSG00000053219	100	-2.27	0.0235	0.0522
Traf7	ENSMUSG00000052752	117	-2.28	0.0224	0.0502
Cdc42ep4	ENSMUSG00000041598	148	-2.28	0.0225	0.0504
Supt4a	ENSMUSG00000020485	113	-2.28	0.0226	0.0505
Flna	ENSMUSG00000031328	114	-2.28	0.0228	0.0509
Itgb3	ENSMUSG00000020689	34	-2.29	0.0217	0.0492
Mafg	ENSMUSG00000051510	110	-2.29	0.0218	0.0494
Bmi1	ENSMUSG00000026739	130	-2.29	0.022	0.0496
Tspan14	ENSMUSG00000037824	54	-2.29	0.022	0.0497
Rrad	ENSMUSG00000031880	134	-2.29	0.0222	0.0499
Ankrd13a	ENSMUSG00000041870	123	-2.29	0.0222	0.0499
Zfp687	ENSMUSG00000019338	110	-2.29	0.0223	0.05
Zfp830	ENSMUSG00000046010	136	-2.29	0.0222	0.05
Rassf1	ENSMUSG00000010067	113	-2.3	0.0212	0.0485
E2f5	ENSMUSG00000027552	152	-2.3	0.0213	0.0486
Orc6	ENSMUSG00000031697	118	-2.3	0.0214	0.0486
Suds3	ENSMUSG00000066900	110	-2.3	0.0213	0.0486
Neo1	ENSMUSG00000032340	116	-2.3	0.0214	0.0487
Zc3hc1	ENSMUSG00000039130	121	-2.3	0.0215	0.0489
Inpp5k	ENSMUSG00000006127	151	-2.3	0.0217	0.0491
Ppp4c	ENSMUSG00000030697	116	-2.3	0.0217	0.0491
Tarbp2	ENSMUSG00000023051	126	-2.31	0.0207	0.0477
Efna5	ENSMUSG00000048915	113	-2.31	0.0207	0.0477
Taf6l	ENSMUSG00000003680	111	-2.31	0.0208	0.0479
Irf3	ENSMUSG00000003184	119	-2.31	0.0209	0.048
Snapc2	ENSMUSG00000011837	126	-2.31	0.0209	0.048
Acin1	ENSMUSG00000022185	113	-2.31	0.0209	0.048
Slc27a1	ENSMUSG00000031808	61	-2.31	0.0209	0.048
Kmt5a	ENSMUSG00000049327	113	-2.31	0.0209	0.048
Usp4	ENSMUSG00000032612	119	-2.31	0.021	0.0481
Brms1l	ENSMUSG00000012076	138	-2.31	0.0211	0.0482
Tmpo	ENSMUSG00000019961	112	-2.32	0.0201	0.0468
Tspan9	ENSMUSG00000030352	115	-2.32	0.0202	0.0469
Mcm5	ENSMUSG00000005410	125	-2.32	0.0203	0.0471
Mnat1	ENSMUSG00000021103	127	-2.32	0.0203	0.0471
Dbn1	ENSMUSG00000034675	116	-2.32	0.0203	0.0471
Ube2v1	ENSMUSG00000078923	134	-2.32	0.0202	0.0471
Creb3l2	ENSMUSG00000038648	115	-2.32	0.0204	0.0473
Gabbr1	ENSMUSG00000024462	84	-2.32	0.0205	0.0474
Zfp263	ENSMUSG00000022529	98	-2.32	0.0206	0.0475
Ubap1	ENSMUSG00000028437	109	-2.33	0.0197	0.0463
Ccdc124	ENSMUSG00000007721	111	-2.33	0.0198	0.0464
Mink1	ENSMUSG00000020827	91	-2.33	0.0199	0.0464
Smarcd3	ENSMUSG00000028949	121	-2.33	0.0198	0.0464
Nsf	ENSMUSG00000034187	125	-2.33	0.0199	0.0464
1810055G02Rik	ENSMUSG00000035372	113	-2.33	0.0198	0.0464
Tspyl2	ENSMUSG00000041096	132	-2.33	0.02	0.0467
Serinc1	ENSMUSG00000019877	113	-2.34	0.0191	0.0453
Ifngr2	ENSMUSG00000022965	113	-2.34	0.0192	0.0455
Camk2d	ENSMUSG00000053819	113	-2.34	0.0192	0.0455
Cbfa2t2	ENSMUSG00000038533	124	-2.34	0.0193	0.0457
Ssbp3	ENSMUSG00000061887	117	-2.34	0.0193	0.0457
Cby1	ENSMUSG00000022428	114	-2.34	0.0195	0.0459
Bambi	ENSMUSG00000024232	123	-2.34	0.0195	0.0459
Mrrf	ENSMUSG00000026887	115	-2.34	0.0195	0.0459
Dnm2	ENSMUSG00000033335	114	-2.34	0.0194	0.0459
Sgms1	ENSMUSG00000040451	121	-2.34	0.0195	0.0459
Vezt	ENSMUSG00000036099	145	-2.35	0.0186	0.0445
Zbed3	ENSMUSG00000041995	119	-2.35	0.0186	0.0445
Commd7	ENSMUSG00000056941	109	-2.35	0.0186	0.0445
Brd7	ENSMUSG00000031660	113	-2.35	0.0188	0.0448
Zfp110	ENSMUSG00000058638	136	-2.35	0.0188	0.0448
Ppard	ENSMUSG00000002250	143	-2.35	0.0189	0.045
Atp2c1	ENSMUSG00000032570	113	-2.35	0.0189	0.0451
Ppil2	ENSMUSG00000022771	113	-2.36	0.0181	0.0438
Emsy	ENSMUSG00000035401	120	-2.36	0.018	0.0438
Snta1	ENSMUSG00000027488	117	-2.36	0.0181	0.0439
Erf	ENSMUSG00000040857	116	-2.36	0.0181	0.0439
Pcgf5	ENSMUSG00000024805	125	-2.36	0.0182	0.044
Zdhhc16	ENSMUSG00000025157	111	-2.36	0.0182	0.044
Vhl	ENSMUSG00000033933	132	-2.36	0.0183	0.044
Pi4k2a	ENSMUSG00000025178	147	-2.36	0.0183	0.0441
Hspa5	ENSMUSG00000026864	190	-2.36	0.0184	0.0443
Nmt1	ENSMUSG00000020936	112	-2.36	0.0185	0.0444
Slc31a1	ENSMUSG00000066150	112	-2.36	0.0185	0.0444
Ecsit	ENSMUSG00000066839	127	-2.36	0.0185	0.0444
Mlkl	ENSMUSG00000012519	157	-2.37	0.0176	0.0428
Pnn	ENSMUSG00000020994	111	-2.37	0.0179	0.0436
Apbb1	ENSMUSG00000037032	120	-2.37	0.018	0.0437
Laptm4a	ENSMUSG00000020585	131	-2.38	0.0172	0.0422
Max	ENSMUSG00000059436	115	-2.38	0.0172	0.0422
Esrra	ENSMUSG00000024955	125	-2.38	0.0173	0.0423
Tdp2	ENSMUSG00000035958	113	-2.38	0.0173	0.0423
Usf1	ENSMUSG00000026641	111	-2.38	0.0174	0.0424
Nr1d1	ENSMUSG00000020889	133	-2.38	0.0175	0.0427
Prmt5	ENSMUSG00000023110	112	-2.39	0.0167	0.0412
Slc16a1	ENSMUSG00000032902	115	-2.39	0.0168	0.0414
Zkscan3	ENSMUSG00000021327	121	-2.39	0.0169	0.0416
Gas1	ENSMUSG00000052957	116	-2.39	0.0171	0.0419
Atn1	ENSMUSG00000004263	110	-2.4	0.0162	0.0403
Adgrl1	ENSMUSG00000013033	130	-2.4	0.0163	0.0405
Hmgcs1	ENSMUSG00000093930	122	-2.4	0.0164	0.0408
Rnf4	ENSMUSG00000029110	111	-2.4	0.0166	0.0411
Bclaf1	ENSMUSG00000037608	113	-2.4	0.0166	0.0411
Elp5	ENSMUSG00000018565	117	-2.41	0.0159	0.0396
Fap	ENSMUSG00000000392	133	-2.41	0.016	0.0398
Pkn1	ENSMUSG00000057672	124	-2.41	0.0162	0.0402
Cldn3	ENSMUSG00000070473	34	-2.42	0.0154	0.0387
Tjap1	ENSMUSG00000012296	120	-2.42	0.0155	0.0388
Cdc42ep5	ENSMUSG00000063838	113	-2.42	0.0155	0.0388
Snx6	ENSMUSG00000005656	112	-2.42	0.0157	0.0392
Gstp1	ENSMUSG00000060803	146	-2.43	0.0149	0.038
Kcnma1	ENSMUSG00000063142	60	-2.43	0.0149	0.038
Rcbtb1	ENSMUSG00000035469	148	-2.43	0.015	0.0381
Vps37b	ENSMUSG00000066278	107	-2.43	0.015	0.0381
Zfp131	ENSMUSG00000094870	124	-2.43	0.015	0.0381
Ctnnbip1	ENSMUSG00000028988	113	-2.43	0.015	0.0382
Yy1	ENSMUSG00000021264	111	-2.43	0.0151	0.0383
Chmp1a	ENSMUSG00000000743	114	-2.43	0.0153	0.0384
Snf8	ENSMUSG00000006058	117	-2.43	0.0153	0.0384
Nme2	ENSMUSG00000020857	113	-2.43	0.0153	0.0384
Mcm4	ENSMUSG00000022673	125	-2.43	0.0152	0.0384
Ankrd27	ENSMUSG00000034867	123	-2.43	0.0152	0.0384
Hoxb7	ENSMUSG00000038721	118	-2.43	0.0152	0.0384
Mypop	ENSMUSG00000048481	124	-2.43	0.0153	0.0384
Hipk2	ENSMUSG00000061436	135	-2.43	0.0152	0.0384
Pml	ENSMUSG00000036986	74	-2.44	0.0146	0.0375
Sin3b	ENSMUSG00000031622	112	-2.44	0.0148	0.0378
Zfp511	ENSMUSG00000025470	116	-2.44	0.0148	0.0379
Hand2	ENSMUSG00000038193	118	-2.44	0.0148	0.0379
Ewsr1	ENSMUSG00000009079	113	-2.45	0.0141	0.0366
Ptpn1	ENSMUSG00000027540	118	-2.45	0.0141	0.0366
Ppp1r13l	ENSMUSG00000040734	85	-2.45	0.0142	0.0367
Wt1	ENSMUSG00000016458	120	-2.45	0.0143	0.0369
Rhoc	ENSMUSG00000002233	123	-2.45	0.0144	0.037
Dnaja3	ENSMUSG00000004069	116	-2.45	0.0144	0.037
Cib1	ENSMUSG00000030538	109	-2.45	0.0144	0.0371
Sqstm1	ENSMUSG00000015837	110	-2.45	0.0145	0.0372
Gnai3	ENSMUSG00000000001	111	-2.46	0.0137	0.0357
Rgs10	ENSMUSG00000030844	123	-2.46	0.0139	0.0362
Apex1	ENSMUSG00000035960	111	-2.46	0.014	0.0363
Rgs2	ENSMUSG00000026360	73	-2.47	0.0133	0.0349
Cbx3	ENSMUSG00000029836	119	-2.47	0.0134	0.0349
Fiz1	ENSMUSG00000061374	129	-2.47	0.0134	0.0349
Ddx54	ENSMUSG00000029599	115	-2.47	0.0134	0.035
Fasn	ENSMUSG00000025153	121	-2.47	0.0135	0.0351
Mbtd1	ENSMUSG00000059474	114	-2.48	0.013	0.0344
Nelfa	ENSMUSG00000029111	112	-2.48	0.0131	0.0345
Zc3h18	ENSMUSG00000017478	118	-2.48	0.0132	0.0346
Myo1c	ENSMUSG00000017774	110	-2.48	0.0132	0.0346
Cryl1	ENSMUSG00000021947	135	-2.48	0.0131	0.0346
Sfpq	ENSMUSG00000028820	118	-2.48	0.0131	0.0346
Zfp330	ENSMUSG00000031711	115	-2.48	0.0131	0.0346
Rap2c	ENSMUSG00000050029	121	-2.48	0.0132	0.0347
Rbbp7	ENSMUSG00000031353	112	-2.48	0.0133	0.0348
Arhgap1	ENSMUSG00000027247	116	-2.49	0.0127	0.0338
Fgd5	ENSMUSG00000034037	47	-2.49	0.0127	0.0338
Homer3	ENSMUSG00000003573	123	-2.49	0.0127	0.034
Chmp2b	ENSMUSG00000004843	111	-2.49	0.0129	0.0342
Exoc1	ENSMUSG00000036435	134	-2.49	0.0128	0.0342
Esf1	ENSMUSG00000045624	120	-2.49	0.013	0.0344
Rhog	ENSMUSG00000073982	121	-2.49	0.0129	0.0344
Zfyve27	ENSMUSG00000018820	135	-2.5	0.0123	0.033
Scyl1	ENSMUSG00000024941	114	-2.5	0.0123	0.033
Smarca5	ENSMUSG00000031715	109	-2.5	0.0123	0.033
Nab1	ENSMUSG00000002881	119	-2.5	0.0125	0.0335
Ajuba	ENSMUSG00000022178	40	-2.5	0.0126	0.0336
Jmjd6	ENSMUSG00000056962	120	-2.5	0.0126	0.0337
Per1	ENSMUSG00000020893	140	-2.51	0.0121	0.0325
Mms19	ENSMUSG00000025159	140	-2.51	0.0121	0.0325
Adgra3	ENSMUSG00000029090	127	-2.51	0.0121	0.0325
Smarcb1	ENSMUSG00000000902	111	-2.52	0.0116	0.0314
Slc20a2	ENSMUSG00000037656	141	-2.52	0.0118	0.0319
Ctnna1	ENSMUSG00000037815	111	-2.52	0.0118	0.0319
Srf	ENSMUSG00000015605	117	-2.52	0.0119	0.032
Chd1	ENSMUSG00000023852	114	-2.52	0.0118	0.032
Cers2	ENSMUSG00000015714	114	-2.53	0.0113	0.0309
Csnk1d	ENSMUSG00000025162	116	-2.53	0.0113	0.031
Crlf2	ENSMUSG00000033467	113	-2.53	0.0113	0.031
Pyurf	ENSMUSG00000043162	113	-2.53	0.0114	0.0311
Npc1	ENSMUSG00000024413	90	-2.53	0.0114	0.0312
Tpbg	ENSMUSG00000035274	116	-2.53	0.0115	0.0313
Rfxap	ENSMUSG00000036615	117	-2.53	0.0115	0.0314
Itga5	ENSMUSG00000000555	113	-2.54	0.011	0.0303
Zfp512	ENSMUSG00000062761	148	-2.54	0.011	0.0304
Sigmar1	ENSMUSG00000036078	114	-2.54	0.0111	0.0305
Cap1	ENSMUSG00000028656	122	-2.54	0.0111	0.0306
Src	ENSMUSG00000027646	123	-2.54	0.0112	0.0308
Tsc22d4	ENSMUSG00000029723	112	-2.54	0.0112	0.0308
Hdac6	ENSMUSG00000031161	81	-2.54	0.0112	0.0308
Cnot8	ENSMUSG00000020515	114	-2.55	0.0107	0.0298
Tgfb1i1	ENSMUSG00000030782	115	-2.55	0.0107	0.0298
Ywhab	ENSMUSG00000018326	119	-2.55	0.0108	0.03
Eri3	ENSMUSG00000033423	113	-2.55	0.0108	0.03
Ehd2	ENSMUSG00000074364	120	-2.55	0.0108	0.03
Noct	ENSMUSG00000023087	126	-2.55	0.0109	0.0302
Baz1a	ENSMUSG00000035021	113	-2.55	0.0109	0.0302
Srebf2	ENSMUSG00000022463	119	-2.56	0.0103	0.029
Fndc4	ENSMUSG00000038552	126	-2.56	0.0104	0.0291
Ruvbl1	ENSMUSG00000030079	109	-2.56	0.0104	0.0292
Zc3h14	ENSMUSG00000021012	111	-2.56	0.0105	0.0293
Nras	ENSMUSG00000027852	114	-2.56	0.0105	0.0294
Rnf10	ENSMUSG00000041740	119	-2.56	0.0106	0.0295
Plek2	ENSMUSG00000021118	41	-2.57	0.0103	0.0289
Stat1	ENSMUSG00000026104	118	-2.57	0.0103	0.0289
Ilk	ENSMUSG00000030890	114	-2.57	0.0102	0.0289
Phf5a	ENSMUSG00000061360	124	-2.57	0.0103	0.0289
Rabepk	ENSMUSG00000070953	114	-2.57	0.0102	0.0289
Pafah1b2	ENSMUSG00000003131	118	-2.58	0.00977	0.0279
Ing4	ENSMUSG00000030330	127	-2.58	0.00975	0.0279
Ilf2	ENSMUSG00000001016	119	-2.58	0.00983	0.028
Cit	ENSMUSG00000029516	82	-2.58	0.00982	0.028
Tle3	ENSMUSG00000032280	135	-2.58	0.00981	0.028
Srpk1	ENSMUSG00000004865	112	-2.58	0.00991	0.0281
Phf20	ENSMUSG00000038116	114	-2.58	0.0099	0.0281
Clmp	ENSMUSG00000032024	111	-2.58	0.00998	0.0282
Stub1	ENSMUSG00000039615	124	-2.58	0.00994	0.0282
Abcg2	ENSMUSG00000029802	117	-2.59	0.00949	0.0275
Dync1li1	ENSMUSG00000032435	114	-2.59	0.00949	0.0275
Prmt7	ENSMUSG00000060098	110	-2.59	0.00948	0.0275
Esam	ENSMUSG00000001946	73	-2.59	0.00966	0.0277
Sra1	ENSMUSG00000006050	116	-2.59	0.00964	0.0277
Tmem173	ENSMUSG00000024349	127	-2.59	0.00959	0.0277
Arfgap2	ENSMUSG00000027255	120	-2.59	0.00965	0.0277
Tmem88	ENSMUSG00000045377	116	-2.59	0.00957	0.0277
Mtfr1	ENSMUSG00000027601	113	-2.59	0.00968	0.0278
Mrgprf	ENSMUSG00000031070	117	-2.59	0.00972	0.0279
Ecd	ENSMUSG00000021810	115	-2.6	0.00925	0.027
Pdcd10	ENSMUSG00000027835	108	-2.6	0.00924	0.027
Acox1	ENSMUSG00000020777	112	-2.6	0.00934	0.0272
Krt19	ENSMUSG00000020911	137	-2.6	0.00936	0.0272
Rnf34	ENSMUSG00000029474	124	-2.6	0.00937	0.0272
Irf2bp1	ENSMUSG00000044030	131	-2.6	0.00935	0.0272
Gatad1	ENSMUSG00000007415	109	-2.61	0.00894	0.0264
Zfpl1	ENSMUSG00000024792	113	-2.61	0.00898	0.0264
Ttyh2	ENSMUSG00000034714	135	-2.61	0.00897	0.0264
Efna2	ENSMUSG00000003070	127	-2.61	0.009	0.0265
Mcm3	ENSMUSG00000041859	126	-2.61	0.00902	0.0265
Panx1	ENSMUSG00000031934	118	-2.61	0.00906	0.0266
Zrsr2	ENSMUSG00000031370	114	-2.61	0.00914	0.0268
Zcchc10	ENSMUSG00000018239	115	-2.62	0.00875	0.026
Avpr1a	ENSMUSG00000020123	42	-2.62	0.00877	0.026
Litaf	ENSMUSG00000022500	116	-2.62	0.00876	0.026
Mbd3	ENSMUSG00000035478	111	-2.62	0.0087	0.026
Frk	ENSMUSG00000019779	121	-2.62	0.00887	0.0263
Slc9a6	ENSMUSG00000060681	140	-2.62	0.00891	0.0264
Mbp	ENSMUSG00000041607	74	-2.63	0.00842	0.0253
Map2k1	ENSMUSG00000004936	113	-2.63	0.0085	0.0255
Myh9	ENSMUSG00000022443	110	-2.63	0.00858	0.0257
Synpo	ENSMUSG00000043079	113	-2.63	0.00857	0.0257
Nat14	ENSMUSG00000035285	124	-2.63	0.00863	0.0258
Mien1	ENSMUSG00000002580	110	-2.64	0.00817	0.0249
Brd4	ENSMUSG00000024002	118	-2.64	0.00821	0.0249
Cct3	ENSMUSG00000001416	113	-2.64	0.00825	0.025
Slc9a3r2	ENSMUSG00000002504	122	-2.64	0.00829	0.0251
Gata5	ENSMUSG00000015627	68	-2.64	0.00829	0.0251
Cttn	ENSMUSG00000031078	112	-2.64	0.00831	0.0251
Csrnp1	ENSMUSG00000032515	109	-2.64	0.0083	0.0251
Mpp6	ENSMUSG00000038388	116	-2.64	0.00833	0.0251
Hmox1	ENSMUSG00000005413	116	-2.65	0.00797	0.0244
Rcc2	ENSMUSG00000040945	113	-2.65	0.00797	0.0244
Barx1	ENSMUSG00000021381	135	-2.65	0.00802	0.0245
Gpbp1	ENSMUSG00000032745	118	-2.65	0.00806	0.0246
Hdac1	ENSMUSG00000028800	111	-2.65	0.00811	0.0247
Med29	ENSMUSG00000003444	114	-2.66	0.00771	0.0239
Plcl1	ENSMUSG00000038349	82	-2.66	0.00777	0.024
Gtf2h4	ENSMUSG00000001524	133	-2.66	0.00782	0.0241
Map2k3	ENSMUSG00000018932	111	-2.66	0.00782	0.0241
Pnpla2	ENSMUSG00000025509	148	-2.66	0.00778	0.0241
Hmox2	ENSMUSG00000004070	114	-2.66	0.00792	0.0243
Prr7	ENSMUSG00000034686	132	-2.67	0.00751	0.0235
Kat8	ENSMUSG00000030801	127	-2.67	0.00761	0.0237
Bace1	ENSMUSG00000032086	125	-2.67	0.00758	0.0237
Arid4b	ENSMUSG00000039219	112	-2.67	0.0076	0.0237
Dpp3	ENSMUSG00000063904	115	-2.67	0.00763	0.0237
Cav1	ENSMUSG00000007655	148	-2.67	0.00765	0.0238
Eny2	ENSMUSG00000022338	119	-2.67	0.00768	0.0238
Hdac3	ENSMUSG00000024454	114	-2.68	0.0073	0.0229
Snd1	ENSMUSG00000001424	115	-2.68	0.00736	0.0231
Mrap	ENSMUSG00000039956	90	-2.68	0.00744	0.0233
Snapc1	ENSMUSG00000021113	135	-2.68	0.00746	0.0234
Gna11	ENSMUSG00000034781	111	-2.69	0.00704	0.0224
Nr2f6	ENSMUSG00000002393	109	-2.69	0.00712	0.0226
Dmap1	ENSMUSG00000009640	118	-2.69	0.00715	0.0226
Prkcd	ENSMUSG00000021948	115	-2.69	0.00712	0.0226
Ptges2	ENSMUSG00000026820	115	-2.69	0.00714	0.0226
Ncs1	ENSMUSG00000062661	122	-2.69	0.00712	0.0226
Yaf2	ENSMUSG00000022634	115	-2.69	0.00721	0.0227
Pmf1	ENSMUSG00000028066	120	-2.69	0.00721	0.0227
Efnb1	ENSMUSG00000031217	120	-2.69	0.0072	0.0227
Ralb	ENSMUSG00000004451	117	-2.7	0.00687	0.022
Nkain4	ENSMUSG00000027574	194	-2.7	0.00688	0.022
Lamtor1	ENSMUSG00000030842	112	-2.7	0.00689	0.022
Camta1	ENSMUSG00000014592	114	-2.7	0.007	0.0224
Dgka	ENSMUSG00000025357	109	-2.7	0.00701	0.0224
Rexo4	ENSMUSG00000052406	134	-2.71	0.00664	0.0214
Mcoln1	ENSMUSG00000004567	89	-2.71	0.00666	0.0215
Phldb2	ENSMUSG00000033149	114	-2.71	0.00679	0.0218
Cux1	ENSMUSG00000029705	113	-2.72	0.00644	0.021
Steap1	ENSMUSG00000015652	109	-2.72	0.0065	0.0211
Fas	ENSMUSG00000024778	116	-2.72	0.00649	0.0211
Pbx2	ENSMUSG00000034673	133	-2.72	0.00651	0.0211
Hivep3	ENSMUSG00000028634	153	-2.72	0.0066	0.0213
Siva1	ENSMUSG00000064326	112	-2.73	0.00624	0.0205
Flad1	ENSMUSG00000042642	129	-2.73	0.00633	0.0208
Gata6	ENSMUSG00000005836	116	-2.73	0.00642	0.0209
Zdhhc20	ENSMUSG00000021969	109	-2.73	0.00642	0.0209
Cd14	ENSMUSG00000051439	98	-2.73	0.0064	0.0209
Slc39a14	ENSMUSG00000022094	117	-2.74	0.00605	0.02
Lrrfip1	ENSMUSG00000026305	114	-2.74	0.00613	0.0203
Strap	ENSMUSG00000030224	111	-2.74	0.00615	0.0203
Cd74	ENSMUSG00000024610	96	-2.74	0.00619	0.0204
Uhrf1	ENSMUSG00000001228	146	-2.74	0.00624	0.0205
Hdac2	ENSMUSG00000019777	111	-2.74	0.00622	0.0205
Hnrnpd	ENSMUSG00000000568	116	-2.75	0.0059	0.0197
Dab2	ENSMUSG00000022150	118	-2.75	0.00593	0.0197
Copb1	ENSMUSG00000030754	109	-2.75	0.0059	0.0197
Parva	ENSMUSG00000030770	113	-2.75	0.00593	0.0197
Pias3	ENSMUSG00000028101	145	-2.75	0.006	0.0199
Pspc1	ENSMUSG00000021938	118	-2.75	0.00604	0.02
Cul4b	ENSMUSG00000031095	137	-2.76	0.00577	0.0194
Rab22a	ENSMUSG00000027519	113	-2.76	0.00581	0.0195
Got2	ENSMUSG00000031672	110	-2.76	0.00586	0.0196
Bcar1	ENSMUSG00000031955	132	-2.76	0.00585	0.0196
Hoxa5	ENSMUSG00000038253	124	-2.76	0.00585	0.0196
Steap2	ENSMUSG00000015653	114	-2.77	0.00556	0.019
Gtf2h2	ENSMUSG00000021639	138	-2.77	0.00555	0.019
Lrpprc	ENSMUSG00000024120	125	-2.77	0.0056	0.019
Gpr39	ENSMUSG00000026343	121	-2.77	0.00558	0.019
Tdg	ENSMUSG00000034674	111	-2.77	0.00553	0.019
Spint2	ENSMUSG00000074227	115	-2.77	0.00554	0.019
Farp1	ENSMUSG00000025555	130	-2.77	0.00569	0.0192
Nsfl1c	ENSMUSG00000027455	110	-2.77	0.00567	0.0192
Pkig	ENSMUSG00000035268	113	-2.77	0.00565	0.0192
Mybbp1a	ENSMUSG00000040463	114	-2.77	0.00568	0.0192
Pa2g4	ENSMUSG00000025364	113	-2.78	0.00537	0.0186
Usp14	ENSMUSG00000047879	109	-2.78	0.00538	0.0187
Akirin2	ENSMUSG00000028291	113	-2.78	0.00543	0.0188
Fermt2	ENSMUSG00000037712	113	-2.78	0.00545	0.0188
Gle1	ENSMUSG00000019715	119	-2.78	0.00549	0.0189
Trim27	ENSMUSG00000021326	111	-2.78	0.0055	0.0189
Irf5	ENSMUSG00000029771	78	-2.78	0.00547	0.0189
Taf6	ENSMUSG00000036980	114	-2.78	0.00547	0.0189
Med25	ENSMUSG00000002968	112	-2.79	0.00529	0.0185
Rusc1	ENSMUSG00000041263	123	-2.79	0.00532	0.0185
Znhit3	ENSMUSG00000020526	136	-2.8	0.00503	0.0178
Surf2	ENSMUSG00000014873	160	-2.8	0.00508	0.0179
Ascc2	ENSMUSG00000020412	139	-2.8	0.00508	0.0179
Nelfe	ENSMUSG00000024369	120	-2.8	0.00509	0.0179
Mycbp	ENSMUSG00000028647	114	-2.8	0.0051	0.0179
Tcf25	ENSMUSG00000001472	118	-2.8	0.00514	0.0181
Gjb3	ENSMUSG00000042367	86	-2.8	0.00517	0.0181
Smarce1	ENSMUSG00000037935	110	-2.8	0.00519	0.0182
Sap30bp	ENSMUSG00000020755	115	-2.81	0.00489	0.0175
Park7	ENSMUSG00000028964	121	-2.81	0.00493	0.0176
Rab8a	ENSMUSG00000003037	112	-2.81	0.00499	0.0177
Vamp7	ENSMUSG00000051412	109	-2.81	0.00497	0.0177
Fads1	ENSMUSG00000010663	117	-2.82	0.00473	0.0172
Trp53	ENSMUSG00000059552	110	-2.82	0.00475	0.0172
Snap47	ENSMUSG00000009894	112	-2.82	0.00477	0.0173
Nfkbib	ENSMUSG00000030595	117	-2.82	0.0048	0.0173
Adrm1	ENSMUSG00000039041	109	-2.82	0.00481	0.0173
Stx11	ENSMUSG00000039232	75	-2.82	0.00478	0.0173
Ccne1	ENSMUSG00000002068	103	-2.82	0.00487	0.0174
Cd44	ENSMUSG00000005087	120	-2.82	0.00483	0.0174
Adgrg1	ENSMUSG00000031785	25	-2.82	0.00486	0.0174
Zfp787	ENSMUSG00000046792	121	-2.82	0.00484	0.0174
Plscr3	ENSMUSG00000019461	108	-2.83	0.00465	0.017
Ppp3r1	ENSMUSG00000033953	109	-2.83	0.00464	0.017
Elof1	ENSMUSG00000013822	114	-2.83	0.00468	0.0171
Snap23	ENSMUSG00000027287	110	-2.83	0.00467	0.0171
Ide	ENSMUSG00000056999	122	-2.83	0.00469	0.0171
Gps2	ENSMUSG00000023170	119	-2.83	0.00473	0.0172
Pvr	ENSMUSG00000040511	117	-2.84	0.00445	0.0165
Zbtb7c	ENSMUSG00000044646	140	-2.84	0.00446	0.0165
Tanc1	ENSMUSG00000035168	127	-2.84	0.00453	0.0167
Zfp579	ENSMUSG00000051550	131	-2.84	0.00452	0.0167
Coro1c	ENSMUSG00000004530	116	-2.84	0.00457	0.0168
Gjc1	ENSMUSG00000034520	96	-2.85	0.0044	0.0163
Psen1	ENSMUSG00000019969	116	-2.86	0.00419	0.0157
Cav2	ENSMUSG00000000058	109	-2.86	0.00428	0.0159
Nsd2	ENSMUSG00000057406	144	-2.86	0.00425	0.0159
Slc6a6	ENSMUSG00000030096	127	-2.86	0.0043	0.016
Gja1	ENSMUSG00000050953	115	-2.87	0.00409	0.0154
Suclg1	ENSMUSG00000052738	115	-2.87	0.00406	0.0154
Zfand5	ENSMUSG00000024750	113	-2.87	0.0041	0.0155
Rrp8	ENSMUSG00000030888	129	-2.87	0.00416	0.0156
Metap2	ENSMUSG00000036112	110	-2.87	0.00414	0.0156
Stx7	ENSMUSG00000019998	113	-2.88	0.00393	0.015
Cdipt	ENSMUSG00000030682	114	-2.88	0.00393	0.015
Pdgfrb	ENSMUSG00000024620	139	-2.88	0.00396	0.0151
Fhl2	ENSMUSG00000008136	138	-2.88	0.00404	0.0153
Tcf3	ENSMUSG00000020167	116	-2.88	0.00404	0.0153
Foxp4	ENSMUSG00000023991	119	-2.88	0.00402	0.0153
Pdia6	ENSMUSG00000020571	168	-2.89	0.00379	0.0146
Lbh	ENSMUSG00000024063	111	-2.89	0.00384	0.0148
Zfp469	ENSMUSG00000043903	90	-2.89	0.00384	0.0148
Inppl1	ENSMUSG00000032737	117	-2.89	0.00388	0.0149
Nup62	ENSMUSG00000109511	115	-2.89	0.00389	0.0149
Prkaca	ENSMUSG00000005469	113	-2.9	0.00376	0.0145
Ppp3ca	ENSMUSG00000028161	115	-2.91	0.00358	0.0141
Tfam	ENSMUSG00000003923	119	-2.91	0.00366	0.0142
Fam129b	ENSMUSG00000026796	113	-2.91	0.00365	0.0142
Zfp593	ENSMUSG00000028840	121	-2.91	0.00366	0.0142
Necap2	ENSMUSG00000028923	114	-2.91	0.00363	0.0142
Cdc42se2	ENSMUSG00000052298	132	-2.91	0.00366	0.0142
Ckap4	ENSMUSG00000046841	112	-2.92	0.00347	0.0138
Mrpl42	ENSMUSG00000062981	113	-2.92	0.00347	0.0138
Capns1	ENSMUSG00000001794	119	-2.92	0.00353	0.0139
Anxa7	ENSMUSG00000021814	111	-2.92	0.00352	0.0139
Coro1b	ENSMUSG00000024835	110	-2.92	0.00351	0.0139
Fubp3	ENSMUSG00000026843	126	-2.92	0.00354	0.0139
Stoml2	ENSMUSG00000028455	111	-2.92	0.0035	0.0139
Slco2a1	ENSMUSG00000032548	68	-2.92	0.0035	0.0139
Rbbp4	ENSMUSG00000057236	122	-2.93	0.00334	0.0134
Dlst	ENSMUSG00000004789	117	-2.93	0.00335	0.0135
Adipor1	ENSMUSG00000026457	114	-2.93	0.00342	0.0137
Grk6	ENSMUSG00000074886	119	-2.93	0.00344	0.0137
Calr	ENSMUSG00000003814	158	-2.94	0.00325	0.0131
Hspb1	ENSMUSG00000004951	125	-2.94	0.00332	0.0134
Cldn10	ENSMUSG00000022132	131	-2.94	0.00331	0.0134
Id1	ENSMUSG00000042745	125	-2.95	0.00313	0.0129
Hbegf	ENSMUSG00000024486	121	-2.95	0.00317	0.013
P4hb	ENSMUSG00000025130	113	-2.95	0.00317	0.013
Tsfm	ENSMUSG00000040521	115	-2.95	0.00319	0.013
Scfd1	ENSMUSG00000020952	116	-2.95	0.00321	0.0131
Itga6	ENSMUSG00000027111	35	-2.95	0.00323	0.0131
Gnai2	ENSMUSG00000032562	119	-2.95	0.00321	0.0131
Safb	ENSMUSG00000071054	110	-2.95	0.00322	0.0131
Bcap31	ENSMUSG00000002015	118	-2.96	0.00307	0.0127
Sub1	ENSMUSG00000022205	122	-2.96	0.00305	0.0127
Gtf2e2	ENSMUSG00000031585	116	-2.96	0.00306	0.0127
Tmed1	ENSMUSG00000032180	114	-2.96	0.00306	0.0127
Wdr77	ENSMUSG00000000561	116	-2.96	0.00311	0.0128
Ubc	ENSMUSG00000008348	170	-2.96	0.00313	0.0129
Stx3	ENSMUSG00000041488	146	-2.97	0.00294	0.0123
Zmat3	ENSMUSG00000027663	112	-2.97	0.00298	0.0124
Plp2	ENSMUSG00000031146	111	-2.97	0.00298	0.0124
Trappc4	ENSMUSG00000032112	123	-2.97	0.00298	0.0124
Prkacb	ENSMUSG00000005034	117	-2.98	0.00288	0.0121
G3bp1	ENSMUSG00000018583	110	-2.98	0.00289	0.0121
Clns1a	ENSMUSG00000025439	112	-2.99	0.00276	0.0117
Ncoa4	ENSMUSG00000056234	89	-2.99	0.00277	0.0117
Psmc3	ENSMUSG00000002102	112	-3	0.00271	0.0115
C1qbp	ENSMUSG00000018446	113	-3	0.00269	0.0115
Pacsin3	ENSMUSG00000027257	130	-3	0.00268	0.0115
Syt12	ENSMUSG00000049303	40	-3	0.00271	0.0115
Nab2	ENSMUSG00000025402	113	-3.01	0.00257	0.0111
Psip1	ENSMUSG00000028484	114	-3.01	0.00259	0.0111
Meis1	ENSMUSG00000020160	120	-3.02	0.00249	0.0108
Rela	ENSMUSG00000024927	115	-3.02	0.0025	0.0108
Tax1bp3	ENSMUSG00000040158	115	-3.02	0.0025	0.0108
Zfp64	ENSMUSG00000027551	144	-3.02	0.00254	0.011
Uba3	ENSMUSG00000030061	121	-3.02	0.00255	0.011
Gpm6a	ENSMUSG00000031517	93	-3.02	0.00254	0.011
Ccrl2	ENSMUSG00000043953	43	-3.02	0.00256	0.011
Rab5c	ENSMUSG00000019173	110	-3.03	0.00241	0.0106
Zfand6	ENSMUSG00000030629	111	-3.03	0.00242	0.0106
Stra6	ENSMUSG00000032327	74	-3.03	0.00241	0.0106
Nono	ENSMUSG00000031311	117	-3.03	0.00244	0.0107
Srsf2	ENSMUSG00000034120	117	-3.03	0.00243	0.0107
Msln	ENSMUSG00000063011	91	-3.03	0.00246	0.0108
Etv6	ENSMUSG00000030199	130	-3.04	0.00236	0.0105
Siah2	ENSMUSG00000036432	133	-3.04	0.00237	0.0105
Sertad2	ENSMUSG00000049800	117	-3.04	0.00236	0.0105
Ddx5	ENSMUSG00000020719	118	-3.04	0.00239	0.0106
Ssrp1	ENSMUSG00000027067	116	-3.04	0.00239	0.0106
Akt2	ENSMUSG00000004056	114	-3.05	0.00228	0.0102
Slc3a2	ENSMUSG00000010095	112	-3.05	0.00228	0.0102
Hnrnpdl	ENSMUSG00000029328	114	-3.05	0.00228	0.0102
Polr3k	ENSMUSG00000038628	111	-3.05	0.00225	0.0102
Zfpm1	ENSMUSG00000049577	130	-3.05	0.0023	0.0103
Prdx3	ENSMUSG00000024997	112	-3.05	0.00232	0.0104
Sod2	ENSMUSG00000006818	113	-3.06	0.00221	0.01
Tef	ENSMUSG00000022389	54	-3.06	0.00222	0.01
Plin2	ENSMUSG00000028494	111	-3.06	0.00222	0.01
Bhlhe41	ENSMUSG00000030256	71	-3.06	0.00221	0.01
Hmgn5	ENSMUSG00000031245	115	-3.06	0.00221	0.01
Msx1	ENSMUSG00000048450	157	-3.06	0.00222	0.01
Eif2b1	ENSMUSG00000029388	113	-3.07	0.00211	0.00975
Bhlhe40	ENSMUSG00000030103	111	-3.07	0.00214	0.00983
Mcm7	ENSMUSG00000029730	124	-3.07	0.00216	0.00994
Gpc4	ENSMUSG00000031119	130	-3.08	0.00205	0.00954
Slc4a7	ENSMUSG00000021733	137	-3.08	0.00209	0.00965
Zfp322a	ENSMUSG00000046351	137	-3.08	0.00209	0.00965
[truncated: 325 more rows]

## Sheet: MRs_mouse_apCAFs
mgi_symbol	Regulon	Size	NES	p.value	FDR
Nfe2l3	ENSMUSG00000029832	188	7.12	1.08e-12	2.51e-09
Atp9a	ENSMUSG00000027546	118	6.82	8.8e-12	1.02e-08
Nkain4	ENSMUSG00000027574	194	6.61	3.87e-11	2.42e-08
Trem2	ENSMUSG00000023992	109	6.6	4.17e-11	2.42e-08
Net1	ENSMUSG00000021215	130	6.44	1.19e-10	5.53e-08
Bnc1	ENSMUSG00000025105	135	5.84	5.15e-09	1.71e-06
Zfp467	ENSMUSG00000068551	109	5.7	1.2e-08	3.49e-06
Gjb3	ENSMUSG00000042367	86	5.67	1.43e-08	3.7e-06
Cxadr	ENSMUSG00000022865	253	5.6	2.11e-08	4.89e-06
Ncoa4	ENSMUSG00000056234	89	5.56	2.7e-08	5.39e-06
Adgrg2	ENSMUSG00000031298	86	5.55	2.78e-08	5.39e-06
Cd74	ENSMUSG00000024610	96	5.53	3.26e-08	5.76e-06
Hspb1	ENSMUSG00000004951	125	5.52	3.47e-08	5.76e-06
Slc39a8	ENSMUSG00000053897	133	5.48	4.18e-08	6.48e-06
Eno3	ENSMUSG00000060600	133	5.47	4.49e-08	6.53e-06
Epha2	ENSMUSG00000006445	33	5.43	5.68e-08	7.77e-06
Folr1	ENSMUSG00000001827	121	5.37	8.01e-08	9.8e-06
Bcam	ENSMUSG00000002980	128	5.34	9.18e-08	1.07e-05
Cers4	ENSMUSG00000008206	139	5.33	9.75e-08	1.08e-05
Myrf	ENSMUSG00000036098	116	5.29	1.22e-07	1.29e-05
Slc9a3r1	ENSMUSG00000020733	144	5.23	1.7e-07	1.72e-05
Prkcz	ENSMUSG00000029053	99	5.16	2.45e-07	2.28e-05
F11r	ENSMUSG00000038235	152	5.13	2.95e-07	2.63e-05
Adgrg1	ENSMUSG00000031785	25	5.1	3.42e-07	2.94e-05
Ezr	ENSMUSG00000052397	137	5.06	4.19e-07	3.48e-05
Irf5	ENSMUSG00000029771	78	5.04	4.67e-07	3.74e-05
Pkia	ENSMUSG00000027499	152	4.98	6.44e-07	4.99e-05
Arrdc1	ENSMUSG00000026972	150	4.96	6.87e-07	5.03e-05
Gjb5	ENSMUSG00000042357	158	4.96	6.93e-07	5.03e-05
H2-Ab1	ENSMUSG00000073421	134	4.94	7.7e-07	5.42e-05
Barx1	ENSMUSG00000021381	135	4.77	1.83e-06	0.000109
Cd14	ENSMUSG00000051439	98	4.76	1.98e-06	0.000111
Abcb1b	ENSMUSG00000028970	130	4.75	2.04e-06	0.000111
Scarb1	ENSMUSG00000037936	137	4.75	2.05e-06	0.000111
Sez6l	ENSMUSG00000058153	25	4.75	2.01e-06	0.000111
Bmp4	ENSMUSG00000021835	86	4.67	3.02e-06	0.000159
Cav1	ENSMUSG00000007655	148	4.66	3.14e-06	0.000162
Wt1	ENSMUSG00000016458	120	4.58	4.75e-06	0.000225
Emp3	ENSMUSG00000040212	129	4.55	5.4e-06	0.000248
Kdr	ENSMUSG00000062960	35	4.55	5.45e-06	0.000248
Npm1	ENSMUSG00000057113	115	4.49	7.08e-06	0.000305
Krt19	ENSMUSG00000020911	137	4.48	7.56e-06	0.000307
Itga6	ENSMUSG00000027111	35	4.48	7.43e-06	0.000307
Zbtb8a	ENSMUSG00000028807	124	4.47	7.67e-06	0.000307
Sorbs2	ENSMUSG00000031626	99	4.45	8.71e-06	0.000337
S100a1	ENSMUSG00000044080	120	4.45	8.55e-06	0.000337
Esam	ENSMUSG00000001946	73	4.4	1.06e-05	0.000405
Klf5	ENSMUSG00000005148	28	4.39	1.11e-05	0.000417
Cav2	ENSMUSG00000000058	109	4.37	1.24e-05	0.000448
Atp1b1	ENSMUSG00000026576	140	4.37	1.25e-05	0.000448
Gpm6a	ENSMUSG00000031517	93	4.37	1.23e-05	0.000448
Anxa8	ENSMUSG00000021950	128	4.34	1.42e-05	0.000479
Dbi	ENSMUSG00000026385	116	4.34	1.42e-05	0.000479
Enpp4	ENSMUSG00000023961	57	4.33	1.51e-05	0.0005
Tesc	ENSMUSG00000029359	154	4.32	1.55e-05	0.000507
Cldn10	ENSMUSG00000022132	131	4.29	1.81e-05	0.000568
Mbp	ENSMUSG00000041607	74	4.29	1.77e-05	0.000568
Zcchc3	ENSMUSG00000074682	133	4.29	1.8e-05	0.000568
Slc38a4	ENSMUSG00000022464	60	4.28	1.86e-05	0.000569
Tjp2	ENSMUSG00000024812	81	4.27	2e-05	0.000602
Baiap2l1	ENSMUSG00000038859	129	4.24	2.2e-05	0.000647
Met	ENSMUSG00000009376	44	4.22	2.4e-05	0.000688
Cd2ap	ENSMUSG00000061665	119	4.18	2.91e-05	0.000825
Lsr	ENSMUSG00000001247	101	4.17	3.01e-05	0.000842
Sema4b	ENSMUSG00000030539	131	4.16	3.15e-05	0.000852
Nkd1	ENSMUSG00000031661	116	4.16	3.14e-05	0.000852
Cdh3	ENSMUSG00000061048	106	4.16	3.15e-05	0.000852
Ccrl2	ENSMUSG00000043953	43	4.15	3.39e-05	0.000906
Chaf1b	ENSMUSG00000022945	71	4.14	3.44e-05	0.000909
Tgif2	ENSMUSG00000062175	133	4.13	3.64e-05	0.00095
Efnb2	ENSMUSG00000001300	146	4.12	3.73e-05	0.000964
Anxa2	ENSMUSG00000032231	185	4.05	5.04e-05	0.00127
Slc38a1	ENSMUSG00000023169	128	4.03	5.52e-05	0.00136
Aplp1	ENSMUSG00000006651	117	4.02	5.84e-05	0.00141
Spint2	ENSMUSG00000074227	115	4.01	6.1e-05	0.00145
Cldn3	ENSMUSG00000070473	34	3.98	6.96e-05	0.00162
Plek2	ENSMUSG00000021118	41	3.94	8.01e-05	0.00181
Plxna4	ENSMUSG00000029765	163	3.92	8.78e-05	0.00194
Gata5	ENSMUSG00000015627	68	3.9	9.58e-05	0.00206
Cryl1	ENSMUSG00000021947	135	3.88	0.000106	0.00225
Sytl1	ENSMUSG00000028860	33	3.87	0.00011	0.0023
Hspa8	ENSMUSG00000015656	140	3.85	0.000118	0.00243
Msln	ENSMUSG00000063011	91	3.85	0.000119	0.00243
Afap1l2	ENSMUSG00000025083	91	3.83	0.000126	0.00254
H2-Aa	ENSMUSG00000036594	26	3.83	0.000127	0.00254
Tmem88	ENSMUSG00000045377	116	3.83	0.000129	0.00257
Mcm7	ENSMUSG00000029730	124	3.82	0.000134	0.00264
Slc16a4	ENSMUSG00000027896	71	3.8	0.000142	0.00278
Zbtb7c	ENSMUSG00000044646	140	3.77	0.000163	0.00316
Ptger3	ENSMUSG00000040016	123	3.75	0.000177	0.00338
Plscr2	ENSMUSG00000032372	112	3.69	0.000223	0.00404
Irgm1	ENSMUSG00000046879	153	3.69	0.000227	0.00409
Btf3	ENSMUSG00000021660	115	3.65	0.000257	0.0046
Fosl1	ENSMUSG00000024912	127	3.65	0.00026	0.00462
Sox12	ENSMUSG00000051817	134	3.65	0.000262	0.00462
Ptger2	ENSMUSG00000037759	98	3.64	0.00027	0.00467
Cd200	ENSMUSG00000022661	113	3.63	0.000282	0.00483
Cldn15	ENSMUSG00000001739	76	3.6	0.000317	0.0053
Upk3b	ENSMUSG00000042985	170	3.6	0.000319	0.0053
Prkg2	ENSMUSG00000029334	141	3.6	0.000322	0.00531
Cdh2	ENSMUSG00000024304	112	3.57	0.000351	0.0057
Ptk2b	ENSMUSG00000059456	126	3.57	0.000353	0.0057
Gapdh	ENSMUSG00000057666	251	3.55	0.000381	0.00595
Lmcd1	ENSMUSG00000057604	92	3.52	0.000434	0.00664
Clic1	ENSMUSG00000007041	121	3.49	0.000485	0.00719
Zfp428	ENSMUSG00000064264	126	3.48	0.000493	0.00721
Cryab	ENSMUSG00000032060	116	3.47	0.000522	0.00749
Stxbp2	ENSMUSG00000004626	127	3.47	0.000528	0.00753
Map3k1	ENSMUSG00000021754	129	3.44	0.000578	0.00804
Cd1d1	ENSMUSG00000028076	148	3.44	0.000587	0.00813
Rgs10	ENSMUSG00000030844	123	3.41	0.000653	0.00898
Pcyox1	ENSMUSG00000029998	119	3.4	0.000679	0.00917
Gpi1	ENSMUSG00000036427	123	3.38	0.000717	0.00958
Daglb	ENSMUSG00000039206	143	3.37	0.000762	0.00995
Rab40b	ENSMUSG00000025170	150	3.34	0.000835	0.0106
Efna2	ENSMUSG00000003070	127	3.32	0.000916	0.0114
Zfpm1	ENSMUSG00000049577	130	3.31	0.000949	0.0117
Ddr1	ENSMUSG00000003534	116	3.3	0.00098	0.012
Noct	ENSMUSG00000023087	126	3.3	0.00098	0.012
Clcn3	ENSMUSG00000004319	143	3.29	0.00101	0.0122
Pmf1	ENSMUSG00000028066	120	3.26	0.00112	0.0134
Tsc22d1	ENSMUSG00000022010	112	3.23	0.00123	0.0144
Csdc2	ENSMUSG00000042109	56	3.21	0.00135	0.0155
Zfp57	ENSMUSG00000036036	53	3.2	0.00136	0.0155
Pfn1	ENSMUSG00000018293	185	3.2	0.00137	0.0156
Mcm5	ENSMUSG00000005410	125	3.19	0.0014	0.0158
Snx5	ENSMUSG00000027423	111	3.19	0.00144	0.0161
Slc20a2	ENSMUSG00000037656	141	3.18	0.00147	0.0163
Arrb2	ENSMUSG00000060216	110	3.18	0.00149	0.0163
Ephb6	ENSMUSG00000029869	36	3.16	0.00155	0.0168
Anp32a	ENSMUSG00000032249	120	3.16	0.00157	0.017
Mras	ENSMUSG00000032470	126	3.16	0.00158	0.017
Plcl1	ENSMUSG00000038349	82	3.16	0.0016	0.0171
Arl4d	ENSMUSG00000034936	32	3.15	0.00163	0.0173
Vamp8	ENSMUSG00000050732	121	3.15	0.00163	0.0173
Atp1b2	ENSMUSG00000041329	132	3.13	0.00172	0.0182
Hsp90aa1	ENSMUSG00000021270	117	3.13	0.00177	0.0185
Vcam1	ENSMUSG00000027962	117	3.1	0.00194	0.0199
Uhrf1	ENSMUSG00000001228	146	3.09	0.00201	0.0204
Msh6	ENSMUSG00000005370	89	3.09	0.00202	0.0204
Shb	ENSMUSG00000044813	126	3.08	0.00205	0.0206
Phb2	ENSMUSG00000004264	112	3.08	0.00208	0.0209
Fscn1	ENSMUSG00000029581	111	3.07	0.00214	0.0211
Pkm	ENSMUSG00000032294	207	3.07	0.00212	0.0211
Best1	ENSMUSG00000037418	134	3.07	0.00217	0.0214
Plin2	ENSMUSG00000028494	111	3.04	0.00234	0.0227
Prdx2	ENSMUSG00000005161	118	3.03	0.00244	0.0235
Smad6	ENSMUSG00000036867	91	3.03	0.00243	0.0235
Zfp706	ENSMUSG00000062397	113	3.03	0.00248	0.0238
Stx3	ENSMUSG00000041488	146	3.01	0.0026	0.0249
Park7	ENSMUSG00000028964	121	3.01	0.00263	0.025
Mink1	ENSMUSG00000020827	91	2.98	0.00284	0.0262
Atp5b	ENSMUSG00000025393	127	2.98	0.00284	0.0262
Raet1e	ENSMUSG00000053219	100	2.98	0.00284	0.0262
Atp1a1	ENSMUSG00000033161	109	2.98	0.00293	0.0268
Eef2	ENSMUSG00000034994	139	2.96	0.00311	0.0279
Tlcd1	ENSMUSG00000019437	94	2.95	0.00319	0.0281
Dab2	ENSMUSG00000022150	118	2.95	0.00317	0.0281
Slc16a1	ENSMUSG00000032902	115	2.95	0.00316	0.0281
Fnbp1l	ENSMUSG00000039735	39	2.95	0.00319	0.0281
Zfp579	ENSMUSG00000051550	131	2.93	0.00338	0.0294
Capns1	ENSMUSG00000001794	119	2.93	0.0034	0.0295
Paxbp1	ENSMUSG00000022974	147	2.92	0.00348	0.03
Crabp2	ENSMUSG00000004885	76	2.91	0.0036	0.0309
Hdac6	ENSMUSG00000031161	81	2.89	0.00381	0.032
Efna5	ENSMUSG00000048915	113	2.89	0.0038	0.032
Cul4b	ENSMUSG00000031095	137	2.88	0.00396	0.033
Mdh2	ENSMUSG00000019179	114	2.88	0.00402	0.0332
Vdac1	ENSMUSG00000020402	113	2.88	0.00401	0.0332
Abcg2	ENSMUSG00000029802	117	2.86	0.00426	0.0348
Inpp5k	ENSMUSG00000006127	151	2.85	0.0044	0.0352
Lrpprc	ENSMUSG00000024120	125	2.85	0.00441	0.0352
Nr4a2	ENSMUSG00000026826	134	2.85	0.00442	0.0352
Zfand1	ENSMUSG00000039795	138	2.84	0.00445	0.0353
Trim25	ENSMUSG00000000275	154	2.84	0.00452	0.0357
Sap30bp	ENSMUSG00000020755	115	2.83	0.00467	0.0367
Psip1	ENSMUSG00000028484	114	2.83	0.00472	0.0369
Pkn1	ENSMUSG00000057672	124	2.79	0.00521	0.0402
Dapp1	ENSMUSG00000028159	125	2.79	0.00532	0.0408
Cyld	ENSMUSG00000036712	150	2.78	0.00545	0.0417
Csf1r	ENSMUSG00000024621	68	2.77	0.0056	0.0422
Ell2	ENSMUSG00000001542	31	2.76	0.0058	0.0431
Rac1	ENSMUSG00000001847	120	2.76	0.00581	0.0431
Rab11a	ENSMUSG00000004771	128	2.75	0.00589	0.0434
Gdf6	ENSMUSG00000051279	121	2.75	0.00587	0.0434
Edf1	ENSMUSG00000015092	118	2.75	0.00598	0.0438
Hscb	ENSMUSG00000043510	136	2.74	0.00617	0.0449
Zfp593	ENSMUSG00000028840	121	2.74	0.00619	0.045
Zc3h12a	ENSMUSG00000042677	150	2.74	0.00623	0.0451
Hmgb2	ENSMUSG00000054717	110	2.73	0.00643	0.0464
Cit	ENSMUSG00000029516	82	2.72	0.00661	0.0474
Zfp263	ENSMUSG00000022529	98	2.71	0.00681	0.0482
Hnrnpab	ENSMUSG00000020358	110	2.69	0.00707	0.0495
Pnpla2	ENSMUSG00000025509	148	2.69	0.00707	0.0495
Atp5a1	ENSMUSG00000025428	117	2.69	0.00719	0.0501
Ptprf	ENSMUSG00000033295	114	2.69	0.00717	0.0501
Cln3	ENSMUSG00000030720	121	2.68	0.00743	0.0516
Bsg	ENSMUSG00000023175	135	2.67	0.00752	0.0519
Xpr1	ENSMUSG00000026469	140	2.67	0.00754	0.0519
Nono	ENSMUSG00000031311	117	2.67	0.00768	0.0525
Gata6	ENSMUSG00000005836	116	2.66	0.00779	0.0531
Ran	ENSMUSG00000029430	117	2.64	0.00824	0.0549
Sap30	ENSMUSG00000031609	118	2.64	0.00823	0.0549
Hoxa5	ENSMUSG00000038253	124	2.64	0.00832	0.0552
Mcm3	ENSMUSG00000041859	126	2.63	0.00853	0.0565
Top2a	ENSMUSG00000020914	123	2.62	0.00869	0.0572
Mcm2	ENSMUSG00000002870	118	2.62	0.00875	0.0574
Fas	ENSMUSG00000024778	116	2.62	0.00881	0.0575
Tspan5	ENSMUSG00000028152	113	2.61	0.00916	0.0594
Adcyap1r1	ENSMUSG00000029778	41	2.6	0.00937	0.0601
Cdh11	ENSMUSG00000031673	117	2.6	0.00938	0.0601
Gas1	ENSMUSG00000052957	116	2.6	0.00933	0.0601
Mpzl2	ENSMUSG00000032092	71	2.57	0.0101	0.0639
Bcap31	ENSMUSG00000002015	118	2.57	0.0102	0.0641
Ifitm3	ENSMUSG00000025492	233	2.57	0.0102	0.0643
Zfp64	ENSMUSG00000027551	144	2.56	0.0104	0.0653
Ppp3ca	ENSMUSG00000028161	115	2.56	0.0105	0.0658
Klf11	ENSMUSG00000020653	108	2.56	0.0106	0.0659
Kdm4a	ENSMUSG00000033326	90	2.56	0.0106	0.0659
Trip13	ENSMUSG00000021569	124	2.55	0.0108	0.0671
Atp2b4	ENSMUSG00000026463	134	2.55	0.0109	0.0673
Zdhhc12	ENSMUSG00000015335	125	2.54	0.011	0.0676
Ywhah	ENSMUSG00000018965	107	2.54	0.011	0.0676
Ap2s1	ENSMUSG00000008036	111	2.54	0.0112	0.0682
Fen1	ENSMUSG00000024742	57	2.54	0.0112	0.0683
Tfdp2	ENSMUSG00000032411	117	2.53	0.0113	0.0685
Cep89	ENSMUSG00000023072	146	2.53	0.0115	0.069
Ppp1r13l	ENSMUSG00000040734	85	2.52	0.0117	0.07
Sgms1	ENSMUSG00000040451	121	2.52	0.0118	0.0705
Bambi	ENSMUSG00000024232	123	2.51	0.0121	0.0714
Bcl10	ENSMUSG00000028191	111	2.51	0.0121	0.0714
Nedd8	ENSMUSG00000010376	116	2.51	0.0122	0.0719
Mpp6	ENSMUSG00000038388	116	2.5	0.0124	0.0721
Itgb3bp	ENSMUSG00000028549	139	2.5	0.0124	0.0722
Csrnp1	ENSMUSG00000032515	109	2.49	0.0129	0.0749
Creg1	ENSMUSG00000040713	121	2.48	0.0132	0.0762
Il1r2	ENSMUSG00000026073	145	2.47	0.0135	0.0777
Hdac5	ENSMUSG00000008855	119	2.45	0.0141	0.0805
Tigd2	ENSMUSG00000049232	138	2.45	0.0144	0.0818
Nedd1	ENSMUSG00000019988	160	2.45	0.0145	0.0819
Elp2	ENSMUSG00000024271	114	2.44	0.0146	0.0823
Tpcn1	ENSMUSG00000032741	60	2.44	0.0147	0.0829
Kat8	ENSMUSG00000030801	127	2.44	0.0149	0.0837
Ssrp1	ENSMUSG00000027067	116	2.43	0.015	0.0844
Gtf2h4	ENSMUSG00000001524	133	2.43	0.0152	0.085
Hoxc4	ENSMUSG00000075394	126	2.43	0.0152	0.0851
Dgka	ENSMUSG00000025357	109	2.41	0.0159	0.088
Hfe	ENSMUSG00000006611	132	2.41	0.016	0.0885
Asf1b	ENSMUSG00000005470	122	2.4	0.0162	0.0892
Gstp1	ENSMUSG00000060803	146	2.4	0.0162	0.0892
Rbbp7	ENSMUSG00000031353	112	2.4	0.0165	0.0901
Trib1	ENSMUSG00000032501	113	2.4	0.0165	0.0901
Lrrc8c	ENSMUSG00000054720	120	2.4	0.0165	0.0901
H2-Ke6	ENSMUSG00000073422	122	2.39	0.0168	0.0914
Ifi30	ENSMUSG00000031838	117	2.38	0.0172	0.0934
Mrpl42	ENSMUSG00000062981	113	2.38	0.0172	0.0934
Atp6v0a1	ENSMUSG00000019302	135	2.38	0.0173	0.0936
Cbx4	ENSMUSG00000039989	114	2.38	0.0175	0.0943
Ripk3	ENSMUSG00000022221	114	2.37	0.0176	0.0943
Pard6a	ENSMUSG00000005699	132	2.37	0.0177	0.0948
Slc16a3	ENSMUSG00000025161	190	2.37	0.0177	0.0948
Hyal2	ENSMUSG00000010047	110	2.37	0.0178	0.095
Tcea3	ENSMUSG00000001604	112	2.37	0.0179	0.0954
Pycard	ENSMUSG00000030793	111	2.37	0.018	0.0956
Taf7	ENSMUSG00000051316	145	2.36	0.0182	0.0962
Des	ENSMUSG00000026208	117	2.34	0.0191	0.0994
Il4ra	ENSMUSG00000030748	117	2.34	0.019	0.0994
Rpsa	ENSMUSG00000032518	174	2.34	0.019	0.0994
Klf10	ENSMUSG00000037465	113	2.33	0.0197	0.102
Cdc42	ENSMUSG00000006699	113	2.32	0.0204	0.104
Rab5c	ENSMUSG00000019173	110	2.32	0.0205	0.104
Meis1	ENSMUSG00000020160	120	2.32	0.0204	0.104
Vamp3	ENSMUSG00000028955	124	2.32	0.0204	0.104
Tpcn2	ENSMUSG00000048677	137	2.32	0.0205	0.104
Cenpk	ENSMUSG00000021714	38	2.31	0.0208	0.105
Guca1a	ENSMUSG00000023982	129	2.31	0.0207	0.105
Racgap1	ENSMUSG00000023015	192	2.31	0.0209	0.106
Tax1bp3	ENSMUSG00000040158	115	2.3	0.0212	0.107
Steap1	ENSMUSG00000015652	109	2.3	0.0215	0.108
Ptpn13	ENSMUSG00000034573	134	2.29	0.0219	0.11
Smarce1	ENSMUSG00000037935	110	2.29	0.022	0.11
Marcksl1	ENSMUSG00000047945	124	2.29	0.0221	0.11
Amer1	ENSMUSG00000050332	140	2.29	0.0222	0.11
Eny2	ENSMUSG00000022338	119	2.28	0.0227	0.112
Tob1	ENSMUSG00000037573	114	2.27	0.023	0.113
Tarbp2	ENSMUSG00000023051	126	2.27	0.0234	0.114
Ppp1ca	ENSMUSG00000040385	115	2.27	0.0232	0.114
Tgif1	ENSMUSG00000047407	113	2.27	0.0231	0.114
Jup	ENSMUSG00000001552	129	2.26	0.0239	0.116
Ewsr1	ENSMUSG00000009079	113	2.26	0.0237	0.116
Gtf2h2	ENSMUSG00000021639	138	2.26	0.0237	0.116
Eif5	ENSMUSG00000021282	113	2.26	0.0241	0.117
Vim	ENSMUSG00000026728	222	2.26	0.024	0.117
Chmp1a	ENSMUSG00000000743	114	2.25	0.0242	0.117
Ppp2r1a	ENSMUSG00000007564	113	2.25	0.0243	0.117
Slc4a7	ENSMUSG00000021733	137	2.25	0.0242	0.117
Cnp	ENSMUSG00000006782	129	2.25	0.0246	0.118
Hdgf	ENSMUSG00000004897	112	2.24	0.0251	0.119
Sqstm1	ENSMUSG00000015837	110	2.24	0.025	0.119
Siah2	ENSMUSG00000036432	133	2.24	0.025	0.119
Polr3k	ENSMUSG00000038628	111	2.24	0.025	0.119
Slc2a1	ENSMUSG00000028645	114	2.23	0.0259	0.122
Ripk2	ENSMUSG00000041135	125	2.23	0.0258	0.122
Tnfrsf12a	ENSMUSG00000023905	111	2.2	0.0276	0.129
Calm1	ENSMUSG00000001175	123	2.2	0.0277	0.13
Cic	ENSMUSG00000005442	134	2.2	0.0278	0.13
Zfp277	ENSMUSG00000055917	118	2.2	0.0281	0.131
Taf1d	ENSMUSG00000031939	124	2.18	0.0292	0.135
Prc1	ENSMUSG00000038943	139	2.18	0.0291	0.135
Sin3b	ENSMUSG00000031622	112	2.18	0.0296	0.136
Ptov1	ENSMUSG00000038502	122	2.18	0.0295	0.136
Rbbp8	ENSMUSG00000041238	122	2.17	0.0296	0.136
Hspd1	ENSMUSG00000025980	113	2.17	0.0301	0.138
Brd4	ENSMUSG00000024002	118	2.16	0.0304	0.139
Nab2	ENSMUSG00000025402	113	2.16	0.0309	0.14
Tceal8	ENSMUSG00000051579	113	2.16	0.0306	0.14
Rrp8	ENSMUSG00000030888	129	2.15	0.0312	0.142
Melk	ENSMUSG00000035683	95	2.15	0.0319	0.144
Snta1	ENSMUSG00000027488	117	2.14	0.032	0.145
Hipk2	ENSMUSG00000061436	135	2.14	0.0322	0.145
Fam168b	ENSMUSG00000037503	116	2.13	0.0328	0.147
Ube2i	ENSMUSG00000015120	116	2.13	0.0331	0.148
Cnot9	ENSMUSG00000026174	34	2.13	0.033	0.148
Actn1	ENSMUSG00000015143	109	2.13	0.0334	0.149
Ajuba	ENSMUSG00000022178	40	2.13	0.0335	0.149
Yes1	ENSMUSG00000014932	140	2.12	0.0338	0.15
Suz12	ENSMUSG00000017548	140	2.12	0.0342	0.151
Ddx39b	ENSMUSG00000019432	112	2.12	0.0342	0.151
Tcf3	ENSMUSG00000020167	116	2.12	0.0343	0.151
Cited2	ENSMUSG00000039910	118	2.11	0.0347	0.153
Rarb	ENSMUSG00000017491	140	2.11	0.035	0.154
Ccna2	ENSMUSG00000027715	146	2.11	0.035	0.154
Stx11	ENSMUSG00000039232	75	2.11	0.0352	0.154
Pdk1	ENSMUSG00000006494	123	2.1	0.0353	0.154
Prkcd	ENSMUSG00000021948	115	2.1	0.0355	0.154
Tgm2	ENSMUSG00000037820	111	2.1	0.0354	0.154
Evc2	ENSMUSG00000050248	139	2.1	0.0355	0.154
Mlkl	ENSMUSG00000012519	157	2.09	0.0366	0.157
Atp5o	ENSMUSG00000022956	116	2.09	0.0364	0.157
Zfp688	ENSMUSG00000045251	66	2.09	0.0363	0.157
Hdac1	ENSMUSG00000028800	111	2.09	0.0371	0.159
Hmox1	ENSMUSG00000005413	116	2.08	0.0372	0.159
G3bp1	ENSMUSG00000018583	110	2.08	0.0373	0.159
Bbx	ENSMUSG00000022641	112	2.08	0.0373	0.159
Ide	ENSMUSG00000056999	122	2.08	0.0371	0.159
Foxm1	ENSMUSG00000001517	60	2.08	0.0378	0.16
Ddx5	ENSMUSG00000020719	118	2.08	0.0377	0.16
Rgs3	ENSMUSG00000059810	116	2.08	0.0376	0.16
Cdk5	ENSMUSG00000028969	114	2.07	0.038	0.161
Pigu	ENSMUSG00000038383	121	2.07	0.0382	0.161
Trp53	ENSMUSG00000059552	110	2.07	0.0382	0.161
Mrgprf	ENSMUSG00000031070	117	2.07	0.0384	0.162
Plscr1	ENSMUSG00000032369	122	2.07	0.0386	0.162
Gpr39	ENSMUSG00000026343	121	2.07	0.0388	0.163
Pear1	ENSMUSG00000028073	115	2.06	0.039	0.163
Syne2	ENSMUSG00000063450	119	2.06	0.0394	0.164
Rtn4	ENSMUSG00000020458	114	2.06	0.0398	0.165
Ctbp2	ENSMUSG00000030970	109	2.06	0.0399	0.165
Ap2m1	ENSMUSG00000022841	116	2.05	0.04	0.165
Cdk2	ENSMUSG00000025358	164	2.05	0.0399	0.165
Syt12	ENSMUSG00000049303	40	2.05	0.0402	0.166
Tada3	ENSMUSG00000048930	112	2.04	0.041	0.169
Zfp207	ENSMUSG00000017421	116	2.04	0.0414	0.17
Rfc1	ENSMUSG00000029191	121	2.04	0.0418	0.171
Plp2	ENSMUSG00000031146	111	2.04	0.0418	0.171
Jam2	ENSMUSG00000053062	120	2.03	0.0424	0.173
Zfp62	ENSMUSG00000046311	75	2.03	0.0426	0.174
Ruvbl2	ENSMUSG00000003868	117	2.02	0.043	0.175
Mcm4	ENSMUSG00000022673	125	2.02	0.0431	0.175
Coro1b	ENSMUSG00000024835	110	2.02	0.0435	0.176
Pa2g4	ENSMUSG00000025364	113	2.01	0.0442	0.178
Hlx	ENSMUSG00000039377	130	2.01	0.0442	0.178
Id1	ENSMUSG00000042745	125	2.01	0.0441	0.178
Mxd3	ENSMUSG00000021485	106	2.01	0.0448	0.18
Lpar6	ENSMUSG00000033446	73	2	0.0454	0.182
Ascc2	ENSMUSG00000020412	139	2	0.0459	0.183
Hoxa7	ENSMUSG00000038236	128	2	0.0457	0.183
Arpc2	ENSMUSG00000006304	118	1.99	0.0462	0.184
Emp2	ENSMUSG00000022505	113	1.99	0.0462	0.184
Cfl1	ENSMUSG00000056201	151	1.99	0.0464	0.184
Ccne1	ENSMUSG00000002068	103	1.99	0.047	0.186
Hint1	ENSMUSG00000020267	123	1.99	0.0469	0.186
Calm2	ENSMUSG00000036438	123	1.99	0.0471	0.186
Flnc	ENSMUSG00000068699	124	1.99	0.0471	0.186
Usp14	ENSMUSG00000047879	109	1.98	0.0472	0.186
Ecd	ENSMUSG00000021810	115	1.98	0.0482	0.189
Vapa	ENSMUSG00000024091	112	1.98	0.0482	0.189
Srebf2	ENSMUSG00000022463	119	1.97	0.0487	0.19
Csf2ra	ENSMUSG00000059326	139	1.97	0.0487	0.19
Mycbp	ENSMUSG00000028647	114	1.97	0.0491	0.191
Cd9	ENSMUSG00000030342	120	1.97	0.0489	0.191
Pick1	ENSMUSG00000068206	28	1.97	0.049	0.191
Acy3	ENSMUSG00000024866	81	1.95	0.0507	0.196
Nradd	ENSMUSG00000032491	112	1.95	0.0508	0.196
Med29	ENSMUSG00000003444	114	1.95	0.0513	0.197
Sorbs3	ENSMUSG00000022091	123	1.95	0.0513	0.197
Tspan4	ENSMUSG00000025511	111	1.95	0.0514	0.197
Yap1	ENSMUSG00000053110	116	1.95	0.0513	0.197
Rbbp4	ENSMUSG00000057236	122	1.95	0.0511	0.197
Skap2	ENSMUSG00000059182	110	1.95	0.0517	0.197
Pfdn1	ENSMUSG00000024346	127	1.94	0.052	0.197
Zfand6	ENSMUSG00000030629	111	1.94	0.0519	0.197
Bclaf1	ENSMUSG00000037608	113	1.94	0.052	0.197
Zmat1	ENSMUSG00000052676	46	1.94	0.0519	0.197
Cct3	ENSMUSG00000001416	113	1.94	0.0525	0.198
C1qbp	ENSMUSG00000018446	113	1.94	0.0523	0.198
Cenpf	ENSMUSG00000026605	95	1.94	0.0522	0.198
Gabpb1	ENSMUSG00000027361	129	1.94	0.0524	0.198
Steap2	ENSMUSG00000015653	114	1.93	0.0533	0.199
Tmem50b	ENSMUSG00000022964	128	1.93	0.053	0.199
Xrcc5	ENSMUSG00000026187	119	1.93	0.0533	0.199
Trim28	ENSMUSG00000005566	109	1.93	0.0535	0.2
Ccnh	ENSMUSG00000021548	110	1.93	0.054	0.201
Tmpo	ENSMUSG00000019961	112	1.92	0.0549	0.204
Snx4	ENSMUSG00000022808	123	1.92	0.0549	0.204
Suclg2	ENSMUSG00000061838	116	1.92	0.0552	0.204
Stat1	ENSMUSG00000026104	118	1.91	0.0557	0.205
Gpd1l	ENSMUSG00000050627	135	1.91	0.0557	0.205
Polr2i	ENSMUSG00000019738	111	1.91	0.0563	0.207
Slc7a8	ENSMUSG00000022180	109	1.91	0.0564	0.207
Hmgn5	ENSMUSG00000031245	115	1.9	0.0569	0.208
Nr1h2	ENSMUSG00000060601	118	1.9	0.0568	0.208
Ube2n	ENSMUSG00000074781	112	1.9	0.0569	0.208
Mfap3	ENSMUSG00000020522	137	1.89	0.0586	0.213
Dvl2	ENSMUSG00000020888	139	1.89	0.0586	0.213
Anxa7	ENSMUSG00000021814	111	1.89	0.0591	0.215
Ehd4	ENSMUSG00000027293	127	1.89	0.0594	0.215
Plgrkt	ENSMUSG00000016495	113	1.88	0.0595	0.215
Dek	ENSMUSG00000021377	114	1.88	0.06	0.215
Mcm6	ENSMUSG00000026355	126	1.88	0.0598	0.215
Nfkbib	ENSMUSG00000030595	117	1.88	0.06	0.215
Ncoa5	ENSMUSG00000039804	130	1.88	0.0597	0.215
Znhit1	ENSMUSG00000059518	111	1.88	0.0604	0.216
Banp	ENSMUSG00000025316	128	1.88	0.0606	0.217
Tpra1	ENSMUSG00000002871	106	1.87	0.061	0.217
Irf3	ENSMUSG00000003184	119	1.87	0.0618	0.22
Nmi	ENSMUSG00000026946	124	1.87	0.0621	0.22
Nfyc	ENSMUSG00000032897	116	1.87	0.0619	0.22
Cc2d1a	ENSMUSG00000036686	132	1.87	0.0619	0.22
Prkar1a	ENSMUSG00000020612	126	1.85	0.0637	0.224
Arid4b	ENSMUSG00000039219	112	1.85	0.064	0.225
Rras2	ENSMUSG00000055723	115	1.84	0.0656	0.229
Glis2	ENSMUSG00000014303	113	1.84	0.066	0.23
Esd	ENSMUSG00000021996	124	1.84	0.0659	0.23
Metap2	ENSMUSG00000036112	110	1.84	0.0658	0.23
Tspyl2	ENSMUSG00000041096	132	1.84	0.0658	0.23
Slc39a10	ENSMUSG00000025986	129	1.83	0.0667	0.232
Gmeb1	ENSMUSG00000028901	59	1.83	0.0672	0.233
Hmbox1	ENSMUSG00000021972	76	1.83	0.0678	0.234
Cdc42ep1	ENSMUSG00000049521	149	1.82	0.0683	0.236
Pld2	ENSMUSG00000020828	128	1.81	0.0699	0.241
Smarcd1	ENSMUSG00000023018	140	1.81	0.0702	0.241
Nup62	ENSMUSG00000109511	115	1.81	0.0702	0.241
Csnk2b	ENSMUSG00000024387	110	1.8	0.0715	0.243
Sfpq	ENSMUSG00000028820	118	1.8	0.0712	0.243
Mybbp1a	ENSMUSG00000040463	114	1.8	0.0713	0.243
Camk2d	ENSMUSG00000053819	113	1.8	0.0726	0.246
Pcgf1	ENSMUSG00000069678	63	1.79	0.0731	0.247
Arid5b	ENSMUSG00000019947	110	1.79	0.0737	0.248
Ddx54	ENSMUSG00000029599	115	1.79	0.0738	0.248
Calm3	ENSMUSG00000019370	115	1.78	0.0747	0.25
Meis2	ENSMUSG00000027210	112	1.78	0.0747	0.25
Elof1	ENSMUSG00000013822	114	1.78	0.0753	0.251
Mxi1	ENSMUSG00000025025	125	1.78	0.0755	0.252
Zzz3	ENSMUSG00000039068	119	1.78	0.0759	0.253
Taf6l	ENSMUSG00000003680	111	1.77	0.0763	0.254
Hnrnpdl	ENSMUSG00000029328	114	1.77	0.0767	0.254
Ascc1	ENSMUSG00000044475	113	1.77	0.0765	0.254
Cd44	ENSMUSG00000005087	120	1.77	0.0771	0.255
Mapk8ip1	ENSMUSG00000027223	135	1.77	0.0771	0.255
Zcchc17	ENSMUSG00000028772	110	1.77	0.0775	0.255
Cnbp	ENSMUSG00000030057	122	1.77	0.0775	0.255
Trps1	ENSMUSG00000038679	113	1.77	0.0774	0.255
Cdc42ep2	ENSMUSG00000045664	132	1.76	0.0777	0.255
Ing4	ENSMUSG00000030330	127	1.76	0.0781	0.256
Ddx58	ENSMUSG00000040296	143	1.76	0.0782	0.256
Psma4	ENSMUSG00000032301	118	1.76	0.0788	0.258
Nsd2	ENSMUSG00000057406	144	1.76	0.0791	0.258
Neu1	ENSMUSG00000007038	130	1.75	0.0793	0.258
Polr2a	ENSMUSG00000005198	134	1.75	0.0802	0.259
Ets2	ENSMUSG00000022895	145	1.75	0.08	0.259
Hras	ENSMUSG00000025499	120	1.75	0.0795	0.259
Srsf10	ENSMUSG00000028676	112	1.75	0.0801	0.259
Cib1	ENSMUSG00000030538	109	1.75	0.0801	0.259
Wdr6	ENSMUSG00000066357	120	1.75	0.0801	0.259
Dmap1	ENSMUSG00000009640	118	1.75	0.0808	0.26
Nufip1	ENSMUSG00000022009	120	1.75	0.0805	0.26
Zfp771	ENSMUSG00000054716	115	1.75	0.0808	0.26
Tmed10	ENSMUSG00000021248	118	1.74	0.081	0.26
Stx7	ENSMUSG00000019998	113	1.74	0.0824	0.263
Usf1	ENSMUSG00000026641	111	1.74	0.0823	0.263
Phb	ENSMUSG00000038845	111	1.74	0.0823	0.263
Dnmt1	ENSMUSG00000004099	152	1.73	0.0831	0.265
Gle1	ENSMUSG00000019715	119	1.73	0.0838	0.266
Mrrf	ENSMUSG00000026887	115	1.73	0.0842	0.267
Vasp	ENSMUSG00000030403	113	1.73	0.0841	0.267
Rabepk	ENSMUSG00000070953	114	1.73	0.0843	0.267
Ehd2	ENSMUSG00000074364	120	1.72	0.0848	0.267
Cby1	ENSMUSG00000022428	114	1.72	0.085	0.268
Katnb1	ENSMUSG00000031787	151	1.72	0.0852	0.268
Elp3	ENSMUSG00000022031	118	1.72	0.0858	0.27
Smarca5	ENSMUSG00000031715	109	1.72	0.0863	0.27
Ckap4	ENSMUSG00000046841	112	1.72	0.0863	0.27
Flad1	ENSMUSG00000042642	129	1.71	0.0865	0.27
Rexo4	ENSMUSG00000052406	134	1.7	0.0895	0.279
Gps2	ENSMUSG00000023170	119	1.7	0.0901	0.28
Nup85	ENSMUSG00000020739	128	1.69	0.0901	0.28
Psmc3	ENSMUSG00000002102	112	1.69	0.0919	0.281
Khdrbs1	ENSMUSG00000028790	116	1.69	0.0916	0.281
Cux1	ENSMUSG00000029705	113	1.69	0.091	0.281
Tdg	ENSMUSG00000034674	111	1.69	0.0913	0.281
Erf	ENSMUSG00000040857	116	1.69	0.0908	0.281
Cdc42se2	ENSMUSG00000052298	132	1.69	0.0916	0.281
Gon4l	ENSMUSG00000054199	149	1.69	0.0918	0.281
Rnd1	ENSMUSG00000054855	99	1.69	0.0907	0.281
Zfp516	ENSMUSG00000058881	120	1.69	0.0914	0.281
Ube2d3	ENSMUSG00000078578	123	1.69	0.0913	0.281
Maged1	ENSMUSG00000025151	113	1.68	0.092	0.281
Irf7	ENSMUSG00000025498	119	1.68	0.0924	0.282
Gtf2h3	ENSMUSG00000029387	122	1.68	0.0923	0.282
Adipor2	ENSMUSG00000030168	128	1.68	0.0928	0.282
Zfp787	ENSMUSG00000046792	121	1.68	0.0927	0.282
Morc3	ENSMUSG00000039456	129	1.68	0.093	0.283
Sumo1	ENSMUSG00000026021	117	1.68	0.0937	0.284
Slc9a6	ENSMUSG00000060681	140	1.68	0.0938	0.284
Dnmt3a	ENSMUSG00000020661	118	1.67	0.0946	0.285
Mnat1	ENSMUSG00000021103	127	1.67	0.0945	0.285
Aip	ENSMUSG00000024847	112	1.67	0.0945	0.285
Arf4	ENSMUSG00000021877	114	1.67	0.0958	0.287
Eri3	ENSMUSG00000033423	113	1.67	0.0958	0.287
Ppp1r16a	ENSMUSG00000033819	142	1.67	0.0952	0.287
Rhbdf2	ENSMUSG00000020806	92	1.66	0.0966	0.289
Tmem173	ENSMUSG00000024349	127	1.66	0.0967	0.289
Ift57	ENSMUSG00000032965	119	1.66	0.0978	0.291
Rhod	ENSMUSG00000041845	123	1.66	0.0977	0.291
Snd1	ENSMUSG00000001424	115	1.65	0.098	0.291
Arf1	ENSMUSG00000048076	112	1.65	0.098	0.291
Dgkz	ENSMUSG00000040479	130	1.65	0.0994	0.294
Prpf6	ENSMUSG00000002455	122	1.65	0.0997	0.295
Cnot7	ENSMUSG00000031601	112	1.65	0.0999	0.295
Mtfr1	ENSMUSG00000027601	113	1.64	0.1	0.295
Srsf2	ENSMUSG00000034120	117	1.64	0.1	0.295
Ubac1	ENSMUSG00000036352	113	1.64	0.1	0.295
Irf9	ENSMUSG00000002325	129	1.64	0.101	0.296
Gna11	ENSMUSG00000034781	111	1.64	0.101	0.296
Tcirg1	ENSMUSG00000001750	125	1.64	0.102	0.297
Prkaca	ENSMUSG00000005469	113	1.64	0.102	0.297
Cops5	ENSMUSG00000025917	112	1.64	0.102	0.297
Esf1	ENSMUSG00000045624	120	1.64	0.102	0.297
Irak2	ENSMUSG00000060477	126	1.64	0.101	0.297
Slc27a1	ENSMUSG00000031808	61	1.63	0.103	0.298
Bag4	ENSMUSG00000037316	133	1.63	0.103	0.299
Zfp318	ENSMUSG00000015597	81	1.63	0.104	0.3
Nras	ENSMUSG00000027852	114	1.63	0.104	0.3
Vhl	ENSMUSG00000033933	132	1.63	0.104	0.3
Sod2	ENSMUSG00000006818	113	1.62	0.104	0.301
Mms19	ENSMUSG00000025159	140	1.62	0.104	0.301
Ctnna1	ENSMUSG00000037815	111	1.62	0.105	0.302
Snap23	ENSMUSG00000027287	110	1.62	0.106	0.304
Stoml2	ENSMUSG00000028455	111	1.62	0.106	0.304
Dpp3	ENSMUSG00000063904	115	1.61	0.106	0.305
Tbl1x	ENSMUSG00000025246	118	1.61	0.107	0.306
Apex1	ENSMUSG00000035960	111	1.61	0.107	0.306
Rcc2	ENSMUSG00000040945	113	1.61	0.107	0.306
Mbtd1	ENSMUSG00000059474	114	1.61	0.107	0.306
Nacc1	ENSMUSG00000001910	125	1.61	0.108	0.307
Acox1	ENSMUSG00000020777	112	1.6	0.109	0.308
Nfkb2	ENSMUSG00000025225	111	1.6	0.109	0.308
Adrm1	ENSMUSG00000039041	109	1.6	0.109	0.308
Vamp7	ENSMUSG00000051412	109	1.6	0.109	0.308
Dzip3	ENSMUSG00000064061	136	1.6	0.109	0.308
Ing5	ENSMUSG00000026283	54	1.59	0.112	0.314
Terf1	ENSMUSG00000025925	134	1.59	0.113	0.317
Phf20	ENSMUSG00000038116	114	1.59	0.113	0.317
Gpc4	ENSMUSG00000031119	130	1.58	0.113	0.317
Scfd1	ENSMUSG00000020952	116	1.58	0.114	0.318
Epha4	ENSMUSG00000026235	69	1.58	0.113	0.318
Cdv3	ENSMUSG00000032803	113	1.58	0.114	0.318
Sppl2b	ENSMUSG00000035206	119	1.58	0.114	0.318
Nrf1	ENSMUSG00000058440	150	1.58	0.114	0.318
Sertad2	ENSMUSG00000049800	117	1.58	0.115	0.319
Prmt7	ENSMUSG00000060098	110	1.58	0.115	0.319
Bcl3	ENSMUSG00000053175	116	1.57	0.115	0.32
Aebp2	ENSMUSG00000030232	114	1.57	0.116	0.322
Prmt5	ENSMUSG00000023110	112	1.57	0.117	0.324
Capn1	ENSMUSG00000024942	120	1.57	0.117	0.324
Map2k3	ENSMUSG00000018932	111	1.56	0.118	0.324
Zfp422	ENSMUSG00000059878	124	1.56	0.118	0.324
Katna1	ENSMUSG00000019794	120	1.56	0.119	0.326
Pdcd10	ENSMUSG00000027835	108	1.56	0.119	0.326
Trappc4	ENSMUSG00000032112	123	1.56	0.119	0.326
Zfp512	ENSMUSG00000062761	148	1.56	0.12	0.327
Acad8	ENSMUSG00000031969	120	1.55	0.12	0.329
Snap29	ENSMUSG00000022765	135	1.55	0.121	0.331
Usp4	ENSMUSG00000032612	119	1.55	0.122	0.331
Pon2	ENSMUSG00000032667	109	1.55	0.122	0.331
Ifitm2	ENSMUSG00000060591	239	1.55	0.122	0.331
Dnaja3	ENSMUSG00000004069	116	1.54	0.122	0.331
Gatad1	ENSMUSG00000007415	109	1.54	0.122	0.331
Tsc22d2	ENSMUSG00000027806	112	1.54	0.123	0.331
Nelfa	ENSMUSG00000029111	112	1.54	0.123	0.331
Ssbp3	ENSMUSG00000061887	117	1.54	0.122	0.331
Ssbp4	ENSMUSG00000070003	114	1.54	0.122	0.331
Rab5b	ENSMUSG00000000711	129	1.54	0.124	0.332
Pdlim1	ENSMUSG00000055044	117	1.54	0.124	0.332
H2-Q4	ENSMUSG00000035929	73	1.54	0.124	0.333
Sympk	ENSMUSG00000023118	110	1.53	0.125	0.335
Gpr176	ENSMUSG00000040133	51	1.53	0.125	0.335
Pygl	ENSMUSG00000021069	116	1.53	0.127	0.338
Akirin2	ENSMUSG00000028291	113	1.53	0.127	0.338
Sgf29	ENSMUSG00000030714	127	1.53	0.127	0.338
Ap2a2	ENSMUSG00000002957	109	1.52	0.128	0.34
Stxbp1	ENSMUSG00000026797	161	1.52	0.128	0.34
Dnajb6	ENSMUSG00000029131	112	1.52	0.128	0.34
Tapbpl	ENSMUSG00000038213	139	1.52	0.128	0.34
Gja1	ENSMUSG00000050953	115	1.52	0.129	0.341
Polr3c	ENSMUSG00000028099	119	1.52	0.129	0.342
Tle3	ENSMUSG00000032280	135	1.51	0.13	0.343
Terf2ip	ENSMUSG00000033430	147	1.51	0.13	0.343
Litaf	ENSMUSG00000022500	116	1.51	0.131	0.344
Tfb2m	ENSMUSG00000026492	101	1.51	0.131	0.344
Zswim7	ENSMUSG00000014243	118	1.51	0.132	0.346
Efnb1	ENSMUSG00000031217	120	1.51	0.132	0.346
Irf2bp1	ENSMUSG00000044030	131	1.51	0.132	0.346
Zmat2	ENSMUSG00000001383	112	1.5	0.134	0.347
Psen1	ENSMUSG00000019969	116	1.5	0.133	0.347
Ppil2	ENSMUSG00000022771	113	1.5	0.134	0.347
Hbegf	ENSMUSG00000024486	121	1.5	0.133	0.347
Zfand5	ENSMUSG00000024750	113	1.5	0.134	0.347
Pex14	ENSMUSG00000028975	117	1.5	0.133	0.347
Rlf	ENSMUSG00000049878	137	1.5	0.133	0.347
Nfil3	ENSMUSG00000056749	111	1.5	0.134	0.347
Nr4a3	ENSMUSG00000028341	124	1.5	0.134	0.348
Cyth2	ENSMUSG00000003269	116	1.49	0.136	0.351
Ctnnb1	ENSMUSG00000006932	110	1.49	0.136	0.351
Rap2b	ENSMUSG00000036894	131	1.49	0.136	0.351
Smarcb1	ENSMUSG00000000902	111	1.49	0.137	0.352
P3h1	ENSMUSG00000028641	114	1.48	0.138	0.354
Tmed1	ENSMUSG00000032180	114	1.48	0.138	0.354
Pskh1	ENSMUSG00000048310	151	1.48	0.138	0.354
Supt4a	ENSMUSG00000020485	113	1.48	0.139	0.356
Ilf2	ENSMUSG00000001016	119	1.47	0.142	0.358
Pafah1b2	ENSMUSG00000003131	118	1.47	0.141	0.358
Rrn3	ENSMUSG00000022682	155	1.47	0.142	0.358
Enpp5	ENSMUSG00000023960	140	1.47	0.142	0.358
Atrx	ENSMUSG00000031229	110	1.47	0.141	0.358
Icam1	ENSMUSG00000037405	118	1.47	0.141	0.358
Rxrb	ENSMUSG00000039656	119	1.47	0.142	0.358
Hnrnpul1	ENSMUSG00000040725	112	1.47	0.141	0.358
Zbtb8os	ENSMUSG00000057572	114	1.47	0.141	0.358
Eloc	ENSMUSG00000079658	111	1.47	0.142	0.358
Snap47	ENSMUSG00000009894	112	1.47	0.143	0.359
Plscr3	ENSMUSG00000019461	108	1.47	0.143	0.359
Rnf34	ENSMUSG00000029474	124	1.47	0.142	0.359
Nubp1	ENSMUSG00000022503	116	1.46	0.143	0.359
Maf1	ENSMUSG00000022553	111	1.46	0.143	0.359
Ybx1	ENSMUSG00000028639	133	1.46	0.144	0.359
Ankrd27	ENSMUSG00000034867	123	1.46	0.143	0.359
Myo1c	ENSMUSG00000017774	110	1.46	0.145	0.361
Safb	ENSMUSG00000071054	110	1.46	0.145	0.361
Tcf25	ENSMUSG00000001472	118	1.46	0.145	0.362
Thoc1	ENSMUSG00000024287	117	1.45	0.147	0.366
Zfp410	ENSMUSG00000042472	146	1.45	0.147	0.366
Trim32	ENSMUSG00000051675	117	1.45	0.147	0.366
Traf4	ENSMUSG00000017386	124	1.45	0.148	0.367
Smad7	ENSMUSG00000025880	122	1.45	0.148	0.367
C1d	ENSMUSG00000000581	124	1.44	0.149	0.367
Hoxc8	ENSMUSG00000001657	148	1.44	0.149	0.367
Srpk1	ENSMUSG00000004865	112	1.44	0.15	0.367
Mta1	ENSMUSG00000021144	132	1.44	0.149	0.367
Acin1	ENSMUSG00000022185	113	1.44	0.149	0.367
Ptpn2	ENSMUSG00000024539	114	1.44	0.15	0.367
Csnk1d	ENSMUSG00000025162	116	1.44	0.151	0.367
Itgav	ENSMUSG00000027087	117	1.44	0.15	0.367
Ctbp1	ENSMUSG00000037373	111	1.44	0.149	0.367
Maff	ENSMUSG00000042622	115	1.44	0.151	0.367
Kmt5c	ENSMUSG00000059851	65	1.44	0.15	0.367
Sarnp	ENSMUSG00000078427	121	1.44	0.149	0.367
Wwox	ENSMUSG00000004637	109	1.43	0.152	0.367
Snx6	ENSMUSG00000005656	112	1.43	0.152	0.367
Mpp5	ENSMUSG00000021112	131	1.43	0.152	0.367
Tfeb	ENSMUSG00000023990	39	1.43	0.152	0.367
Ccnt2	ENSMUSG00000026349	138	1.43	0.152	0.367
Gpbp1	ENSMUSG00000032745	118	1.43	0.152	0.367
Ebag9	ENSMUSG00000022339	118	1.43	0.153	0.368
Epc1	ENSMUSG00000024240	144	1.43	0.153	0.368
Inppl1	ENSMUSG00000032737	117	1.43	0.153	0.368
Jak2	ENSMUSG00000024789	121	1.43	0.154	0.369
Nsfl1c	ENSMUSG00000027455	110	1.43	0.154	0.369
Zfp800	ENSMUSG00000039841	38	1.43	0.153	0.369
Pias2	ENSMUSG00000025423	115	1.42	0.155	0.37
Ppp3r1	ENSMUSG00000033953	109	1.42	0.154	0.37
Cbfb	ENSMUSG00000031885	113	1.42	0.155	0.371
Gabpa	ENSMUSG00000008976	119	1.42	0.157	0.373
Aldh3b1	ENSMUSG00000024885	155	1.42	0.156	0.373
Psmd9	ENSMUSG00000029440	116	1.42	0.157	0.373
Gopc	ENSMUSG00000019861	127	1.41	0.158	0.374
Farp1	ENSMUSG00000025555	130	1.41	0.157	0.374
Rab5a	ENSMUSG00000017831	113	1.41	0.16	0.376
Arf5	ENSMUSG00000020440	122	1.41	0.159	0.376
Zdhhc3	ENSMUSG00000025786	119	1.41	0.16	0.376
Smarcd3	ENSMUSG00000028949	121	1.41	0.16	0.376
Zfp330	ENSMUSG00000031711	115	1.41	0.16	0.376
Ing2	ENSMUSG00000063049	110	1.41	0.159	0.376
Zfp523	ENSMUSG00000024220	57	1.4	0.162	0.378
Zbtb33	ENSMUSG00000048047	33	1.4	0.161	0.378
Tbpl1	ENSMUSG00000071359	114	1.4	0.161	0.378
Grk6	ENSMUSG00000074886	119	1.4	0.161	0.378
Zkscan17	ENSMUSG00000020472	137	1.4	0.162	0.379
Atp6v0a2	ENSMUSG00000038023	115	1.4	0.162	0.379
Synpo	ENSMUSG00000043079	113	1.4	0.162	0.379
Tada1	ENSMUSG00000026563	115	1.4	0.163	0.38
Gpbp1l1	ENSMUSG00000034042	124	1.39	0.164	0.381
B4galt1	ENSMUSG00000028413	113	1.39	0.165	0.383
Gtf2e2	ENSMUSG00000031585	116	1.39	0.166	0.383
Dync1li1	ENSMUSG00000032435	114	1.39	0.165	0.383
Dmtf1	ENSMUSG00000042508	136	1.39	0.165	0.383
H2-T22	ENSMUSG00000056116	108	1.39	0.165	0.383
Churc1	ENSMUSG00000090258	109	1.39	0.165	0.383
Atn1	ENSMUSG00000004263	110	1.38	0.167	0.386
Zranb2	ENSMUSG00000028180	112	1.38	0.167	0.386
Zcchc10	ENSMUSG00000018239	115	1.38	0.169	0.388
H13	ENSMUSG00000019188	116	1.38	0.168	0.388
Ifnar2	ENSMUSG00000022971	114	1.38	0.169	0.388
Sox4	ENSMUSG00000076431	116	1.38	0.169	0.388
Mcts1	ENSMUSG00000000355	112	1.37	0.169	0.388
Adss	ENSMUSG00000015961	117	1.37	0.17	0.388
Apbb1	ENSMUSG00000037032	120	1.37	0.169	0.388
Stat3	ENSMUSG00000004040	112	1.37	0.171	0.39
Ubc	ENSMUSG00000008348	170	1.37	0.171	0.39
Zfpl1	ENSMUSG00000024792	113	1.37	0.171	0.39
Blzf1	ENSMUSG00000026577	123	1.37	0.171	0.39
Cptp	ENSMUSG00000029073	109	1.37	0.171	0.39
Zmynd8	ENSMUSG00000039671	114	1.37	0.172	0.391
Rnpep	ENSMUSG00000041926	119	1.37	0.172	0.391
Ciao1	ENSMUSG00000003662	116	1.36	0.174	0.394
Ctnnbip1	ENSMUSG00000028988	113	1.36	0.174	0.394
Max	ENSMUSG00000059436	115	1.36	0.174	0.394
Tsg101	ENSMUSG00000014402	111	1.36	0.175	0.395
Ell	ENSMUSG00000070002	135	1.36	0.175	0.395
Nod1	ENSMUSG00000038058	111	1.36	0.175	0.396
Orc6	ENSMUSG00000031697	118	1.35	0.176	0.397
Rab8a	ENSMUSG00000003037	112	1.35	0.177	0.398
Arhgap17	ENSMUSG00000030766	125	1.35	0.177	0.398
Ubap1	ENSMUSG00000028437	109	1.35	0.179	0.401
Carhsp1	ENSMUSG00000008393	120	1.34	0.179	0.401
Sgcb	ENSMUSG00000029156	122	1.34	0.179	0.401
Rap2c	ENSMUSG00000050029	121	1.34	0.179	0.401
Fads1	ENSMUSG00000010663	117	1.34	0.181	0.402
Wbp4	ENSMUSG00000022023	118	1.34	0.181	0.402
Tial1	ENSMUSG00000030846	111	1.34	0.18	0.402
Zbtb45	ENSMUSG00000049600	141	1.34	0.181	0.402
Trip6	ENSMUSG00000023348	112	1.33	0.183	0.406
Creb1	ENSMUSG00000025958	124	1.33	0.183	0.406
Capn2	ENSMUSG00000026509	111	1.33	0.183	0.406
Cdipt	ENSMUSG00000030682	114	1.33	0.183	0.406
Elp4	ENSMUSG00000027167	127	1.33	0.184	0.407
Stxbp3	ENSMUSG00000027882	110	1.33	0.185	0.407
Cap1	ENSMUSG00000028656	122	1.33	0.184	0.407
Gnai3	ENSMUSG00000000001	111	1.33	0.185	0.408
Znrd1	ENSMUSG00000036315	111	1.33	0.185	0.408
Akt2	ENSMUSG00000004056	114	1.32	0.185	0.408
Zdhhc20	ENSMUSG00000021969	109	1.32	0.186	0.409
Plrg1	ENSMUSG00000027998	117	1.32	0.187	0.409
Lamtor1	ENSMUSG00000030842	112	1.32	0.186	0.409
Vps72	ENSMUSG00000008958	110	1.32	0.187	0.41
Nfe2l2	ENSMUSG00000015839	114	1.32	0.188	0.41
Frk	ENSMUSG00000019779	121	1.32	0.188	0.41
Bmpr1a	ENSMUSG00000021796	111	1.32	0.188	0.41
Msl3	ENSMUSG00000031358	118	1.32	0.187	0.41
Mcmbp	ENSMUSG00000048170	129	1.32	0.188	0.41
Naa15	ENSMUSG00000063273	117	1.32	0.188	0.41
Mov10	ENSMUSG00000002227	122	1.31	0.189	0.412
Xbp1	ENSMUSG00000020484	120	1.31	0.19	0.412
Xrn2	ENSMUSG00000027433	112	1.31	0.19	0.412
Tsfm	ENSMUSG00000040521	115	1.31	0.19	0.412
Sipa1	ENSMUSG00000056917	110	1.31	0.191	0.414
Nelfcd	ENSMUSG00000016253	124	1.3	0.192	0.414
Psmc5	ENSMUSG00000020708	114	1.3	0.192	0.414
Arfgap2	ENSMUSG00000027255	120	1.3	0.192	0.414
BC004004	ENSMUSG00000052712	109	1.3	0.192	0.414
Rhoa	ENSMUSG00000007815	118	1.3	0.194	0.415
Pspc1	ENSMUSG00000021938	118	1.3	0.193	0.415
Neo1	ENSMUSG00000032340	116	1.3	0.194	0.415
Flot2	ENSMUSG00000061981	109	1.3	0.193	0.415
Steap4	ENSMUSG00000012428	120	1.29	0.196	0.419
Mapk1	ENSMUSG00000063358	109	1.29	0.196	0.419
Il2	ENSMUSG00000027720	152	1.29	0.197	0.42
Taf5l	ENSMUSG00000038697	121	1.29	0.197	0.42
Prdm5	ENSMUSG00000029913	142	1.29	0.198	0.422
Med21	ENSMUSG00000030291	113	1.28	0.199	0.423
Adgre5	ENSMUSG00000002885	136	1.28	0.2	0.424
Slmap	ENSMUSG00000021870	115	1.28	0.2	0.424
Ptk7	ENSMUSG00000023972	117	1.28	0.2	0.424
Wdtc1	ENSMUSG00000037622	127	1.28	0.201	0.424
Klf2	ENSMUSG00000055148	277	1.28	0.2	0.424
Cnot8	ENSMUSG00000020515	114	1.28	0.202	0.426
Pcgf5	ENSMUSG00000024805	125	1.28	0.202	0.426
E2f5	ENSMUSG00000027552	152	1.27	0.203	0.426
Zcchc8	ENSMUSG00000029427	128	1.27	0.203	0.426
Ruvbl1	ENSMUSG00000030079	109	1.27	0.203	0.426
Leo1	ENSMUSG00000042487	122	1.27	0.203	0.426
Nfic	ENSMUSG00000055053	113	1.27	0.203	0.426
Tmx1	ENSMUSG00000021072	111	1.27	0.204	0.427
Ankzf1	ENSMUSG00000026199	26	1.27	0.204	0.427
Zfp830	ENSMUSG00000046010	136	1.27	0.204	0.427
Gclc	ENSMUSG00000032350	33	1.27	0.205	0.428
Dxo	ENSMUSG00000040482	125	1.27	0.205	0.428
Phf5a	ENSMUSG00000061360	124	1.27	0.206	0.429
2019-09-07	ENSMUSG00000001833	114	1.26	0.206	0.43
Mcoln1	ENSMUSG00000004567	89	1.26	0.207	0.43
Ubp1	ENSMUSG00000009741	115	1.26	0.208	0.43
Rela	ENSMUSG00000024927	115	1.26	0.208	0.43
Zc3h15	ENSMUSG00000027091	120	1.26	0.208	0.43
Haus7	ENSMUSG00000031371	119	1.26	0.208	0.43
Chd6	ENSMUSG00000057133	139	1.26	0.207	0.43
Bcl9l	ENSMUSG00000063382	102	1.26	0.208	0.43
Zfyve21	ENSMUSG00000021286	111	1.26	0.209	0.432
Samhd1	ENSMUSG00000027639	117	1.25	0.211	0.434
Zc3hc1	ENSMUSG00000039130	121	1.25	0.211	0.434
Pyurf	ENSMUSG00000043162	113	1.25	0.212	0.436
Pak1ip1	ENSMUSG00000038683	112	1.25	0.213	0.437
Xrcc6	ENSMUSG00000022471	124	1.24	0.214	0.438
Rab13	ENSMUSG00000027935	110	1.24	0.214	0.438
Flcn	ENSMUSG00000032633	136	1.24	0.214	0.438
Traf7	ENSMUSG00000052752	117	1.24	0.214	0.438
Tnk2	ENSMUSG00000022791	58	1.24	0.216	0.44
Rfx7	ENSMUSG00000037674	68	1.24	0.215	0.44
Foxf1	ENSMUSG00000042812	47	1.24	0.215	0.44
Tceanc2	ENSMUSG00000028619	66	1.24	0.217	0.442
Nolc1	ENSMUSG00000015176	116	1.23	0.217	0.442
Elp5	ENSMUSG00000018565	117	1.23	0.218	0.442
Sub1	ENSMUSG00000022205	122	1.23	0.217	0.442
Zdhhc6	ENSMUSG00000024982	115	1.23	0.217	0.442
Clic4	ENSMUSG00000037242	113	1.23	0.217	0.442
Wdr77	ENSMUSG00000000561	116	1.23	0.219	0.443
Aplp2	ENSMUSG00000031996	117	1.23	0.218	0.443
Mypop	ENSMUSG00000048481	124	1.23	0.219	0.443
Rnf10	ENSMUSG00000041740	119	1.23	0.22	0.445
Slc27a4	ENSMUSG00000059316	119	1.22	0.221	0.446
Smarcd2	ENSMUSG00000078619	119	1.22	0.221	0.446
Med25	ENSMUSG00000002968	112	1.22	0.222	0.447
Cbx3	ENSMUSG00000029836	119	1.22	0.223	0.447
Cttn	ENSMUSG00000031078	112	1.22	0.222	0.447
Trabd2b	ENSMUSG00000070867	139	1.22	0.223	0.447
Creb3l1	ENSMUSG00000027230	110	1.22	0.224	0.448
Mta3	ENSMUSG00000055817	116	1.22	0.223	0.448
Nab1	ENSMUSG00000002881	119	1.21	0.224	0.449
Rab4a	ENSMUSG00000019478	113	1.21	0.225	0.449
Rtf1	ENSMUSG00000027304	116	1.21	0.224	0.449
Palld	ENSMUSG00000058056	116	1.21	0.226	0.451
Flot1	ENSMUSG00000059714	116	1.21	0.226	0.451
2610301B20Rik	ENSMUSG00000059482	142	1.21	0.227	0.452
Trappc2	ENSMUSG00000079317	120	1.21	0.228	0.453
Agpat3	ENSMUSG00000001211	118	1.2	0.231	0.455
Prkacb	ENSMUSG00000005034	117	1.2	0.23	0.455
Mef2c	ENSMUSG00000005583	70	1.2	0.23	0.455
Eps8	ENSMUSG00000015766	117	1.2	0.231	0.455
Zfp687	ENSMUSG00000019338	110	1.2	0.231	0.455
Dbnl	ENSMUSG00000020476	113	1.2	0.231	0.455
Ripk1	ENSMUSG00000021408	118	1.2	0.231	0.455
Cers5	ENSMUSG00000023021	114	1.2	0.229	0.455
Ptpra	ENSMUSG00000027303	109	1.2	0.229	0.455
Erc1	ENSMUSG00000030172	113	1.2	0.229	0.455
Zfp598	ENSMUSG00000041130	132	1.2	0.231	0.455
Hexim1	ENSMUSG00000048878	131	1.2	0.232	0.455
Yaf2	ENSMUSG00000022634	115	1.19	0.233	0.457
Tfip11	ENSMUSG00000029345	137	1.19	0.233	0.457
Ing1	ENSMUSG00000045969	120	1.19	0.233	0.457
Hif1a	ENSMUSG00000021109	116	1.19	0.234	0.458
Surf2	ENSMUSG00000014873	160	1.19	0.235	0.459
Got2	ENSMUSG00000031672	110	1.19	0.236	0.459
Suclg1	ENSMUSG00000052738	115	1.19	0.235	0.459
Grb2	ENSMUSG00000059923	110	1.19	0.236	0.459
Fryl	ENSMUSG00000070733	44	1.19	0.235	0.459
Zfp511	ENSMUSG00000025470	116	1.18	0.237	0.46
Copb1	ENSMUSG00000030754	109	1.18	0.237	0.46
Tead2	ENSMUSG00000030796	134	1.18	0.237	0.46
Msn	ENSMUSG00000031207	116	1.18	0.237	0.46
Aatf	ENSMUSG00000018697	114	1.18	0.238	0.461
Ube2v1	ENSMUSG00000078923	134	1.18	0.239	0.462
Wiz	ENSMUSG00000024050	48	1.18	0.24	0.463
Casp8	ENSMUSG00000026029	113	1.17	0.24	0.463
Slc4a1ap	ENSMUSG00000029141	148	1.17	0.24	0.463
Zmym3	ENSMUSG00000031310	54	1.17	0.24	0.463
Rbsn	ENSMUSG00000014550	138	1.17	0.242	0.464
Ash2l	ENSMUSG00000031575	118	1.17	0.241	0.464
Rbfox2	ENSMUSG00000033565	110	1.17	0.241	0.464
Zfp622	ENSMUSG00000052253	109	1.17	0.243	0.465
H2-D1	ENSMUSG00000073411	305	1.17	0.242	0.465
Arl13b	ENSMUSG00000022911	122	1.17	0.244	0.467
Efr3a	ENSMUSG00000015002	110	1.16	0.245	0.467
Dennd4c	ENSMUSG00000038024	59	1.16	0.245	0.468
Zfp110	ENSMUSG00000058638	136	1.16	0.246	0.469
Ppard	ENSMUSG00000002250	143	1.16	0.247	0.47
Cdc42ep5	ENSMUSG00000063838	113	1.16	0.247	0.47
Tbcd	ENSMUSG00000039230	130	1.16	0.248	0.471
Cnot6	ENSMUSG00000020362	115	1.15	0.25	0.474
Nr2f6	ENSMUSG00000002393	109	1.15	0.25	0.475
Puf60	ENSMUSG00000002524	116	1.15	0.251	0.475
Homer3	ENSMUSG00000003573	123	1.15	0.251	0.475
Hdac3	ENSMUSG00000024454	114	1.15	0.251	0.475
Slc7a6	ENSMUSG00000031904	116	1.15	0.251	0.475
Supt5	ENSMUSG00000003435	114	1.14	0.253	0.476
Tfam	ENSMUSG00000003923	119	1.14	0.252	0.476
Zc3h18	ENSMUSG00000017478	118	1.14	0.253	0.476
Mbd3	ENSMUSG00000035478	111	1.14	0.253	0.476
Gphn	ENSMUSG00000047454	55	1.14	0.252	0.476
Xpo6	ENSMUSG00000000131	137	1.14	0.255	0.478
Crk	ENSMUSG00000017776	108	1.14	0.256	0.478
Ptp4a2	ENSMUSG00000028788	114	1.14	0.255	0.478
Baz2a	ENSMUSG00000040054	139	1.14	0.254	0.478
Gtf2i	ENSMUSG00000060261	111	1.14	0.255	0.478
Paf1	ENSMUSG00000003437	117	1.13	0.257	0.48
Yeats4	ENSMUSG00000020171	115	1.13	0.257	0.48
Il10rb	ENSMUSG00000022969	112	1.13	0.257	0.48
Adipor1	ENSMUSG00000026457	114	1.13	0.258	0.48
Tsc22d4	ENSMUSG00000029723	112	1.13	0.256	0.48
Tnfrsf23	ENSMUSG00000037613	136	1.13	0.257	0.48
Ncs1	ENSMUSG00000062661	122	1.13	0.257	0.48
Trim33	ENSMUSG00000033014	112	1.13	0.258	0.481
Glmp	ENSMUSG00000001418	109	1.13	0.259	0.482
Pacsin2	ENSMUSG00000016664	117	1.13	0.26	0.482
Stim2	ENSMUSG00000039156	111	1.12	0.262	0.485
Cbfa2t2	ENSMUSG00000038533	124	1.12	0.263	0.486
Plaur	ENSMUSG00000046223	113	1.12	0.263	0.486
Chd4	ENSMUSG00000063870	111	1.12	0.263	0.486
Hoxc6	ENSMUSG00000001661	149	1.12	0.264	0.487
Pias4	ENSMUSG00000004934	121	1.12	0.264	0.487
Slc3a2	ENSMUSG00000010095	112	1.12	0.265	0.487
Tspan9	ENSMUSG00000030352	115	1.12	0.264	0.487
Sirt6	ENSMUSG00000034748	59	1.12	0.264	0.487
Sap18	ENSMUSG00000021963	111	1.11	0.265	0.488
Rfxap	ENSMUSG00000036615	117	1.11	0.266	0.488
Snapc2	ENSMUSG00000011837	126	1.11	0.267	0.489
P4hb	ENSMUSG00000025130	113	1.11	0.266	0.489
Uba3	ENSMUSG00000030061	121	1.11	0.267	0.489
Lmbrd1	ENSMUSG00000073725	109	1.11	0.266	0.489
Dnlz	ENSMUSG00000075467	120	1.11	0.267	0.489
Mta2	ENSMUSG00000071646	115	1.11	0.268	0.49
Smap1	ENSMUSG00000026155	114	1.11	0.269	0.491
Hnrnpd	ENSMUSG00000000568	116	1.1	0.27	0.492
Pbx2	ENSMUSG00000034673	133	1.1	0.269	0.492
Exoc7	ENSMUSG00000020792	118	1.1	0.271	0.493
Fasn	ENSMUSG00000025153	121	1.1	0.271	0.493
Cd99l2	ENSMUSG00000035776	125	1.1	0.271	0.493
Ciz1	ENSMUSG00000039205	121	1.09	0.275	0.497
Smo	ENSMUSG00000001761	118	1.09	0.275	0.498
Mst1r	ENSMUSG00000032584	38	1.09	0.276	0.498
Scyl1	ENSMUSG00000024941	114	1.09	0.277	0.5
Cd63	ENSMUSG00000025351	144	1.09	0.277	0.5
Rab4b	ENSMUSG00000053291	128	1.09	0.277	0.5
Gnai1	ENSMUSG00000057614	37	1.09	0.277	0.5
Rab9	ENSMUSG00000079316	116	1.09	0.278	0.5
Slc19a1	ENSMUSG00000001436	125	1.08	0.28	0.501
Chmp2b	ENSMUSG00000004843	111	1.08	0.282	0.501
Nme2	ENSMUSG00000020857	113	1.08	0.282	0.501
Med27	ENSMUSG00000026799	121	1.08	0.28	0.501
Eps15	ENSMUSG00000028552	124	1.08	0.282	0.501
Rnf6	ENSMUSG00000029634	110	1.08	0.281	0.501
Parva	ENSMUSG00000030770	113	1.08	0.281	0.501
Morf4l2	ENSMUSG00000031422	116	1.08	0.281	0.501
Rrad	ENSMUSG00000031880	134	1.08	0.279	0.501
1810055G02Rik	ENSMUSG00000035372	113	1.08	0.28	0.501
Rcbtb1	ENSMUSG00000035469	148	1.08	0.281	0.501
Rbm15	ENSMUSG00000048109	140	1.08	0.28	0.501
Kmt5a	ENSMUSG00000049327	113	1.08	0.282	0.501
Pcbd1	ENSMUSG00000020098	65	1.07	0.283	0.501
Rhog	ENSMUSG00000073982	121	1.07	0.283	0.501
Hmox2	ENSMUSG00000004070	114	1.07	0.284	0.502
E2f4	ENSMUSG00000014859	116	1.07	0.284	0.502
Znhit3	ENSMUSG00000020526	136	1.07	0.285	0.502
Pde4d	ENSMUSG00000021699	86	1.07	0.284	0.502
Phf1	ENSMUSG00000024193	133	1.07	0.284	0.502
Ercc3	ENSMUSG00000024382	135	1.07	0.285	0.502
Rif1	ENSMUSG00000036202	65	1.07	0.284	0.502
Zfp513	ENSMUSG00000043059	116	1.07	0.285	0.502
Trp53bp1	ENSMUSG00000043909	86	1.07	0.283	0.502
Nckap1	ENSMUSG00000027002	108	1.07	0.286	0.503
Coprs	ENSMUSG00000031458	100	1.06	0.287	0.505
Tdp2	ENSMUSG00000035958	113	1.06	0.288	0.506
Zfp664	ENSMUSG00000079215	124	1.06	0.29	0.508
Mllt10	ENSMUSG00000026743	119	1.05	0.293	0.513
Ccnl2	ENSMUSG00000029068	112	1.05	0.294	0.513
Slc30a9	ENSMUSG00000029221	120	1.05	0.294	0.513
Fubp1	ENSMUSG00000028034	112	1.05	0.295	0.514
Sirt2	ENSMUSG00000015149	113	1.04	0.297	0.516
Vmp1	ENSMUSG00000018171	113	1.04	0.299	0.516
Zfyve27	ENSMUSG00000018820	135	1.04	0.299	0.516
Arl6	ENSMUSG00000022722	116	1.04	0.3	0.516
Tbl1xr1	ENSMUSG00000027630	123	1.04	0.296	0.516
Zdhhc7	ENSMUSG00000031823	120	1.04	0.298	0.516
Smarcc1	ENSMUSG00000032481	112	1.04	0.298	0.516
Kdm1a	ENSMUSG00000036940	118	1.04	0.3	0.516
Stub1	ENSMUSG00000039615	124	1.04	0.297	0.516
Zfp444	ENSMUSG00000044876	141	1.04	0.297	0.516
Zbtb22	ENSMUSG00000051390	143	1.04	0.298	0.516
Rap1a	ENSMUSG00000068798	113	1.04	0.297	0.516
Adgrl1	ENSMUSG00000013033	130	1.04	0.301	0.517
Brd7	ENSMUSG00000031660	113	1.04	0.3	0.517
Map1b	ENSMUSG00000052727	110	1.04	0.3	0.517
Relb	ENSMUSG00000002983	113	1.03	0.301	0.517
Zfp503	ENSMUSG00000039081	110	1.03	0.301	0.517
Ppp2ca	ENSMUSG00000020349	114	1.03	0.303	0.518
Srebf1	ENSMUSG00000020538	114	1.03	0.303	0.518
Stom	ENSMUSG00000026880	61	1.03	0.303	0.518
Srp72	ENSMUSG00000036323	118	1.03	0.303	0.518
Ccdc8	ENSMUSG00000041117	128	1.03	0.303	0.518
Tardbp	ENSMUSG00000041459	121	1.03	0.303	0.518
Zfp281	ENSMUSG00000041483	113	1.03	0.302	0.518
Coro1c	ENSMUSG00000004530	116	1.02	0.307	0.523
Ehd1	ENSMUSG00000024772	118	1.02	0.308	0.523
Clns1a	ENSMUSG00000025439	112	1.02	0.306	0.523
Vps36	ENSMUSG00000031479	114	1.02	0.308	0.523
Taf2	ENSMUSG00000037343	93	1.02	0.308	0.523
Ubn1	ENSMUSG00000039473	119	1.02	0.308	0.523
Zfp131	ENSMUSG00000094870	124	1.02	0.308	0.523
Trim27	ENSMUSG00000021326	111	1.02	0.309	0.524
Taf9b	ENSMUSG00000047242	91	1.02	0.31	0.525
Dnajc5	ENSMUSG00000000826	111	1	0.315	0.533
Hat1	ENSMUSG00000027018	115	1	0.316	0.533
Myd88	ENSMUSG00000032508	110	1	0.316	0.533
Zscan21	ENSMUSG00000037017	138	1	0.316	0.533
Atp11b	ENSMUSG00000037400	124	1	0.315	0.533
Pqbp1	ENSMUSG00000031157	113	1	0.318	0.536
Gdpd2	ENSMUSG00000019359	56	1	0.319	0.537
Ifnar1	ENSMUSG00000022967	112	0.99	0.32	0.538
Pdpn	ENSMUSG00000028583	110	0.99	0.32	0.538
Taf6	ENSMUSG00000036980	114	0.99	0.32	0.538
Mdm2	ENSMUSG00000020184	120	0.99	0.322	0.539
Hmg20b	ENSMUSG00000020232	114	0.99	0.322	0.539
Ttc8	ENSMUSG00000021013	152	0.99	0.323	0.539
Ccnk	ENSMUSG00000021258	66	0.99	0.324	0.539
Zkscan3	ENSMUSG00000021327	121	0.99	0.323	0.539
Mark2	ENSMUSG00000024969	116	0.99	0.323	0.539
Erlin2	ENSMUSG00000031483	134	0.99	0.322	0.539
Hand2	ENSMUSG00000038193	118	0.99	0.324	0.539
Stau1	ENSMUSG00000039536	112	0.99	0.322	0.539
Dlgap4	ENSMUSG00000061689	110	0.99	0.323	0.539
Rap2a	ENSMUSG00000051615	115	0.99	0.325	0.54
Trpm7	ENSMUSG00000027365	114	0.98	0.326	0.542
Htatip2	ENSMUSG00000039745	112	0.98	0.328	0.543
Ccar1	ENSMUSG00000020074	113	0.98	0.329	0.544
Usp22	ENSMUSG00000042506	113	0.98	0.328	0.544
Zfp524	ENSMUSG00000051184	150	0.98	0.329	0.544
Golph3	ENSMUSG00000022200	110	0.97	0.33	0.546
Nfkb1	ENSMUSG00000028163	115	0.97	0.331	0.547
Mier3	ENSMUSG00000032727	67	0.97	0.332	0.547
Nat14	ENSMUSG00000035285	124	0.97	0.332	0.547
Zbed3	ENSMUSG00000041995	119	0.97	0.332	0.547
Zfp322a	ENSMUSG00000046351	137	0.97	0.333	0.548
Jmjd6	ENSMUSG00000056962	120	0.97	0.334	0.55
Arsa	ENSMUSG00000022620	118	0.96	0.335	0.551
Keap1	ENSMUSG00000003308	113	0.96	0.338	0.554
Lbh	ENSMUSG00000024063	111	0.96	0.339	0.555
Vps37b	ENSMUSG00000066278	107	0.95	0.34	0.557
Cnot3	ENSMUSG00000035632	112	0.95	0.342	0.559
Tm7sf3	ENSMUSG00000040234	111	0.95	0.341	0.559
Zfp358	ENSMUSG00000047264	114	0.95	0.343	0.56
Phf10	ENSMUSG00000023883	118	0.95	0.344	0.561
Rab14	ENSMUSG00000026878	111	0.95	0.343	0.561
Pnn	ENSMUSG00000020994	111	0.94	0.345	0.562
Nfkbia	ENSMUSG00000021025	361	0.94	0.345	0.562
Mynn	ENSMUSG00000037730	141	0.94	0.345	0.562
Maz	ENSMUSG00000030678	115	0.94	0.346	0.563
Sltm	ENSMUSG00000032212	116	0.94	0.346	0.563
Pias1	ENSMUSG00000032405	116	0.94	0.346	0.563
Purb	ENSMUSG00000094483	113	0.94	0.347	0.563
Map2k1	ENSMUSG00000004936	113	0.94	0.349	0.565
Uri1	ENSMUSG00000030421	122	0.94	0.349	0.565
Zrsr2	ENSMUSG00000031370	114	0.94	0.349	0.565
Mtf1	ENSMUSG00000028890	112	0.94	0.35	0.566
Ubqln1	ENSMUSG00000005312	109	0.93	0.35	0.566
Ccdc59	ENSMUSG00000019897	113	0.93	0.35	0.566
Zcchc14	ENSMUSG00000061410	122	0.93	0.35	0.566
Zfpm2	ENSMUSG00000022306	141	0.93	0.354	0.569
Rhoj	ENSMUSG00000046768	111	0.93	0.354	0.569
Mafg	ENSMUSG00000051510	110	0.93	0.353	0.569
Supt16	ENSMUSG00000035726	127	0.93	0.355	0.57
Tgfb3	ENSMUSG00000021253	115	0.92	0.357	0.573
Creb3	ENSMUSG00000028466	126	0.92	0.358	0.574
Zdhhc16	ENSMUSG00000025157	111	0.92	0.359	0.576
Calcoco1	ENSMUSG00000023055	139	0.91	0.361	0.578
Rgs19	ENSMUSG00000002458	113	0.91	0.362	0.579
Chd1	ENSMUSG00000023852	114	0.91	0.363	0.579
Necap2	ENSMUSG00000028923	114	0.91	0.362	0.579
Gnai2	ENSMUSG00000032562	119	0.91	0.362	0.579
Myo6	ENSMUSG00000033577	130	0.91	0.363	0.579
Sin3a	ENSMUSG00000042557	117	0.91	0.363	0.579
Zfp825	ENSMUSG00000069208	142	0.91	0.362	0.579
Tada2a	ENSMUSG00000018651	131	0.9	0.366	0.582
Nlgn2	ENSMUSG00000051790	124	0.9	0.368	0.586
Sf1	ENSMUSG00000024949	112	0.89	0.371	0.589
Stambp	ENSMUSG00000006906	142	0.89	0.373	0.59
Ccdc124	ENSMUSG00000007721	111	0.89	0.372	0.59
Thap7	ENSMUSG00000022760	120	0.89	0.372	0.59
Rchy1	ENSMUSG00000029397	110	0.89	0.373	0.59
Topors	ENSMUSG00000036822	112	0.89	0.373	0.59
Nacc2	ENSMUSG00000026932	134	0.89	0.374	0.591
Slc7a1	ENSMUSG00000041313	60	0.89	0.374	0.591
Mysm1	ENSMUSG00000062627	124	0.89	0.375	0.592
Fes	ENSMUSG00000053158	130	0.89	0.376	0.593
Dnttip2	ENSMUSG00000039756	114	0.88	0.377	0.593
Gng12	ENSMUSG00000036402	115	0.88	0.38	0.596
Pdia3	ENSMUSG00000027248	157	0.88	0.381	0.597
Atp6v1b2	ENSMUSG00000006273	114	0.87	0.382	0.598
Arid4a	ENSMUSG00000048118	119	0.87	0.382	0.598
Ano6	ENSMUSG00000064210	111	0.87	0.382	0.598
Brms1l	ENSMUSG00000012076	138	0.87	0.383	0.599
Dcaf6	ENSMUSG00000026571	54	0.87	0.383	0.599
Lin7c	ENSMUSG00000027162	112	0.87	0.385	0.599
Cdk11b	ENSMUSG00000029062	114	0.87	0.385	0.599
Tgfb1i1	ENSMUSG00000030782	115	0.87	0.385	0.599
Tceal1	ENSMUSG00000049536	123	0.87	0.384	0.599
Arf6	ENSMUSG00000044147	111	0.87	0.387	0.601
Adam17	ENSMUSG00000052593	119	0.87	0.387	0.601
Eif2b1	ENSMUSG00000029388	113	0.86	0.388	0.601
Rara	ENSMUSG00000037992	115	0.86	0.388	0.601
Ncam1	ENSMUSG00000039542	150	0.86	0.387	0.601
Tbc1d10b	ENSMUSG00000042492	148	0.86	0.387	0.601
Hmgcs1	ENSMUSG00000093930	122	0.86	0.388	0.601
Ywhab	ENSMUSG00000018326	119	0.86	0.389	0.602
Twist1	ENSMUSG00000035799	122	0.86	0.389	0.602
Nelfe	ENSMUSG00000024369	120	0.86	0.391	0.603
Map3k7	ENSMUSG00000028284	138	0.86	0.39	0.603
Mier2	ENSMUSG00000042570	67	0.86	0.391	0.603
Ccnc	ENSMUSG00000028252	126	0.85	0.393	0.605
Mgrn1	ENSMUSG00000022517	113	0.85	0.394	0.606
Kdm3a	ENSMUSG00000053470	126	0.85	0.393	0.606
Kat5	ENSMUSG00000024926	124	0.85	0.394	0.607
Magt1	ENSMUSG00000031232	109	0.85	0.396	0.607
Pxk	ENSMUSG00000033885	120	0.85	0.395	0.607
Sigmar1	ENSMUSG00000036078	114	0.85	0.395	0.607
Elf2	ENSMUSG00000037174	116	0.85	0.395	0.607
Tonsl	ENSMUSG00000059323	111	0.85	0.396	0.607
Atp2c1	ENSMUSG00000032570	113	0.84	0.399	0.61
Dbn1	ENSMUSG00000034675	116	0.84	0.399	0.61
Pkig	ENSMUSG00000035268	113	0.84	0.399	0.61
Crtc2	ENSMUSG00000027936	41	0.84	0.4	0.611
Hoxb7	ENSMUSG00000038721	118	0.84	0.4	0.611
Kdm5b	ENSMUSG00000042207	115	0.84	0.4	0.611
Fam129b	ENSMUSG00000026796	113	0.84	0.402	0.612
Smpd1	ENSMUSG00000037049	112	0.84	0.401	0.612
Brwd1	ENSMUSG00000022914	112	0.84	0.403	0.614
Cers2	ENSMUSG00000015714	114	0.83	0.408	0.616
1810043G02Rik	ENSMUSG00000020284	134	0.83	0.406	0.616
Yy1	ENSMUSG00000021264	111	0.83	0.408	0.616
Ifngr2	ENSMUSG00000022965	113	0.83	0.407	0.616
Sp3	ENSMUSG00000027109	111	0.83	0.408	0.616
Rbck1	ENSMUSG00000027466	117	0.83	0.407	0.616
Ppie	ENSMUSG00000028651	113	0.83	0.408	0.616
Aktip	ENSMUSG00000031667	119	0.83	0.405	0.616
Nsf	ENSMUSG00000034187	125	0.83	0.408	0.616
Zfp644	ENSMUSG00000049606	115	0.83	0.407	0.616
Slc31a1	ENSMUSG00000066150	112	0.83	0.406	0.616
Ncor1	ENSMUSG00000018501	122	0.83	0.409	0.617
Ppp4c	ENSMUSG00000030697	116	0.83	0.409	0.617
Gmcl1	ENSMUSG00000001157	119	0.82	0.41	0.617
Map3k12	ENSMUSG00000023050	55	0.82	0.411	0.617
Add1	ENSMUSG00000029106	110	0.82	0.41	0.617
Tnfrsf1a	ENSMUSG00000030341	118	0.82	0.409	0.617
Bbs5	ENSMUSG00000063145	105	0.82	0.411	0.617
Kdm5a	ENSMUSG00000030180	112	0.82	0.412	0.618
Kat2a	ENSMUSG00000020918	115	0.82	0.413	0.619
Sik1	ENSMUSG00000024042	37	0.82	0.413	0.619
Tln1	ENSMUSG00000028465	121	0.82	0.414	0.62
Ephb4	ENSMUSG00000029710	160	0.82	0.415	0.62
Zcchc9	ENSMUSG00000021621	117	0.81	0.415	0.62
Kat6a	ENSMUSG00000031540	75	0.81	0.415	0.62
Ptk2	ENSMUSG00000022607	144	0.81	0.416	0.621
Cxxc1	ENSMUSG00000024560	112	0.81	0.417	0.621
Suds3	ENSMUSG00000066900	110	0.81	0.416	0.621
Mafk	ENSMUSG00000018143	131	0.81	0.419	0.623
Nmt2	ENSMUSG00000026643	111	0.81	0.42	0.625
Cul5	ENSMUSG00000032030	119	0.81	0.42	0.625
Cdk7	ENSMUSG00000069089	112	0.81	0.42	0.625
Habp4	ENSMUSG00000021476	124	0.8	0.423	0.626
Pip5k1a	ENSMUSG00000028126	113	0.8	0.422	0.626
Mtf2	ENSMUSG00000029267	143	0.8	0.423	0.626
Ano10	ENSMUSG00000037949	119	0.8	0.423	0.626
Gabpb2	ENSMUSG00000038766	51	0.8	0.422	0.626
Rgmb	ENSMUSG00000048027	120	0.8	0.422	0.626
Rnf4	ENSMUSG00000029110	111	0.8	0.425	0.628
Nfatc3	ENSMUSG00000031902	46	0.8	0.425	0.628
Slc9a3r2	ENSMUSG00000002504	122	0.79	0.427	0.63
Nmt1	ENSMUSG00000020936	112	0.79	0.427	0.63
Hsf1	ENSMUSG00000022556	118	0.79	0.427	0.63
Glrx2	ENSMUSG00000018196	118	0.79	0.429	0.631
Mecp2	ENSMUSG00000031393	137	0.79	0.429	0.631
Nck1	ENSMUSG00000032475	113	0.79	0.428	0.631
Zfyve19	ENSMUSG00000068580	136	0.79	0.429	0.631
Atad1	ENSMUSG00000013662	113	0.79	0.431	0.632
Foxp4	ENSMUSG00000023991	119	0.79	0.431	0.632
Tcerg1	ENSMUSG00000024498	113	0.79	0.431	0.632
Dnajc1	ENSMUSG00000026740	116	0.79	0.431	0.632
Bhlhe40	ENSMUSG00000030103	111	0.79	0.43	0.632
Klf16	ENSMUSG00000035397	130	0.78	0.433	0.633
Btg1	ENSMUSG00000036478	112	0.78	0.432	0.633
Pnrc1	ENSMUSG00000040128	123	0.78	0.433	0.633
Pttg1	ENSMUSG00000020415	113	0.78	0.434	0.634
Raf1	ENSMUSG00000000441	110	0.78	0.435	0.636
Exoc1	ENSMUSG00000036435	134	0.78	0.435	0.636
Cldn12	ENSMUSG00000046798	38	0.78	0.436	0.636
Agtrap	ENSMUSG00000029007	117	0.78	0.438	0.637
Ndrg1	ENSMUSG00000005125	133	0.77	0.44	0.638
Zmynd11	ENSMUSG00000021156	113	0.77	0.439	0.638
Il17rc	ENSMUSG00000030281	115	0.77	0.439	0.638
Hes6	ENSMUSG00000067071	114	0.77	0.44	0.638
Med1	ENSMUSG00000018160	117	0.77	0.442	0.64
Esyt2	ENSMUSG00000021171	113	0.77	0.442	0.64
Atf2	ENSMUSG00000027104	122	0.77	0.441	0.64
Lmo4	ENSMUSG00000028266	111	0.77	0.442	0.64
Akt1	ENSMUSG00000001729	112	0.76	0.445	0.642
Gtf2e1	ENSMUSG00000022828	37	0.76	0.444	0.642
Men1	ENSMUSG00000024947	114	0.76	0.446	0.642
Cat	ENSMUSG00000027187	117	0.76	0.445	0.642
Per1	ENSMUSG00000020893	140	0.76	0.447	0.643
Tfe3	ENSMUSG00000000134	115	0.76	0.448	0.644
Dlst	ENSMUSG00000004789	117	0.76	0.449	0.645
Thap11	ENSMUSG00000036442	116	0.76	0.45	0.646
Rere	ENSMUSG00000039852	123	0.76	0.45	0.646
Ralb	ENSMUSG00000004451	117	0.75	0.452	0.647
Pttg1ip	ENSMUSG00000009291	112	0.75	0.452	0.647
Atp6v1a	ENSMUSG00000052459	117	0.75	0.453	0.648
Eps15l1	ENSMUSG00000006276	92	0.75	0.455	0.65
Atxn10	ENSMUSG00000016541	114	0.75	0.455	0.65
Sgk1	ENSMUSG00000019970	119	0.75	0.455	0.65
Nif3l1	ENSMUSG00000026036	125	0.75	0.454	0.65
Lrrfip1	ENSMUSG00000026305	114	0.75	0.456	0.65
Zc3h14	ENSMUSG00000021012	111	0.74	0.457	0.651
Brd8	ENSMUSG00000003778	124	0.73	0.462	0.659
Sfswap	ENSMUSG00000029439	149	0.73	0.463	0.659
Homer1	ENSMUSG00000007617	133	0.73	0.464	0.66
Cbx5	ENSMUSG00000009575	109	0.73	0.465	0.66
Cebpz	ENSMUSG00000024081	117	0.73	0.464	0.66
Taf10	ENSMUSG00000043866	111	0.73	0.465	0.66
Yipf3	ENSMUSG00000071074	115	0.73	0.466	0.662
Ddx50	ENSMUSG00000020076	110	0.72	0.47	0.664
Slc39a3	ENSMUSG00000046822	135	0.72	0.469	0.664
Commd7	ENSMUSG00000056941	109	0.72	0.47	0.664
Irak4	ENSMUSG00000059883	155	0.72	0.469	0.664
Zbtb11	ENSMUSG00000022601	105	0.72	0.471	0.665
Snapc1	ENSMUSG00000021113	135	0.72	0.472	0.666
Trip4	ENSMUSG00000032386	117	0.72	0.472	0.666
Supt6	ENSMUSG00000002052	115	0.71	0.478	0.669
Ccny	ENSMUSG00000024286	120	0.71	0.477	0.669
Aspscr1	ENSMUSG00000025142	109	0.71	0.477	0.669
Arhgap1	ENSMUSG00000027247	116	0.71	0.477	0.669
Anxa5	ENSMUSG00000027712	121	0.71	0.477	0.669
Adgra3	ENSMUSG00000029090	127	0.71	0.478	0.669
Eef1a1	ENSMUSG00000037742	213	0.71	0.475	0.669
Cdc42se1	ENSMUSG00000046722	114	0.71	0.479	0.669
Zfp219	ENSMUSG00000049295	104	0.71	0.476	0.669
Rp2	ENSMUSG00000060090	129	0.71	0.475	0.669
Zfp292	ENSMUSG00000039967	118	0.71	0.479	0.67
Hdac2	ENSMUSG00000019777	111	0.7	0.481	0.671
Taf12	ENSMUSG00000028899	113	0.7	0.484	0.674
Strap	ENSMUSG00000030224	111	0.7	0.484	0.674
Siva1	ENSMUSG00000064326	112	0.7	0.484	0.674
Mmp19	ENSMUSG00000025355	111	0.7	0.486	0.676
Ssbp2	ENSMUSG00000003992	115	0.69	0.489	0.678
Atp6v1c1	ENSMUSG00000022295	122	0.69	0.489	0.678
Rnf2	ENSMUSG00000026484	114	0.69	0.488	0.678
Rilpl1	ENSMUSG00000029392	113	0.69	0.489	0.678
Setd2	ENSMUSG00000044791	122	0.69	0.488	0.678
Rnf14	ENSMUSG00000060450	116	0.69	0.489	0.678
Snf8	ENSMUSG00000006058	117	0.69	0.491	0.679
Slc52a2	ENSMUSG00000022560	122	0.69	0.493	0.68
Tbxa2r	ENSMUSG00000034881	53	0.69	0.492	0.68
Tmem97	ENSMUSG00000037278	114	0.69	0.491	0.68
Rlim	ENSMUSG00000056537	124	0.69	0.493	0.681
Actl6a	ENSMUSG00000027671	114	0.68	0.498	0.685
Meaf6	ENSMUSG00000028863	110	0.68	0.496	0.685
Csk	ENSMUSG00000032312	113	0.68	0.497	0.685
Gtf2h5	ENSMUSG00000034345	113	0.68	0.497	0.685
Phf12	ENSMUSG00000037791	138	0.68	0.498	0.685
Adam12	ENSMUSG00000054555	123	0.68	0.498	0.685
Dbp	ENSMUSG00000059824	32	0.68	0.499	0.685
Slc44a1	ENSMUSG00000028412	110	0.67	0.5	0.686
Zbtb1	ENSMUSG00000033454	116	0.67	0.5	0.686
Sephs1	ENSMUSG00000026662	126	0.67	0.501	0.687
Snapc3	ENSMUSG00000028483	123	0.67	0.501	0.687
Zdhhc4	ENSMUSG00000001844	114	0.67	0.504	0.688
Mlx	ENSMUSG00000017801	120	0.67	0.503	0.688
Etnk1	ENSMUSG00000030275	118	0.67	0.504	0.688
Atp1b3	ENSMUSG00000032412	111	0.67	0.503	0.688
Ctnnd1	ENSMUSG00000034101	119	0.67	0.505	0.688
Epn1	ENSMUSG00000035203	110	0.67	0.504	0.688
Vezf1	ENSMUSG00000018377	118	0.66	0.508	0.688
Zcrb1	ENSMUSG00000022635	116	0.66	0.508	0.688
Rest	ENSMUSG00000029249	111	0.66	0.507	0.688
Irak1bp1	ENSMUSG00000032251	121	0.66	0.506	0.688
Smad3	ENSMUSG00000032402	163	0.66	0.509	0.688
Pbrm1	ENSMUSG00000042323	117	0.66	0.507	0.688
Fiz1	ENSMUSG00000061374	129	0.66	0.506	0.688
Nipa2	ENSMUSG00000030452	121	0.66	0.51	0.689
Hic1	ENSMUSG00000043099	128	0.66	0.511	0.691
Cdk12	ENSMUSG00000003119	117	0.65	0.515	0.694
Etv4	ENSMUSG00000017724	141	0.65	0.516	0.694
Il1r1	ENSMUSG00000026072	115	0.65	0.515	0.694
H2-T23	ENSMUSG00000067212	115	0.65	0.515	0.694
Jade1	ENSMUSG00000025764	123	0.65	0.517	0.695
Elf4	ENSMUSG00000031103	137	0.65	0.516	0.695
Zfp768	ENSMUSG00000047371	134	0.65	0.517	0.695
Atf6b	ENSMUSG00000015461	115	0.65	0.518	0.696
Ppp6r3	ENSMUSG00000024908	131	0.64	0.521	0.698
Chd8	ENSMUSG00000053754	134	0.64	0.52	0.698
Arhgef1	ENSMUSG00000040940	108	0.64	0.523	0.699
Zfp672	ENSMUSG00000049755	120	0.64	0.523	0.699
Nsmce3	ENSMUSG00000070520	114	0.64	0.525	0.701
Zfr	ENSMUSG00000022201	116	0.63	0.526	0.702
Prmt6	ENSMUSG00000049300	36	0.63	0.526	0.702
Nelfb	ENSMUSG00000013465	120	0.63	0.529	0.705
Slco2a1	ENSMUSG00000032548	68	0.63	0.529	0.705
Ankrd13a	ENSMUSG00000041870	123	0.63	0.53	0.706
Morf4l1	ENSMUSG00000062270	125	0.63	0.53	0.706
Yipf4	ENSMUSG00000024072	115	0.63	0.532	0.707
Dpf2	ENSMUSG00000024826	119	0.62	0.533	0.707
Capn10	ENSMUSG00000026270	119	0.62	0.532	0.707
Ptpn1	ENSMUSG00000027540	118	0.62	0.532	0.707
Ptges2	ENSMUSG00000026820	115	0.62	0.536	0.709
Plscr4	ENSMUSG00000032377	125	0.62	0.535	0.709
Med16	ENSMUSG00000013833	128	0.62	0.536	0.71
Usp8	ENSMUSG00000027363	124	0.62	0.537	0.71
Cenpb	ENSMUSG00000068267	114	0.62	0.537	0.71
Rnf20	ENSMUSG00000028309	117	0.61	0.541	0.713
Map4	ENSMUSG00000032479	113	0.61	0.541	0.713
Stat6	ENSMUSG00000002147	113	0.61	0.542	0.714
Slc46a1	ENSMUSG00000020829	26	0.61	0.544	0.717
Slirp	ENSMUSG00000021040	110	0.61	0.545	0.717
Spred2	ENSMUSG00000045671	148	0.61	0.545	0.717
Rala	ENSMUSG00000008859	112	0.6	0.547	0.718
Ring1	ENSMUSG00000024325	120	0.6	0.547	0.718
Slc9a1	ENSMUSG00000028854	129	0.6	0.548	0.718
Minpp1	ENSMUSG00000024896	118	0.6	0.55	0.72
Frs2	ENSMUSG00000020170	28	0.6	0.552	0.721
Zc3h7b	ENSMUSG00000022390	53	0.6	0.551	0.721
Ppp1r8	ENSMUSG00000028882	112	0.6	0.551	0.721
Def6	ENSMUSG00000002257	39	0.59	0.553	0.722
Arnt	ENSMUSG00000015522	122	0.59	0.553	0.722
Ifitm1	ENSMUSG00000025491	150	0.59	0.554	0.722
Pds5a	ENSMUSG00000029202	117	0.59	0.554	0.722
Tead1	ENSMUSG00000055320	119	0.59	0.555	0.722
Zc3h3	ENSMUSG00000075600	54	0.59	0.554	0.722
Cir1	ENSMUSG00000041777	110	0.59	0.556	0.723
Ahr	ENSMUSG00000019256	108	0.59	0.558	0.724
Syt11	ENSMUSG00000068923	100	0.58	0.559	0.725
Srf	ENSMUSG00000015605	117	0.58	0.561	0.726
Rab10	ENSMUSG00000020671	115	0.58	0.56	0.726
Nipa1	ENSMUSG00000047037	50	0.58	0.56	0.726
Myh10	ENSMUSG00000020900	114	0.57	0.566	0.732
Glg1	ENSMUSG00000003316	119	0.57	0.567	0.733
Phlda1	ENSMUSG00000020205	120	0.57	0.568	0.733
Cdk16	ENSMUSG00000031065	112	0.57	0.568	0.733
Polr2k	ENSMUSG00000045996	113	0.57	0.569	0.733
Rell1	ENSMUSG00000047881	129	0.57	0.567	0.733
Hltf	ENSMUSG00000002428	80	0.57	0.571	0.734
Dcxr	ENSMUSG00000039450	128	0.57	0.571	0.734
Zfp24	ENSMUSG00000051469	102	0.57	0.571	0.734
Cbr1	ENSMUSG00000051483	111	0.57	0.571	0.734
Fnbp1	ENSMUSG00000075415	124	0.57	0.571	0.734
Zc3h7a	ENSMUSG00000037965	118	0.56	0.576	0.738
Rock1	ENSMUSG00000024290	114	0.56	0.577	0.739
Tes	ENSMUSG00000029552	128	0.56	0.579	0.739
Ilk	ENSMUSG00000030890	114	0.56	0.577	0.739
Bicd2	ENSMUSG00000037933	116	0.56	0.578	0.739
Tjap1	ENSMUSG00000012296	120	0.55	0.584	0.743
Rasa1	ENSMUSG00000021549	120	0.55	0.584	0.743
Rab22a	ENSMUSG00000027519	113	0.55	0.585	0.743
Vgll4	ENSMUSG00000030315	115	0.55	0.583	0.743
Tirap	ENSMUSG00000032041	150	0.55	0.583	0.743
Dnm2	ENSMUSG00000033335	114	0.55	0.583	0.743
S1pr2	ENSMUSG00000043895	117	0.55	0.584	0.743
Slc2a8	ENSMUSG00000026791	134	0.54	0.587	0.745
Prdx3	ENSMUSG00000024997	112	0.54	0.589	0.747
Supt3	ENSMUSG00000038954	126	0.54	0.59	0.747
Nvl	ENSMUSG00000026516	155	0.54	0.591	0.748
Cad	ENSMUSG00000013629	104	0.54	0.592	0.749
Zfand2b	ENSMUSG00000026197	114	0.54	0.592	0.749
Zfp592	ENSMUSG00000005621	73	0.53	0.593	0.749
Ctcf	ENSMUSG00000005698	123	0.53	0.593	0.749
Daxx	ENSMUSG00000002307	114	0.53	0.598	0.752
Sra1	ENSMUSG00000006050	116	0.53	0.598	0.752
Cpne3	ENSMUSG00000028228	114	0.53	0.597	0.752
Zdhhc8	ENSMUSG00000060166	122	0.53	0.597	0.752
Kdm2a	ENSMUSG00000054611	122	0.53	0.599	0.754
Mbd1	ENSMUSG00000024561	130	0.52	0.6	0.754
Nfasc	ENSMUSG00000026442	130	0.52	0.6	0.754
Klhl7	ENSMUSG00000028986	136	0.52	0.6	0.754
Kdm2b	ENSMUSG00000029475	142	0.52	0.601	0.755
Tle1	ENSMUSG00000008305	114	0.52	0.605	0.757
Znhit2	ENSMUSG00000075227	145	0.52	0.606	0.757
Serinc1	ENSMUSG00000019877	113	0.51	0.61	0.76
Stk17b	ENSMUSG00000026094	136	0.51	0.609	0.76
Gatad2b	ENSMUSG00000042390	112	0.51	0.611	0.761
Med28	ENSMUSG00000015804	118	0.51	0.613	0.762
Bag3	ENSMUSG00000030847	111	0.51	0.613	0.762
Asph	ENSMUSG00000028207	114	0.5	0.614	0.763
E2f6	ENSMUSG00000057469	100	0.5	0.616	0.765
Phf6	ENSMUSG00000025626	48	0.5	0.619	0.767
Mtdh	ENSMUSG00000022255	114	0.49	0.621	0.768
Npr1	ENSMUSG00000027931	126	0.49	0.621	0.768
Zfp91	ENSMUSG00000024695	111	0.49	0.625	0.772
Sufu	ENSMUSG00000025231	116	0.49	0.625	0.772
Mphosph8	ENSMUSG00000079184	119	0.49	0.624	0.772
Hsp90b1	ENSMUSG00000020048	172	0.49	0.627	0.773
Tjp1	ENSMUSG00000030516	126	0.48	0.628	0.774
Shc1	ENSMUSG00000042626	112	0.48	0.63	0.776
Rab35	ENSMUSG00000029518	118	0.48	0.631	0.777
Lztr1	ENSMUSG00000022761	115	0.48	0.633	0.779
Smpd3	ENSMUSG00000031906	125	0.47	0.636	0.781
Vezt	ENSMUSG00000036099	145	0.47	0.637	0.781
Kat7	ENSMUSG00000038909	144	0.47	0.635	0.781
Phldb2	ENSMUSG00000033149	114	0.47	0.638	0.783
Calr	ENSMUSG00000003814	158	0.47	0.639	0.784
Cdk9	ENSMUSG00000009555	115	0.46	0.643	0.786
Cand1	ENSMUSG00000020114	116	0.46	0.642	0.786
Nup35	ENSMUSG00000026999	151	0.46	0.643	0.786
Slc7a5	ENSMUSG00000040010	135	0.46	0.643	0.786
Chp1	ENSMUSG00000014077	117	0.46	0.647	0.79
Flywch1	ENSMUSG00000040097	119	0.46	0.647	0.79
Usf2	ENSMUSG00000058239	114	0.46	0.648	0.79
Zscan26	ENSMUSG00000022228	124	0.45	0.649	0.791
Gatad2a	ENSMUSG00000036180	117	0.45	0.649	0.791
Dlg4	ENSMUSG00000020886	123	0.45	0.656	0.798
Mef2d	ENSMUSG00000001419	121	0.44	0.657	0.799
Slc1a5	ENSMUSG00000001918	119	0.44	0.658	0.799
Gsk3b	ENSMUSG00000022812	110	0.44	0.659	0.799
Gnas	ENSMUSG00000027523	116	0.44	0.659	0.799
Fabp4	ENSMUSG00000062515	125	0.44	0.66	0.8
Ing3	ENSMUSG00000029670	87	0.44	0.662	0.802
Lims1	ENSMUSG00000019920	109	0.44	0.663	0.803
Rassf1	ENSMUSG00000010067	113	0.43	0.667	0.804
Ube2b	ENSMUSG00000020390	112	0.43	0.666	0.804
Rcan1	ENSMUSG00000022951	122	0.43	0.668	0.804
Cdc5l	ENSMUSG00000023932	115	0.43	0.666	0.804
Mapre3	ENSMUSG00000029166	146	0.43	0.665	0.804
Arid5a	ENSMUSG00000037447	132	0.43	0.665	0.804
Hcfc2	ENSMUSG00000020246	126	0.43	0.668	0.805
Pvr	ENSMUSG00000040511	117	0.43	0.669	0.805
Smad2	ENSMUSG00000024563	119	0.42	0.671	0.807
Slc12a9	ENSMUSG00000037344	28	0.42	0.672	0.808
Tulp4	ENSMUSG00000034377	112	0.42	0.675	0.809
Ttyh2	ENSMUSG00000034714	135	0.42	0.674	0.809
Zfp326	ENSMUSG00000029290	118	0.42	0.675	0.81
Mapkap1	ENSMUSG00000038696	114	0.42	0.676	0.81
Crlf2	ENSMUSG00000033467	113	0.42	0.677	0.811
Mmgt2	ENSMUSG00000048497	139	0.42	0.677	0.811
Atf1	ENSMUSG00000023027	123	0.41	0.679	0.812
Zdhhc13	ENSMUSG00000030471	121	0.41	0.679	0.812
Camta1	ENSMUSG00000014592	114	0.41	0.683	0.815
Zpr1	ENSMUSG00000032078	119	0.41	0.682	0.815
Dis3l	ENSMUSG00000032396	27	0.41	0.683	0.815
Adora2b	ENSMUSG00000018500	121	0.4	0.689	0.817
Pja2	ENSMUSG00000024083	112	0.4	0.688	0.817
Esrra	ENSMUSG00000024955	125	0.4	0.688	0.817
Sirt7	ENSMUSG00000025138	128	0.4	0.688	0.817
Uimc1	ENSMUSG00000025878	116	0.4	0.686	0.817
Ldlr	ENSMUSG00000032193	81	0.4	0.688	0.817
Tbc1d10a	ENSMUSG00000034412	119	0.4	0.689	0.817
Trrap	ENSMUSG00000045482	128	0.4	0.688	0.817
Znhit6	ENSMUSG00000074182	122	0.4	0.687	0.817
Nsmf	ENSMUSG00000006476	130	0.4	0.69	0.818
Arhgef25	ENSMUSG00000019467	113	0.4	0.692	0.818
Smarca4	ENSMUSG00000032187	112	0.4	0.691	0.818
Taf13	ENSMUSG00000048100	115	0.4	0.692	0.818
Bcr	ENSMUSG00000009681	102	0.39	0.693	0.819
Anxa1	ENSMUSG00000024659	150	0.39	0.694	0.819
Fubp3	ENSMUSG00000026843	126	0.39	0.694	0.819
Map4k5	ENSMUSG00000034761	113	0.39	0.698	0.822
Atxn1	ENSMUSG00000046876	119	0.39	0.699	0.822
Rab18	ENSMUSG00000073639	114	0.39	0.697	0.822
Abi1	ENSMUSG00000058835	113	0.38	0.702	0.825
Apc	ENSMUSG00000005871	134	0.38	0.703	0.827
Sema6d	ENSMUSG00000027200	35	0.38	0.706	0.83
Fam120a	ENSMUSG00000038014	109	0.38	0.707	0.83
Ghr	ENSMUSG00000055737	122	0.37	0.711	0.833
Skil	ENSMUSG00000027660	117	0.37	0.712	0.834
Deaf1	ENSMUSG00000058886	144	0.37	0.711	0.834
Mien1	ENSMUSG00000002580	110	0.36	0.719	0.838
Anxa4	ENSMUSG00000029994	112	0.36	0.719	0.838
Hip1	ENSMUSG00000039959	134	0.36	0.717	0.838
Safb2	ENSMUSG00000042625	118	0.36	0.716	0.838
Wwp1	ENSMUSG00000041058	122	0.36	0.72	0.839
Hbp1	ENSMUSG00000002996	117	0.35	0.723	0.84
Ryk	ENSMUSG00000032547	110	0.35	0.723	0.84
Zfp451	ENSMUSG00000042197	124	0.35	0.724	0.84
Zbtb44	ENSMUSG00000047412	91	0.35	0.723	0.84
Flii	ENSMUSG00000002812	112	0.35	0.725	0.841
Ccnt1	ENSMUSG00000011960	127	0.35	0.728	0.841
Smarcad1	ENSMUSG00000029920	131	0.35	0.728	0.841
Scap	ENSMUSG00000032485	116	0.35	0.726	0.841
Sptan1	ENSMUSG00000057738	113	0.35	0.728	0.841
Nfyb	ENSMUSG00000020248	113	0.34	0.733	0.845
Tpbg	ENSMUSG00000035274	116	0.34	0.733	0.845
Dag1	ENSMUSG00000039952	108	0.34	0.732	0.845
Wtip	ENSMUSG00000036459	30	0.34	0.736	0.847
Crlf3	ENSMUSG00000017561	90	0.33	0.738	0.848
Crcp	ENSMUSG00000025532	136	0.33	0.739	0.848
Kmt5b	ENSMUSG00000045098	122	0.33	0.738	0.848
Zfp655	ENSMUSG00000007812	128	0.33	0.741	0.849
Zfand3	ENSMUSG00000044477	111	0.33	0.741	0.849
Ubqln2	ENSMUSG00000050148	117	0.33	0.741	0.849
Smad5	ENSMUSG00000021540	116	0.33	0.744	0.851
Baiap2	ENSMUSG00000025372	115	0.33	0.745	0.851
Pias3	ENSMUSG00000028101	145	0.33	0.745	0.851
Fermt2	ENSMUSG00000037712	113	0.33	0.743	0.851
Rhob	ENSMUSG00000054364	120	0.33	0.745	0.851
Fer	ENSMUSG00000000127	126	0.32	0.747	0.851
Sap30l	ENSMUSG00000020519	115	0.32	0.747	0.851
Acvr1	ENSMUSG00000026836	137	0.32	0.746	0.851
Eed	ENSMUSG00000030619	127	0.32	0.747	0.851
Akap7	ENSMUSG00000039166	34	0.32	0.747	0.851
Fzd7	ENSMUSG00000041075	30	0.32	0.748	0.851
Pknox1	ENSMUSG00000006705	126	0.32	0.75	0.852
Bcar1	ENSMUSG00000031955	132	0.32	0.749	0.852
Atp2b1	ENSMUSG00000019943	112	0.32	0.751	0.854
Snx9	ENSMUSG00000002365	115	0.31	0.755	0.856
Preb	ENSMUSG00000045302	124	0.31	0.754	0.856
Cdc42ep3	ENSMUSG00000036533	125	0.31	0.757	0.858
Tgfb1	ENSMUSG00000002603	113	0.3	0.762	0.862
Prkci	ENSMUSG00000037643	100	0.3	0.761	0.862
Zfp414	ENSMUSG00000073423	112	0.3	0.763	0.864
Lmbr1l	ENSMUSG00000022999	122	0.3	0.766	0.866
Src	ENSMUSG00000027646	123	0.3	0.765	0.866
Pbxip1	ENSMUSG00000042613	112	0.29	0.77	0.868
Piezo1	ENSMUSG00000014444	140	0.29	0.772	0.869
Tmem127	ENSMUSG00000034850	136	0.29	0.771	0.869
Adam9	ENSMUSG00000031555	113	0.29	0.774	0.87
Chmp3	ENSMUSG00000053119	110	0.29	0.773	0.87
B2m	ENSMUSG00000060802	216	0.29	0.773	0.87
Nf2	ENSMUSG00000009073	92	0.28	0.777	0.871
Gjc1	ENSMUSG00000034520	96	0.28	0.777	0.872
Zfp30	ENSMUSG00000047473	77	0.28	0.778	0.872
Elk3	ENSMUSG00000008398	119	0.28	0.782	0.873
Hipk1	ENSMUSG00000008730	135	0.28	0.782	0.873
Rsf1	ENSMUSG00000035623	119	0.28	0.779	0.873
Ascc3	ENSMUSG00000038774	142	0.28	0.78	0.873
Csde1	ENSMUSG00000068823	114	0.28	0.781	0.873
Ror2	ENSMUSG00000021464	137	0.28	0.783	0.874
Llgl1	ENSMUSG00000020536	134	0.27	0.786	0.876
Fzd2	ENSMUSG00000050288	115	0.27	0.786	0.876
Zbtb21	ENSMUSG00000046962	139	0.27	0.787	0.877
Abl1	ENSMUSG00000026842	134	0.27	0.789	0.878
Pcgf3	ENSMUSG00000033623	132	0.27	0.788	0.878
Nln	ENSMUSG00000021710	30	0.26	0.793	0.883
Tulp3	ENSMUSG00000001521	137	0.26	0.795	0.884
Zc3h13	ENSMUSG00000022000	120	0.26	0.796	0.884
Nae1	ENSMUSG00000031878	116	0.26	0.798	0.885
Klf4	ENSMUSG00000003032	244	0.25	0.801	0.888
Myof	ENSMUSG00000048612	113	0.25	0.802	0.888
Ecscr	ENSMUSG00000073599	121	0.25	0.802	0.888
Rftn1	ENSMUSG00000039316	119	0.24	0.807	0.891
E2f1	ENSMUSG00000027490	130	0.24	0.814	0.897
Klf9	ENSMUSG00000033863	116	0.23	0.817	0.899
Hoxb2	ENSMUSG00000075588	114	0.23	0.818	0.9
Sod1	ENSMUSG00000022982	116	0.23	0.821	0.902
Daam1	ENSMUSG00000034574	128	0.23	0.821	0.902
Ecsit	ENSMUSG00000066839	127	0.23	0.822	0.902
Zfp652	ENSMUSG00000075595	120	0.22	0.822	0.902
Asf1a	ENSMUSG00000019857	123	0.22	0.826	0.905
Rel	ENSMUSG00000020275	25	0.22	0.828	0.906
Esyt1	ENSMUSG00000025366	115	0.22	0.829	0.906
Zkscan1	ENSMUSG00000029729	86	0.22	0.829	0.906
Mdfic	ENSMUSG00000041390	117	0.22	0.828	0.906
Bmi1	ENSMUSG00000026739	130	0.21	0.832	0.907
Zranb1	ENSMUSG00000030967	125	0.21	0.831	0.907
Panx1	ENSMUSG00000031934	118	0.21	0.837	0.911
Dedd	ENSMUSG00000013973	86	0.2	0.838	0.911
Vps4a	ENSMUSG00000031913	119	0.2	0.838	0.911
Jam3	ENSMUSG00000031990	116	0.2	0.838	0.911
Trafd1	ENSMUSG00000042726	121	0.2	0.838	0.911
Zfp36l2	ENSMUSG00000045817	116	0.2	0.838	0.911
Ubl3	ENSMUSG00000001687	112	0.2	0.84	0.912
Itgb1bp1	ENSMUSG00000062352	116	0.2	0.84	0.912
Cnot4	ENSMUSG00000038784	115	0.2	0.841	0.913
Prdm2	ENSMUSG00000057637	128	0.2	0.844	0.915
Zmynd19	ENSMUSG00000026974	138	0.2	0.845	0.916
Kras	ENSMUSG00000030265	118	0.2	0.845	0.916
Baz1a	ENSMUSG00000035021	113	0.19	0.846	0.916
Cdkn2a	ENSMUSG00000044303	130	0.18	0.856	0.924
Cdk8	ENSMUSG00000029635	133	0.18	0.857	0.925
Bst2	ENSMUSG00000046718	118	0.18	0.858	0.925
Fkrp	ENSMUSG00000048920	133	0.18	0.86	0.926
Mark3	ENSMUSG00000007411	110	0.17	0.863	0.929
Zfp638	ENSMUSG00000030016	119	0.17	0.864	0.929
Emsy	ENSMUSG00000035401	120	0.17	0.863	0.929
Vasn	ENSMUSG00000039646	109	0.17	0.868	0.93
Zmym5	ENSMUSG00000040123	121	0.17	0.868	0.93
Rit1	ENSMUSG00000028057	111	0.16	0.869	0.931
Pard3	ENSMUSG00000025812	154	0.16	0.871	0.932
Trim24	ENSMUSG00000029833	147	0.16	0.875	0.935
Dr1	ENSMUSG00000029265	112	0.15	0.88	0.939
Aqp1	ENSMUSG00000004655	60	0.15	0.884	0.941
Zfp740	ENSMUSG00000046897	127	0.15	0.883	0.941
Pard6g	ENSMUSG00000056214	96	0.15	0.882	0.941
Itga5	ENSMUSG00000000555	113	0.14	0.89	0.943
Kmt2a	ENSMUSG00000002028	122	0.14	0.89	0.943
Tef	ENSMUSG00000022389	54	0.14	0.887	0.943
Gtf2ird1	ENSMUSG00000023079	118	0.14	0.888	0.943
Ilf3	ENSMUSG00000032178	118	0.14	0.887	0.943
Ap2a1	ENSMUSG00000060279	122	0.14	0.887	0.943
Krit1	ENSMUSG00000000600	117	0.14	0.892	0.944
Plxnb2	ENSMUSG00000036606	110	0.14	0.892	0.944
Hivep3	ENSMUSG00000028634	153	0.13	0.894	0.946
Ldb1	ENSMUSG00000025223	126	0.13	0.896	0.947
Crebzf	ENSMUSG00000051451	89	0.13	0.897	0.947
Irak1	ENSMUSG00000031392	115	0.12	0.903	0.952
Zfp637	ENSMUSG00000059689	110	0.12	0.904	0.952
Itgb1	ENSMUSG00000025809	123	0.12	0.907	0.953
Cnot1	ENSMUSG00000036550	123	0.12	0.905	0.953
Cdc42bpb	ENSMUSG00000021279	137	0.11	0.91	0.954
Bace1	ENSMUSG00000032086	125	0.11	0.91	0.954
Nfxl1	ENSMUSG00000072889	122	0.11	0.909	0.954
Gbf1	ENSMUSG00000025224	121	0.11	0.912	0.955
Zfp106	ENSMUSG00000027288	117	0.11	0.916	0.956
Pml	ENSMUSG00000036986	74	0.11	0.914	0.956
Piezo2	ENSMUSG00000041482	122	0.11	0.916	0.956
Cggbp1	ENSMUSG00000054604	114	0.11	0.913	0.956
Nr4a1	ENSMUSG00000023034	263	0.1	0.917	0.956
Rab3gap2	ENSMUSG00000039318	110	0.1	0.917	0.956
Slc7a7	ENSMUSG00000000958	60	0.1	0.92	0.958
Ssh1	ENSMUSG00000042121	125	0.1	0.92	0.958
Vav2	ENSMUSG00000009621	141	0.1	0.922	0.959
Ino80b	ENSMUSG00000030034	120	0.1	0.924	0.959
Gprc5b	ENSMUSG00000008734	114	0.09	0.925	0.959
Pxn	ENSMUSG00000029528	115	0.09	0.925	0.959
Prkar2a	ENSMUSG00000032601	115	0.09	0.925	0.959
Strn3	ENSMUSG00000020954	115	0.09	0.932	0.964
Mef2a	ENSMUSG00000030557	114	0.09	0.932	0.964
Bach1	ENSMUSG00000025612	122	0.08	0.933	0.964
Mpdz	ENSMUSG00000028402	137	0.08	0.932	0.964
Clip3	ENSMUSG00000013921	118	0.08	0.934	0.965
Necap1	ENSMUSG00000030327	155	0.07	0.946	0.972
Hcfc1	ENSMUSG00000031386	112	0.07	0.945	0.972
Siah1a	ENSMUSG00000036840	125	0.07	0.945	0.972
Orai1	ENSMUSG00000049686	145	0.07	0.946	0.972
Vamp2	ENSMUSG00000020894	117	0.06	0.953	0.976
Vcl	ENSMUSG00000021823	122	0.06	0.952	0.976
Usp16	ENSMUSG00000025616	113	0.06	0.954	0.976
Baz1b	ENSMUSG00000002748	121	0.05	0.958	0.979
Ubr2	ENSMUSG00000023977	126	0.05	0.957	0.979
Ddit3	ENSMUSG00000025408	125	0.05	0.957	0.979
Atf3	ENSMUSG00000026628	143	0.05	0.959	0.979
Sec16a	ENSMUSG00000026924	123	0.05	0.96	0.979
Cdc42ep4	ENSMUSG00000041598	148	0.05	0.959	0.979
Zfp260	ENSMUSG00000049421	113	0.05	0.96	0.979
Cpne2	ENSMUSG00000034361	110	0.05	0.962	0.98
Wnt5a	ENSMUSG00000021994	120	0.04	0.965	0.982
Myh9	ENSMUSG00000022443	110	0.04	0.965	0.982
Taf3	ENSMUSG00000025782	137	0.04	0.967	0.982
Htatsf1	ENSMUSG00000067873	122	0.04	0.969	0.983
Ncstn	ENSMUSG00000003458	116	0.04	0.971	0.984
Baz2b	ENSMUSG00000026987	118	0.03	0.974	0.984
P2rx4	ENSMUSG00000029470	119	0.03	0.974	0.984
Ago1	ENSMUSG00000041530	33	0.03	0.974	0.984
Vamp5	ENSMUSG00000073002	115	0.03	0.973	0.984
Clock	ENSMUSG00000029238	153	0.02	0.982	0.988
Chd2	ENSMUSG00000078671	135	0.02	0.982	0.988
Phtf1	ENSMUSG00000058388	127	0.02	0.985	0.991
Flna	ENSMUSG00000031328	114	0.01	0.991	0.993
Creb3l2	ENSMUSG00000038648	115	0.01	0.989	0.993
Ccdc88a	ENSMUSG00000032740	116	0.01	0.992	0.994
Rhoc	ENSMUSG00000002233	123	0.01	0.994	0.995
Stoml1	ENSMUSG00000032333	129	0	0.997	0.997
Nfatc1	ENSMUSG00000033016	90	0	0.996	0.997
Aff1	ENSMUSG00000029313	36	0	0.999	0.999
Vegfa	ENSMUSG00000023951	132	-0.01	0.99	0.993
Ago2	ENSMUSG00000036698	121	-0.01	0.99	0.993
Zfp560	ENSMUSG00000045519	114	-0.01	0.991	0.993
Maf	ENSMUSG00000055435	121	-0.01	0.992	0.994
Cry2	ENSMUSG00000068742	37	-0.02	0.981	0.988
Maea	ENSMUSG00000079562	109	-0.02	0.985	0.991
Pak1	ENSMUSG00000030774	117	-0.02	0.987	0.992
Prrx2	ENSMUSG00000039476	111	-0.02	0.987	0.992
Sox9	ENSMUSG00000000567	127	-0.03	0.972	0.984
Nfat5	ENSMUSG00000003847	112	-0.03	0.972	0.984
Hes1	ENSMUSG00000022528	113	-0.03	0.974	0.984
Wwtr1	ENSMUSG00000027803	110	-0.03	0.972	0.984
Zbtb38	ENSMUSG00000040433	111	-0.03	0.975	0.984
Mmp14	ENSMUSG00000000957	126	-0.03	0.978	0.987
Clcn5	ENSMUSG00000004317	132	-0.03	0.979	0.987
Zfp148	ENSMUSG00000022811	116	-0.03	0.978	0.987
Rusc1	ENSMUSG00000041263	123	-0.03	0.979	0.987
Spred1	ENSMUSG00000027351	120	-0.04	0.965	0.982
Nrbf2	ENSMUSG00000075000	117	-0.04	0.966	0.982
Pdpk1	ENSMUSG00000024122	137	-0.04	0.968	0.983
Enpep	ENSMUSG00000028024	169	-0.04	0.969	0.983
Rarg	ENSMUSG00000001288	117	-0.04	0.972	0.984
Srgap2	ENSMUSG00000026425	140	-0.04	0.97	0.984
Ada	ENSMUSG00000017697	48	-0.05	0.961	0.979
Trp53i13	ENSMUSG00000044328	117	-0.05	0.959	0.979
Aff4	ENSMUSG00000049470	115	-0.05	0.962	0.98
Trip11	ENSMUSG00000021188	115	-0.06	0.948	0.974
Ahcyl1	ENSMUSG00000027893	113	-0.06	0.949	0.974
Mdm4	ENSMUSG00000054387	143	-0.06	0.95	0.975
Ak1	ENSMUSG00000026817	116	-0.06	0.954	0.976
Fbxw7	ENSMUSG00000028086	53	-0.06	0.953	0.976
Tmem219	ENSMUSG00000060538	113	-0.06	0.954	0.976
Clmp	ENSMUSG00000032024	111	-0.07	0.941	0.97
Rab40c	ENSMUSG00000025730	148	-0.07	0.942	0.971
Nf1	ENSMUSG00000020716	117	-0.07	0.946	0.972
Pim1	ENSMUSG00000024014	117	-0.07	0.943	0.972
Atp9b	ENSMUSG00000024566	158	-0.07	0.945	0.972
Zfyve16	ENSMUSG00000021706	45	-0.08	0.938	0.968
Taf1	ENSMUSG00000031314	159	-0.08	0.938	0.968
Vopp1	ENSMUSG00000037788	106	-0.08	0.94	0.97
Casp8ap2	ENSMUSG00000028282	148	-0.09	0.924	0.959
Nfx1	ENSMUSG00000028423	114	-0.09	0.927	0.96
Slc16a2	ENSMUSG00000033965	115	-0.09	0.927	0.96
Rdx	ENSMUSG00000032050	113	-0.09	0.93	0.963
Sos1	ENSMUSG00000024241	47	-0.1	0.917	0.956
Zbtb7b	ENSMUSG00000028042	150	-0.1	0.918	0.956
Kdm5c	ENSMUSG00000025332	137	-0.1	0.921	0.959
Cers6	ENSMUSG00000027035	151	-0.1	0.924	0.959
Arl4c	ENSMUSG00000049866	118	-0.1	0.924	0.959
Mmgt1	ENSMUSG00000061273	47	-0.1	0.921	0.959
Zfp639	ENSMUSG00000027667	116	-0.11	0.909	0.954
Tcf12	ENSMUSG00000032228	115	-0.11	0.909	0.954
Pcbd2	ENSMUSG00000021496	109	-0.11	0.915	0.956
Ehmt1	ENSMUSG00000036893	116	-0.11	0.914	0.956
Fzd1	ENSMUSG00000044674	118	-0.11	0.913	0.956
Zfp266	ENSMUSG00000060510	119	-0.11	0.915	0.956
Fam126a	ENSMUSG00000028995	51	-0.12	0.901	0.95
Scand1	ENSMUSG00000046229	110	-0.12	0.901	0.95
Tcaf1	ENSMUSG00000036667	131	-0.12	0.902	0.951
Slc22a17	ENSMUSG00000022199	134	-0.12	0.905	0.952
Ets1	ENSMUSG00000032035	129	-0.12	0.906	0.953
Pik3ca	ENSMUSG00000027665	129	-0.12	0.908	0.954
Mfsd5	ENSMUSG00000045665	116	-0.13	0.896	0.947
Sri	ENSMUSG00000003161	113	-0.13	0.898	0.948
Helz	ENSMUSG00000020721	122	-0.14	0.886	0.943
Nsd1	ENSMUSG00000021488	119	-0.14	0.89	0.943
Zxdc	ENSMUSG00000034430	90	-0.14	0.886	0.943
Ankrd11	ENSMUSG00000035569	114	-0.14	0.891	0.943
Snai1	ENSMUSG00000042821	126	-0.14	0.888	0.943
Ptp4a3	ENSMUSG00000059895	118	-0.14	0.888	0.943
Arid1b	ENSMUSG00000069729	137	-0.14	0.892	0.944
Sema4c	ENSMUSG00000026121	132	-0.15	0.882	0.941
Icmt	ENSMUSG00000039662	106	-0.16	0.87	0.931
Sp140	ENSMUSG00000070031	154	-0.16	0.87	0.931
Pdia6	ENSMUSG00000020571	168	-0.16	0.874	0.933
Enah	ENSMUSG00000022995	118	-0.16	0.872	0.933
Xrn1	ENSMUSG00000032410	127	-0.16	0.874	0.933
Zfp623	ENSMUSG00000050846	92	-0.17	0.862	0.928
Slc11a2	ENSMUSG00000023030	132	-0.17	0.866	0.929
Pi4k2a	ENSMUSG00000025178	147	-0.17	0.864	0.929
Pip4k2a	ENSMUSG00000026737	51	-0.17	0.866	0.929
Zbtb7a	ENSMUSG00000035011	107	-0.17	0.866	0.929
Rab11fip2	ENSMUSG00000040022	138	-0.17	0.866	0.929
Zmym2	ENSMUSG00000021945	64	-0.17	0.868	0.93
Phlda3	ENSMUSG00000041801	113	-0.18	0.854	0.923
Id3	ENSMUSG00000007872	126	-0.18	0.856	0.924
Tbp	ENSMUSG00000014767	36	-0.18	0.856	0.924
Slc6a6	ENSMUSG00000030096	127	-0.19	0.846	0.916
Prr7	ENSMUSG00000034686	132	-0.19	0.847	0.916
Laptm4a	ENSMUSG00000020585	131	-0.19	0.85	0.919
Zfp821	ENSMUSG00000031728	27	-0.19	0.851	0.92
Zfp385a	ENSMUSG00000000552	123	-0.2	0.839	0.911
Abcc1	ENSMUSG00000023088	138	-0.21	0.834	0.91
Cebpb	ENSMUSG00000056501	121	-0.21	0.836	0.911
Braf	ENSMUSG00000002413	82	-0.22	0.825	0.905
Ezh1	ENSMUSG00000006920	37	-0.22	0.829	0.906
Eaf1	ENSMUSG00000021890	139	-0.22	0.828	0.906
Add3	ENSMUSG00000025026	116	-0.22	0.827	0.906
Rasgrp2	ENSMUSG00000032946	31	-0.22	0.828	0.906
Pi4ka	ENSMUSG00000041720	57	-0.23	0.817	0.899
Magee1	ENSMUSG00000031227	129	-0.23	0.819	0.901
Rcor1	ENSMUSG00000037896	58	-0.23	0.82	0.902
Scmh1	ENSMUSG00000000085	125	-0.24	0.807	0.891
Ptpn12	ENSMUSG00000028771	117	-0.24	0.807	0.891
Zbtb4	ENSMUSG00000018750	127	-0.24	0.809	0.893
Ttyh3	ENSMUSG00000036565	131	-0.24	0.812	0.896
Dlg2	ENSMUSG00000052572	44	-0.24	0.813	0.896
Limd1	ENSMUSG00000025239	113	-0.24	0.814	0.897
Ppm1a	ENSMUSG00000021096	116	-0.25	0.802	0.888
Cbl	ENSMUSG00000034342	110	-0.25	0.802	0.888
Ndufa13	ENSMUSG00000036199	123	-0.25	0.801	0.888
Ttc17	ENSMUSG00000027194	40	-0.26	0.796	0.884
Inhba	ENSMUSG00000041324	175	-0.26	0.797	0.885
Foxo1	ENSMUSG00000044167	141	-0.26	0.798	0.885
Rab3a	ENSMUSG00000031840	152	-0.27	0.788	0.878
Rc3h1	ENSMUSG00000040423	131	-0.28	0.779	0.872
Mrap	ENSMUSG00000039956	90	-0.28	0.781	0.873
Arhgap35	ENSMUSG00000058230	115	-0.28	0.781	0.873
Dlg1	ENSMUSG00000022770	144	-0.29	0.769	0.868
2019-09-02	ENSMUSG00000026276	115	-0.29	0.769	0.868
Gem	ENSMUSG00000028214	114	-0.29	0.769	0.868
Orc2	ENSMUSG00000026037	127	-0.29	0.773	0.87
Bdp1	ENSMUSG00000049658	125	-0.29	0.774	0.87
Cavin1	ENSMUSG00000004044	112	-0.29	0.776	0.871
Dmpk	ENSMUSG00000030409	130	-0.29	0.776	0.871
D430042O09Rik	ENSMUSG00000032743	137	-0.3	0.765	0.866
Rc3h2	ENSMUSG00000075376	119	-0.3	0.768	0.867
Pofut1	ENSMUSG00000046020	91	-0.31	0.755	0.856
Furin	ENSMUSG00000030530	113	-0.31	0.76	0.861
Gpsm1	ENSMUSG00000026930	98	-0.32	0.745	0.851
Spen	ENSMUSG00000040761	70	-0.32	0.748	0.851
Serinc3	ENSMUSG00000017707	113	-0.33	0.739	0.848
Ppp3cb	ENSMUSG00000021816	116	-0.33	0.74	0.849
Rab8b	ENSMUSG00000036943	132	-0.33	0.744	0.851
Hoxb4	ENSMUSG00000038692	77	-0.34	0.732	0.845
Tln2	ENSMUSG00000052698	121	-0.34	0.732	0.845
Rab3d	ENSMUSG00000019066	123	-0.34	0.736	0.847
Hspa5	ENSMUSG00000026864	190	-0.34	0.735	0.847
Ephb3	ENSMUSG00000005958	163	-0.35	0.723	0.84
Slc41a1	ENSMUSG00000013275	80	-0.35	0.723	0.84
Klf6	ENSMUSG00000000078	114	-0.35	0.725	0.841
Gabbr1	ENSMUSG00000024462	84	-0.35	0.726	0.841
Foxn3	ENSMUSG00000033713	116	-0.35	0.725	0.841
Pip5k1c	ENSMUSG00000034902	99	-0.35	0.726	0.841
Maml2	ENSMUSG00000031925	117	-0.35	0.73	0.843
Pacsin3	ENSMUSG00000027257	130	-0.36	0.715	0.837
Nisch	ENSMUSG00000021910	110	-0.36	0.717	0.838
Atp10a	ENSMUSG00000025324	55	-0.36	0.717	0.838
Ncor2	ENSMUSG00000029478	117	-0.36	0.719	0.838
Upf3a	ENSMUSG00000038398	125	-0.36	0.721	0.839
Stat2	ENSMUSG00000040033	42	-0.36	0.721	0.839
Gypc	ENSMUSG00000090523	146	-0.37	0.713	0.835
Arid1a	ENSMUSG00000007880	115	-0.38	0.706	0.83
Mr1	ENSMUSG00000026471	129	-0.38	0.707	0.83
Rhou	ENSMUSG00000039960	116	-0.38	0.707	0.83
Tnks1bp1	ENSMUSG00000033955	117	-0.39	0.694	0.819
Nfe2l1	ENSMUSG00000038615	114	-0.39	0.697	0.822
Zmat5	ENSMUSG00000009076	123	-0.4	0.689	0.817
Lrig3	ENSMUSG00000020105	149	-0.4	0.689	0.817
Arhgef7	ENSMUSG00000031511	135	-0.4	0.689	0.817
Arid2	ENSMUSG00000033237	153	-0.4	0.69	0.817
Mier1	ENSMUSG00000028522	114	-0.4	0.691	0.818
Zfx	ENSMUSG00000079509	119	-0.41	0.679	0.812
Tmem30a	ENSMUSG00000032328	113	-0.41	0.683	0.815
Atxn7	ENSMUSG00000021738	128	-0.43	0.667	0.804
Nedd4	ENSMUSG00000032216	141	-0.43	0.667	0.804
Pkd2	ENSMUSG00000034462	110	-0.43	0.666	0.804
Cd164	ENSMUSG00000019818	112	-0.43	0.669	0.805
Slc41a2	ENSMUSG00000034591	35	-0.43	0.671	0.807
Bmpr2	ENSMUSG00000067336	117	-0.44	0.662	0.802
Smurf1	ENSMUSG00000038780	43	-0.45	0.651	0.792
Lrrc8a	ENSMUSG00000007476	126	-0.45	0.651	0.793
Rb1cc1	ENSMUSG00000025907	119	-0.45	0.655	0.797
Rapgef6	ENSMUSG00000037533	147	-0.46	0.643	0.786
Meis3	ENSMUSG00000041420	109	-0.46	0.643	0.786
Ptp4a1	ENSMUSG00000026064	118	-0.46	0.647	0.79
Ash1l	ENSMUSG00000028053	116	-0.47	0.641	0.785
Slc17a5	ENSMUSG00000049624	81	-0.48	0.633	0.778
Tnfsf9	ENSMUSG00000035678	131	-0.49	0.621	0.768
Apoe	ENSMUSG00000002985	151	-0.49	0.627	0.773
Epc2	ENSMUSG00000069495	157	-0.49	0.626	0.773
Smarca2	ENSMUSG00000024921	108	-0.5	0.617	0.765
Phf2	ENSMUSG00000038025	45	-0.5	0.617	0.765
Tgoln1	ENSMUSG00000056429	109	-0.5	0.619	0.767
Snapc5	ENSMUSG00000032398	112	-0.51	0.607	0.758
Dnajb4	ENSMUSG00000028035	111	-0.51	0.608	0.759
Htt	ENSMUSG00000029104	119	-0.51	0.61	0.76
Ncoa6	ENSMUSG00000038369	93	-0.51	0.609	0.76
Macf1	ENSMUSG00000028649	115	-0.51	0.611	0.761
Myo1b	ENSMUSG00000018417	128	-0.51	0.613	0.762
Pcgf2	ENSMUSG00000018537	112	-0.52	0.602	0.755
Cntfr	ENSMUSG00000028444	74	-0.52	0.604	0.756
Wasl	ENSMUSG00000029684	119	-0.52	0.604	0.756
Hsbp1	ENSMUSG00000031839	119	-0.52	0.603	0.756
Ppp1r10	ENSMUSG00000039220	111	-0.52	0.604	0.756
Trak2	ENSMUSG00000026028	37	-0.53	0.593	0.749
Foxo3	ENSMUSG00000048756	124	-0.53	0.593	0.749
Jmy	ENSMUSG00000021690	130	-0.53	0.596	0.752
Mga	ENSMUSG00000033943	122	-0.53	0.598	0.752
Ahctf1	ENSMUSG00000026491	127	-0.54	0.586	0.744
Atp6v1g1	ENSMUSG00000039105	118	-0.54	0.587	0.745
Plekha1	ENSMUSG00000040268	128	-0.55	0.579	0.739
Fndc4	ENSMUSG00000038552	126	-0.55	0.585	0.743
Taf1b	ENSMUSG00000059669	26	-0.55	0.584	0.743
Itpr2	ENSMUSG00000030287	34	-0.56	0.573	0.736
Stag2	ENSMUSG00000025862	138	-0.56	0.576	0.738
Gabra3	ENSMUSG00000031343	118	-0.56	0.575	0.738
Ep300	ENSMUSG00000055024	114	-0.56	0.575	0.738
Slc39a14	ENSMUSG00000022094	117	-0.56	0.577	0.739
Chd9	ENSMUSG00000056608	116	-0.56	0.578	0.739
Zfhx3	ENSMUSG00000038872	122	-0.57	0.566	0.732
Tcf7l1	ENSMUSG00000055799	149	-0.57	0.569	0.734
Hivep2	ENSMUSG00000015501	139	-0.58	0.559	0.725
Tns2	ENSMUSG00000037003	147	-0.58	0.563	0.728
Atf6	ENSMUSG00000026663	127	-0.59	0.555	0.722
Nr2f2	ENSMUSG00000030551	115	-0.59	0.556	0.723
Zmiz1	ENSMUSG00000007817	109	-0.6	0.546	0.718
Arhgap10	ENSMUSG00000037148	120	-0.6	0.547	0.718
Mylip	ENSMUSG00000038175	54	-0.6	0.547	0.718
Arntl	ENSMUSG00000055116	110	-0.6	0.548	0.718
Kmt2c	ENSMUSG00000038056	135	-0.6	0.55	0.72
Zfp703	ENSMUSG00000085795	28	-0.6	0.551	0.721
Ccnl1	ENSMUSG00000027829	111	-0.61	0.54	0.713
Flnb	ENSMUSG00000025278	126	-0.62	0.534	0.708
Acly	ENSMUSG00000020917	115	-0.62	0.534	0.709
Crebbp	ENSMUSG00000022521	123	-0.62	0.535	0.709
Arap1	ENSMUSG00000032812	121	-0.62	0.535	0.709
Hipk3	ENSMUSG00000027177	116	-0.63	0.526	0.702
Gli3	ENSMUSG00000021318	150	-0.64	0.521	0.698
Tmf1	ENSMUSG00000030059	116	-0.64	0.52	0.698
Etv6	ENSMUSG00000030199	130	-0.64	0.521	0.698
Vangl1	ENSMUSG00000027860	41	-0.64	0.522	0.699
Zfp280d	ENSMUSG00000038535	44	-0.65	0.514	0.694
Sertad1	ENSMUSG00000008384	113	-0.66	0.507	0.688
Adcy3	ENSMUSG00000020654	137	-0.66	0.507	0.688
Elk4	ENSMUSG00000026436	124	-0.66	0.506	0.688
Ikbkb	ENSMUSG00000031537	125	-0.66	0.509	0.688
Srr	ENSMUSG00000001323	64	-0.66	0.51	0.69
Stx4a	ENSMUSG00000030805	113	-0.66	0.512	0.691
Smad4	ENSMUSG00000024515	128	-0.67	0.504	0.688
Iqgap1	ENSMUSG00000030536	116	-0.67	0.505	0.688
Zfc3h1	ENSMUSG00000034163	133	-0.67	0.506	0.688
Fcho2	ENSMUSG00000041685	133	-0.67	0.505	0.688
Stx2	ENSMUSG00000029428	122	-0.68	0.499	0.685
Ogt	ENSMUSG00000034160	119	-0.69	0.488	0.678
Igsf8	ENSMUSG00000038034	112	-0.69	0.492	0.68
Rab15	ENSMUSG00000021062	90	-0.7	0.481	0.671
Tshz3	ENSMUSG00000021217	98	-0.71	0.478	0.669
Fos	ENSMUSG00000021250	362	-0.71	0.475	0.669
Zzef1	ENSMUSG00000055670	132	-0.71	0.476	0.669
Cebpg	ENSMUSG00000056216	120	-0.71	0.477	0.669
Tanc1	ENSMUSG00000035168	127	-0.71	0.48	0.67
Zfp9	ENSMUSG00000072623	127	-0.71	0.48	0.67
Pdgfc	ENSMUSG00000028019	155	-0.72	0.473	0.666
Tmem47	ENSMUSG00000025666	129	-0.73	0.467	0.663
Tmem59	ENSMUSG00000028618	116	-0.73	0.468	0.663
Cdkn1b	ENSMUSG00000003031	127	-0.73	0.468	0.664
Hoxb6	ENSMUSG00000000690	70	-0.75	0.453	0.648
Elf1	ENSMUSG00000036461	120	-0.76	0.446	0.642
Chic2	ENSMUSG00000029229	115	-0.76	0.448	0.644
Foxn2	ENSMUSG00000034998	57	-0.76	0.448	0.644
Tead3	ENSMUSG00000002249	75	-0.77	0.443	0.64
Drap1	ENSMUSG00000024914	113	-0.77	0.442	0.64
Bnc2	ENSMUSG00000028487	126	-0.77	0.443	0.64
Notch2	ENSMUSG00000027878	128	-0.78	0.437	0.637
Pbx1	ENSMUSG00000052534	112	-0.78	0.437	0.637
Zc3h11a	ENSMUSG00000102976	128	-0.78	0.438	0.638
Cyba	ENSMUSG00000006519	119	-0.79	0.431	0.632
Slc39a6	ENSMUSG00000024270	117	-0.8	0.423	0.626
Gpc1	ENSMUSG00000034220	120	-0.81	0.419	0.623
Ap2b1	ENSMUSG00000035152	115	-0.82	0.411	0.617
Adgrd1	ENSMUSG00000044017	111	-0.82	0.414	0.619
S100a6	ENSMUSG00000001025	200	-0.83	0.408	0.616
Trip10	ENSMUSG00000019487	113	-0.83	0.408	0.616
Ppp1r9b	ENSMUSG00000038976	133	-0.84	0.401	0.611
Camkk2	ENSMUSG00000029471	119	-0.85	0.397	0.609
Sipa1l1	ENSMUSG00000042700	36	-0.86	0.389	0.601
Nfkbiz	ENSMUSG00000035356	119	-0.87	0.385	0.599
Setd1b	ENSMUSG00000038384	79	-0.87	0.384	0.599
Rybp	ENSMUSG00000072872	26	-0.87	0.383	0.599
Sgms2	ENSMUSG00000050931	86	-0.88	0.377	0.593
Cd47	ENSMUSG00000055447	126	-0.88	0.378	0.595
Utrn	ENSMUSG00000019820	125	-0.88	0.38	0.596
Klf7	ENSMUSG00000025959	116	-0.88	0.38	0.596
Eid1	ENSMUSG00000091337	112	-0.89	0.371	0.589
Rab23	ENSMUSG00000004768	31	-0.89	0.373	0.59
Aes	ENSMUSG00000054452	118	-0.89	0.372	0.59
Zhx1	ENSMUSG00000022361	162	-0.89	0.375	0.591
Gab2	ENSMUSG00000004508	86	-0.9	0.369	0.587
Slc41a3	ENSMUSG00000030089	157	-0.93	0.352	0.568
Irf1	ENSMUSG00000018899	110	-0.93	0.354	0.569
Klf3	ENSMUSG00000029178	112	-0.93	0.352	0.569
Plekha2	ENSMUSG00000031557	128	-0.93	0.354	0.569
Ikzf5	ENSMUSG00000040167	150	-0.93	0.353	0.569
Itch	ENSMUSG00000027598	146	-0.96	0.336	0.553
Rbm39	ENSMUSG00000027620	122	-0.96	0.337	0.553
Tshz1	ENSMUSG00000046982	125	-0.96	0.337	0.553
Pdcd4	ENSMUSG00000024975	112	-0.98	0.325	0.54
Nr1d2	ENSMUSG00000021775	132	-0.98	0.326	0.542
Marveld1	ENSMUSG00000044345	124	-0.98	0.328	0.543
Sulf1	ENSMUSG00000016918	111	-0.99	0.322	0.539
Slc38a2	ENSMUSG00000022462	108	-0.99	0.322	0.539
Mbd2	ENSMUSG00000024513	133	-1	0.318	0.536
Arl4a	ENSMUSG00000047446	108	-1.01	0.312	0.528
Prkca	ENSMUSG00000050965	134	-1.01	0.311	0.528
Dtnbp1	ENSMUSG00000057531	111	-1.01	0.312	0.528
Dcun1d3	ENSMUSG00000048787	48	-1.02	0.306	0.522
Pkn2	ENSMUSG00000004591	117	-1.04	0.298	0.516
Wnt2	ENSMUSG00000010797	137	-1.04	0.297	0.516
F2r	ENSMUSG00000048376	128	-1.04	0.299	0.516
App	ENSMUSG00000022892	127	-1.05	0.292	0.511
Atp11a	ENSMUSG00000031441	129	-1.05	0.293	0.513
Trak1	ENSMUSG00000032536	65	-1.05	0.294	0.514
Tmem150a	ENSMUSG00000055912	110	-1.06	0.288	0.506
Pdlim5	ENSMUSG00000028273	116	-1.06	0.291	0.509
Myadm	ENSMUSG00000068566	113	-1.07	0.285	0.502
Foxp1	ENSMUSG00000030067	114	-1.08	0.28	0.501
Arhgap21	ENSMUSG00000036591	32	-1.08	0.281	0.501
Atf4	ENSMUSG00000042406	113	-1.08	0.279	0.501
Ybx3	ENSMUSG00000030189	127	-1.09	0.274	0.496
Blvrb	ENSMUSG00000040466	111	-1.09	0.274	0.496
Smarcc2	ENSMUSG00000025369	122	-1.09	0.277	0.5
Rac3	ENSMUSG00000018012	134	-1.1	0.272	0.493
Pura	ENSMUSG00000043991	114	-1.1	0.272	0.494
Rgs16	ENSMUSG00000026475	147	-1.1	0.273	0.496
Slc50a1	ENSMUSG00000027953	117	-1.11	0.268	0.49
Cd320	ENSMUSG00000002308	114	-1.12	0.261	0.484
Ly6e	ENSMUSG00000022587	128	-1.12	0.261	0.484
Zc3hav1	ENSMUSG00000029826	115	-1.13	0.258	0.481
Zfp36	ENSMUSG00000044786	209	-1.14	0.253	0.476
Heg1	ENSMUSG00000075254	117	-1.14	0.253	0.476
Gria3	ENSMUSG00000001986	135	-1.16	0.245	0.467
[truncated: 325 more rows]

## Sheet: MRs_mouse_myCAFs
mgi_symbol	Regulon	Size	NES	p.value	FDR
Cd53	ENSMUSG00000040747	33	6.73	1.74e-11	4.05e-08
Cntfr	ENSMUSG00000028444	74	5.93	2.94e-09	3.42e-06
Tmeff1	ENSMUSG00000028347	52	5.45	4.95e-08	2.47e-05
Bcr	ENSMUSG00000009681	102	5.41	6.39e-08	2.47e-05
Cdkn2a	ENSMUSG00000044303	130	5.32	1.02e-07	3.38e-05
Zfp469	ENSMUSG00000043903	90	5.29	1.2e-07	3.43e-05
Dio3	ENSMUSG00000075707	82	5.27	1.33e-07	3.43e-05
Pdia6	ENSMUSG00000020571	168	5.23	1.68e-07	3.9e-05
Ak1	ENSMUSG00000026817	116	5.16	2.54e-07	5.36e-05
Arl4c	ENSMUSG00000049866	118	5.01	5.49e-07	0.000106
F2r	ENSMUSG00000048376	128	4.82	1.46e-06	0.000242
Bhlhe41	ENSMUSG00000030256	71	4.76	1.91e-06	0.000272
Cd63	ENSMUSG00000025351	144	4.75	2.03e-06	0.000272
Gpc1	ENSMUSG00000034220	120	4.75	2.04e-06	0.000272
Fhl2	ENSMUSG00000008136	138	4.73	2.29e-06	0.000272
Epha3	ENSMUSG00000052504	140	4.73	2.26e-06	0.000272
Ank	ENSMUSG00000022265	153	4.72	2.34e-06	0.000272
Pdgfrb	ENSMUSG00000024620	139	4.63	3.63e-06	0.000401
Emp1	ENSMUSG00000030208	112	4.54	5.72e-06	0.000563
Myo1b	ENSMUSG00000018417	128	4.51	6.45e-06	0.000563
Enpp1	ENSMUSG00000037370	139	4.51	6.6e-06	0.000563
Fap	ENSMUSG00000000392	133	4.5	6.88e-06	0.000563
Cd59a	ENSMUSG00000032679	144	4.5	6.83e-06	0.000563
Heyl	ENSMUSG00000032744	58	4.5	6.79e-06	0.000563
Runx2	ENSMUSG00000039153	138	4.49	7.03e-06	0.000563
Ecscr	ENSMUSG00000073599	121	4.48	7.4e-06	0.000573
Rgs16	ENSMUSG00000026475	147	4.42	9.91e-06	0.000743
Pth1r	ENSMUSG00000032492	136	4.4	1.07e-05	0.000752
Marcksl1	ENSMUSG00000047945	124	4.37	1.24e-05	0.000756
Inhba	ENSMUSG00000041324	175	4.34	1.43e-05	0.000812
Foxs1	ENSMUSG00000074676	59	4.34	1.41e-05	0.000812
Etv4	ENSMUSG00000017724	141	4.3	1.72e-05	0.000871
Myo10	ENSMUSG00000022272	108	4.3	1.72e-05	0.000871
Sema7a	ENSMUSG00000038264	36	4.3	1.71e-05	0.000871
Thy1	ENSMUSG00000032011	117	4.22	2.39e-05	0.00116
Nkd2	ENSMUSG00000021567	152	4.17	3.07e-05	0.00143
Cx3cl1	ENSMUSG00000031778	62	4.17	3.07e-05	0.00143
Aqp1	ENSMUSG00000004655	60	4.1	4.15e-05	0.00189
Slc7a5	ENSMUSG00000040010	135	4.06	4.92e-05	0.00208
B4galnt1	ENSMUSG00000006731	142	4.05	5.04e-05	0.00209
Kcnma1	ENSMUSG00000063142	60	4	6.4e-05	0.00252
Pdia3	ENSMUSG00000027248	157	3.99	6.59e-05	0.00255
Avpr1a	ENSMUSG00000020123	42	3.98	6.81e-05	0.00259
Slc6a6	ENSMUSG00000030096	127	3.94	8.09e-05	0.00303
Hoxb8	ENSMUSG00000056648	31	3.93	8.39e-05	0.00309
Itgb1	ENSMUSG00000025809	123	3.92	8.87e-05	0.00321
Eng	ENSMUSG00000026814	125	3.92	8.98e-05	0.00321
Ncam1	ENSMUSG00000039542	150	3.89	0.000102	0.00331
Msx1	ENSMUSG00000048450	157	3.89	0.000102	0.00331
Arf4	ENSMUSG00000021877	114	3.88	0.000103	0.00331
Zmat3	ENSMUSG00000027663	112	3.88	0.000107	0.00338
Tes	ENSMUSG00000029552	128	3.87	0.000109	0.00338
Fzd1	ENSMUSG00000044674	118	3.87	0.000111	0.00338
Mafb	ENSMUSG00000074622	58	3.87	0.000108	0.00338
Twist2	ENSMUSG00000007805	48	3.86	0.000112	0.00338
Snai1	ENSMUSG00000042821	126	3.86	0.000113	0.00338
Sfrp1	ENSMUSG00000031548	219	3.85	0.000116	0.00342
Pard6g	ENSMUSG00000056214	96	3.85	0.00012	0.00345
Tgfb3	ENSMUSG00000021253	115	3.83	0.000126	0.00356
Phlda3	ENSMUSG00000041801	113	3.81	0.000138	0.00387
Cdc42ep3	ENSMUSG00000036533	125	3.81	0.000142	0.00392
Ednra	ENSMUSG00000031616	125	3.79	0.000149	0.00402
Wnt2	ENSMUSG00000010797	137	3.76	0.000168	0.00439
Fxyd6	ENSMUSG00000066705	127	3.76	0.000172	0.00445
Slc7a2	ENSMUSG00000031596	140	3.75	0.000177	0.00447
Adcy7	ENSMUSG00000031659	141	3.74	0.000186	0.00447
Des	ENSMUSG00000026208	117	3.73	0.000189	0.00447
Nr1d1	ENSMUSG00000020889	133	3.72	0.000196	0.00457
Etv6	ENSMUSG00000030199	130	3.7	0.000213	0.00486
Grasp	ENSMUSG00000000531	155	3.68	0.000231	0.00507
Ttyh3	ENSMUSG00000036565	131	3.67	0.000238	0.00512
Rab8a	ENSMUSG00000003037	112	3.66	0.000255	0.00533
Cd9	ENSMUSG00000030342	120	3.66	0.000255	0.00533
Rgs2	ENSMUSG00000026360	73	3.61	0.000302	0.006
Hoxd8	ENSMUSG00000027102	26	3.61	0.000301	0.006
Tead2	ENSMUSG00000030796	134	3.61	0.000307	0.00604
Tgfb1	ENSMUSG00000002603	113	3.59	0.000331	0.00647
Pdgfc	ENSMUSG00000028019	155	3.58	0.000341	0.00661
Cdh11	ENSMUSG00000031673	117	3.57	0.000358	0.00687
Fgd5	ENSMUSG00000034037	47	3.52	0.000427	0.00807
Panx1	ENSMUSG00000031934	118	3.52	0.000434	0.00814
Itgb3	ENSMUSG00000020689	34	3.51	0.000451	0.00831
Slc39a6	ENSMUSG00000024270	117	3.51	0.000448	0.00831
Stra6	ENSMUSG00000032327	74	3.51	0.000454	0.00831
Tanc1	ENSMUSG00000035168	127	3.49	0.000485	0.00875
Slc20a1	ENSMUSG00000027397	139	3.42	0.000623	0.0109
Mmp14	ENSMUSG00000000957	126	3.41	0.00066	0.0112
Ybx1	ENSMUSG00000028639	133	3.41	0.000651	0.0112
Ramp1	ENSMUSG00000034353	69	3.4	0.000672	0.0112
Jag1	ENSMUSG00000027276	104	3.35	0.000809	0.0131
Gria3	ENSMUSG00000001986	135	3.34	0.00083	0.0134
Smarca4	ENSMUSG00000032187	112	3.27	0.00108	0.0163
Vmp1	ENSMUSG00000018171	113	3.25	0.00116	0.0174
Hoxb6	ENSMUSG00000000690	70	3.24	0.00118	0.0174
Pacsin3	ENSMUSG00000027257	130	3.24	0.00119	0.0174
Ephb2	ENSMUSG00000028664	155	3.24	0.00121	0.0175
Tspan14	ENSMUSG00000037824	54	3.24	0.00121	0.0175
Crabp2	ENSMUSG00000004885	76	3.23	0.00123	0.0175
Dbp	ENSMUSG00000059824	32	3.22	0.00127	0.0179
Elk3	ENSMUSG00000008398	119	3.22	0.00129	0.018
Ldlr	ENSMUSG00000032193	81	3.21	0.00132	0.0181
Rab15	ENSMUSG00000021062	90	3.2	0.00135	0.0185
Vstm4	ENSMUSG00000050666	145	3.16	0.0016	0.0215
Hspa5	ENSMUSG00000026864	190	3.15	0.00164	0.022
Arf5	ENSMUSG00000020440	122	3.13	0.00173	0.0228
Ap2m1	ENSMUSG00000022841	116	3.11	0.00184	0.0238
Pak1	ENSMUSG00000030774	117	3.1	0.00194	0.0246
Adgre5	ENSMUSG00000002885	136	3.09	0.00203	0.0253
Rusc1	ENSMUSG00000041263	123	3.08	0.00205	0.0253
Tln2	ENSMUSG00000052698	121	3.07	0.00217	0.0267
Mitf	ENSMUSG00000035158	77	3.06	0.00219	0.0268
Slc19a1	ENSMUSG00000001436	125	3.06	0.00224	0.0273
Hivep3	ENSMUSG00000028634	153	3.03	0.00247	0.0296
Hoxc10	ENSMUSG00000022484	54	3.02	0.00253	0.0298
Tspan4	ENSMUSG00000025511	111	3.02	0.00252	0.0298
Rftn2	ENSMUSG00000025978	65	3.02	0.00254	0.0298
Epb41l3	ENSMUSG00000024044	118	3.01	0.00265	0.0308
Stk17b	ENSMUSG00000026094	136	2.99	0.0028	0.0323
Piezo2	ENSMUSG00000041482	122	2.98	0.00292	0.0333
Tnfrsf23	ENSMUSG00000037613	136	2.95	0.00313	0.0352
Npc1	ENSMUSG00000024413	90	2.94	0.0033	0.0367
Actl6a	ENSMUSG00000027671	114	2.9	0.00367	0.0395
Calr	ENSMUSG00000003814	158	2.89	0.00383	0.0408
Gnas	ENSMUSG00000027523	116	2.89	0.00385	0.0408
Cfl1	ENSMUSG00000056201	151	2.87	0.00407	0.0426
Marveld1	ENSMUSG00000044345	124	2.86	0.00419	0.0431
Fiz1	ENSMUSG00000061374	129	2.86	0.00419	0.0431
Maged1	ENSMUSG00000025151	113	2.85	0.00433	0.0442
Gmcl1	ENSMUSG00000001157	119	2.84	0.00446	0.0452
Tmem47	ENSMUSG00000025666	129	2.83	0.00462	0.0465
Calm3	ENSMUSG00000019370	115	2.81	0.00496	0.0493
Jund	ENSMUSG00000071076	351	2.8	0.00504	0.0499
Nfxl1	ENSMUSG00000072889	122	2.79	0.00524	0.0514
Atp5b	ENSMUSG00000025393	127	2.78	0.00543	0.0528
Fndc4	ENSMUSG00000038552	126	2.78	0.00545	0.0528
Rhoa	ENSMUSG00000007815	118	2.76	0.00572	0.055
Morf4l2	ENSMUSG00000031422	116	2.75	0.00587	0.0562
Mmp2	ENSMUSG00000031740	175	2.75	0.00593	0.0563
Gng11	ENSMUSG00000032766	111	2.75	0.00597	0.0564
Dlst	ENSMUSG00000004789	117	2.74	0.00611	0.0572
Tmed10	ENSMUSG00000021248	118	2.74	0.00613	0.0572
Anxa5	ENSMUSG00000027712	121	2.74	0.0061	0.0572
Sox4	ENSMUSG00000076431	116	2.73	0.00638	0.059
Ror2	ENSMUSG00000021464	137	2.72	0.00647	0.0592
Tef	ENSMUSG00000022389	54	2.71	0.00676	0.061
Lrrc8a	ENSMUSG00000007476	126	2.7	0.00703	0.0628
Cdc42	ENSMUSG00000006699	113	2.69	0.00721	0.0642
Myh9	ENSMUSG00000022443	110	2.68	0.00734	0.0649
Pias3	ENSMUSG00000028101	145	2.68	0.00737	0.0649
Furin	ENSMUSG00000030530	113	2.66	0.00773	0.0673
Ctbp1	ENSMUSG00000037373	111	2.65	0.00794	0.0686
Pcbd1	ENSMUSG00000020098	65	2.65	0.00804	0.0692
Vegfa	ENSMUSG00000023951	132	2.65	0.00815	0.0696
Pknox2	ENSMUSG00000035934	37	2.64	0.00819	0.0696
Plp2	ENSMUSG00000031146	111	2.64	0.00838	0.0705
Lbh	ENSMUSG00000024063	111	2.63	0.00849	0.071
Mpzl2	ENSMUSG00000032092	71	2.6	0.0094	0.0775
Pkd1	ENSMUSG00000032855	159	2.59	0.00948	0.0778
Rab40c	ENSMUSG00000025730	148	2.59	0.00955	0.0782
Prr7	ENSMUSG00000034686	132	2.58	0.00984	0.08
Yipf4	ENSMUSG00000024072	115	2.58	0.00995	0.0803
Gabbr1	ENSMUSG00000024462	84	2.58	0.00991	0.0803
Bace1	ENSMUSG00000032086	125	2.58	0.01	0.0805
Epha4	ENSMUSG00000026235	69	2.57	0.0102	0.0814
Arpc2	ENSMUSG00000006304	118	2.55	0.0107	0.084
Tnfrsf12a	ENSMUSG00000023905	111	2.55	0.0108	0.0841
Creb3l1	ENSMUSG00000027230	110	2.55	0.0109	0.0844
Arf1	ENSMUSG00000048076	112	2.55	0.0109	0.0844
Brms1l	ENSMUSG00000012076	138	2.54	0.011	0.0844
Yaf2	ENSMUSG00000022634	115	2.54	0.011	0.0844
Hip1	ENSMUSG00000039959	134	2.53	0.0114	0.0868
Prdx2	ENSMUSG00000005161	118	2.52	0.0117	0.0882
Tpbg	ENSMUSG00000035274	116	2.52	0.0119	0.0897
Bcar1	ENSMUSG00000031955	132	2.51	0.012	0.09
Ets1	ENSMUSG00000032035	129	2.51	0.0121	0.0904
Gnaq	ENSMUSG00000024639	122	2.5	0.0123	0.0914
Peg3	ENSMUSG00000002265	37	2.49	0.0128	0.0938
Phldb2	ENSMUSG00000033149	114	2.49	0.0128	0.0938
Surf2	ENSMUSG00000014873	160	2.49	0.0129	0.094
Mrap	ENSMUSG00000039956	90	2.48	0.0131	0.0948
Src	ENSMUSG00000027646	123	2.47	0.0136	0.0975
Bsg	ENSMUSG00000023175	135	2.47	0.0136	0.0977
Pcgf2	ENSMUSG00000018537	112	2.46	0.0138	0.0978
Fubp3	ENSMUSG00000026843	126	2.46	0.0137	0.0978
Zfc3h1	ENSMUSG00000034163	133	2.46	0.0137	0.0978
P4hb	ENSMUSG00000025130	113	2.46	0.014	0.0993
Ppp2ca	ENSMUSG00000020349	114	2.45	0.0143	0.1
Pi4k2a	ENSMUSG00000025178	147	2.44	0.0146	0.102
2019-09-07	ENSMUSG00000001833	114	2.44	0.0148	0.103
Atp5o	ENSMUSG00000022956	116	2.43	0.0152	0.105
Gpr153	ENSMUSG00000042804	119	2.43	0.0153	0.105
Thap11	ENSMUSG00000036442	116	2.42	0.0157	0.107
Map1b	ENSMUSG00000052727	110	2.42	0.0157	0.108
Zfp580	ENSMUSG00000055633	169	2.41	0.0159	0.108
Plaur	ENSMUSG00000046223	113	2.41	0.016	0.109
Creb3	ENSMUSG00000028466	126	2.39	0.0166	0.112
Foxp4	ENSMUSG00000023991	119	2.39	0.0168	0.113
Flna	ENSMUSG00000031328	114	2.39	0.0168	0.113
Pkm	ENSMUSG00000032294	207	2.39	0.0169	0.113
Slc39a14	ENSMUSG00000022094	117	2.38	0.0171	0.114
Bhlhe40	ENSMUSG00000030103	111	2.38	0.0171	0.114
Gjc1	ENSMUSG00000034520	96	2.38	0.0173	0.114
Baz1a	ENSMUSG00000035021	113	2.38	0.0174	0.114
H13	ENSMUSG00000019188	116	2.37	0.0177	0.115
Necap1	ENSMUSG00000030327	155	2.37	0.0178	0.115
Slit2	ENSMUSG00000031558	123	2.37	0.0177	0.115
Rab3a	ENSMUSG00000031840	152	2.37	0.0176	0.115
Rrn3	ENSMUSG00000022682	155	2.37	0.018	0.116
Hsp90b1	ENSMUSG00000020048	172	2.36	0.0183	0.117
Prkar1a	ENSMUSG00000020612	126	2.36	0.0183	0.117
Clns1a	ENSMUSG00000025439	112	2.36	0.0182	0.117
Trim28	ENSMUSG00000005566	109	2.35	0.0189	0.119
Rhoc	ENSMUSG00000002233	123	2.34	0.0191	0.119
Prdx3	ENSMUSG00000024997	112	2.34	0.0192	0.119
Cnbp	ENSMUSG00000030057	122	2.33	0.0198	0.123
Msn	ENSMUSG00000031207	116	2.32	0.0206	0.127
Irak2	ENSMUSG00000060477	126	2.31	0.0209	0.128
Hes1	ENSMUSG00000022528	113	2.3	0.0213	0.129
Nrbf2	ENSMUSG00000075000	117	2.3	0.0212	0.129
Traf4	ENSMUSG00000017386	124	2.29	0.0218	0.133
Gpsm1	ENSMUSG00000026930	98	2.29	0.022	0.133
Eloc	ENSMUSG00000079658	111	2.29	0.0222	0.134
Sulf1	ENSMUSG00000016918	111	2.28	0.0228	0.137
Vps4a	ENSMUSG00000031913	119	2.27	0.0233	0.139
Taf6	ENSMUSG00000036980	114	2.27	0.0232	0.139
Palld	ENSMUSG00000058056	116	2.27	0.0233	0.139
Cers2	ENSMUSG00000015714	114	2.26	0.0237	0.141
Strap	ENSMUSG00000030224	111	2.26	0.0237	0.141
Ptk7	ENSMUSG00000023972	117	2.26	0.024	0.142
Actn1	ENSMUSG00000015143	109	2.25	0.0246	0.144
Coro1c	ENSMUSG00000004530	116	2.24	0.025	0.146
Slc16a3	ENSMUSG00000025161	190	2.23	0.0255	0.148
P3h1	ENSMUSG00000028641	114	2.23	0.0257	0.148
Ilk	ENSMUSG00000030890	114	2.23	0.0256	0.148
Emsy	ENSMUSG00000035401	120	2.23	0.0256	0.148
Fnbp1l	ENSMUSG00000039735	39	2.23	0.0258	0.148
Rdx	ENSMUSG00000032050	113	2.22	0.0262	0.15
Arhgap1	ENSMUSG00000027247	116	2.21	0.0271	0.153
Rab22a	ENSMUSG00000027519	113	2.21	0.027	0.153
Fubp1	ENSMUSG00000028034	112	2.21	0.0268	0.153
Calm2	ENSMUSG00000036438	123	2.21	0.0269	0.153
Tcaf1	ENSMUSG00000036667	131	2.21	0.0271	0.153
Pvr	ENSMUSG00000040511	117	2.21	0.0274	0.155
Rasa2	ENSMUSG00000032413	97	2.2	0.0275	0.155
Morf4l1	ENSMUSG00000062270	125	2.2	0.0277	0.156
Clmp	ENSMUSG00000032024	111	2.19	0.0284	0.159
Creb3l2	ENSMUSG00000038648	115	2.19	0.0284	0.159
Dstyk	ENSMUSG00000042046	83	2.17	0.0297	0.165
Camta1	ENSMUSG00000014592	114	2.15	0.0316	0.173
Maea	ENSMUSG00000079562	109	2.15	0.0317	0.173
Sra1	ENSMUSG00000006050	116	2.14	0.0324	0.176
Hint1	ENSMUSG00000020267	123	2.14	0.0326	0.176
Vapa	ENSMUSG00000024091	112	2.14	0.0323	0.176
Fam129b	ENSMUSG00000026796	113	2.14	0.0325	0.176
Ckap4	ENSMUSG00000046841	112	2.14	0.0325	0.176
Lrrfip1	ENSMUSG00000026305	114	2.13	0.0331	0.177
Parva	ENSMUSG00000030770	113	2.13	0.0328	0.177
Crlf2	ENSMUSG00000033467	113	2.13	0.0331	0.177
Ntrk1	ENSMUSG00000028072	159	2.13	0.0335	0.178
Ttyh2	ENSMUSG00000034714	135	2.13	0.0336	0.178
Pml	ENSMUSG00000036986	74	2.13	0.0333	0.178
Calm1	ENSMUSG00000001175	123	2.12	0.0338	0.179
Nfatc4	ENSMUSG00000023411	130	2.12	0.034	0.179
Necap2	ENSMUSG00000028923	114	2.12	0.0342	0.179
Fermt2	ENSMUSG00000037712	113	2.12	0.0342	0.179
Atp6v0a2	ENSMUSG00000038023	115	2.12	0.0337	0.179
Hdgf	ENSMUSG00000004897	112	2.11	0.0348	0.181
Gtf2ird1	ENSMUSG00000023079	118	2.11	0.0349	0.181
Laptm4a	ENSMUSG00000020585	131	2.09	0.0364	0.187
Cdk14	ENSMUSG00000028926	143	2.09	0.0365	0.187
Egr2	ENSMUSG00000037868	119	2.09	0.0369	0.187
Smurf1	ENSMUSG00000038780	43	2.09	0.0368	0.187
Jun	ENSMUSG00000052684	478	2.09	0.0367	0.187
Ralb	ENSMUSG00000004451	117	2.08	0.0373	0.189
Lrig3	ENSMUSG00000020105	149	2.08	0.0376	0.19
Slc3a2	ENSMUSG00000010095	112	2.08	0.0378	0.191
Gbf1	ENSMUSG00000025224	121	2.06	0.0391	0.197
Rgs19	ENSMUSG00000002458	113	2.06	0.0396	0.199
Tbxa2r	ENSMUSG00000034881	53	2.06	0.0398	0.199
Atxn10	ENSMUSG00000016541	114	2.05	0.04	0.199
Ptges2	ENSMUSG00000026820	115	2.05	0.0403	0.2
Tsc22d4	ENSMUSG00000029723	112	2.05	0.0402	0.2
Rab18	ENSMUSG00000073639	114	2.04	0.0415	0.204
Itga5	ENSMUSG00000000555	113	2.03	0.0419	0.205
Yy1	ENSMUSG00000021264	111	2.03	0.042	0.205
Nradd	ENSMUSG00000032491	112	2.03	0.0419	0.205
Rchy1	ENSMUSG00000029397	110	2.03	0.0425	0.207
Gapdh	ENSMUSG00000057666	251	2.02	0.0434	0.211
Slco2a1	ENSMUSG00000032548	68	2.02	0.0438	0.212
Hoxb2	ENSMUSG00000075588	114	2.01	0.044	0.212
Dnm2	ENSMUSG00000033335	114	2.01	0.0443	0.213
Hoxb4	ENSMUSG00000038692	77	2.01	0.0443	0.213
Dlg1	ENSMUSG00000022770	144	2.01	0.0448	0.214
Tcf4	ENSMUSG00000053477	114	2.01	0.0445	0.214
Tceal8	ENSMUSG00000051579	113	2	0.0455	0.217
Ryk	ENSMUSG00000032547	110	2	0.0458	0.218
Ywhab	ENSMUSG00000018326	119	1.99	0.0463	0.22
Zfp9	ENSMUSG00000072623	127	1.99	0.0465	0.22
Eaf1	ENSMUSG00000021890	139	1.98	0.0476	0.224
Mdh2	ENSMUSG00000019179	114	1.98	0.0482	0.225
Atp5a1	ENSMUSG00000025428	117	1.98	0.0479	0.225
Stub1	ENSMUSG00000039615	124	1.98	0.0481	0.225
Snf8	ENSMUSG00000006058	117	1.97	0.0488	0.227
Il4ra	ENSMUSG00000030748	117	1.97	0.0487	0.227
Rcc2	ENSMUSG00000040945	113	1.97	0.0491	0.227
Ubc	ENSMUSG00000008348	170	1.96	0.0495	0.228
Mien1	ENSMUSG00000002580	110	1.96	0.0503	0.229
Rassf1	ENSMUSG00000010067	113	1.96	0.0503	0.229
Plscr3	ENSMUSG00000019461	108	1.96	0.0501	0.229
Nmt1	ENSMUSG00000020936	112	1.96	0.0501	0.229
Atf6	ENSMUSG00000026663	127	1.96	0.0501	0.229
Psmd9	ENSMUSG00000029440	116	1.96	0.0504	0.229
Cdc42ep4	ENSMUSG00000041598	148	1.95	0.0517	0.234
Plekha1	ENSMUSG00000040268	128	1.94	0.0529	0.239
Tmf1	ENSMUSG00000030059	116	1.93	0.053	0.239
Ap2s1	ENSMUSG00000008036	111	1.93	0.0542	0.242
Fzd2	ENSMUSG00000050288	115	1.93	0.054	0.242
Nfyc	ENSMUSG00000032897	116	1.92	0.0544	0.242
Zdhhc9	ENSMUSG00000036985	91	1.92	0.0543	0.242
Mdfic	ENSMUSG00000041390	117	1.92	0.0544	0.242
Map2k1	ENSMUSG00000004936	113	1.92	0.055	0.243
Cdk2	ENSMUSG00000025358	164	1.92	0.0546	0.243
Acvr1	ENSMUSG00000026836	137	1.92	0.0552	0.243
Adgra3	ENSMUSG00000029090	127	1.92	0.0552	0.243
Foxp1	ENSMUSG00000030067	114	1.92	0.0547	0.243
Gna11	ENSMUSG00000034781	111	1.92	0.0551	0.243
Hdac2	ENSMUSG00000019777	111	1.91	0.0558	0.244
Tmx1	ENSMUSG00000021072	111	1.91	0.0557	0.244
Esrra	ENSMUSG00000024955	125	1.91	0.0564	0.246
Znhit6	ENSMUSG00000074182	122	1.91	0.0562	0.246
Wdr77	ENSMUSG00000000561	116	1.9	0.0573	0.248
Zc3h14	ENSMUSG00000021012	111	1.9	0.057	0.248
Eif5	ENSMUSG00000021282	113	1.9	0.0573	0.248
Zrsr2	ENSMUSG00000031370	114	1.9	0.0569	0.248
Grk6	ENSMUSG00000074886	119	1.9	0.0575	0.248
Hnrnpd	ENSMUSG00000000568	116	1.89	0.0582	0.251
Cdv3	ENSMUSG00000032803	113	1.89	0.0583	0.251
Srf	ENSMUSG00000015605	117	1.89	0.0588	0.252
Rcbtb1	ENSMUSG00000035469	148	1.89	0.0587	0.252
Preb	ENSMUSG00000045302	124	1.89	0.059	0.252
Commd7	ENSMUSG00000056941	109	1.88	0.0596	0.254
Sphk1	ENSMUSG00000061878	126	1.88	0.0597	0.254
Ube2d3	ENSMUSG00000078578	123	1.88	0.06	0.255
Ccdc124	ENSMUSG00000007721	111	1.88	0.0601	0.256
Stx7	ENSMUSG00000019998	113	1.88	0.0606	0.256
Csk	ENSMUSG00000032312	113	1.88	0.0607	0.256
Mapre3	ENSMUSG00000029166	146	1.87	0.061	0.257
Vasp	ENSMUSG00000030403	113	1.87	0.061	0.257
Wwtr1	ENSMUSG00000027803	110	1.87	0.062	0.259
Ncor2	ENSMUSG00000029478	117	1.87	0.062	0.259
Prdm5	ENSMUSG00000029913	142	1.87	0.062	0.259
Prkacb	ENSMUSG00000005034	117	1.86	0.0626	0.259
Tsg101	ENSMUSG00000014402	111	1.86	0.063	0.259
Zdhhc20	ENSMUSG00000021969	109	1.86	0.063	0.259
Lamtor1	ENSMUSG00000030842	112	1.86	0.0628	0.259
Gpc4	ENSMUSG00000031119	130	1.86	0.0625	0.259
Got2	ENSMUSG00000031672	110	1.86	0.0629	0.259
Zfp322a	ENSMUSG00000046351	137	1.86	0.0629	0.259
Smarcb1	ENSMUSG00000000902	111	1.86	0.0635	0.26
Slc31a1	ENSMUSG00000066150	112	1.86	0.0634	0.26
Hmox2	ENSMUSG00000004070	114	1.85	0.0638	0.26
Uba3	ENSMUSG00000030061	121	1.85	0.064	0.26
Ankrd13a	ENSMUSG00000041870	123	1.85	0.0639	0.26
Siva1	ENSMUSG00000064326	112	1.85	0.0643	0.261
Jup	ENSMUSG00000001552	129	1.85	0.065	0.262
Rac3	ENSMUSG00000018012	134	1.85	0.0649	0.262
Slc11a2	ENSMUSG00000023030	132	1.85	0.0645	0.262
Rhod	ENSMUSG00000041845	123	1.85	0.0649	0.262
Ncstn	ENSMUSG00000003458	116	1.84	0.0656	0.262
Cd44	ENSMUSG00000005087	120	1.84	0.0658	0.262
Tjap1	ENSMUSG00000012296	120	1.84	0.0653	0.262
Tmem97	ENSMUSG00000037278	114	1.84	0.0656	0.262
Hoxb7	ENSMUSG00000038721	118	1.84	0.0658	0.262
Ube2n	ENSMUSG00000074781	112	1.84	0.0653	0.262
Rnf2	ENSMUSG00000026484	114	1.84	0.0662	0.263
Ptpn1	ENSMUSG00000027540	118	1.84	0.0661	0.263
Prnp	ENSMUSG00000079037	119	1.84	0.066	0.263
Pyurf	ENSMUSG00000043162	113	1.83	0.0665	0.263
S1pr3	ENSMUSG00000067586	84	1.83	0.0666	0.263
Rtn4	ENSMUSG00000020458	114	1.83	0.0674	0.264
Mtdh	ENSMUSG00000022255	114	1.83	0.067	0.264
Enah	ENSMUSG00000022995	118	1.83	0.0673	0.264
Orc2	ENSMUSG00000026037	127	1.83	0.0672	0.264
Hcfc1	ENSMUSG00000031386	112	1.83	0.0675	0.264
Tmem59	ENSMUSG00000028618	116	1.83	0.0679	0.265
Ctnnb1	ENSMUSG00000006932	110	1.82	0.0684	0.267
Ephb3	ENSMUSG00000005958	163	1.82	0.0693	0.268
Piezo1	ENSMUSG00000014444	140	1.82	0.0688	0.268
Tjp1	ENSMUSG00000030516	126	1.82	0.069	0.268
Nr2f2	ENSMUSG00000030551	115	1.82	0.0694	0.268
Zfp560	ENSMUSG00000045519	114	1.82	0.0691	0.268
Jmjd6	ENSMUSG00000056962	120	1.82	0.0693	0.268
Rala	ENSMUSG00000008859	112	1.81	0.0699	0.269
Ehd1	ENSMUSG00000024772	118	1.81	0.07	0.269
Ubac1	ENSMUSG00000036352	113	1.81	0.07	0.269
Gng12	ENSMUSG00000036402	115	1.81	0.0701	0.269
Casp8ap2	ENSMUSG00000028282	148	1.81	0.071	0.271
Srsf2	ENSMUSG00000034120	117	1.81	0.0709	0.271
Crcp	ENSMUSG00000025532	136	1.8	0.0712	0.271
Vcl	ENSMUSG00000021823	122	1.8	0.0725	0.274
Mbd3	ENSMUSG00000035478	111	1.8	0.072	0.274
Adrm1	ENSMUSG00000039041	109	1.8	0.0722	0.274
Smad2	ENSMUSG00000024563	119	1.79	0.0731	0.276
Psma4	ENSMUSG00000032301	118	1.79	0.0734	0.276
Tsc22d3	ENSMUSG00000031431	120	1.79	0.0736	0.277
Zpr1	ENSMUSG00000032078	119	1.79	0.0737	0.277
Sarnp	ENSMUSG00000078427	121	1.79	0.0741	0.278
Adss	ENSMUSG00000015961	117	1.78	0.0752	0.278
Golph3	ENSMUSG00000022200	110	1.78	0.075	0.278
Ifngr2	ENSMUSG00000022965	113	1.78	0.0752	0.278
Sufu	ENSMUSG00000025231	116	1.78	0.075	0.278
Eif2b1	ENSMUSG00000029388	113	1.78	0.0745	0.278
Copb1	ENSMUSG00000030754	109	1.78	0.0751	0.278
Sap30	ENSMUSG00000031609	118	1.78	0.075	0.278
Zfp821	ENSMUSG00000031728	27	1.78	0.0753	0.278
Vezt	ENSMUSG00000036099	145	1.78	0.0757	0.278
Rnf10	ENSMUSG00000041740	119	1.78	0.0757	0.278
Suclg1	ENSMUSG00000052738	115	1.78	0.0759	0.278
Usf2	ENSMUSG00000058239	114	1.78	0.0753	0.278
Ap2a1	ENSMUSG00000060279	122	1.78	0.0749	0.278
Bmi1	ENSMUSG00000026739	130	1.77	0.076	0.278
Tgfb1i1	ENSMUSG00000030782	115	1.77	0.0763	0.278
Slc41a2	ENSMUSG00000034591	35	1.77	0.076	0.278
Hic1	ENSMUSG00000043099	128	1.77	0.0765	0.278
Xbp1	ENSMUSG00000020484	120	1.77	0.0767	0.279
Hnrnpdl	ENSMUSG00000029328	114	1.76	0.0781	0.283
Pbx2	ENSMUSG00000034673	133	1.76	0.0784	0.283
Zfyve27	ENSMUSG00000018820	135	1.76	0.0791	0.285
Nrf1	ENSMUSG00000058440	150	1.76	0.0789	0.285
Nelfe	ENSMUSG00000024369	120	1.75	0.0794	0.285
Sigmar1	ENSMUSG00000036078	114	1.75	0.0809	0.289
Srp72	ENSMUSG00000036323	118	1.75	0.0806	0.289
Exoc1	ENSMUSG00000036435	134	1.75	0.0808	0.289
Ppard	ENSMUSG00000002250	143	1.74	0.0812	0.289
Trim27	ENSMUSG00000021326	111	1.74	0.0812	0.289
Capn2	ENSMUSG00000026509	111	1.74	0.0815	0.289
Atp2c1	ENSMUSG00000032570	113	1.74	0.0822	0.291
Med25	ENSMUSG00000002968	112	1.74	0.0827	0.292
Scmh1	ENSMUSG00000000085	125	1.73	0.0835	0.293
Gatad2a	ENSMUSG00000036180	117	1.73	0.0837	0.294
Zkscan3	ENSMUSG00000021327	121	1.72	0.0849	0.296
Tln1	ENSMUSG00000028465	121	1.72	0.0853	0.296
Zxdc	ENSMUSG00000034430	90	1.72	0.0847	0.296
1810055G02Rik	ENSMUSG00000035372	113	1.72	0.0845	0.296
Ppp1ca	ENSMUSG00000040385	115	1.72	0.0853	0.296
Ecsit	ENSMUSG00000066839	127	1.72	0.0863	0.299
Tulp3	ENSMUSG00000001521	137	1.71	0.0867	0.3
Snx9	ENSMUSG00000002365	115	1.71	0.0873	0.301
Pttg1ip	ENSMUSG00000009291	112	1.71	0.0874	0.301
Lsp1	ENSMUSG00000018819	121	1.71	0.0871	0.301
Zdhhc16	ENSMUSG00000025157	111	1.71	0.0881	0.302
Nfkb2	ENSMUSG00000025225	111	1.71	0.0878	0.302
Pfn1	ENSMUSG00000018293	185	1.7	0.0889	0.302
Adipor1	ENSMUSG00000026457	114	1.7	0.0886	0.302
Tmed1	ENSMUSG00000032180	114	1.7	0.0888	0.302
Ddx50	ENSMUSG00000020076	110	1.7	0.0895	0.303
Ppp4c	ENSMUSG00000030697	116	1.7	0.0893	0.303
Efnb1	ENSMUSG00000031217	120	1.7	0.0897	0.303
Rfxap	ENSMUSG00000036615	117	1.7	0.0894	0.303
Snd1	ENSMUSG00000001424	115	1.69	0.0903	0.303
Snapc1	ENSMUSG00000021113	135	1.69	0.0903	0.303
Akt2	ENSMUSG00000004056	114	1.69	0.0907	0.304
Slc41a1	ENSMUSG00000013275	80	1.69	0.0912	0.305
Ppp3r1	ENSMUSG00000033953	109	1.69	0.0918	0.307
Akt1	ENSMUSG00000001729	112	1.68	0.0933	0.307
Snapc2	ENSMUSG00000011837	126	1.68	0.0938	0.307
Lims1	ENSMUSG00000019920	109	1.68	0.0927	0.307
Nr1d2	ENSMUSG00000021775	132	1.68	0.0935	0.307
Scyl1	ENSMUSG00000024941	114	1.68	0.0937	0.307
Meaf6	ENSMUSG00000028863	110	1.68	0.0939	0.307
Cbfb	ENSMUSG00000031885	113	1.68	0.0928	0.307
Pkig	ENSMUSG00000035268	113	1.68	0.0936	0.307
Trp53i13	ENSMUSG00000044328	117	1.68	0.0936	0.307
Phf5a	ENSMUSG00000061360	124	1.68	0.0929	0.307
Hmgcs1	ENSMUSG00000093930	122	1.68	0.0922	0.307
Zfp131	ENSMUSG00000094870	124	1.68	0.0929	0.307
Psmc3	ENSMUSG00000002102	112	1.67	0.0943	0.307
Srebf1	ENSMUSG00000020538	114	1.67	0.0949	0.307
Ripk3	ENSMUSG00000022221	114	1.67	0.0941	0.307
Abcc1	ENSMUSG00000023088	138	1.67	0.0947	0.307
Igf2r	ENSMUSG00000023830	123	1.67	0.0939	0.307
Rnf34	ENSMUSG00000029474	124	1.67	0.094	0.307
Cdipt	ENSMUSG00000030682	114	1.67	0.0946	0.307
Cttn	ENSMUSG00000031078	112	1.67	0.095	0.307
Mfsd5	ENSMUSG00000045665	116	1.67	0.095	0.307
Prkaca	ENSMUSG00000005469	113	1.66	0.0972	0.313
Deaf1	ENSMUSG00000058886	144	1.66	0.0975	0.313
Nsmf	ENSMUSG00000006476	130	1.65	0.0995	0.315
Cdk9	ENSMUSG00000009555	115	1.65	0.0997	0.315
Sap18	ENSMUSG00000021963	111	1.65	0.0998	0.315
Sirt7	ENSMUSG00000025138	128	1.65	0.0999	0.315
Hras	ENSMUSG00000025499	120	1.65	0.0991	0.315
Tcf12	ENSMUSG00000032228	115	1.65	0.0995	0.315
Zbed3	ENSMUSG00000041995	119	1.65	0.0992	0.315
Sympk	ENSMUSG00000023118	110	1.64	0.1	0.315
Dnajb6	ENSMUSG00000029131	112	1.64	0.1	0.315
Tdp2	ENSMUSG00000035958	113	1.64	0.101	0.315
Tsfm	ENSMUSG00000040521	115	1.64	0.1	0.315
Homer3	ENSMUSG00000003573	123	1.64	0.102	0.316
Serinc1	ENSMUSG00000019877	113	1.64	0.101	0.316
Pex14	ENSMUSG00000028975	117	1.64	0.101	0.316
Vopp1	ENSMUSG00000037788	106	1.64	0.102	0.316
Tgif1	ENSMUSG00000047407	113	1.64	0.102	0.316
Psmc5	ENSMUSG00000020708	114	1.63	0.103	0.318
Fads1	ENSMUSG00000010663	117	1.63	0.104	0.319
Pten	ENSMUSG00000013663	116	1.63	0.104	0.319
Cyth3	ENSMUSG00000018001	121	1.63	0.104	0.319
Zcchc10	ENSMUSG00000018239	115	1.63	0.104	0.319
Farp1	ENSMUSG00000025555	130	1.63	0.104	0.319
Ppp1r8	ENSMUSG00000028882	112	1.63	0.103	0.319
Gtf2e2	ENSMUSG00000031585	116	1.63	0.104	0.319
Rell1	ENSMUSG00000047881	129	1.63	0.103	0.319
Zcchc14	ENSMUSG00000061410	122	1.63	0.104	0.319
Sod2	ENSMUSG00000006818	113	1.62	0.104	0.319
E2f4	ENSMUSG00000014859	116	1.62	0.104	0.319
Max	ENSMUSG00000059436	115	1.62	0.104	0.319
Gatad1	ENSMUSG00000007415	109	1.62	0.105	0.32
Vav2	ENSMUSG00000009621	141	1.62	0.105	0.32
Chmp2b	ENSMUSG00000004843	111	1.62	0.105	0.321
Zfpl1	ENSMUSG00000024792	113	1.62	0.106	0.321
Csnk1d	ENSMUSG00000025162	116	1.62	0.106	0.321
Smap1	ENSMUSG00000026155	114	1.62	0.106	0.321
Mapkap1	ENSMUSG00000038696	114	1.62	0.106	0.321
Sertad3	ENSMUSG00000055200	137	1.62	0.106	0.321
Xpo6	ENSMUSG00000000131	137	1.61	0.106	0.321
Mical3	ENSMUSG00000051586	67	1.61	0.107	0.321
Znhit2	ENSMUSG00000075227	145	1.61	0.107	0.321
Kat5	ENSMUSG00000024926	124	1.61	0.108	0.322
Arfgap2	ENSMUSG00000027255	120	1.61	0.107	0.322
Htt	ENSMUSG00000029104	119	1.61	0.108	0.322
Klf16	ENSMUSG00000035397	130	1.61	0.108	0.322
Zfp768	ENSMUSG00000047371	134	1.61	0.108	0.322
Mafg	ENSMUSG00000051510	110	1.61	0.108	0.322
Rab5a	ENSMUSG00000017831	113	1.6	0.109	0.323
Csnk2b	ENSMUSG00000024387	110	1.6	0.109	0.323
Inppl1	ENSMUSG00000032737	117	1.6	0.109	0.323
Dbn1	ENSMUSG00000034675	116	1.6	0.109	0.323
Zfp512	ENSMUSG00000062761	148	1.6	0.109	0.324
Per1	ENSMUSG00000020893	140	1.6	0.11	0.325
Tfam	ENSMUSG00000003923	119	1.59	0.112	0.325
Nedd8	ENSMUSG00000010376	116	1.59	0.113	0.325
Wnt5a	ENSMUSG00000021994	120	1.59	0.111	0.325
Smarcc2	ENSMUSG00000025369	122	1.59	0.111	0.325
Sumo1	ENSMUSG00000026021	117	1.59	0.111	0.325
Nsfl1c	ENSMUSG00000027455	110	1.59	0.112	0.325
Skil	ENSMUSG00000027660	117	1.59	0.111	0.325
Slc2a1	ENSMUSG00000028645	114	1.59	0.111	0.325
Fscn1	ENSMUSG00000029581	111	1.59	0.113	0.325
Magee1	ENSMUSG00000031227	129	1.59	0.112	0.325
Cbl	ENSMUSG00000034342	110	1.59	0.111	0.325
Gpr176	ENSMUSG00000040133	51	1.59	0.112	0.325
Polr2k	ENSMUSG00000045996	113	1.59	0.112	0.325
Peak1	ENSMUSG00000074305	131	1.59	0.112	0.325
Zfp207	ENSMUSG00000017421	116	1.58	0.113	0.326
Ppp3ca	ENSMUSG00000028161	115	1.58	0.113	0.326
Kat7	ENSMUSG00000038909	144	1.58	0.113	0.326
Znhit3	ENSMUSG00000020526	136	1.58	0.114	0.327
Gnai2	ENSMUSG00000032562	119	1.58	0.114	0.327
Usp16	ENSMUSG00000025616	113	1.58	0.115	0.329
Hdac1	ENSMUSG00000028800	111	1.57	0.116	0.331
Gypc	ENSMUSG00000090523	146	1.57	0.116	0.331
G3bp1	ENSMUSG00000018583	110	1.57	0.116	0.332
Flnb	ENSMUSG00000025278	126	1.57	0.116	0.332
Synpo	ENSMUSG00000043079	113	1.57	0.117	0.332
Adgrl1	ENSMUSG00000013033	130	1.57	0.118	0.333
Cdc42bpb	ENSMUSG00000021279	137	1.57	0.118	0.333
Dpf2	ENSMUSG00000024826	119	1.57	0.117	0.333
Adam12	ENSMUSG00000054555	123	1.57	0.117	0.333
Itsn1	ENSMUSG00000022957	114	1.56	0.118	0.334
Kdm5c	ENSMUSG00000025332	137	1.56	0.118	0.334
Rab5c	ENSMUSG00000019173	110	1.56	0.119	0.335
Minpp1	ENSMUSG00000024896	118	1.56	0.119	0.335
Nsd1	ENSMUSG00000021488	119	1.56	0.119	0.336
Smarcd3	ENSMUSG00000028949	121	1.56	0.12	0.336
Kmt2d	ENSMUSG00000048154	149	1.56	0.12	0.336
Fes	ENSMUSG00000053158	130	1.56	0.119	0.336
Myh10	ENSMUSG00000020900	114	1.55	0.12	0.336
Ilf3	ENSMUSG00000032178	118	1.55	0.12	0.336
Bicd2	ENSMUSG00000037933	116	1.55	0.121	0.337
Ptp4a3	ENSMUSG00000059895	118	1.55	0.121	0.337
Cdh2	ENSMUSG00000024304	112	1.55	0.122	0.338
Pik3c2a	ENSMUSG00000030660	92	1.55	0.122	0.338
Myadm	ENSMUSG00000068566	113	1.55	0.122	0.338
Slc9a3r2	ENSMUSG00000002504	122	1.54	0.123	0.338
Slc41a3	ENSMUSG00000030089	157	1.54	0.123	0.338
Scap	ENSMUSG00000032485	116	1.54	0.123	0.338
Fkrp	ENSMUSG00000048920	133	1.54	0.122	0.338
Kmt5a	ENSMUSG00000049327	113	1.54	0.123	0.338
Ube2b	ENSMUSG00000020390	112	1.54	0.124	0.339
Tgm2	ENSMUSG00000037820	111	1.54	0.124	0.339
Sox9	ENSMUSG00000000567	127	1.54	0.124	0.34
Kdm2b	ENSMUSG00000029475	142	1.54	0.124	0.34
Zranb1	ENSMUSG00000030967	125	1.53	0.125	0.341
Phf12	ENSMUSG00000037791	138	1.53	0.125	0.341
Scand1	ENSMUSG00000046229	110	1.53	0.125	0.341
Drap1	ENSMUSG00000024914	113	1.53	0.126	0.342
Cap1	ENSMUSG00000028656	122	1.53	0.126	0.342
Arhgef7	ENSMUSG00000031511	135	1.53	0.126	0.342
Ppp1r9b	ENSMUSG00000038976	133	1.53	0.126	0.342
Hsp90aa1	ENSMUSG00000021270	117	1.53	0.126	0.343
Asf1a	ENSMUSG00000019857	123	1.53	0.127	0.344
Stx2	ENSMUSG00000029428	122	1.53	0.127	0.344
Utrn	ENSMUSG00000019820	125	1.52	0.128	0.344
Pds5a	ENSMUSG00000029202	117	1.52	0.128	0.344
Tspan9	ENSMUSG00000030352	115	1.52	0.129	0.346
Mga	ENSMUSG00000033943	122	1.52	0.128	0.346
Metap2	ENSMUSG00000036112	110	1.52	0.129	0.346
Atf6b	ENSMUSG00000015461	115	1.52	0.13	0.348
Bcap31	ENSMUSG00000002015	118	1.51	0.13	0.348
Vdac1	ENSMUSG00000020402	113	1.51	0.13	0.348
Akirin2	ENSMUSG00000028291	113	1.51	0.131	0.348
Rab35	ENSMUSG00000029518	118	1.51	0.13	0.348
Nsf	ENSMUSG00000034187	125	1.51	0.13	0.348
Map4k5	ENSMUSG00000034761	113	1.51	0.131	0.348
Suds3	ENSMUSG00000066900	110	1.51	0.131	0.348
Phtf1	ENSMUSG00000058388	127	1.51	0.132	0.35
Cops5	ENSMUSG00000025917	112	1.5	0.134	0.35
Il1r1	ENSMUSG00000026072	115	1.5	0.133	0.35
Rnf4	ENSMUSG00000029110	111	1.5	0.134	0.35
Ran	ENSMUSG00000029430	117	1.5	0.133	0.35
Maz	ENSMUSG00000030678	115	1.5	0.132	0.35
Cdk16	ENSMUSG00000031065	112	1.5	0.133	0.35
Nfatc1	ENSMUSG00000033016	90	1.5	0.133	0.35
Nup62	ENSMUSG00000109511	115	1.5	0.133	0.35
Ada	ENSMUSG00000017697	48	1.5	0.134	0.351
Sgk1	ENSMUSG00000019970	119	1.49	0.136	0.353
Ncs1	ENSMUSG00000062661	122	1.49	0.135	0.353
Nipa2	ENSMUSG00000030452	121	1.49	0.136	0.354
Pip5k1c	ENSMUSG00000034902	99	1.49	0.136	0.354
Supt3	ENSMUSG00000038954	126	1.49	0.136	0.354
Aspscr1	ENSMUSG00000025142	109	1.49	0.137	0.355
C1qbp	ENSMUSG00000018446	113	1.48	0.138	0.357
Hbp1	ENSMUSG00000002996	117	1.48	0.138	0.358
Itch	ENSMUSG00000027598	146	1.48	0.139	0.358
Brd7	ENSMUSG00000031660	113	1.48	0.139	0.358
Tcf25	ENSMUSG00000001472	118	1.47	0.141	0.363
Puf60	ENSMUSG00000002524	116	1.47	0.141	0.363
Zfp91	ENSMUSG00000024695	111	1.47	0.142	0.365
Hspd1	ENSMUSG00000025980	113	1.47	0.142	0.365
Rab11a	ENSMUSG00000004771	128	1.46	0.143	0.366
Rrad	ENSMUSG00000031880	134	1.46	0.143	0.366
Gcc1	ENSMUSG00000029708	32	1.46	0.144	0.367
Nr2f6	ENSMUSG00000002393	109	1.46	0.144	0.368
Btf3	ENSMUSG00000021660	115	1.46	0.144	0.368
Sub1	ENSMUSG00000022205	122	1.46	0.145	0.368
Chd1	ENSMUSG00000023852	114	1.46	0.145	0.368
Hsbp1	ENSMUSG00000031839	119	1.46	0.145	0.368
Zbtb21	ENSMUSG00000046962	139	1.46	0.146	0.368
Rhob	ENSMUSG00000054364	120	1.46	0.145	0.368
Zfp771	ENSMUSG00000054716	115	1.46	0.145	0.368
Pcgf5	ENSMUSG00000024805	125	1.45	0.146	0.369
Cdc42se1	ENSMUSG00000046722	114	1.45	0.146	0.369
Hyal2	ENSMUSG00000010047	110	1.45	0.147	0.371
Rab10	ENSMUSG00000020671	115	1.45	0.147	0.371
Ppp2r1a	ENSMUSG00000007564	113	1.45	0.148	0.372
Taf13	ENSMUSG00000048100	115	1.45	0.148	0.373
Edf1	ENSMUSG00000015092	118	1.44	0.149	0.373
Cnot8	ENSMUSG00000020515	114	1.44	0.15	0.373
Prkcd	ENSMUSG00000021948	115	1.44	0.151	0.373
Fbxw7	ENSMUSG00000028086	53	1.44	0.149	0.373
Smarcad1	ENSMUSG00000029920	131	1.44	0.149	0.373
Stoml1	ENSMUSG00000032333	129	1.44	0.149	0.373
Pi4ka	ENSMUSG00000041720	57	1.44	0.15	0.373
Spred2	ENSMUSG00000045671	148	1.44	0.149	0.373
Orai1	ENSMUSG00000049686	145	1.44	0.15	0.373
Cggbp1	ENSMUSG00000054604	114	1.44	0.149	0.373
Lmcd1	ENSMUSG00000057604	92	1.44	0.149	0.373
Zfp703	ENSMUSG00000085795	28	1.44	0.15	0.373
Yipf3	ENSMUSG00000071074	115	1.43	0.152	0.376
Rhog	ENSMUSG00000073982	121	1.43	0.152	0.376
Myo1c	ENSMUSG00000017774	110	1.43	0.153	0.377
Rac1	ENSMUSG00000001847	120	1.43	0.153	0.378
Emp2	ENSMUSG00000022505	113	1.43	0.154	0.378
Snx4	ENSMUSG00000022808	123	1.42	0.155	0.38
Pear1	ENSMUSG00000028073	115	1.42	0.155	0.38
Ruvbl1	ENSMUSG00000030079	109	1.42	0.155	0.38
Haus7	ENSMUSG00000031371	119	1.42	0.155	0.38
Pigu	ENSMUSG00000038383	121	1.42	0.156	0.38
Hdac5	ENSMUSG00000008855	119	1.42	0.157	0.381
Mlx	ENSMUSG00000017801	120	1.42	0.156	0.381
Blzf1	ENSMUSG00000026577	123	1.42	0.156	0.381
Vamp3	ENSMUSG00000028955	124	1.42	0.156	0.381
Topors	ENSMUSG00000036822	112	1.42	0.157	0.381
Sertad2	ENSMUSG00000049800	117	1.42	0.157	0.381
Taf12	ENSMUSG00000028899	113	1.41	0.158	0.382
Arhgef1	ENSMUSG00000040940	108	1.41	0.157	0.382
Camkk2	ENSMUSG00000029471	119	1.41	0.159	0.383
Mtf2	ENSMUSG00000029267	143	1.41	0.159	0.384
Dnajc5	ENSMUSG00000000826	111	1.41	0.16	0.385
Dlg4	ENSMUSG00000020886	123	1.4	0.16	0.385
Litaf	ENSMUSG00000022500	116	1.4	0.161	0.385
Tax1bp3	ENSMUSG00000040158	115	1.4	0.16	0.385
Sipa1l1	ENSMUSG00000042700	36	1.4	0.161	0.386
Phb2	ENSMUSG00000004264	112	1.4	0.162	0.387
Dnajc1	ENSMUSG00000026740	116	1.4	0.162	0.387
Zcchc17	ENSMUSG00000028772	110	1.4	0.162	0.387
Traf7	ENSMUSG00000052752	117	1.4	0.162	0.387
Ptk2	ENSMUSG00000022607	144	1.4	0.163	0.388
Zbtb1	ENSMUSG00000033454	116	1.4	0.163	0.388
Rexo4	ENSMUSG00000052406	134	1.4	0.163	0.388
Vps72	ENSMUSG00000008958	110	1.39	0.164	0.389
Gnai3	ENSMUSG00000000001	111	1.39	0.165	0.391
Hdac3	ENSMUSG00000024454	114	1.39	0.165	0.391
Gps2	ENSMUSG00000023170	119	1.39	0.166	0.392
Cnot7	ENSMUSG00000031601	112	1.39	0.166	0.392
Shc1	ENSMUSG00000042626	112	1.39	0.166	0.392
Krit1	ENSMUSG00000000600	117	1.38	0.166	0.392
Zdhhc4	ENSMUSG00000001844	114	1.38	0.169	0.392
Dedd	ENSMUSG00000013973	86	1.38	0.168	0.392
Sirt2	ENSMUSG00000015149	113	1.38	0.167	0.392
Capn10	ENSMUSG00000026270	119	1.38	0.167	0.392
Bcl10	ENSMUSG00000028191	111	1.38	0.168	0.392
Trappc4	ENSMUSG00000032112	123	1.38	0.169	0.392
Twist1	ENSMUSG00000035799	122	1.38	0.168	0.392
Atp6v1g1	ENSMUSG00000039105	118	1.38	0.167	0.392
Gja1	ENSMUSG00000050953	115	1.38	0.169	0.392
Ssbp3	ENSMUSG00000061887	117	1.38	0.168	0.392
Hes6	ENSMUSG00000067071	114	1.38	0.167	0.392
Keap1	ENSMUSG00000003308	113	1.37	0.17	0.393
Elp5	ENSMUSG00000018565	117	1.37	0.172	0.393
Ccdc59	ENSMUSG00000019897	113	1.37	0.171	0.393
Hmg20b	ENSMUSG00000020232	114	1.37	0.172	0.393
Ifnar1	ENSMUSG00000022967	112	1.37	0.169	0.393
Hbegf	ENSMUSG00000024486	121	1.37	0.172	0.393
Sf1	ENSMUSG00000024949	112	1.37	0.17	0.393
Ctnna1	ENSMUSG00000037815	111	1.37	0.172	0.393
Ccdc8	ENSMUSG00000041117	128	1.37	0.169	0.393
Zfp444	ENSMUSG00000044876	141	1.37	0.171	0.393
Nsd2	ENSMUSG00000057406	144	1.37	0.171	0.393
Zfp110	ENSMUSG00000058638	136	1.37	0.171	0.393
Zfp511	ENSMUSG00000025470	116	1.36	0.172	0.394
Daxx	ENSMUSG00000002307	114	1.36	0.174	0.395
Ywhah	ENSMUSG00000018965	107	1.36	0.173	0.395
Srebf2	ENSMUSG00000022463	119	1.36	0.173	0.395
Csf1r	ENSMUSG00000024621	68	1.36	0.174	0.395
Nfx1	ENSMUSG00000028423	114	1.36	0.174	0.395
Iqgap1	ENSMUSG00000030536	116	1.36	0.174	0.395
Tbc1d10a	ENSMUSG00000034412	119	1.36	0.174	0.395
Hand2	ENSMUSG00000038193	118	1.36	0.174	0.395
Nab1	ENSMUSG00000002881	119	1.36	0.175	0.396
Lztr1	ENSMUSG00000022761	115	1.36	0.175	0.396
Zfp787	ENSMUSG00000046792	121	1.36	0.175	0.396
Ube2i	ENSMUSG00000015120	116	1.35	0.176	0.397
Hmgn5	ENSMUSG00000031245	115	1.35	0.176	0.397
Zfp428	ENSMUSG00000064264	126	1.35	0.176	0.397
Ilf2	ENSMUSG00000001016	119	1.35	0.178	0.399
Mcoln1	ENSMUSG00000004567	89	1.35	0.178	0.399
Rnf20	ENSMUSG00000028309	117	1.35	0.178	0.399
Tnfsf9	ENSMUSG00000035678	131	1.35	0.178	0.399
Ubqln2	ENSMUSG00000050148	117	1.35	0.177	0.399
Cdc42se2	ENSMUSG00000052298	132	1.35	0.178	0.399
Khdrbs1	ENSMUSG00000028790	116	1.34	0.179	0.399
Med16	ENSMUSG00000013833	128	1.34	0.18	0.401
Psen1	ENSMUSG00000019969	116	1.34	0.181	0.402
Fasn	ENSMUSG00000025153	121	1.34	0.181	0.402
Tulp4	ENSMUSG00000034377	112	1.34	0.18	0.402
Arf6	ENSMUSG00000044147	111	1.34	0.181	0.402
Gsk3b	ENSMUSG00000022812	110	1.34	0.182	0.403
Pspc1	ENSMUSG00000021938	118	1.33	0.183	0.403
Pip4k2a	ENSMUSG00000026737	51	1.33	0.183	0.403
Mtfr1	ENSMUSG00000027601	113	1.33	0.183	0.403
Atp1a1	ENSMUSG00000033161	109	1.33	0.182	0.403
Pdk1	ENSMUSG00000006494	123	1.33	0.184	0.404
Hnrnpab	ENSMUSG00000020358	110	1.33	0.183	0.404
Ppm1a	ENSMUSG00000021096	116	1.33	0.183	0.404
Gpbp1	ENSMUSG00000032745	118	1.33	0.184	0.404
Tgif2	ENSMUSG00000062175	133	1.33	0.184	0.404
Rarg	ENSMUSG00000001288	117	1.32	0.186	0.405
Cyth2	ENSMUSG00000003269	116	1.32	0.186	0.405
Men1	ENSMUSG00000024947	114	1.32	0.186	0.405
Uimc1	ENSMUSG00000025878	116	1.32	0.186	0.405
Sgcb	ENSMUSG00000029156	122	1.32	0.186	0.405
Flywch1	ENSMUSG00000040097	119	1.32	0.185	0.405
Dnaja3	ENSMUSG00000004069	116	1.32	0.188	0.407
Scfd1	ENSMUSG00000020952	116	1.32	0.187	0.407
Mypop	ENSMUSG00000048481	124	1.32	0.188	0.407
Skap2	ENSMUSG00000059182	110	1.32	0.188	0.407
Zdhhc7	ENSMUSG00000031823	120	1.32	0.188	0.408
Clic1	ENSMUSG00000007041	121	1.31	0.189	0.409
Rhbdf2	ENSMUSG00000020806	92	1.31	0.19	0.409
Ssh1	ENSMUSG00000042121	125	1.31	0.19	0.409
Bcl2	ENSMUSG00000057329	32	1.31	0.189	0.409
Tada2a	ENSMUSG00000018651	131	1.31	0.191	0.41
Habp4	ENSMUSG00000021476	124	1.31	0.191	0.41
Zfand6	ENSMUSG00000030629	111	1.31	0.19	0.41
Cers6	ENSMUSG00000027035	151	1.31	0.192	0.411
Nat14	ENSMUSG00000035285	124	1.31	0.192	0.411
Rbbp4	ENSMUSG00000057236	122	1.31	0.192	0.411
Gab2	ENSMUSG00000004508	86	1.3	0.194	0.411
Snap47	ENSMUSG00000009894	112	1.3	0.194	0.411
Map2k3	ENSMUSG00000018932	111	1.3	0.195	0.411
Pttg1	ENSMUSG00000020415	113	1.3	0.193	0.411
Zfr	ENSMUSG00000022201	116	1.3	0.193	0.411
Atf1	ENSMUSG00000023027	123	1.3	0.194	0.411
Ctnnbip1	ENSMUSG00000028988	113	1.3	0.194	0.411
Slc30a9	ENSMUSG00000029221	120	1.3	0.192	0.411
Atf4	ENSMUSG00000042406	113	1.3	0.193	0.411
Trrap	ENSMUSG00000045482	128	1.3	0.194	0.411
Dnlz	ENSMUSG00000075467	120	1.3	0.194	0.411
Apc	ENSMUSG00000005871	134	1.29	0.197	0.412
Cbx5	ENSMUSG00000009575	109	1.29	0.197	0.412
Gle1	ENSMUSG00000019715	119	1.29	0.197	0.412
Nme2	ENSMUSG00000020857	113	1.29	0.196	0.412
Rela	ENSMUSG00000024927	115	1.29	0.197	0.412
Ikbkb	ENSMUSG00000031537	125	1.29	0.196	0.412
Ifi30	ENSMUSG00000031838	117	1.29	0.195	0.412
Dync1li1	ENSMUSG00000032435	114	1.29	0.196	0.412
Mier2	ENSMUSG00000042570	67	1.29	0.197	0.412
Ano10	ENSMUSG00000037949	119	1.29	0.198	0.413
Arhgef25	ENSMUSG00000019467	113	1.29	0.198	0.414
Atp9b	ENSMUSG00000024566	158	1.29	0.198	0.414
Icmt	ENSMUSG00000039662	106	1.29	0.198	0.414
Zfp106	ENSMUSG00000027288	117	1.28	0.199	0.414
Upf3a	ENSMUSG00000038398	125	1.28	0.2	0.416
Zfp830	ENSMUSG00000046010	136	1.28	0.2	0.416
Vps36	ENSMUSG00000031479	114	1.28	0.201	0.417
Tmem173	ENSMUSG00000024349	127	1.28	0.202	0.419
Ccdc88a	ENSMUSG00000032740	116	1.28	0.202	0.419
Zfp706	ENSMUSG00000062397	113	1.27	0.203	0.42
Adcy3	ENSMUSG00000020654	137	1.27	0.205	0.422
Srpk1	ENSMUSG00000004865	112	1.26	0.206	0.424
Sephs1	ENSMUSG00000026662	126	1.26	0.206	0.424
S1pr2	ENSMUSG00000043895	117	1.26	0.207	0.425
Pafah1b2	ENSMUSG00000003131	118	1.26	0.208	0.427
Elof1	ENSMUSG00000013822	114	1.26	0.208	0.427
Vasn	ENSMUSG00000039646	109	1.26	0.208	0.427
Zfp652	ENSMUSG00000075595	120	1.26	0.208	0.427
Hsf1	ENSMUSG00000022556	118	1.25	0.21	0.429
BC004004	ENSMUSG00000052712	109	1.25	0.21	0.429
Chmp1a	ENSMUSG00000000743	114	1.25	0.211	0.43
Slc52a2	ENSMUSG00000022560	122	1.25	0.211	0.43
Zkscan1	ENSMUSG00000029729	86	1.25	0.21	0.43
Ankrd27	ENSMUSG00000034867	123	1.25	0.211	0.43
Rap2a	ENSMUSG00000051615	115	1.25	0.211	0.43
Nf1	ENSMUSG00000020716	117	1.25	0.212	0.431
Smarcc1	ENSMUSG00000032481	112	1.25	0.212	0.431
Pias4	ENSMUSG00000004934	121	1.24	0.213	0.432
Pfdn1	ENSMUSG00000024346	127	1.24	0.214	0.432
Mmgt2	ENSMUSG00000048497	139	1.24	0.214	0.432
Prmt6	ENSMUSG00000049300	36	1.24	0.213	0.432
Rara	ENSMUSG00000037992	115	1.24	0.214	0.433
Ankrd11	ENSMUSG00000035569	114	1.24	0.217	0.436
Ddx39b	ENSMUSG00000019432	112	1.23	0.217	0.436
Rarb	ENSMUSG00000017491	140	1.23	0.218	0.437
Anp32a	ENSMUSG00000032249	120	1.23	0.218	0.437
Ruvbl2	ENSMUSG00000003868	117	1.23	0.219	0.438
Cib1	ENSMUSG00000030538	109	1.23	0.219	0.438
Zfp414	ENSMUSG00000073423	112	1.23	0.219	0.438
Glg1	ENSMUSG00000003316	119	1.23	0.22	0.439
Zfp623	ENSMUSG00000050846	92	1.23	0.22	0.439
Cltb	ENSMUSG00000047547	113	1.23	0.221	0.44
Hspa8	ENSMUSG00000015656	140	1.22	0.222	0.441
Raf1	ENSMUSG00000000441	110	1.22	0.223	0.443
Ccnk	ENSMUSG00000021258	66	1.22	0.223	0.443
Csde1	ENSMUSG00000068823	114	1.22	0.223	0.443
Supt4a	ENSMUSG00000020485	113	1.22	0.224	0.444
Rybp	ENSMUSG00000072872	26	1.22	0.224	0.444
Brwd1	ENSMUSG00000022914	112	1.21	0.224	0.444
Atp11a	ENSMUSG00000031441	129	1.21	0.225	0.444
Zfp524	ENSMUSG00000051184	150	1.21	0.225	0.445
Kat2a	ENSMUSG00000020918	115	1.21	0.228	0.449
Rbfox2	ENSMUSG00000033565	110	1.21	0.228	0.449
Cers5	ENSMUSG00000023021	114	1.2	0.229	0.45
Ash1l	ENSMUSG00000028053	116	1.2	0.229	0.45
Sppl2b	ENSMUSG00000035206	119	1.2	0.229	0.45
Arntl	ENSMUSG00000055116	110	1.2	0.229	0.45
Zc3h11a	ENSMUSG00000102976	128	1.2	0.229	0.45
Brd8	ENSMUSG00000003778	124	1.2	0.23	0.451
Tcf3	ENSMUSG00000020167	116	1.2	0.23	0.451
Slc46a1	ENSMUSG00000020829	26	1.2	0.231	0.452
Nif3l1	ENSMUSG00000026036	125	1.2	0.231	0.452
Ccar1	ENSMUSG00000020074	113	1.19	0.233	0.455
Tfip11	ENSMUSG00000029345	137	1.19	0.233	0.455
Ciao1	ENSMUSG00000003662	116	1.19	0.236	0.459
Mxd4	ENSMUSG00000037235	120	1.18	0.236	0.46
Ube2v1	ENSMUSG00000078923	134	1.18	0.237	0.46
Steap1	ENSMUSG00000015652	109	1.18	0.238	0.461
Frk	ENSMUSG00000019779	121	1.18	0.238	0.461
Dr1	ENSMUSG00000029265	112	1.18	0.237	0.461
Mynn	ENSMUSG00000037730	141	1.18	0.238	0.461
Dlgap4	ENSMUSG00000061689	110	1.18	0.237	0.461
Zmat5	ENSMUSG00000009076	123	1.18	0.239	0.462
Ctbp2	ENSMUSG00000030970	109	1.18	0.24	0.463
Mcts1	ENSMUSG00000000355	112	1.17	0.241	0.463
Zcchc9	ENSMUSG00000021621	117	1.17	0.24	0.463
Mr1	ENSMUSG00000026471	129	1.17	0.24	0.463
Smo	ENSMUSG00000001761	118	1.17	0.242	0.465
Tle1	ENSMUSG00000008305	114	1.17	0.242	0.465
Cux1	ENSMUSG00000029705	113	1.17	0.242	0.465
Ccnc	ENSMUSG00000028252	126	1.17	0.244	0.467
Ptov1	ENSMUSG00000038502	122	1.17	0.244	0.467
Stoml2	ENSMUSG00000028455	111	1.16	0.244	0.467
Atn1	ENSMUSG00000004263	110	1.16	0.245	0.468
Snx6	ENSMUSG00000005656	112	1.16	0.246	0.468
Cdc42ep5	ENSMUSG00000063838	113	1.16	0.246	0.468
Zfx	ENSMUSG00000079509	119	1.16	0.246	0.468
Ubqln1	ENSMUSG00000005312	109	1.16	0.246	0.469
Spred1	ENSMUSG00000027351	120	1.16	0.247	0.469
Phf20	ENSMUSG00000038116	114	1.16	0.246	0.469
Atxn1	ENSMUSG00000046876	119	1.16	0.248	0.471
Foxo3	ENSMUSG00000048756	124	1.15	0.248	0.471
Mark3	ENSMUSG00000007411	110	1.15	0.249	0.472
Gpm6b	ENSMUSG00000031342	114	1.15	0.251	0.472
Cbfa2t2	ENSMUSG00000038533	124	1.15	0.25	0.472
Spen	ENSMUSG00000040761	70	1.15	0.249	0.472
Usp22	ENSMUSG00000042506	113	1.15	0.25	0.472
Mapk1	ENSMUSG00000063358	109	1.15	0.25	0.472
Usf1	ENSMUSG00000026641	111	1.14	0.254	0.476
Irak1bp1	ENSMUSG00000032251	121	1.14	0.253	0.476
Ikzf5	ENSMUSG00000040167	150	1.14	0.253	0.476
Dpp3	ENSMUSG00000063904	115	1.14	0.254	0.477
Tshz3	ENSMUSG00000021217	98	1.14	0.255	0.478
Rasa1	ENSMUSG00000021549	120	1.14	0.255	0.478
E2f1	ENSMUSG00000027490	130	1.14	0.256	0.478
Camk2d	ENSMUSG00000053819	113	1.14	0.256	0.478
Rrp8	ENSMUSG00000030888	129	1.13	0.257	0.478
Serinc3	ENSMUSG00000017707	113	1.13	0.257	0.479
Il17rc	ENSMUSG00000030281	115	1.13	0.257	0.479
Map4	ENSMUSG00000032479	113	1.13	0.258	0.479
Arid5a	ENSMUSG00000037447	132	1.13	0.258	0.479
Zfand3	ENSMUSG00000044477	111	1.13	0.258	0.479
Baz1b	ENSMUSG00000002748	121	1.13	0.259	0.48
Taf10	ENSMUSG00000043866	111	1.13	0.258	0.48
Vps37b	ENSMUSG00000066278	107	1.13	0.259	0.48
Sec16a	ENSMUSG00000026924	123	1.13	0.26	0.481
Zfp523	ENSMUSG00000024220	57	1.12	0.262	0.483
2019-09-02	ENSMUSG00000026276	115	1.12	0.262	0.483
Zfp64	ENSMUSG00000027551	144	1.12	0.262	0.483
Snapc3	ENSMUSG00000028483	123	1.12	0.262	0.483
Zscan21	ENSMUSG00000037017	138	1.12	0.261	0.483
Tead1	ENSMUSG00000055320	119	1.12	0.262	0.483
Hipk1	ENSMUSG00000008730	135	1.11	0.266	0.487
Nelfa	ENSMUSG00000029111	112	1.11	0.268	0.49
Jam3	ENSMUSG00000031990	116	1.11	0.268	0.49
Safb	ENSMUSG00000071054	110	1.11	0.268	0.49
Mcm2	ENSMUSG00000002870	118	1.11	0.269	0.492
Mycbp	ENSMUSG00000028647	114	1.1	0.27	0.492
Taf5l	ENSMUSG00000038697	121	1.1	0.27	0.492
Zc3hc1	ENSMUSG00000039130	121	1.1	0.271	0.493
Prmt7	ENSMUSG00000060098	110	1.1	0.271	0.493
Pcgf3	ENSMUSG00000033623	132	1.1	0.271	0.494
Snap23	ENSMUSG00000027287	110	1.1	0.272	0.495
Rras2	ENSMUSG00000055723	115	1.1	0.272	0.495
Vamp7	ENSMUSG00000051412	109	1.1	0.273	0.496
Vamp2	ENSMUSG00000020894	117	1.09	0.274	0.497
Trip11	ENSMUSG00000021188	115	1.09	0.277	0.499
Rit1	ENSMUSG00000028057	111	1.09	0.276	0.499
Gtf2h5	ENSMUSG00000034345	113	1.09	0.277	0.499
Rgs3	ENSMUSG00000059810	116	1.09	0.277	0.499
Tbpl1	ENSMUSG00000071359	114	1.09	0.278	0.499
Gtf2h2	ENSMUSG00000021639	138	1.08	0.279	0.501
Usp14	ENSMUSG00000047879	109	1.08	0.279	0.501
Atp10a	ENSMUSG00000025324	55	1.08	0.281	0.503
Nono	ENSMUSG00000031311	117	1.08	0.281	0.503
Nelfb	ENSMUSG00000013465	120	1.08	0.282	0.504
Ssbp2	ENSMUSG00000003992	115	1.07	0.282	0.504
Nvl	ENSMUSG00000026516	155	1.07	0.282	0.504
Mms19	ENSMUSG00000025159	140	1.07	0.284	0.507
Taf6l	ENSMUSG00000003680	111	1.07	0.286	0.508
Zc3h18	ENSMUSG00000017478	118	1.07	0.286	0.508
Ppil2	ENSMUSG00000022771	113	1.07	0.285	0.508
C1d	ENSMUSG00000000581	124	1.07	0.286	0.509
Klhl7	ENSMUSG00000028986	136	1.06	0.287	0.51
Usp4	ENSMUSG00000032612	119	1.06	0.287	0.51
Relb	ENSMUSG00000002983	113	1.06	0.29	0.513
Trpm7	ENSMUSG00000027365	114	1.06	0.29	0.513
Sfswap	ENSMUSG00000029439	149	1.06	0.291	0.513
Ctnnd1	ENSMUSG00000034101	119	1.06	0.29	0.513
Pak1ip1	ENSMUSG00000038683	112	1.06	0.29	0.513
Zfp281	ENSMUSG00000041483	113	1.06	0.289	0.513
Zzef1	ENSMUSG00000055670	132	1.06	0.291	0.513
Ell	ENSMUSG00000070002	135	1.06	0.291	0.513
Mphosph8	ENSMUSG00000079184	119	1.06	0.291	0.513
Arid2	ENSMUSG00000033237	153	1.05	0.293	0.514
Cnot1	ENSMUSG00000036550	123	1.05	0.293	0.514
Zfp740	ENSMUSG00000046897	127	1.05	0.293	0.514
Zfp598	ENSMUSG00000041130	132	1.05	0.294	0.515
Rbbp8	ENSMUSG00000041238	122	1.05	0.294	0.515
Cir1	ENSMUSG00000041777	110	1.05	0.294	0.515
Ep300	ENSMUSG00000055024	114	1.05	0.293	0.515
Tdg	ENSMUSG00000034674	111	1.05	0.295	0.516
Siah2	ENSMUSG00000036432	133	1.05	0.296	0.517
Etnk1	ENSMUSG00000030275	118	1.04	0.296	0.517
Hmox1	ENSMUSG00000005413	116	1.04	0.298	0.519
Polr3k	ENSMUSG00000038628	111	1.04	0.298	0.519
Zfand5	ENSMUSG00000024750	113	1.04	0.299	0.52
Zfp326	ENSMUSG00000029290	118	1.04	0.299	0.52
Ybx3	ENSMUSG00000030189	127	1.04	0.299	0.52
Med1	ENSMUSG00000018160	117	1.04	0.3	0.521
E2f5	ENSMUSG00000027552	152	1.03	0.301	0.522
Zfp503	ENSMUSG00000039081	110	1.03	0.301	0.522
Rftn1	ENSMUSG00000039316	119	1.03	0.301	0.522
Vamp8	ENSMUSG00000050732	121	1.03	0.302	0.523
Rab23	ENSMUSG00000004768	31	1.03	0.303	0.524
Uri1	ENSMUSG00000030421	122	1.03	0.303	0.524
Atp6v1c1	ENSMUSG00000022295	122	1.03	0.305	0.526
Apex1	ENSMUSG00000035960	111	1.03	0.305	0.526
Smpd1	ENSMUSG00000037049	112	1.03	0.305	0.526
Cdkn1b	ENSMUSG00000003031	127	1.02	0.306	0.526
Mafk	ENSMUSG00000018143	131	1.02	0.307	0.526
Itm2c	ENSMUSG00000026223	113	1.02	0.307	0.526
Zdhhc13	ENSMUSG00000030471	121	1.02	0.306	0.526
Taf2	ENSMUSG00000037343	93	1.02	0.305	0.526
Tbcd	ENSMUSG00000039230	130	1.02	0.306	0.526
Pja2	ENSMUSG00000024083	112	1.02	0.308	0.527
Sltm	ENSMUSG00000032212	116	1.02	0.308	0.527
Ciz1	ENSMUSG00000039205	121	1.02	0.308	0.527
Pik3r1	ENSMUSG00000041417	152	1.02	0.307	0.527
Mta3	ENSMUSG00000055817	116	1.02	0.309	0.527
Thap7	ENSMUSG00000022760	120	1.02	0.31	0.528
Ash2l	ENSMUSG00000031575	118	1.02	0.309	0.528
Vhl	ENSMUSG00000033933	132	1.02	0.31	0.528
Acox1	ENSMUSG00000020777	112	1.01	0.311	0.53
Smad5	ENSMUSG00000021540	116	1.01	0.313	0.532
Mmgt1	ENSMUSG00000061273	47	1.01	0.313	0.532
Zmynd11	ENSMUSG00000021156	113	1.01	0.314	0.533
Rap2c	ENSMUSG00000050029	121	1.01	0.315	0.534
Smarca5	ENSMUSG00000031715	109	1	0.315	0.534
Nae1	ENSMUSG00000031878	116	1	0.316	0.534
Epn1	ENSMUSG00000035203	110	1	0.315	0.534
Swap70	ENSMUSG00000031015	155	1	0.317	0.536
Dmap1	ENSMUSG00000009640	118	1	0.319	0.537
Aatf	ENSMUSG00000018697	114	1	0.318	0.537
Anxa7	ENSMUSG00000021814	111	1	0.317	0.537
Ubap1	ENSMUSG00000028437	109	1	0.318	0.537
Wbp4	ENSMUSG00000022023	118	0.99	0.32	0.538
Nras	ENSMUSG00000027852	114	0.99	0.321	0.538
Pip5k1a	ENSMUSG00000028126	113	0.99	0.32	0.538
Eri3	ENSMUSG00000033423	113	0.99	0.324	0.543
Crlf3	ENSMUSG00000017561	90	0.98	0.325	0.543
Sema4c	ENSMUSG00000026121	132	0.98	0.325	0.543
Orc6	ENSMUSG00000031697	118	0.98	0.325	0.543
Esyt1	ENSMUSG00000025366	115	0.98	0.326	0.544
Kdm2a	ENSMUSG00000054611	122	0.98	0.327	0.544
Cct3	ENSMUSG00000001416	113	0.98	0.328	0.545
Zdhhc12	ENSMUSG00000015335	125	0.98	0.328	0.545
Atp6v1a	ENSMUSG00000052459	117	0.98	0.328	0.545
Acin1	ENSMUSG00000022185	113	0.98	0.329	0.546
Zfp513	ENSMUSG00000043059	116	0.98	0.329	0.546
Ccne1	ENSMUSG00000002068	103	0.97	0.332	0.55
Zfp639	ENSMUSG00000027667	116	0.97	0.332	0.55
Med21	ENSMUSG00000030291	113	0.97	0.332	0.55
Mta2	ENSMUSG00000071646	115	0.97	0.332	0.55
Pnn	ENSMUSG00000020994	111	0.97	0.333	0.551
Mcm4	ENSMUSG00000022673	125	0.97	0.333	0.551
Slc17a5	ENSMUSG00000049624	81	0.97	0.334	0.551
Zfp687	ENSMUSG00000019338	110	0.97	0.334	0.552
Gopc	ENSMUSG00000019861	127	0.96	0.336	0.553
Sap30l	ENSMUSG00000020519	115	0.96	0.336	0.553
Prmt5	ENSMUSG00000023110	112	0.96	0.336	0.553
Slc27a1	ENSMUSG00000031808	61	0.96	0.336	0.553
Rab4b	ENSMUSG00000053291	128	0.96	0.337	0.554
Yes1	ENSMUSG00000014932	140	0.96	0.338	0.555
Tardbp	ENSMUSG00000041459	121	0.96	0.338	0.555
Ptp4a2	ENSMUSG00000028788	114	0.96	0.34	0.556
Zfp358	ENSMUSG00000047264	114	0.96	0.339	0.556
Sipa1	ENSMUSG00000056917	110	0.95	0.34	0.556
Chd8	ENSMUSG00000053754	134	0.95	0.341	0.557
Stau1	ENSMUSG00000039536	112	0.95	0.343	0.559
Tbp	ENSMUSG00000014767	36	0.95	0.344	0.56
Homer1	ENSMUSG00000007617	133	0.94	0.345	0.56
Aip	ENSMUSG00000024847	112	0.94	0.345	0.56
Bclaf1	ENSMUSG00000037608	113	0.94	0.346	0.561
Ecd	ENSMUSG00000021810	115	0.94	0.347	0.562
Ccnl2	ENSMUSG00000029068	112	0.94	0.346	0.562
Pqbp1	ENSMUSG00000031157	113	0.94	0.348	0.563
Rock1	ENSMUSG00000024290	114	0.94	0.349	0.564
Ddit3	ENSMUSG00000025408	125	0.94	0.349	0.564
Cul5	ENSMUSG00000032030	119	0.94	0.349	0.564
Tfdp2	ENSMUSG00000032411	117	0.93	0.35	0.565
Nubp1	ENSMUSG00000022503	116	0.93	0.352	0.566
Trip6	ENSMUSG00000023348	112	0.93	0.353	0.566
Zdhhc6	ENSMUSG00000024982	115	0.93	0.353	0.566
Casp8	ENSMUSG00000026029	113	0.93	0.352	0.566
Asxl2	ENSMUSG00000037486	139	0.93	0.352	0.566
Mbtd1	ENSMUSG00000059474	114	0.93	0.351	0.566
Med27	ENSMUSG00000026799	121	0.93	0.354	0.567
Atf2	ENSMUSG00000027104	122	0.93	0.354	0.567
Ppie	ENSMUSG00000028651	113	0.93	0.354	0.567
Mrpl42	ENSMUSG00000062981	113	0.93	0.355	0.567
Zranb2	ENSMUSG00000028180	112	0.92	0.355	0.568
Gtf2h3	ENSMUSG00000029387	122	0.92	0.356	0.568
Pknox1	ENSMUSG00000006705	126	0.92	0.359	0.572
Zmat2	ENSMUSG00000001383	112	0.92	0.36	0.573
Pdcd10	ENSMUSG00000027835	108	0.92	0.36	0.573
Chp1	ENSMUSG00000014077	117	0.91	0.361	0.574
Kras	ENSMUSG00000030265	118	0.91	0.361	0.574
Meis3	ENSMUSG00000041420	109	0.91	0.361	0.574
Tmem219	ENSMUSG00000060538	113	0.91	0.361	0.574
Tada1	ENSMUSG00000026563	115	0.91	0.363	0.575
Coro1b	ENSMUSG00000024835	110	0.91	0.365	0.577
Crtc3	ENSMUSG00000030527	136	0.91	0.365	0.577
Dnttip2	ENSMUSG00000039756	114	0.91	0.365	0.577
Nsd3	ENSMUSG00000054823	118	0.91	0.365	0.577
Tead3	ENSMUSG00000002249	75	0.9	0.367	0.578
Phf1	ENSMUSG00000024193	133	0.9	0.366	0.578
Phb	ENSMUSG00000038845	111	0.9	0.367	0.578
Trp53	ENSMUSG00000059552	110	0.9	0.367	0.578
Zfp664	ENSMUSG00000079215	124	0.9	0.368	0.579
Eps15	ENSMUSG00000028552	124	0.9	0.369	0.58
Jmy	ENSMUSG00000021690	130	0.9	0.37	0.581
Lin7c	ENSMUSG00000027162	112	0.9	0.371	0.581
Erc1	ENSMUSG00000030172	113	0.9	0.37	0.581
Grb2	ENSMUSG00000059923	110	0.9	0.37	0.581
Gtf2h4	ENSMUSG00000001524	133	0.89	0.371	0.581
Atad1	ENSMUSG00000013662	113	0.89	0.372	0.581
Xrcc6	ENSMUSG00000022471	124	0.89	0.372	0.581
Rab14	ENSMUSG00000026878	111	0.89	0.372	0.581
Setd2	ENSMUSG00000044791	122	0.89	0.371	0.581
Taf1b	ENSMUSG00000059669	26	0.89	0.371	0.581
Slc27a4	ENSMUSG00000059316	119	0.89	0.373	0.582
Sap30bp	ENSMUSG00000020755	115	0.89	0.375	0.585
Eny2	ENSMUSG00000022338	119	0.89	0.375	0.585
Slc4a1ap	ENSMUSG00000029141	148	0.89	0.376	0.585
Stambp	ENSMUSG00000006906	142	0.88	0.378	0.587
Slc2a8	ENSMUSG00000026791	134	0.88	0.378	0.587
Lmo4	ENSMUSG00000028266	111	0.88	0.379	0.587
Arap1	ENSMUSG00000032812	121	0.88	0.377	0.587
Atp6v1b2	ENSMUSG00000006273	114	0.88	0.38	0.589
Rnpep	ENSMUSG00000041926	119	0.88	0.38	0.589
Cnot3	ENSMUSG00000035632	112	0.88	0.381	0.59
Med29	ENSMUSG00000003444	114	0.87	0.382	0.591
Erlin2	ENSMUSG00000031483	134	0.87	0.382	0.591
Pxk	ENSMUSG00000033885	120	0.87	0.384	0.591
Prkci	ENSMUSG00000037643	100	0.87	0.383	0.591
Zfp451	ENSMUSG00000042197	124	0.87	0.384	0.591
Hmgb2	ENSMUSG00000054717	110	0.87	0.384	0.591
Purb	ENSMUSG00000094483	113	0.87	0.384	0.591
Zc3h7a	ENSMUSG00000037965	118	0.87	0.385	0.592
Gdf6	ENSMUSG00000051279	121	0.87	0.385	0.593
Glrx2	ENSMUSG00000018196	118	0.87	0.386	0.594
Esyt2	ENSMUSG00000021171	113	0.86	0.387	0.594
Hat1	ENSMUSG00000027018	115	0.86	0.387	0.594
Htatsf1	ENSMUSG00000067873	122	0.86	0.387	0.594
Smad7	ENSMUSG00000025880	122	0.86	0.389	0.596
Katna1	ENSMUSG00000019794	120	0.86	0.391	0.597
Phf2	ENSMUSG00000038025	45	0.86	0.391	0.597
Rxrb	ENSMUSG00000039656	119	0.86	0.391	0.597
Esf1	ENSMUSG00000045624	120	0.86	0.391	0.597
Esd	ENSMUSG00000021996	124	0.85	0.393	0.598
Ring1	ENSMUSG00000024325	120	0.85	0.393	0.598
Fgfr1	ENSMUSG00000031565	110	0.85	0.393	0.598
Pbrm1	ENSMUSG00000042323	117	0.85	0.394	0.598
Arsa	ENSMUSG00000022620	118	0.85	0.394	0.599
Clock	ENSMUSG00000029238	153	0.85	0.395	0.599
Srr	ENSMUSG00000001323	64	0.85	0.398	0.6
Nfyb	ENSMUSG00000020248	113	0.85	0.397	0.6
Ephb4	ENSMUSG00000029710	160	0.85	0.398	0.6
Ing4	ENSMUSG00000030330	127	0.85	0.397	0.6
Tial1	ENSMUSG00000030846	111	0.85	0.397	0.6
Plekha2	ENSMUSG00000031557	128	0.85	0.397	0.6
Pias1	ENSMUSG00000032405	116	0.85	0.396	0.6
Htatip2	ENSMUSG00000039745	112	0.84	0.399	0.601
Tonsl	ENSMUSG00000059323	111	0.84	0.399	0.602
Ncoa6	ENSMUSG00000038369	93	0.84	0.401	0.604
Dbnl	ENSMUSG00000020476	113	0.84	0.402	0.605
Mbd1	ENSMUSG00000024561	130	0.84	0.402	0.605
Nup35	ENSMUSG00000026999	151	0.84	0.404	0.606
Mgrn1	ENSMUSG00000022517	113	0.83	0.404	0.606
Nab2	ENSMUSG00000025402	113	0.83	0.405	0.607
Zfp330	ENSMUSG00000031711	115	0.83	0.405	0.607
Nlgn2	ENSMUSG00000051790	124	0.83	0.405	0.607
Il10rb	ENSMUSG00000022969	112	0.83	0.406	0.608
Prkg2	ENSMUSG00000029334	141	0.83	0.406	0.608
Rap1a	ENSMUSG00000068798	113	0.83	0.409	0.611
Zc3h15	ENSMUSG00000027091	120	0.82	0.411	0.613
Rilpl1	ENSMUSG00000029392	113	0.82	0.411	0.613
Slc4a7	ENSMUSG00000021733	137	0.82	0.414	0.614
Phf10	ENSMUSG00000023883	118	0.82	0.414	0.614
Taf1d	ENSMUSG00000031939	124	0.82	0.413	0.614
Zmynd8	ENSMUSG00000039671	114	0.82	0.413	0.614
Flad1	ENSMUSG00000042642	129	0.82	0.413	0.614
Irf2bp1	ENSMUSG00000044030	131	0.82	0.414	0.614
Pdpk1	ENSMUSG00000024122	137	0.81	0.415	0.615
Plin2	ENSMUSG00000028494	111	0.81	0.416	0.615
Gatad2b	ENSMUSG00000042390	112	0.81	0.416	0.615
Zfp638	ENSMUSG00000030016	119	0.81	0.418	0.617
Zmym5	ENSMUSG00000040123	121	0.81	0.418	0.617
Zc3h3	ENSMUSG00000075600	54	0.81	0.418	0.617
Tbc1d10b	ENSMUSG00000042492	148	0.81	0.419	0.618
Zfp825	ENSMUSG00000069208	142	0.81	0.419	0.618
Nr1h2	ENSMUSG00000060601	118	0.81	0.42	0.619
Rab4a	ENSMUSG00000019478	113	0.8	0.422	0.619
Sin3b	ENSMUSG00000031622	112	0.8	0.421	0.619
Trip4	ENSMUSG00000032386	117	0.8	0.422	0.619
Ssbp4	ENSMUSG00000070003	114	0.8	0.421	0.619
Zfp24	ENSMUSG00000051469	102	0.8	0.423	0.621
Ewsr1	ENSMUSG00000009079	113	0.8	0.424	0.622
Npm1	ENSMUSG00000057113	115	0.8	0.425	0.622
Naa15	ENSMUSG00000063273	117	0.8	0.426	0.624
Arl6	ENSMUSG00000022722	116	0.79	0.427	0.625
Cebpg	ENSMUSG00000056216	120	0.79	0.427	0.625
Ddx54	ENSMUSG00000029599	115	0.79	0.429	0.627
Tceanc2	ENSMUSG00000028619	66	0.79	0.43	0.628
Smarce1	ENSMUSG00000037935	110	0.78	0.433	0.631
Ifnar2	ENSMUSG00000022971	114	0.78	0.436	0.635
Cbx3	ENSMUSG00000029836	119	0.78	0.437	0.635
Atf7	ENSMUSG00000099083	90	0.78	0.437	0.635
Pde4d	ENSMUSG00000021699	86	0.77	0.439	0.636
Zcrb1	ENSMUSG00000022635	116	0.77	0.44	0.636
Leo1	ENSMUSG00000042487	122	0.77	0.439	0.636
Gnai1	ENSMUSG00000057614	37	0.77	0.438	0.636
Znhit1	ENSMUSG00000059518	111	0.77	0.439	0.636
Meis1	ENSMUSG00000020160	120	0.77	0.442	0.638
Dmtf1	ENSMUSG00000042508	136	0.77	0.444	0.639
Zc3h13	ENSMUSG00000022000	120	0.76	0.446	0.64
Dxo	ENSMUSG00000040482	125	0.76	0.446	0.641
Cdk8	ENSMUSG00000029635	133	0.75	0.451	0.646
Prkca	ENSMUSG00000050965	134	0.75	0.451	0.646
Tgfbr1	ENSMUSG00000007613	119	0.75	0.453	0.647
Dcaf6	ENSMUSG00000026571	54	0.75	0.452	0.647
Stom	ENSMUSG00000026880	61	0.75	0.452	0.647
Rest	ENSMUSG00000029249	111	0.75	0.453	0.647
Aoc3	ENSMUSG00000019326	155	0.75	0.454	0.649
Polr2i	ENSMUSG00000019738	111	0.75	0.454	0.649
Ccnt2	ENSMUSG00000026349	138	0.75	0.455	0.649
Nfe2l1	ENSMUSG00000038615	114	0.74	0.46	0.654
Zfp637	ENSMUSG00000059689	110	0.74	0.459	0.654
Slc9a6	ENSMUSG00000060681	140	0.74	0.46	0.654
Stxbp3	ENSMUSG00000027882	110	0.74	0.462	0.655
Plxnb2	ENSMUSG00000036606	110	0.74	0.461	0.655
Zfyve19	ENSMUSG00000068580	136	0.74	0.461	0.655
Clcn5	ENSMUSG00000004317	132	0.73	0.466	0.656
Plgrkt	ENSMUSG00000016495	113	0.73	0.465	0.656
Arl13b	ENSMUSG00000022911	122	0.73	0.463	0.656
Mib1	ENSMUSG00000024294	122	0.73	0.464	0.656
Taf3	ENSMUSG00000025782	137	0.73	0.463	0.656
Itgav	ENSMUSG00000027087	117	0.73	0.465	0.656
Tmem30a	ENSMUSG00000032328	113	0.73	0.466	0.656
Neo1	ENSMUSG00000032340	116	0.73	0.466	0.656
Gpbp1l1	ENSMUSG00000034042	124	0.73	0.463	0.656
Hnrnpul1	ENSMUSG00000040725	112	0.73	0.464	0.656
Tspyl2	ENSMUSG00000041096	132	0.73	0.467	0.656
Trim32	ENSMUSG00000051675	117	0.73	0.466	0.656
E2f6	ENSMUSG00000057469	100	0.73	0.468	0.658
Wasl	ENSMUSG00000029684	119	0.72	0.47	0.66
Cdc5l	ENSMUSG00000023932	115	0.72	0.472	0.661
Ing1	ENSMUSG00000045969	120	0.72	0.474	0.663
Epc2	ENSMUSG00000069495	157	0.72	0.474	0.663
Aktip	ENSMUSG00000031667	119	0.71	0.475	0.664
Atp2b1	ENSMUSG00000019943	112	0.71	0.479	0.667
Rnf14	ENSMUSG00000060450	116	0.71	0.479	0.667
Cdk5	ENSMUSG00000028969	114	0.71	0.481	0.669
Lrpprc	ENSMUSG00000024120	125	0.7	0.483	0.669
Creb1	ENSMUSG00000025958	124	0.7	0.481	0.669
Vgll4	ENSMUSG00000030315	115	0.7	0.482	0.669
Zfp260	ENSMUSG00000049421	113	0.7	0.481	0.669
Zfp622	ENSMUSG00000052253	109	0.7	0.482	0.669
Pdlim1	ENSMUSG00000055044	117	0.7	0.482	0.669
Eid1	ENSMUSG00000091337	112	0.7	0.483	0.669
Mlkl	ENSMUSG00000012519	157	0.7	0.485	0.67
Thoc1	ENSMUSG00000024287	117	0.7	0.484	0.67
Nod1	ENSMUSG00000038058	111	0.7	0.485	0.67
Mybbp1a	ENSMUSG00000040463	114	0.7	0.484	0.67
Chd4	ENSMUSG00000063870	111	0.7	0.484	0.67
Zfp318	ENSMUSG00000015597	81	0.69	0.487	0.673
Hcfc2	ENSMUSG00000020246	126	0.69	0.488	0.674
Bdp1	ENSMUSG00000049658	125	0.69	0.488	0.674
Zswim7	ENSMUSG00000014243	118	0.69	0.49	0.675
Shc2	ENSMUSG00000020312	150	0.69	0.49	0.675
Zfp148	ENSMUSG00000022811	116	0.69	0.491	0.675
Zmynd19	ENSMUSG00000026974	138	0.69	0.491	0.675
Elf4	ENSMUSG00000031103	137	0.69	0.49	0.675
Slc7a7	ENSMUSG00000000958	60	0.69	0.493	0.677
Tnk2	ENSMUSG00000022791	58	0.69	0.493	0.677
Ndrg1	ENSMUSG00000005125	133	0.68	0.496	0.68
Mmp19	ENSMUSG00000025355	111	0.68	0.498	0.68
Mrrf	ENSMUSG00000026887	115	0.68	0.495	0.68
Ahcyl1	ENSMUSG00000027893	113	0.68	0.495	0.68
Abcg2	ENSMUSG00000029802	117	0.68	0.498	0.68
Bag4	ENSMUSG00000037316	133	0.68	0.498	0.68
Crebzf	ENSMUSG00000051451	89	0.68	0.497	0.68
Psip1	ENSMUSG00000028484	114	0.68	0.499	0.681
Id1	ENSMUSG00000042745	125	0.67	0.5	0.682
Tle3	ENSMUSG00000032280	135	0.67	0.502	0.684
Rcan1	ENSMUSG00000022951	122	0.67	0.503	0.685
Tcerg1	ENSMUSG00000024498	113	0.67	0.504	0.686
Zcchc8	ENSMUSG00000029427	128	0.67	0.504	0.686
Baz2a	ENSMUSG00000040054	139	0.67	0.506	0.687
Slmap	ENSMUSG00000021870	115	0.66	0.507	0.689
Cad	ENSMUSG00000013629	104	0.66	0.508	0.69
Helz	ENSMUSG00000020721	122	0.66	0.51	0.692
Slc9a1	ENSMUSG00000028854	129	0.65	0.516	0.697
Slc39a3	ENSMUSG00000046822	135	0.65	0.515	0.697
Nelfcd	ENSMUSG00000016253	124	0.65	0.517	0.698
Brd4	ENSMUSG00000024002	118	0.65	0.519	0.7
Stx11	ENSMUSG00000039232	75	0.65	0.518	0.7
Dnajb4	ENSMUSG00000028035	111	0.64	0.519	0.7
Stxbp1	ENSMUSG00000026797	161	0.64	0.521	0.702
Zfand2b	ENSMUSG00000026197	114	0.64	0.523	0.703
Erf	ENSMUSG00000040857	116	0.64	0.522	0.703
Zfp593	ENSMUSG00000028840	121	0.63	0.526	0.706
Pskh1	ENSMUSG00000048310	151	0.63	0.528	0.708
Zfyve16	ENSMUSG00000021706	45	0.63	0.529	0.709
Nckap1	ENSMUSG00000027002	108	0.63	0.529	0.709
Cdk7	ENSMUSG00000069089	112	0.63	0.53	0.709
Nsmce3	ENSMUSG00000070520	114	0.63	0.531	0.71
Stat3	ENSMUSG00000004040	112	0.62	0.533	0.712
Mxi1	ENSMUSG00000025025	125	0.62	0.534	0.712
Ubn1	ENSMUSG00000039473	119	0.62	0.535	0.713
Rabepk	ENSMUSG00000070953	114	0.62	0.534	0.713
Zbtb45	ENSMUSG00000049600	141	0.62	0.536	0.714
Itgb1bp1	ENSMUSG00000062352	116	0.62	0.536	0.714
Daam1	ENSMUSG00000034574	128	0.62	0.537	0.715
Bmpr2	ENSMUSG00000067336	117	0.62	0.538	0.716
Cdc42ep1	ENSMUSG00000049521	149	0.61	0.54	0.718
Steap2	ENSMUSG00000015653	114	0.61	0.543	0.719
Ino80b	ENSMUSG00000030034	120	0.61	0.543	0.719
Adipor2	ENSMUSG00000030168	128	0.61	0.542	0.719
H2-T22	ENSMUSG00000056116	108	0.61	0.543	0.719
Arhgap35	ENSMUSG00000058230	115	0.61	0.544	0.72
Ide	ENSMUSG00000056999	122	0.6	0.546	0.721
Gata6	ENSMUSG00000005836	116	0.6	0.548	0.722
Ccny	ENSMUSG00000024286	120	0.6	0.548	0.722
Nfkbib	ENSMUSG00000030595	117	0.6	0.547	0.722
Mdm2	ENSMUSG00000020184	120	0.6	0.551	0.723
Sp3	ENSMUSG00000027109	111	0.6	0.551	0.723
Zbtb7b	ENSMUSG00000028042	150	0.6	0.551	0.723
Mef2a	ENSMUSG00000030557	114	0.6	0.551	0.723
Pon2	ENSMUSG00000032667	109	0.6	0.549	0.723
Top2b	ENSMUSG00000017485	114	0.59	0.552	0.723
Bbx	ENSMUSG00000022641	112	0.59	0.552	0.723
Kat8	ENSMUSG00000030801	127	0.59	0.552	0.723
Apbb1	ENSMUSG00000037032	120	0.59	0.552	0.723
Yap1	ENSMUSG00000053110	116	0.59	0.553	0.723
Plxna1	ENSMUSG00000030084	99	0.59	0.554	0.724
Magt1	ENSMUSG00000031232	109	0.59	0.554	0.724
Nolc1	ENSMUSG00000015176	116	0.59	0.555	0.725
Exoc7	ENSMUSG00000020792	118	0.59	0.555	0.725
Sfpq	ENSMUSG00000028820	118	0.59	0.556	0.725
Cptp	ENSMUSG00000029073	109	0.59	0.558	0.728
Zfp672	ENSMUSG00000049755	120	0.58	0.562	0.731
Rbsn	ENSMUSG00000014550	138	0.58	0.565	0.734
Vezf1	ENSMUSG00000018377	118	0.57	0.566	0.734
Plrg1	ENSMUSG00000027998	117	0.57	0.566	0.734
Flot1	ENSMUSG00000059714	116	0.57	0.565	0.734
Tfe3	ENSMUSG00000000134	115	0.57	0.568	0.735
Zfp644	ENSMUSG00000049606	115	0.57	0.567	0.735
Wwp1	ENSMUSG00000041058	122	0.57	0.571	0.738
Mcmbp	ENSMUSG00000048170	129	0.57	0.571	0.738
Mnat1	ENSMUSG00000021103	127	0.56	0.573	0.739
Flii	ENSMUSG00000002812	112	0.56	0.575	0.741
Tmpo	ENSMUSG00000019961	112	0.56	0.574	0.741
Ehmt1	ENSMUSG00000036893	116	0.56	0.575	0.741
Glis2	ENSMUSG00000014303	113	0.56	0.576	0.742
Rnf6	ENSMUSG00000029634	110	0.56	0.577	0.743
Ptpn12	ENSMUSG00000028771	117	0.56	0.579	0.744
Ptpn2	ENSMUSG00000024539	114	0.55	0.579	0.744
Kdm5a	ENSMUSG00000030180	112	0.55	0.579	0.744
Prrx2	ENSMUSG00000039476	111	0.55	0.58	0.745
Atp1b3	ENSMUSG00000032412	111	0.55	0.582	0.747
Carhsp1	ENSMUSG00000008393	120	0.55	0.584	0.748
Mras	ENSMUSG00000032470	126	0.55	0.586	0.749
Cryab	ENSMUSG00000032060	116	0.54	0.587	0.751
Nacc2	ENSMUSG00000026932	134	0.54	0.589	0.752
Trim33	ENSMUSG00000033014	112	0.54	0.59	0.752
Wdr6	ENSMUSG00000066357	120	0.54	0.589	0.752
Zzz3	ENSMUSG00000039068	119	0.54	0.591	0.753
Lmbr1l	ENSMUSG00000022999	122	0.54	0.592	0.755
Anxa4	ENSMUSG00000029994	112	0.53	0.593	0.756
Cby1	ENSMUSG00000022428	114	0.53	0.595	0.757
Taf7	ENSMUSG00000051316	145	0.53	0.596	0.758
Nmt2	ENSMUSG00000026643	111	0.52	0.602	0.763
Ap2b1	ENSMUSG00000035152	115	0.52	0.602	0.763
Fnbp1	ENSMUSG00000075415	124	0.52	0.606	0.767
Vangl1	ENSMUSG00000027860	41	0.51	0.607	0.767
Zbtb38	ENSMUSG00000040433	111	0.51	0.608	0.767
Flot2	ENSMUSG00000061981	109	0.51	0.607	0.767
Ptpra	ENSMUSG00000027303	109	0.51	0.609	0.768
Supt6	ENSMUSG00000002052	115	0.51	0.611	0.769
Hif1a	ENSMUSG00000021109	116	0.51	0.611	0.769
Cxxc1	ENSMUSG00000024560	112	0.51	0.611	0.769
Terf2ip	ENSMUSG00000033430	147	0.51	0.611	0.769
Arid4b	ENSMUSG00000039219	112	0.51	0.611	0.769
Trip10	ENSMUSG00000019487	113	0.51	0.613	0.77
Fosl1	ENSMUSG00000024912	127	0.5	0.615	0.771
Zc3hav1	ENSMUSG00000029826	115	0.5	0.617	0.773
Rbm15	ENSMUSG00000048109	140	0.5	0.616	0.773
Mov10	ENSMUSG00000002227	122	0.5	0.62	0.775
Epb41l2	ENSMUSG00000019978	111	0.5	0.619	0.775
Zc3h7b	ENSMUSG00000022390	53	0.5	0.62	0.775
Slc12a9	ENSMUSG00000037344	28	0.5	0.619	0.775
Gpi1	ENSMUSG00000036427	123	0.49	0.628	0.782
Rab3gap2	ENSMUSG00000039318	110	0.49	0.626	0.782
Picalm	ENSMUSG00000039361	110	0.49	0.628	0.782
Rp2	ENSMUSG00000060090	129	0.49	0.627	0.782
Stat6	ENSMUSG00000002147	113	0.48	0.628	0.782
Ctcf	ENSMUSG00000005698	123	0.48	0.628	0.782
Pacsin2	ENSMUSG00000016664	117	0.48	0.629	0.782
Ncor1	ENSMUSG00000018501	122	0.48	0.629	0.782
Nfat5	ENSMUSG00000003847	112	0.48	0.63	0.783
Gpr39	ENSMUSG00000026343	121	0.48	0.631	0.783
Dcxr	ENSMUSG00000039450	128	0.48	0.63	0.783
Adora2b	ENSMUSG00000018500	121	0.48	0.633	0.784
Dek	ENSMUSG00000021377	114	0.47	0.635	0.786
Atp11b	ENSMUSG00000037400	124	0.47	0.636	0.786
Tfeb	ENSMUSG00000023990	39	0.47	0.639	0.787
Pias2	ENSMUSG00000025423	115	0.47	0.639	0.787
Pnpla2	ENSMUSG00000025509	148	0.47	0.638	0.787
Ssrp1	ENSMUSG00000027067	116	0.47	0.639	0.787
Xrn2	ENSMUSG00000027433	112	0.47	0.639	0.787
Mrgprf	ENSMUSG00000031070	117	0.47	0.637	0.787
Usp8	ENSMUSG00000027363	124	0.47	0.642	0.789
Rbbp7	ENSMUSG00000031353	112	0.47	0.641	0.789
Ing2	ENSMUSG00000063049	110	0.47	0.641	0.789
Polr3c	ENSMUSG00000028099	119	0.46	0.642	0.789
Rel	ENSMUSG00000020275	25	0.46	0.644	0.79
Pdlim5	ENSMUSG00000028273	116	0.46	0.643	0.79
Psd3	ENSMUSG00000030465	132	0.46	0.644	0.79
Prkar2a	ENSMUSG00000032601	115	0.46	0.644	0.79
Pkd2	ENSMUSG00000034462	110	0.46	0.643	0.79
Slc22a17	ENSMUSG00000022199	134	0.46	0.647	0.792
Jade1	ENSMUSG00000025764	123	0.46	0.647	0.792
Ehd2	ENSMUSG00000074364	120	0.46	0.649	0.794
Elp4	ENSMUSG00000027167	127	0.45	0.649	0.794
Cebpz	ENSMUSG00000024081	117	0.45	0.651	0.795
Bbs5	ENSMUSG00000063145	105	0.45	0.65	0.795
Dvl2	ENSMUSG00000020888	139	0.45	0.655	0.797
Il2	ENSMUSG00000027720	152	0.45	0.655	0.797
D430042O09Rik	ENSMUSG00000032743	137	0.45	0.654	0.797
Slc16a2	ENSMUSG00000033965	115	0.45	0.653	0.797
Cnot4	ENSMUSG00000038784	115	0.45	0.654	0.797
Ece1	ENSMUSG00000057530	124	0.45	0.653	0.797
Rab9	ENSMUSG00000079316	116	0.45	0.655	0.797
Bnc2	ENSMUSG00000028487	126	0.44	0.658	0.799
Crk	ENSMUSG00000017776	108	0.44	0.66	0.801
Elp2	ENSMUSG00000024271	114	0.44	0.662	0.801
Phf6	ENSMUSG00000025626	48	0.44	0.66	0.801
Pcyox1	ENSMUSG00000029998	119	0.44	0.662	0.801
Flcn	ENSMUSG00000032633	136	0.44	0.662	0.801
Gabpb1	ENSMUSG00000027361	129	0.44	0.663	0.802
Nln	ENSMUSG00000021710	30	0.43	0.665	0.805
Ascc2	ENSMUSG00000020412	139	0.43	0.668	0.806
Kdm1a	ENSMUSG00000036940	118	0.43	0.667	0.806
Cenpb	ENSMUSG00000068267	114	0.43	0.668	0.806
Grk5	ENSMUSG00000003228	101	0.42	0.671	0.807
Bmpr1a	ENSMUSG00000021796	111	0.42	0.672	0.808
Tarbp2	ENSMUSG00000023051	126	0.42	0.672	0.808
Elp3	ENSMUSG00000022031	118	0.42	0.673	0.809
Elf2	ENSMUSG00000037174	116	0.42	0.674	0.809
Nr2c2	ENSMUSG00000005893	86	0.42	0.676	0.81
Pld2	ENSMUSG00000020828	128	0.42	0.678	0.812
Tnfsf12	ENSMUSG00000097328	109	0.41	0.679	0.813
Eps15l1	ENSMUSG00000006276	92	0.41	0.68	0.814
Zfp410	ENSMUSG00000042472	146	0.41	0.681	0.814
Nufip1	ENSMUSG00000022009	120	0.41	0.684	0.815
Rfc1	ENSMUSG00000029191	121	0.41	0.684	0.815
Tada3	ENSMUSG00000048930	112	0.41	0.684	0.815
Dzip3	ENSMUSG00000064061	136	0.41	0.683	0.815
Ubl3	ENSMUSG00000001687	112	0.41	0.685	0.816
Pmf1	ENSMUSG00000028066	120	0.4	0.689	0.818
Def6	ENSMUSG00000002257	39	0.4	0.69	0.819
Stat1	ENSMUSG00000026104	118	0.4	0.69	0.819
Tfb2m	ENSMUSG00000026492	101	0.4	0.69	0.819
Zfyve21	ENSMUSG00000021286	111	0.4	0.692	0.821
Zdhhc3	ENSMUSG00000025786	119	0.39	0.694	0.821
Fcho2	ENSMUSG00000041685	133	0.39	0.694	0.821
Katnb1	ENSMUSG00000031787	151	0.39	0.696	0.823
Mef2d	ENSMUSG00000001419	121	0.39	0.698	0.824
Pa2g4	ENSMUSG00000025364	113	0.39	0.698	0.824
Itpr2	ENSMUSG00000030287	34	0.39	0.698	0.824
Tirap	ENSMUSG00000032041	150	0.39	0.697	0.824
Med28	ENSMUSG00000015804	118	0.38	0.701	0.827
Ppp6r3	ENSMUSG00000024908	131	0.38	0.701	0.827
1810043G02Rik	ENSMUSG00000020284	134	0.38	0.704	0.828
Zfp422	ENSMUSG00000059878	124	0.38	0.704	0.828
Mpp5	ENSMUSG00000021112	131	0.38	0.706	0.829
Ercc3	ENSMUSG00000024382	135	0.38	0.707	0.829
Cdk11b	ENSMUSG00000029062	114	0.38	0.707	0.829
Zfp266	ENSMUSG00000060510	119	0.38	0.705	0.829
Sos1	ENSMUSG00000024241	47	0.37	0.708	0.83
Ets2	ENSMUSG00000022895	145	0.37	0.711	0.831
Jak2	ENSMUSG00000024789	121	0.37	0.709	0.831
Ago2	ENSMUSG00000036698	121	0.37	0.71	0.831
Chmp3	ENSMUSG00000053119	110	0.37	0.712	0.831
Ghr	ENSMUSG00000055737	122	0.37	0.71	0.831
Suz12	ENSMUSG00000017548	140	0.37	0.714	0.832
Smad4	ENSMUSG00000024515	128	0.37	0.714	0.832
Adcyap1r1	ENSMUSG00000029778	41	0.37	0.714	0.832
Ogt	ENSMUSG00000034160	119	0.37	0.715	0.832
Capn1	ENSMUSG00000024942	120	0.36	0.715	0.832
Stim2	ENSMUSG00000039156	111	0.36	0.717	0.834
Ap2a2	ENSMUSG00000002957	109	0.36	0.721	0.837
Mcm7	ENSMUSG00000029730	124	0.36	0.72	0.837
Nipa1	ENSMUSG00000047037	50	0.36	0.721	0.837
Fat1	ENSMUSG00000070047	133	0.36	0.721	0.838
Trps1	ENSMUSG00000038679	113	0.35	0.726	0.843
Ttc17	ENSMUSG00000027194	40	0.35	0.73	0.845
Lmbrd1	ENSMUSG00000073725	109	0.35	0.729	0.845
Add1	ENSMUSG00000029106	110	0.34	0.73	0.845
Ascc3	ENSMUSG00000038774	142	0.34	0.731	0.845
Slc7a8	ENSMUSG00000022180	109	0.34	0.733	0.847
Dnmt1	ENSMUSG00000004099	152	0.34	0.736	0.848
Xrcc5	ENSMUSG00000026187	119	0.34	0.734	0.848
Cc2d1a	ENSMUSG00000036686	132	0.34	0.735	0.848
Rc3h2	ENSMUSG00000075376	119	0.34	0.734	0.848
Btg1	ENSMUSG00000036478	112	0.33	0.738	0.85
Cdk12	ENSMUSG00000003119	117	0.33	0.741	0.852
Sspn	ENSMUSG00000030255	130	0.33	0.743	0.854
Prdm2	ENSMUSG00000057637	128	0.32	0.745	0.856
Gabpa	ENSMUSG00000008976	119	0.32	0.747	0.857
Cnot6	ENSMUSG00000020362	115	0.32	0.746	0.857
Limd1	ENSMUSG00000025239	113	0.32	0.748	0.857
Fam126a	ENSMUSG00000028995	51	0.32	0.749	0.858
Ascc1	ENSMUSG00000044475	113	0.32	0.752	0.86
Mcm6	ENSMUSG00000026355	126	0.31	0.756	0.864
Ajuba	ENSMUSG00000022178	40	0.31	0.759	0.865
Nfatc3	ENSMUSG00000031902	46	0.31	0.759	0.865
Plscr2	ENSMUSG00000032372	112	0.31	0.759	0.865
Rlim	ENSMUSG00000056537	124	0.31	0.76	0.865
Mta1	ENSMUSG00000021144	132	0.3	0.765	0.868
Safb2	ENSMUSG00000042625	118	0.3	0.765	0.868
Trim24	ENSMUSG00000029833	147	0.3	0.767	0.87
Irak1	ENSMUSG00000031392	115	0.3	0.768	0.871
Zmiz1	ENSMUSG00000007817	109	0.29	0.77	0.872
Ubr2	ENSMUSG00000023977	126	0.29	0.769	0.872
Baz2b	ENSMUSG00000026987	118	0.29	0.77	0.872
Efr3a	ENSMUSG00000015002	110	0.29	0.772	0.873
Sgf29	ENSMUSG00000030714	127	0.29	0.771	0.873
Hoxa5	ENSMUSG00000038253	124	0.29	0.771	0.873
Rbck1	ENSMUSG00000027466	117	0.29	0.774	0.874
Atf5	ENSMUSG00000038539	118	0.29	0.774	0.874
Strn3	ENSMUSG00000020954	115	0.28	0.778	0.878
Ppp1r13l	ENSMUSG00000040734	85	0.28	0.779	0.878
Prpf6	ENSMUSG00000002455	122	0.28	0.783	0.88
Mark2	ENSMUSG00000024969	116	0.28	0.782	0.88
Akap7	ENSMUSG00000039166	34	0.28	0.782	0.88
Tm7sf3	ENSMUSG00000040234	111	0.28	0.783	0.88
Hoxc6	ENSMUSG00000001661	149	0.27	0.786	0.882
Dab2ip	ENSMUSG00000026883	95	0.27	0.791	0.883
Map3k7	ENSMUSG00000028284	138	0.27	0.788	0.883
Pdpn	ENSMUSG00000028583	110	0.27	0.789	0.883
Gmeb1	ENSMUSG00000028901	59	0.27	0.79	0.883
Slc7a6	ENSMUSG00000031904	116	0.27	0.788	0.883
Cd99l2	ENSMUSG00000035776	125	0.27	0.788	0.883
Siah1a	ENSMUSG00000036840	125	0.27	0.789	0.883
Mdm4	ENSMUSG00000054387	143	0.26	0.791	0.883
Ezh1	ENSMUSG00000006920	37	0.26	0.793	0.884
Adam9	ENSMUSG00000031555	113	0.26	0.793	0.884
Aff4	ENSMUSG00000049470	115	0.26	0.794	0.884
Klf10	ENSMUSG00000037465	113	0.26	0.796	0.885
Fam168b	ENSMUSG00000037503	116	0.25	0.8	0.888
Agpat3	ENSMUSG00000001211	118	0.25	0.806	0.889
Ubp1	ENSMUSG00000009741	115	0.25	0.801	0.889
Frs2	ENSMUSG00000020170	28	0.25	0.805	0.889
Pcbd2	ENSMUSG00000021496	109	0.25	0.801	0.889
Nfkb1	ENSMUSG00000028163	115	0.25	0.803	0.889
Scarb1	ENSMUSG00000037936	137	0.25	0.806	0.889
Zbtb22	ENSMUSG00000051390	143	0.25	0.806	0.889
Zdhhc8	ENSMUSG00000060166	122	0.24	0.807	0.889
Ahctf1	ENSMUSG00000026491	127	0.24	0.81	0.891
Ahr	ENSMUSG00000019256	108	0.24	0.814	0.893
Zhx1	ENSMUSG00000022361	162	0.24	0.813	0.893
Nrp1	ENSMUSG00000025810	112	0.24	0.812	0.893
Rif1	ENSMUSG00000036202	65	0.24	0.812	0.893
Bag3	ENSMUSG00000030847	111	0.23	0.814	0.893
Irf3	ENSMUSG00000003184	119	0.23	0.819	0.895
Nup85	ENSMUSG00000020739	128	0.23	0.817	0.895
Wtip	ENSMUSG00000036459	30	0.23	0.817	0.895
Rc3h1	ENSMUSG00000040423	131	0.23	0.818	0.895
Syt11	ENSMUSG00000068923	100	0.23	0.818	0.895
Inpp5k	ENSMUSG00000006127	151	0.22	0.824	0.9
Clip3	ENSMUSG00000013921	118	0.22	0.823	0.9
Cdc42ep2	ENSMUSG00000045664	132	0.22	0.824	0.9
Ccnh	ENSMUSG00000021548	110	0.22	0.828	0.902
Mtf1	ENSMUSG00000028890	112	0.21	0.831	0.904
Ptk2b	ENSMUSG00000059456	126	0.21	0.831	0.904
H2-T23	ENSMUSG00000067212	115	0.21	0.83	0.904
Banp	ENSMUSG00000025316	128	0.21	0.832	0.905
Zmym3	ENSMUSG00000031310	54	0.21	0.832	0.905
Maf1	ENSMUSG00000022553	111	0.21	0.835	0.906
Terf1	ENSMUSG00000025925	134	0.21	0.835	0.906
Foxn3	ENSMUSG00000033713	116	0.21	0.837	0.907
Myo6	ENSMUSG00000033577	130	0.2	0.838	0.908
Cbx4	ENSMUSG00000039989	114	0.2	0.845	0.914
Slc39a10	ENSMUSG00000025986	129	0.19	0.848	0.916
Prrx1	ENSMUSG00000026586	118	0.19	0.849	0.916
Coprs	ENSMUSG00000031458	100	0.19	0.849	0.916
Fam120a	ENSMUSG00000038014	109	0.19	0.847	0.916
Chd2	ENSMUSG00000078671	135	0.19	0.848	0.916
Morc3	ENSMUSG00000039456	129	0.19	0.851	0.917
2610301B20Rik	ENSMUSG00000059482	142	0.19	0.853	0.919
Rab5b	ENSMUSG00000000711	129	0.18	0.854	0.919
Aff1	ENSMUSG00000029313	36	0.18	0.859	0.922
Sptan1	ENSMUSG00000057738	113	0.17	0.861	0.924
Dapp1	ENSMUSG00000028159	125	0.17	0.865	0.927
Slc39a1	ENSMUSG00000052310	167	0.17	0.865	0.927
Cd164	ENSMUSG00000019818	112	0.16	0.869	0.93
Snap29	ENSMUSG00000022765	135	0.16	0.871	0.93
Nkx2-3	ENSMUSG00000044220	136	0.16	0.87	0.93
Rgmb	ENSMUSG00000048027	120	0.16	0.872	0.93
Kdm3a	ENSMUSG00000053470	126	0.16	0.875	0.932
Capns1	ENSMUSG00000001794	119	0.15	0.877	0.933
Supt5	ENSMUSG00000003435	114	0.15	0.877	0.933
Snta1	ENSMUSG00000027488	117	0.15	0.877	0.933
Wiz	ENSMUSG00000024050	48	0.15	0.884	0.939
Irf2bp2	ENSMUSG00000051495	127	0.15	0.884	0.939
Nacc1	ENSMUSG00000001910	125	0.14	0.886	0.94
Ripk2	ENSMUSG00000041135	125	0.14	0.886	0.94
Hipk2	ENSMUSG00000061436	135	0.14	0.886	0.94
Tcirg1	ENSMUSG00000001750	125	0.14	0.89	0.942
Myd88	ENSMUSG00000032508	110	0.14	0.889	0.942
Tcf7l1	ENSMUSG00000055799	149	0.14	0.888	0.942
Cul4b	ENSMUSG00000031095	137	0.14	0.891	0.943
Adam17	ENSMUSG00000052593	119	0.13	0.893	0.943
Tpra1	ENSMUSG00000002871	106	0.13	0.895	0.944
Sertad1	ENSMUSG00000008384	113	0.13	0.896	0.944
Arid5b	ENSMUSG00000019947	110	0.13	0.896	0.944
Nisch	ENSMUSG00000021910	110	0.13	0.897	0.944
Ago1	ENSMUSG00000041530	33	0.13	0.895	0.944
Arid4a	ENSMUSG00000048118	119	0.13	0.896	0.944
Chd9	ENSMUSG00000056608	116	0.13	0.897	0.944
Tsc22d1	ENSMUSG00000022010	112	0.13	0.898	0.945
Zfp277	ENSMUSG00000055917	118	0.12	0.901	0.947
Llgl1	ENSMUSG00000020536	134	0.12	0.902	0.948
Cbr1	ENSMUSG00000051483	111	0.12	0.903	0.948
Churc1	ENSMUSG00000090258	109	0.12	0.905	0.949
Atp8b1	ENSMUSG00000039529	158	0.12	0.907	0.95
Zbtb8os	ENSMUSG00000057572	114	0.12	0.907	0.95
Wdtc1	ENSMUSG00000037622	127	0.11	0.908	0.951
Dab2	ENSMUSG00000022150	118	0.11	0.913	0.954
Svil	ENSMUSG00000024236	119	0.11	0.912	0.954
Rcor1	ENSMUSG00000037896	58	0.11	0.912	0.954
Nfasc	ENSMUSG00000026442	130	0.11	0.915	0.955
Yeats4	ENSMUSG00000020171	115	0.11	0.916	0.956
Acad8	ENSMUSG00000031969	120	0.1	0.917	0.956
Phlda1	ENSMUSG00000020205	120	0.1	0.922	0.959
Stx3	ENSMUSG00000041488	146	0.1	0.922	0.959
Cic	ENSMUSG00000005442	134	0.1	0.924	0.961
Pard3	ENSMUSG00000025812	154	0.09	0.925	0.962
Kmt5c	ENSMUSG00000059851	65	0.09	0.926	0.962
Sorbs3	ENSMUSG00000022091	123	0.09	0.929	0.964
Rhoq	ENSMUSG00000024143	121	0.09	0.932	0.967
Supt16	ENSMUSG00000035726	127	0.08	0.933	0.967
Pygl	ENSMUSG00000021069	116	0.08	0.936	0.968
Smad1	ENSMUSG00000031681	114	0.08	0.936	0.968
Cd2ap	ENSMUSG00000061665	119	0.08	0.937	0.968
Sri	ENSMUSG00000003161	113	0.07	0.944	0.972
Paf1	ENSMUSG00000003437	117	0.07	0.944	0.972
Arid1a	ENSMUSG00000007880	115	0.07	0.944	0.972
Chic2	ENSMUSG00000029229	115	0.07	0.944	0.972
Kdm5b	ENSMUSG00000042207	115	0.07	0.944	0.972
Slc16a1	ENSMUSG00000032902	115	0.07	0.947	0.973
Atxn7	ENSMUSG00000021738	128	0.06	0.949	0.974
Evc	ENSMUSG00000029122	48	0.06	0.95	0.974
Arhgap17	ENSMUSG00000030766	125	0.06	0.948	0.974
Maff	ENSMUSG00000042622	115	0.06	0.951	0.974
Gphn	ENSMUSG00000047454	55	0.06	0.953	0.977
Plscr1	ENSMUSG00000032369	122	0.05	0.96	0.98
Dgka	ENSMUSG00000025357	109	0.05	0.963	0.981
Tsc22d2	ENSMUSG00000027806	112	0.05	0.963	0.981
Eed	ENSMUSG00000030619	127	0.05	0.963	0.981
Vamp5	ENSMUSG00000073002	115	0.05	0.962	0.981
Csrnp1	ENSMUSG00000032515	109	0.04	0.969	0.983
Zfp219	ENSMUSG00000049295	104	0.04	0.966	0.983
Zfpm1	ENSMUSG00000049577	130	0.04	0.968	0.983
Bcl3	ENSMUSG00000053175	116	0.04	0.968	0.983
Trafd1	ENSMUSG00000042726	121	0.04	0.972	0.986
Zbtb8a	ENSMUSG00000028807	124	0.03	0.975	0.987
Rgs10	ENSMUSG00000030844	123	0.03	0.975	0.987
Cask	ENSMUSG00000031012	144	0.03	0.973	0.987
Antxr1	ENSMUSG00000033420	109	0.03	0.975	0.987
Rras	ENSMUSG00000038387	110	0.03	0.976	0.987
Sgms1	ENSMUSG00000040451	121	0.03	0.976	0.987
Amer1	ENSMUSG00000050332	140	0.03	0.974	0.987
Icam1	ENSMUSG00000037405	118	0.03	0.98	0.99
Mfap3	ENSMUSG00000020522	137	0.02	0.981	0.99
Tcf7l2	ENSMUSG00000024985	117	0.02	0.981	0.99
Mier1	ENSMUSG00000028522	114	0.02	0.983	0.99
Dgkz	ENSMUSG00000040479	130	0.02	0.984	0.99
Lrrc8c	ENSMUSG00000054720	120	0.02	0.983	0.99
Plxdc2	ENSMUSG00000026748	113	0.01	0.99	0.995
Suclg2	ENSMUSG00000061838	116	0.01	0.99	0.995
Ptprj	ENSMUSG00000025314	147	0.01	0.991	0.996
Ppp3cb	ENSMUSG00000021816	116	0.01	0.993	0.997
Srgap2	ENSMUSG00000026425	140	0.01	0.993	0.997
Ebag9	ENSMUSG00000022339	118	0	0.997	0.998
Calcoco1	ENSMUSG00000023055	139	0	0.998	0.998
Msl3	ENSMUSG00000031358	118	0	0.997	0.998
Gabpb2	ENSMUSG00000038766	51	0	0.997	0.998
Trappc2	ENSMUSG00000079317	120	0	0.996	0.998
Slc1a5	ENSMUSG00000001918	119	-0.01	0.991	0.996
Runx1t1	ENSMUSG00000006586	159	-0.01	0.994	0.997
Hoxc4	ENSMUSG00000075394	126	-0.01	0.994	0.997
Guca1a	ENSMUSG00000023982	129	-0.01	0.996	0.998
Ppp1r16a	ENSMUSG00000033819	142	-0.02	0.981	0.99
Tapbpl	ENSMUSG00000038213	139	-0.02	0.983	0.99
Mcm3	ENSMUSG00000041859	126	-0.02	0.984	0.99
Zfp280d	ENSMUSG00000038535	44	-0.02	0.985	0.991
Gtf2i	ENSMUSG00000060261	111	-0.03	0.973	0.987
Zkscan17	ENSMUSG00000020472	137	-0.03	0.977	0.988
Dnmt3a	ENSMUSG00000020661	118	-0.03	0.979	0.989
Ripk1	ENSMUSG00000021408	118	-0.04	0.968	0.983
Cpne3	ENSMUSG00000028228	114	-0.04	0.966	0.983
Agtrap	ENSMUSG00000029007	117	-0.04	0.967	0.983
Evc2	ENSMUSG00000050248	139	-0.04	0.967	0.983
Flnc	ENSMUSG00000068699	124	-0.05	0.957	0.978
Notch2	ENSMUSG00000027878	128	-0.05	0.958	0.979
Nf2	ENSMUSG00000009073	92	-0.05	0.961	0.98
Pofut1	ENSMUSG00000046020	91	-0.05	0.96	0.98
Ptp4a1	ENSMUSG00000026064	118	-0.06	0.949	0.974
Rap1b	ENSMUSG00000052681	113	-0.06	0.949	0.974
Slirp	ENSMUSG00000021040	110	-0.06	0.954	0.977
Aplp1	ENSMUSG00000006651	117	-0.06	0.955	0.978
Epc1	ENSMUSG00000024240	144	-0.06	0.955	0.978
Rtf1	ENSMUSG00000027304	116	-0.06	0.956	0.978
Asph	ENSMUSG00000028207	114	-0.07	0.944	0.972
Ddx58	ENSMUSG00000040296	143	-0.07	0.942	0.972
Rab13	ENSMUSG00000027935	110	-0.07	0.946	0.973
Cldn12	ENSMUSG00000046798	38	-0.07	0.948	0.974
Rap2b	ENSMUSG00000036894	131	-0.08	0.933	0.967
Ddr1	ENSMUSG00000003534	116	-0.08	0.937	0.968
Ephb6	ENSMUSG00000029869	36	-0.08	0.937	0.968
Rsf1	ENSMUSG00000035623	119	-0.08	0.935	0.968
Net1	ENSMUSG00000021215	130	-0.08	0.94	0.971
Zfand1	ENSMUSG00000039795	138	-0.08	0.94	0.971
Irf1	ENSMUSG00000018899	110	-0.09	0.925	0.962
Kmt5b	ENSMUSG00000045098	122	-0.09	0.927	0.963
Paxbp1	ENSMUSG00000022974	147	-0.09	0.932	0.967
Syt12	ENSMUSG00000049303	40	-0.1	0.917	0.956
Nfil3	ENSMUSG00000056749	111	-0.1	0.92	0.959
Chd6	ENSMUSG00000057133	139	-0.11	0.91	0.953
Ehd4	ENSMUSG00000027293	127	-0.11	0.915	0.955
Zfp57	ENSMUSG00000036036	53	-0.11	0.916	0.956
Zbtb11	ENSMUSG00000022601	105	-0.12	0.905	0.949
Sik1	ENSMUSG00000024042	37	-0.12	0.904	0.949
Sirt6	ENSMUSG00000034748	59	-0.13	0.893	0.943
Srsf10	ENSMUSG00000028676	112	-0.13	0.898	0.944
Slc7a1	ENSMUSG00000041313	60	-0.13	0.9	0.946
Pik3ca	ENSMUSG00000027665	129	-0.14	0.89	0.943
Anxa2	ENSMUSG00000032231	185	-0.14	0.893	0.943
Ncoa5	ENSMUSG00000039804	130	-0.14	0.891	0.943
Ano6	ENSMUSG00000064210	111	-0.14	0.892	0.943
Zbtb7a	ENSMUSG00000035011	107	-0.15	0.882	0.937
Rab3d	ENSMUSG00000019066	123	-0.16	0.87	0.93
Apbb2	ENSMUSG00000029207	119	-0.16	0.872	0.93
Plscr4	ENSMUSG00000032377	125	-0.16	0.871	0.93
Znrd1	ENSMUSG00000036315	111	-0.16	0.871	0.93
Rb1cc1	ENSMUSG00000025907	119	-0.16	0.874	0.931
B4galt1	ENSMUSG00000028413	113	-0.16	0.876	0.933
Basp1	ENSMUSG00000045763	120	-0.17	0.867	0.929
Gli3	ENSMUSG00000021318	150	-0.17	0.869	0.93
Nkd1	ENSMUSG00000031661	116	-0.18	0.854	0.919
Neu1	ENSMUSG00000007038	130	-0.18	0.858	0.922
Crebbp	ENSMUSG00000022521	123	-0.18	0.856	0.922
Smarcd1	ENSMUSG00000023018	140	-0.18	0.859	0.922
Baiap2	ENSMUSG00000025372	115	-0.18	0.857	0.922
Pde8a	ENSMUSG00000025584	146	-0.18	0.857	0.922
Nfic	ENSMUSG00000055053	113	-0.18	0.861	0.923
Trabd2b	ENSMUSG00000070867	139	-0.18	0.86	0.923
Gstp1	ENSMUSG00000060803	146	-0.19	0.848	0.916
Cand1	ENSMUSG00000020114	116	-0.2	0.838	0.908
Hlx	ENSMUSG00000039377	130	-0.2	0.843	0.912
Ttc8	ENSMUSG00000021013	152	-0.21	0.834	0.906
Pim1	ENSMUSG00000024014	117	-0.21	0.834	0.906
Macf1	ENSMUSG00000028649	115	-0.21	0.834	0.906
Crtc2	ENSMUSG00000027936	41	-0.22	0.828	0.902
Rasgrp2	ENSMUSG00000032946	31	-0.22	0.827	0.902
Setd1b	ENSMUSG00000038384	79	-0.22	0.828	0.902
Zfp30	ENSMUSG00000047473	77	-0.23	0.818	0.895
Frmd6	ENSMUSG00000048285	114	-0.23	0.817	0.895
Irf9	ENSMUSG00000002325	129	-0.24	0.807	0.889
Bach1	ENSMUSG00000025612	122	-0.24	0.814	0.893
Trak2	ENSMUSG00000026028	37	-0.24	0.812	0.893
Rlf	ENSMUSG00000049878	137	-0.24	0.814	0.893
Nrip1	ENSMUSG00000048490	121	-0.25	0.799	0.888
Sgce	ENSMUSG00000004631	110	-0.25	0.803	0.889
Zfp655	ENSMUSG00000007812	128	-0.25	0.802	0.889
Acly	ENSMUSG00000020917	115	-0.25	0.805	0.889
Dnm1	ENSMUSG00000026825	131	-0.25	0.803	0.889
Aebp2	ENSMUSG00000030232	114	-0.25	0.806	0.889
Foxn2	ENSMUSG00000034998	57	-0.25	0.805	0.889
Lrrk2	ENSMUSG00000036273	35	-0.25	0.803	0.889
Fzd7	ENSMUSG00000041075	30	-0.25	0.805	0.889
Ankzf1	ENSMUSG00000026199	26	-0.26	0.792	0.883
Smad3	ENSMUSG00000032402	163	-0.26	0.792	0.883
Cry2	ENSMUSG00000068742	37	-0.26	0.792	0.883
Apbb1ip	ENSMUSG00000026786	121	-0.26	0.795	0.884
Cat	ENSMUSG00000027187	117	-0.26	0.795	0.884
Rab28	ENSMUSG00000029128	113	-0.26	0.794	0.884
Ing3	ENSMUSG00000029670	87	-0.27	0.784	0.88
Zfp800	ENSMUSG00000039841	38	-0.27	0.784	0.88
Taf9b	ENSMUSG00000047242	91	-0.27	0.784	0.88
Pard6a	ENSMUSG00000005699	132	-0.27	0.787	0.883
Stag2	ENSMUSG00000025862	138	-0.27	0.789	0.883
Rapgef6	ENSMUSG00000037533	147	-0.27	0.789	0.883
Taf1	ENSMUSG00000031314	159	-0.28	0.776	0.876
Elk4	ENSMUSG00000026436	124	-0.28	0.783	0.88
Mycbp2	ENSMUSG00000033004	109	-0.29	0.774	0.874
Cnot9	ENSMUSG00000026174	34	-0.3	0.761	0.866
Zfp292	ENSMUSG00000039967	118	-0.3	0.761	0.866
Ifngr1	ENSMUSG00000020009	110	-0.3	0.764	0.868
Smarca2	ENSMUSG00000024921	108	-0.3	0.765	0.868
Cit	ENSMUSG00000029516	82	-0.31	0.755	0.862
Pik3ip1	ENSMUSG00000034614	124	-0.31	0.757	0.864
Rhoj	ENSMUSG00000046768	111	-0.31	0.76	0.865
Ccnt1	ENSMUSG00000011960	127	-0.32	0.747	0.857
Zc3h12a	ENSMUSG00000042677	150	-0.32	0.748	0.857
Glmp	ENSMUSG00000001418	109	-0.32	0.751	0.86
Eps8	ENSMUSG00000015766	117	-0.32	0.751	0.86
Bambi	ENSMUSG00000024232	123	-0.32	0.752	0.86
Trak1	ENSMUSG00000032536	65	-0.33	0.74	0.852
Fas	ENSMUSG00000024778	116	-0.33	0.743	0.854
Snx5	ENSMUSG00000027423	111	-0.34	0.732	0.847
Ing5	ENSMUSG00000026283	54	-0.34	0.735	0.848
Mllt10	ENSMUSG00000026743	119	-0.34	0.736	0.848
Xrn1	ENSMUSG00000032410	127	-0.34	0.736	0.848
Zfp688	ENSMUSG00000045251	66	-0.35	0.73	0.845
Il1r2	ENSMUSG00000026073	145	-0.37	0.711	0.831
Sh3d19	ENSMUSG00000028082	114	-0.37	0.712	0.831
Atrx	ENSMUSG00000031229	110	-0.37	0.712	0.831
Cpne2	ENSMUSG00000034361	110	-0.37	0.714	0.832
Mapk8ip1	ENSMUSG00000027223	135	-0.38	0.701	0.827
Myrf	ENSMUSG00000036098	116	-0.38	0.702	0.827
Nck1	ENSMUSG00000032475	113	-0.38	0.703	0.828
Gtf2e1	ENSMUSG00000022828	37	-0.38	0.706	0.829
Hdac6	ENSMUSG00000031161	81	-0.38	0.706	0.829
Foxo1	ENSMUSG00000044167	141	-0.39	0.694	0.821
Racgap1	ENSMUSG00000023015	192	-0.4	0.686	0.816
Mcm5	ENSMUSG00000005410	125	-0.4	0.689	0.818
Pura	ENSMUSG00000043991	114	-0.4	0.69	0.819
Sqstm1	ENSMUSG00000015837	110	-0.41	0.682	0.814
Csf2ra	ENSMUSG00000059326	139	-0.41	0.682	0.814
Dtnbp1	ENSMUSG00000057531	111	-0.41	0.683	0.815
Il3ra	ENSMUSG00000068758	110	-0.41	0.685	0.816
Arnt	ENSMUSG00000015522	122	-0.42	0.675	0.81
Map3k1	ENSMUSG00000021754	129	-0.42	0.675	0.81
Ptprf	ENSMUSG00000033295	114	-0.42	0.677	0.811
Kat6a	ENSMUSG00000031540	75	-0.43	0.667	0.806
Hltf	ENSMUSG00000002428	80	-0.43	0.669	0.807
Atraid	ENSMUSG00000013622	112	-0.43	0.671	0.807
Ldb1	ENSMUSG00000025223	126	-0.43	0.669	0.807
Atp2b4	ENSMUSG00000026463	134	-0.43	0.67	0.807
Ptpn13	ENSMUSG00000034573	134	-0.43	0.671	0.807
Nox4	ENSMUSG00000030562	144	-0.44	0.658	0.799
Zfp579	ENSMUSG00000051550	131	-0.44	0.659	0.8
P2rx4	ENSMUSG00000029470	119	-0.45	0.656	0.797
Zfp516	ENSMUSG00000058881	120	-0.45	0.655	0.797
Smarcd2	ENSMUSG00000078619	119	-0.46	0.644	0.79
Abi1	ENSMUSG00000058835	113	-0.47	0.638	0.787
Pcgf1	ENSMUSG00000069678	63	-0.48	0.628	0.782
Fer	ENSMUSG00000000127	126	-0.48	0.634	0.784
Tbl1x	ENSMUSG00000025246	118	-0.48	0.633	0.784
Lamp1	ENSMUSG00000031447	115	-0.48	0.632	0.784
Myof	ENSMUSG00000048612	113	-0.48	0.633	0.784
Zcchc24	ENSMUSG00000055538	110	-0.48	0.632	0.784
Pick1	ENSMUSG00000068206	28	-0.49	0.623	0.778
Fryl	ENSMUSG00000070733	44	-0.5	0.614	0.771
Fst	ENSMUSG00000021765	131	-0.51	0.609	0.768
Crebrf	ENSMUSG00000048249	158	-0.51	0.613	0.77
Tceal1	ENSMUSG00000049536	123	-0.51	0.613	0.77
Atp6v0a1	ENSMUSG00000019302	135	-0.52	0.605	0.766
Tmem150a	ENSMUSG00000055912	110	-0.52	0.606	0.767
Zmym2	ENSMUSG00000021945	64	-0.53	0.594	0.756
Mpp6	ENSMUSG00000038388	116	-0.53	0.596	0.758
Zbtb4	ENSMUSG00000018750	127	-0.53	0.598	0.759
Lifr	ENSMUSG00000054263	175	-0.53	0.598	0.759
Tob1	ENSMUSG00000037573	114	-0.53	0.599	0.76
Mylip	ENSMUSG00000038175	54	-0.53	0.599	0.76
Arhgap10	ENSMUSG00000037148	120	-0.54	0.586	0.749
Dis3l	ENSMUSG00000032396	27	-0.55	0.579	0.744
Ank2	ENSMUSG00000032826	107	-0.55	0.582	0.746
Mcc	ENSMUSG00000071856	58	-0.55	0.583	0.747
Sema6d	ENSMUSG00000027200	35	-0.55	0.586	0.749
Braf	ENSMUSG00000002413	82	-0.56	0.577	0.743
Rab8b	ENSMUSG00000036943	132	-0.57	0.566	0.734
Cd320	ENSMUSG00000002308	114	-0.57	0.568	0.735
Cln3	ENSMUSG00000030720	121	-0.57	0.569	0.736
Slc50a1	ENSMUSG00000027953	117	-0.57	0.571	0.738
Clstn1	ENSMUSG00000039953	125	-0.58	0.561	0.73
Tpcn2	ENSMUSG00000048677	137	-0.58	0.561	0.731
Noct	ENSMUSG00000023087	126	-0.58	0.563	0.733
Uhrf1	ENSMUSG00000001228	146	-0.6	0.545	0.721
Shb	ENSMUSG00000044813	126	-0.6	0.547	0.722
Ddx5	ENSMUSG00000020719	118	-0.6	0.552	0.723
Ifitm1	ENSMUSG00000025491	150	-0.6	0.549	0.723
Mecp2	ENSMUSG00000031393	137	-0.6	0.55	0.723
Palm	ENSMUSG00000035863	115	-0.6	0.552	0.723
Stat2	ENSMUSG00000040033	42	-0.61	0.54	0.718
Map3k12	ENSMUSG00000023050	55	-0.61	0.541	0.719
Hipk3	ENSMUSG00000027177	116	-0.61	0.542	0.719
Sdf4	ENSMUSG00000029076	110	-0.61	0.542	0.719
Ncoa3	ENSMUSG00000027678	94	-0.62	0.534	0.712
Rora	ENSMUSG00000032238	115	-0.62	0.533	0.712
Efna5	ENSMUSG00000048915	113	-0.62	0.533	0.712
Gdpd2	ENSMUSG00000019359	56	-0.63	0.526	0.707
Hmbox1	ENSMUSG00000021972	76	-0.63	0.527	0.707
Setd7	ENSMUSG00000037111	127	-0.64	0.521	0.702
Ptger2	ENSMUSG00000037759	98	-0.64	0.524	0.704
Ift57	ENSMUSG00000032965	119	-0.65	0.516	0.698
Wwox	ENSMUSG00000004637	109	-0.66	0.511	0.692
Tnks1bp1	ENSMUSG00000033955	117	-0.66	0.511	0.692
Prc1	ENSMUSG00000038943	139	-0.66	0.512	0.693
Mef2c	ENSMUSG00000005583	70	-0.67	0.502	0.684
Klf11	ENSMUSG00000020653	108	-0.68	0.497	0.68
Zfhx3	ENSMUSG00000038872	122	-0.68	0.498	0.68
Irak4	ENSMUSG00000059883	155	-0.68	0.497	0.68
Enpep	ENSMUSG00000028024	169	-0.71	0.475	0.664
Bcl9l	ENSMUSG00000063382	102	-0.71	0.476	0.664
Tns2	ENSMUSG00000037003	147	-0.71	0.478	0.667
Kmt2c	ENSMUSG00000038056	135	-0.71	0.48	0.669
Nfe2l2	ENSMUSG00000015839	114	-0.72	0.469	0.659
Sod1	ENSMUSG00000022982	116	-0.72	0.47	0.66
Csdc2	ENSMUSG00000042109	56	-0.72	0.472	0.662
Lrp1	ENSMUSG00000040249	113	-0.72	0.474	0.663
Hoxc8	ENSMUSG00000001657	148	-0.73	0.464	0.656
Top2a	ENSMUSG00000020914	123	-0.73	0.464	0.656
Klf6	ENSMUSG00000000078	114	-0.73	0.468	0.658
Ell2	ENSMUSG00000001542	31	-0.74	0.458	0.652
Smurf2	ENSMUSG00000018363	142	-0.74	0.462	0.656
Gon4l	ENSMUSG00000054199	149	-0.75	0.455	0.649
Cenpf	ENSMUSG00000026605	95	-0.76	0.444	0.639
Tmem50b	ENSMUSG00000022964	128	-0.76	0.445	0.64
Xpr1	ENSMUSG00000026469	140	-0.76	0.448	0.642
Uchl1	ENSMUSG00000029223	33	-0.77	0.44	0.636
Ndn	ENSMUSG00000033585	112	-0.77	0.439	0.636
Trp53bp1	ENSMUSG00000043909	86	-0.77	0.439	0.636
Lpl	ENSMUSG00000015568	114	-0.77	0.441	0.637
Klf7	ENSMUSG00000025959	116	-0.77	0.442	0.638
Gclc	ENSMUSG00000032350	33	-0.77	0.444	0.639
Rfx7	ENSMUSG00000037674	68	-0.77	0.444	0.639
Pbxip1	ENSMUSG00000042613	112	-0.77	0.443	0.639
Foxm1	ENSMUSG00000001517	60	-0.78	0.433	0.631
Zbtb44	ENSMUSG00000047412	91	-0.78	0.437	0.635
Gas1	ENSMUSG00000052957	116	-0.79	0.43	0.628
Snapc5	ENSMUSG00000032398	112	-0.79	0.432	0.63
Trip13	ENSMUSG00000021569	124	-0.8	0.421	0.619
Cep89	ENSMUSG00000023072	146	-0.8	0.424	0.621
Cnp	ENSMUSG00000006782	129	-0.82	0.41	0.612
Hoxa7	ENSMUSG00000038236	128	-0.82	0.413	0.614
Creg1	ENSMUSG00000040713	121	-0.82	0.413	0.614
Mink1	ENSMUSG00000020827	91	-0.82	0.415	0.615
Efna2	ENSMUSG00000003070	127	-0.83	0.404	0.606
Pkn1	ENSMUSG00000057672	124	-0.83	0.407	0.608
Arid1b	ENSMUSG00000069729	137	-0.83	0.408	0.609
Mxd3	ENSMUSG00000021485	106	-0.84	0.4	0.602
Ccna2	ENSMUSG00000027715	146	-0.85	0.393	0.598
Sin3a	ENSMUSG00000042557	117	-0.85	0.393	0.598
Fcgrt	ENSMUSG00000003420	115	-0.85	0.396	0.6
Tlcd1	ENSMUSG00000019437	94	-0.85	0.397	0.6
Vim	ENSMUSG00000026728	222	-0.86	0.387	0.594
Trib1	ENSMUSG00000032501	113	-0.86	0.387	0.594
Tjp2	ENSMUSG00000024812	81	-0.86	0.39	0.596
Ahnak2	ENSMUSG00000072812	113	-0.88	0.378	0.587
Fen1	ENSMUSG00000024742	57	-0.88	0.38	0.588
Cenpk	ENSMUSG00000021714	38	-0.89	0.375	0.585
Elf1	ENSMUSG00000036461	120	-0.9	0.366	0.578
Pycard	ENSMUSG00000030793	111	-0.91	0.363	0.576
Ptger3	ENSMUSG00000040016	123	-0.91	0.365	0.577
Melk	ENSMUSG00000035683	95	-0.92	0.357	0.57
Txnip	ENSMUSG00000038393	114	-0.92	0.358	0.571
Foxf1	ENSMUSG00000042812	47	-0.93	0.352	0.566
Dcun1d3	ENSMUSG00000048787	48	-0.93	0.352	0.566
Park7	ENSMUSG00000028964	121	-0.93	0.354	0.567
Asf1b	ENSMUSG00000005470	122	-0.94	0.345	0.56
Abl1	ENSMUSG00000026842	134	-0.94	0.349	0.564
Zfpm2	ENSMUSG00000022306	141	-0.95	0.343	0.56
Sdcbp	ENSMUSG00000028249	118	-0.95	0.344	0.56
Lpar6	ENSMUSG00000033446	73	-0.95	0.345	0.56
Rbpj	ENSMUSG00000039191	109	-0.95	0.344	0.56
Lrp6	ENSMUSG00000030201	117	-0.96	0.335	0.553
Meis2	ENSMUSG00000027210	112	-0.96	0.338	0.555
Zbtb33	ENSMUSG00000048047	33	-0.96	0.339	0.556
S100a6	ENSMUSG00000001025	200	-0.98	0.325	0.543
Dst	ENSMUSG00000026131	117	-0.98	0.325	0.543
Plcl1	ENSMUSG00000038349	82	-0.98	0.325	0.543
Polr2a	ENSMUSG00000005198	134	-0.98	0.326	0.544
Rock2	ENSMUSG00000020580	110	-0.99	0.32	0.538
Rbm39	ENSMUSG00000027620	122	-0.99	0.32	0.538
Zbtb7c	ENSMUSG00000044646	140	-0.99	0.322	0.54
Lima1	ENSMUSG00000023022	116	-1	0.319	0.537
Arrdc4	ENSMUSG00000042659	142	-1.01	0.313	0.532
Zfp36l2	ENSMUSG00000045817	116	-1.01	0.315	0.534
Kmt2a	ENSMUSG00000002028	122	-1.02	0.306	0.526
Zfp592	ENSMUSG00000005621	73	-1.03	0.301	0.522
Egfr	ENSMUSG00000020122	114	-1.03	0.303	0.524
Slc44a1	ENSMUSG00000028412	110	-1.05	0.292	0.513
Zfp62	ENSMUSG00000046311	75	-1.05	0.292	0.513
Cyba	ENSMUSG00000006519	119	-1.05	0.293	0.514
Acvrl1	ENSMUSG00000000530	114	-1.08	0.279	0.501
Fos	ENSMUSG00000021250	362	-1.08	0.279	0.501
Dag1	ENSMUSG00000039952	108	-1.08	0.281	0.503
Lynx1	ENSMUSG00000022594	133	-1.09	0.274	0.497
Tshz1	ENSMUSG00000046982	125	-1.09	0.275	0.498
Gprc5b	ENSMUSG00000008734	114	-1.09	0.276	0.499
Rab29	ENSMUSG00000026433	53	-1.09	0.276	0.499
Ptger4	ENSMUSG00000039942	152	-1.09	0.278	0.499
Tgoln1	ENSMUSG00000056429	109	-1.09	0.277	0.499
Tmem127	ENSMUSG00000034850	136	-1.11	0.265	0.487
Rgma	ENSMUSG00000070509	83	-1.11	0.266	0.487
Jam2	ENSMUSG00000053062	120	-1.12	0.264	0.485
Samhd1	ENSMUSG00000027639	117	-1.12	0.265	0.486
Tigd2	ENSMUSG00000049232	138	-1.12	0.264	0.486
S100a1	ENSMUSG00000044080	120	-1.13	0.26	0.482
Rere	ENSMUSG00000039852	123	-1.14	0.256	0.478
Mysm1	ENSMUSG00000062627	124	-1.14	0.256	0.478
Chd3	ENSMUSG00000018474	109	-1.15	0.25	0.472
Stx4a	ENSMUSG00000030805	113	-1.15	0.25	0.472
Sox12	ENSMUSG00000051817	134	-1.15	0.251	0.472
[truncated: 325 more rows]
